# Supplementary material for: Ketosulfonylmethylenation and sulfonylethyleneation of imidazoheterocycles with dimethylformamide as a methylene source
Source: Royal Society of Chemistry journal article supplement (doi:10.1039/d3cc03850e), 2023-01-01

Ketosulfonylmethylenation and Sulfonylethylenation of  
Imidazoheterocycles with Dimethylformamide as Methylene Source  
Tao Guo,<sup>a</sup> Penghua Hu,<sup>a</sup> Yu Liu,<sup>a</sup> Panke Zhang,<sup>\*b</sup> Yunhui Zhao<sup>\*c</sup> and Congjun Zhu<sup>\*a</sup>

<sup>a</sup> *School of Chemistry and Chemical Engineering, Henan University of Technology,  
Zhengzhou, Henan 450001, P. R. China*

<sup>b</sup> *Green Catalysis Center, College of Chemistry, Henan Advanced Institute of Technology,  
Zhengzhou University, Zhengzhou 450001, PR China.*

<sup>c</sup> *School of Chemistry and Chemical Engineering, Hunan University of Science and  
Technology, Xiangtan, Hunan 411201, P. R. China*

**Supplementary Information**

**Table of Content**

|                                                                                                                                          |    |
|------------------------------------------------------------------------------------------------------------------------------------------|----|
| 1 General Experimental.....                                                                                                              | 2  |
| 2 Optimization of the reaction conditions .....                                                                                          | 2  |
| 3 Deacylation and $\alpha$ -Allylation .....                                                                                             | 4  |
| 4 Control experiments.....                                                                                                               | 4  |
| 5 General procedure for the synthesis of 3-ketosulfonylmethylenated heterocycles 4, 6 and 3-sulfonylethylated imidazoheterocycles 9..... | 4  |
| 6 X-ray diffraction analysis of compound 4j .....                                                                                        | 25 |
| 7 Copies of <sup>1</sup> H and <sup>13</sup> C NMR Spectra .....                                                                         | 28 |

# 1 General Experimental

Unless otherwise mentioned, all materials were commercially obtained and used without further purification. imidazoheterocycles (**3**)<sup>1</sup> were synthesized according to previously described methods. The <sup>1</sup>H NMR, <sup>13</sup>C NMR, and <sup>19</sup>F NMR spectra were recorded at 500 MHz, 126 MHz, 471 MHz, respectively, on a Bruker AM500 MHz with chemical shift values in ppm relative to TMS ( $\delta$ H 0.00 and  $\delta$ C 0.0) as internal standard. The coupling constants *J*, are reported in Hertz (Hz). All melting points were determined on a SGW X-4A melting point instrument without correction. High-resolution mass spectra (HRMS) were recorded on Q-Exactive plus Orbitrap (ESI) or HP-5989A instrument.. Infrared spectra (IR) were recorded on Spectrum TWO. Reactions were monitored by thin layer chromatography (TLC), on glass plates coated with silica gel with Fluorescent indicator (Huanghai, HSGF254) and visualized with UV light at 254 nm. Flash chromatography was performed on silica gel (Huanghai, 300-400) using petroleum ether (PE)-ethyl acetate (EA) as eluent. The structure of product **3c** (CCDC file number 2181031) was further confirmed by X-ray diffraction collected on a diffractometer with graphite-monochromated Cu K $\alpha$  radiation.

## 2 Optimization of the reaction conditions

**Table S1.** Optimization of the reaction with alkynes/sodium sulfite

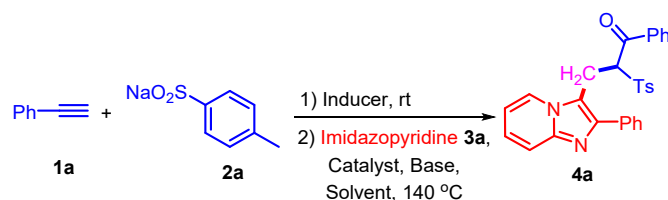

| Entry <sup>a</sup> | Inducer              | Catalyst (0.2 equiv.)                           | Base (2 equiv.)                 | Solvent (2 mL) | Temperature (°C) | Yield (%) <sup>b</sup> |
|--------------------|----------------------|-------------------------------------------------|---------------------------------|----------------|------------------|------------------------|
| 1                  | I <sub>2</sub>       | CoCl <sub>2</sub> ·6H <sub>2</sub> O            | Na <sub>2</sub> CO <sub>3</sub> | DMF            | 140              | 43                     |
| 2                  | I <sub>2</sub>       | CoCl <sub>2</sub> ·6H <sub>2</sub> O            | Na <sub>2</sub> CO <sub>3</sub> | DMSO           | 140              | 22                     |
| 3                  | I <sub>2</sub>       | CoCl <sub>2</sub> ·6H <sub>2</sub> O            | Na <sub>2</sub> CO <sub>3</sub> | DMAc           | 140              | 29                     |
| 4                  | TBAI                 | CoCl <sub>2</sub> ·6H <sub>2</sub> O            | Na <sub>2</sub> CO <sub>3</sub> | DMF            | 140              | 0                      |
| 5                  | NaI                  | CoCl <sub>2</sub> ·6H <sub>2</sub> O            | Na <sub>2</sub> CO <sub>3</sub> | DMF            | 140              | 0                      |
| 6                  | I <sub>2</sub>       | CoCl <sub>2</sub> ·6H <sub>2</sub> O            | --                              | DMF            | 140              | 0                      |
| 7                  | I <sub>2</sub>       | --                                              | Na <sub>2</sub> CO <sub>3</sub> | DMF            | 140              | 0                      |
| 8                  | I <sub>2</sub>       | CoCl <sub>2</sub> ·6H <sub>2</sub> O            | NaHCO <sub>3</sub>              | DMF            | 140              | 67                     |
| 9                  | I <sub>2</sub>       | CoCl <sub>2</sub> ·6H <sub>2</sub> O            | LiOBu                           | DMF            | 140              | 32                     |
| 10                 | I <sub>2</sub>       | CoCl <sub>2</sub> ·6H <sub>2</sub> O            | KOAc                            | DMF            | 140              | 75                     |
| <b>11</b>          | <b>I<sub>2</sub></b> | <b>CoCl<sub>2</sub>·6H<sub>2</sub>O</b>         | <b>NaOAc·3H<sub>2</sub>O</b>    | <b>DMF</b>     | <b>140</b>       | <b>86</b>              |
| 12                 | I <sub>2</sub>       | Co(OAc) <sub>2</sub>                            | NaOAc·3H <sub>2</sub> O         | DMF            | 140              | 43                     |
| 13                 | I <sub>2</sub>       | Co(acac) <sub>2</sub>                           | NaOAc·3H <sub>2</sub> O         | DMF            | 140              | 72                     |
| 14                 | I <sub>2</sub>       | Co(C <sub>2</sub> O <sub>4</sub> ) <sub>2</sub> | NaOAc·3H <sub>2</sub> O         | DMF            | 140              | 56                     |
| 15                 | I <sub>2</sub>       | Co(C <sub>2</sub> O <sub>4</sub> ) <sub>2</sub> | NaOAc·3H <sub>2</sub> O         | DMF            | 140              | 56                     |
| 16                 | I <sub>2</sub>       | Fe(acac) <sub>2</sub>                           | NaOAc·3H <sub>2</sub> O         | DMF            | 140              | 46                     |
| 17                 | I <sub>2</sub>       | Cu(OTf) <sub>2</sub>                            | NaOAc·3H <sub>2</sub> O         | DMF            | 140              | 0                      |
| 18                 | I <sub>2</sub>       | Ni(acac) <sub>2</sub>                           | NaOAc·3H <sub>2</sub> O         | DMF            | 140              | 0                      |

|                 |                |                                      |                         |     |     |    |
|-----------------|----------------|--------------------------------------|-------------------------|-----|-----|----|
| 19              | I <sub>2</sub> | CoCl <sub>2</sub> ·6H <sub>2</sub> O | NaOAc·3H <sub>2</sub> O | DMF | 150 | 84 |
| 20              | I <sub>2</sub> | CoCl <sub>2</sub> ·6H <sub>2</sub> O | NaOAc·3H <sub>2</sub> O | DMF | 130 | 62 |
| 21 <sup>c</sup> | I <sub>2</sub> | CoCl <sub>2</sub> ·6H <sub>2</sub> O | NaOAc·3H <sub>2</sub> O | DMF | 140 | 65 |
| 22 <sup>d</sup> | I <sub>2</sub> | CoCl <sub>2</sub> ·6H <sub>2</sub> O | NaOAc·3H <sub>2</sub> O | DMF | 140 | 0  |

<sup>a</sup>Reaction conditions: **1a** (0.4 mmol), **2a** (0.4 mmol), inducer (1.5 equiv.), and solvent in air reacted at room temperature for 3 h, followed by addition of **3a** (0.2 mmol), catalyst (0.2 equiv.), and base (2 equiv.) under stirring at 140 °C for another 12 h. <sup>b</sup>Isolated yield. <sup>c</sup> CoCl<sub>2</sub>·6H<sub>2</sub>O (0.1 equiv.) was used. <sup>d</sup>Under N<sub>2</sub>.

**Table S2** Optimization of the reaction conditions with styrene/sulfonylhydrazide

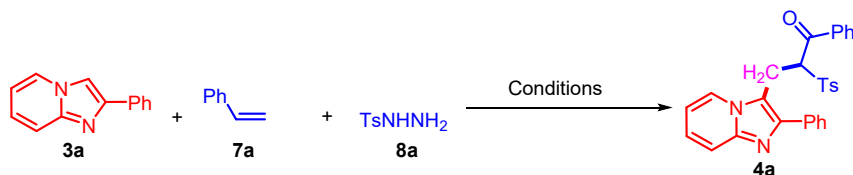

| Entry <sup>a</sup> | Inducer              | Oxidant                                      | Catalyst (0.2 equiv.)                | Base (2 equiv.)              | Solvent (2 mL) | Temperature (°C) | Yield (%) <sup>b</sup> |
|--------------------|----------------------|----------------------------------------------|--------------------------------------|------------------------------|----------------|------------------|------------------------|
| 1                  | I <sub>2</sub>       | --                                           | CoCl <sub>2</sub> ·6H <sub>2</sub> O | NaOAc·3H <sub>2</sub> O      | DMF            | 140              | 0                      |
| 2                  | I <sub>2</sub>       | DTBP                                         | CoCl <sub>2</sub> ·6H <sub>2</sub> O | NaOAc·3H <sub>2</sub> O      | DMF            | 140              | 64                     |
| 3                  | I <sub>2</sub>       | TBHP                                         | CoCl <sub>2</sub> ·6H <sub>2</sub> O | NaOAc·3H <sub>2</sub> O      | DMF            | 140              | 46                     |
| 4                  | I <sub>2</sub>       | K <sub>2</sub> S <sub>2</sub> O <sub>8</sub> | CoCl <sub>2</sub> ·6H <sub>2</sub> O | NaOAc·3H <sub>2</sub> O      | DMF            | 140              | trace                  |
| 5                  | I <sub>2</sub>       | DTBP                                         | Co(acac) <sub>2</sub>                | NaOAc·3H <sub>2</sub> O      | DMF            | 140              | 53                     |
| 6                  | I <sub>2</sub>       | DTBP                                         | Cu(OTf) <sub>2</sub>                 | NaOAc·3H <sub>2</sub> O      | DMF            | 140              | 0                      |
| 7                  | I <sub>2</sub>       | DTBP                                         | Ni(acac) <sub>2</sub>                | NaOAc·3H <sub>2</sub> O      | DMF            | 140              | 0                      |
| 8                  | I <sub>2</sub>       | DTBP                                         | FeCl <sub>2</sub>                    | NaOAc·3H <sub>2</sub> O      | DMF            | 140              | 35                     |
| 9                  | I <sub>2</sub>       | DTBP                                         | FeCl <sub>3</sub> ·6H <sub>2</sub> O | NaOAc·3H <sub>2</sub> O      | DMF            | 140              | 78                     |
| <b>10</b>          | <b>I<sub>2</sub></b> | <b>DTBP</b>                                  | <b>Fe(acac)<sub>3</sub></b>          | <b>NaOAc·3H<sub>2</sub>O</b> | <b>DMF</b>     | <b>140</b>       | <b>83</b>              |
| 11                 | I <sub>2</sub>       | DTBP                                         | Fe(acac) <sub>3</sub>                | Na <sup>t</sup> OBu          | DMF            | 140              | 46                     |
| 12                 | I <sub>2</sub>       | DTBP                                         | Fe(acac) <sub>3</sub>                | KOH                          | DMF            | 140              | 57                     |
| 13                 | I <sub>2</sub>       | DTBP                                         | Fe(acac) <sub>3</sub>                | NaOAc·3H <sub>2</sub> O      | DMSO           | 140              | 51                     |
| 14                 | I <sub>2</sub>       | DTBP                                         | Fe(acac) <sub>3</sub>                | NaOAc·3H <sub>2</sub> O      | DMAc           | 140              | 44                     |
| 15                 | I <sub>2</sub>       | DTBP                                         | Fe(acac) <sub>3</sub>                | NaOAc·3H <sub>2</sub> O      | DMF            | 130              | 64                     |
| 16                 | I <sub>2</sub>       | DTBP                                         | Fe(acac) <sub>3</sub>                | NaOAc·3H <sub>2</sub> O      | DMF            | 150              | 80                     |
| 17                 | NaI                  | DTBP                                         | Fe(acac) <sub>3</sub>                | NaOAc·3H <sub>2</sub> O      | DMF            | 140              | 27                     |
| 18                 | TBAI                 | DTBP                                         | Fe(acac) <sub>3</sub>                | NaOAc·3H <sub>2</sub> O      | DMF            | 140              | 16                     |

<sup>a</sup> Reaction conditions: **3a** (0.2 mmol), **7a** (0.5 mmol), **8a** (0.5 mmol), I<sub>2</sub> (1.5 equiv.), DTBP (3 equiv.), Fe(acac)<sub>3</sub> (0.2 equiv.), NaOAc·3H<sub>2</sub>O (2 equiv.), and solvent in air reacted at room temperature for 3 h, followed by stirring at 140 °C for 12 h. <sup>b</sup> Isolated yield.

### 3 Deacylation and $\alpha$ -Allylation

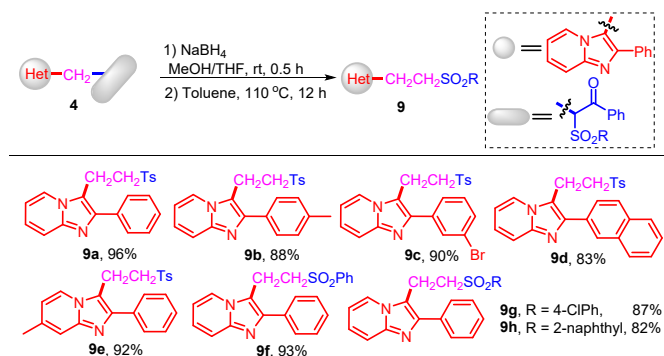

Figure S1 Deacylation reveals the ethylene group.

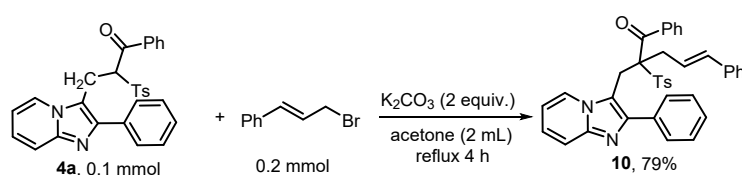

Figure S2  $\alpha$ -Allylation of 4a.

### 4 Control experiments

Treatment of **1a**, **2a**, and  $I_2$  in DMF afforded intermediate **11** in 93% yield. The addition of  $NaOAc \cdot 3H_2O$  transformed **11** into ketosulfone **12** (Figure S1a). The reaction of **7a** and **8a** without  $Fe(acac)_3$  afforded **12** at a 63% yield (Figure S1b). Furthermore, the combination reaction of **12** and **3a** at 140 °C with  $CoCl_2 \cdot 6H_2O$  or  $Fe(acac)_3$  provided **4a** with yields of 91% and 88%, respectively (Figure S1c), indicating that **11** and **12** could be plausible reaction intermediates.

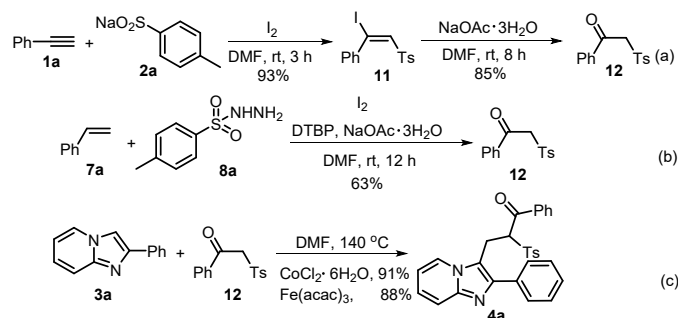

Figure S3 Control experiments

### 5 General procedure for the synthesis of 3-ketosulfonylmethylenated heterocycles **4**, **6** and 3-sulfonylethylated imidazoheterocycles **9**

#### General procedure for synthesis of desired products **4/6** with Co-catalysts, alkynes and sodium sulfite

2 mL DMF, alkynes (**1**, 0.4 mmol (2.0 equiv.)), sodium sulfite (**2**, 0.4 mmol (2.0 equiv.)), and  $I_2$  (76.1 mg, 0.3 mmol (1.5 equiv.)) were added into the dry thick-walled glass pressure tube and stirred in air at room temperature for 3 h, followed by adding imidazoheterocycles (**5**, 0.2 mmol) or indoles/naphthols (0.2 mmol),  $CoCl_2 \cdot 6H_2O$  (9.5 mg, 0.04 mmol),  $NaOAc \cdot 3H_2O$  (54.4 mg, 0.4 mmol)

(2.0 equiv.) and stirring at in a preheated oil bath at 140 °C for in air for another 12 h. Then the reaction was cooled down to room temperature, diluted with 20 mL ethyl acetate and washed with 10 mL H<sub>2</sub>O. The aqueous layer was extracted twice with ethyl acetate (5 mL) and the combined organic phase was dried over Na<sub>2</sub>SO<sub>4</sub>. After evaporation of the solvents the residue was purified by flash column chromatography (silica gel, petroleum ether–ethyl acetate, 2:1 to 1:1) to afford the desired products **4** or **6**.

### General procedure for synthesis of desired products **4** with Fe-catalysts, styrenes and sulfonylhydrazides

2 mL DMF, styrenes (**7**, 0.5 mmol (2.5 equiv.)), sodium sulfite (**8**, 0.5 mmol (2.5 equiv.)), I<sub>2</sub> (76.1 mg, 0.3 mmol (1.5 equiv.)), DTBP (87.7 mg, 0.6mmol (3.0 equiv.)), Fe(acac)<sub>3</sub> (14.1 mg, 0.04mmol), NaOAc·3H<sub>2</sub>O (54.4 mg, 0.4 mmol (2.0 equiv.)) and I<sub>2</sub> (0.3 mmol (1.5 equiv.)) were added into the dry thick-walled glass pressure tube and stirred in air at toom temperature for 3 h, followed by stirring at in a preheated oil bath at 140 °C for in air for another 12 h. Then the reaction was cooled down to room temperature, diluted with 20 mL ethyl acetate and washed with 10 mL H<sub>2</sub>O. The aqueous layer was extracted twice with ethyl acetate (5 mL) and the combined organic phase was dried over Na<sub>2</sub>SO<sub>4</sub>. After evaporation of the solvents the residue was purified by flash column chromatography (silica gel, petroleum ether–ethyl acetate, 2:1 to 1:1) to afford the desired products **4**.

### General procedure for synthesis of desired products **9**.

1 mL THF and 1 mL MeOH, **4** (0.1 mmol), and NaBH<sub>4</sub> (0.1 mmol (3.8 mg, 1.0 equiv.)) were added into the dry thick-walled glass pressure tube and stirred in air at toom temperature for 30 minutes. After the evaporation of the solution, 2 mL of dry toluene was added, followed by stirring in a preheated oil bath at 110 °C for 12 h. Then the reaction was cooled down to room temperature, diluted with 20 mL ethyl acetate and washed with 10 mL H<sub>2</sub>O. The aqueous layer was extracted twice with ethyl acetate (5 mL) and the combined organic phase was dried over Na<sub>2</sub>SO<sub>4</sub>. After evaporation of the solvents the residue was purified by flash column chromatography (silica gel, petroleum ether–ethyl acetate, 2:1 to 1:1) to afford the desired products **9**.

### General procedure for synthesis of desired products **10**.

2 mL of acetone, **4a** (48.1 mg, 0.1mmol), K<sub>2</sub>CO<sub>3</sub> (27.6 mg, 0.2 mmol (2.0 equiv.)), cinnamyl bromide (39.4 mg, 0.2 mmol (2.0 equiv.)) were added into the dry thick-walled glass pressure tube and stirred in air in a preheated oil bath at 60 °C for 4 h. Then the reaction was cooled down to room temperature, diluted with 20 mL ethyl acetate and washed with 10 mL H<sub>2</sub>O. The aqueous layer was extracted twice with ethyl acetate (5 mL) and the combined organic phase was dried over Na<sub>2</sub>SO<sub>4</sub>. After evaporation of the solvents the residue was purified by flash column chromatography (silica gel, petroleum ether–ethyl acetate, 2:1 to 1:1) to afford the desired products **10**.

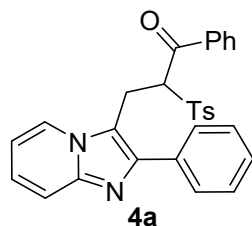

1-phenyl-3-(2-phenylimidazo[1,2-a]pyridin-3-yl)-2-tosylpropan-1-one

**4a** was purified by silica gel chromatography (petroleum ether/ethyl acetate = 2:1 to 1:1).

Yellow solid, mp 165-167 °C.

<sup>1</sup>H NMR (500 MHz, CDCl<sub>3</sub>) δ 8.15 (d, *J* = 7.0 Hz, 1H), 7.64 – 7.63 (m, 2H), 7.58 (d, *J* = 8.0 Hz, 2H), 7.48 (d, *J* = 9.0 Hz, 1H), 7.43 – 7.37 (m, 4H), 7.29 (d, *J* = 7.5 Hz, 2H), 7.23 (d, *J* = 8.0 Hz, 2H), 7.16 (t, *J* = 7.5 Hz, 2H), 7.12 – 7.08 (m, 1H), 6.80 (t, *J* = 6.5 Hz, 1H), 5.37 (t, *J* = 7.0 Hz, 1H), 3.98 (d, *J* = 7.5 Hz, 2H), 2.38 (s, 3H).

<sup>13</sup>C NMR (126 MHz, CDCl<sub>3</sub>) δ 191.9, 145.7, 144.8, 143.2, 136.4, 134.1, 133.9, 133.7, 129.8, 129.1, 128.8, 128.4, 128.0, 127.8, 124.4, 123.4, 117.3, 114.2, 112.4, 66.7, 22.1, 21.6.

IR (KBr): 2920, 1680, 1445, 1326, 1302, 1143, 1052, 743, 700, 678 cm<sup>-1</sup>.

HRMS for C<sub>29</sub>H<sub>25</sub>N<sub>2</sub>O<sub>3</sub>S<sup>+</sup> (M+H)<sup>+</sup>: calcd. 481.15804, found 481.15820.

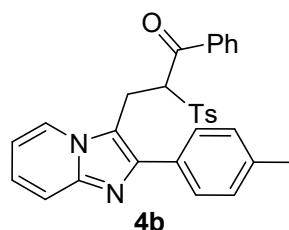

1-phenyl-3-(2-(p-tolyl)imidazo[1,2-a]pyridin-3-yl)-2-tosylpropan-1-one

**4b** was purified by silica gel chromatography (petroleum ether/ethyl acetate = 2:1 to 1:1).

Yellow solid, mp 128-130 °C.

<sup>1</sup>H NMR (500 MHz, CDCl<sub>3</sub>) δ 8.13 (d, *J* = 7.0 Hz, 1H), 7.59 (d, *J* = 8.0 Hz, 2H), 7.54 (d, *J* = 8.0 Hz, 2H), 7.47 (d, *J* = 9.0 Hz, 1H), 7.41 (t, *J* = 7.5 Hz, 1H), 7.33 (d, *J* = 8.0 Hz, 2H), 7.26 – 7.17 (m, 6H), 7.10 (d, *J* = 7.5 Hz, 1H), 6.80 (d, *J* = 6.5 Hz, 1H), 5.39 – 5.37 (m, 1H), 4.00 – 3.91 (m, 2H), 2.43 (s, 3H), 2.42 (s, 3H).

<sup>13</sup>C NMR (126 MHz, CDCl<sub>3</sub>) δ 192.1, 145.7, 144.8, 143.4, 137.9, 136.5, 134.0, 133.7, 131.2, 129.8, 129.6, 129.3, 128.6, 128.5, 127.8, 124.4, 123.4, 117.3, 113.9, 112.4, 66.9, 22.3, 21.7, 21.4

IR (KBr): 2923, 1673, 1593, 1254, 1215, 1148, 1082, 932, 803, 679 cm<sup>-1</sup>.

HRMS for C<sub>30</sub>H<sub>27</sub>N<sub>2</sub>O<sub>3</sub>S<sup>+</sup> (M+H)<sup>+</sup>: calcd. 495.17369, found 495.17404.

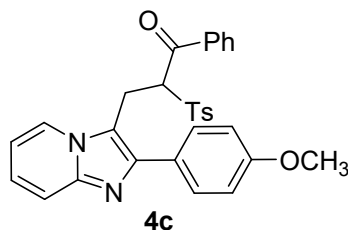

3-(2-(4-methoxyphenyl)imidazo[1,2-a]pyridin-3-yl)-1-phenyl-2-tosylpropan-1-one

**4c** was purified by silica gel chromatography (petroleum ether/ethyl acetate = 2:1 to 1:1).

Yellow solid, mp 66-68 °C.

<sup>1</sup>H NMR (500 MHz, CDCl<sub>3</sub>) δ 8.12 (d, *J* = 7.0 Hz, 1H), 7.59 (t, *J* = 7.5 Hz, 4H), 7.46 (d, *J* = 9.0 Hz, 1H), 7.41 (t, *J* = 7.5 Hz, 1H), 7.33 (d, *J* = 8.0 Hz, 2H), 7.25 (d, *J* = 8.5 Hz, 2H), 7.19 (d, *J* = 7.5 Hz, 2H), 7.11 – 7.08 (m, 1H), 6.95 (d, *J* = 9.0 Hz, 2H), 6.80 (d, *J* = 7.0 Hz, 1H), 5.39 – 5.36 (m, 1H), 3.98 – 3.92 (m, 2H), 3.87 (s, 3H), 2.40 (s, 3H).

<sup>13</sup>C NMR (126 MHz, CDCl<sub>3</sub>) δ 192.0, 159.5, 145.7, 144.7, 143.1, 136.4, 134.0, 133.8, 129.8, 129.3,

129.1, 128.5, 128.5, 126.5, 124.3, 123.4, 117.1, 114.3, 113.5, 112.4, 66.8, 55.3, 22.2, 21.7

**IR (KBr):** 2922, 1676, 1447, 1302, 1250, 1145, 736, 682  $\text{cm}^{-1}$ .

**HRMS for  $\text{C}_{30}\text{H}_{27}\text{N}_2\text{O}_4\text{S}^+$  ( $\text{M}+\text{H}$ )<sup>+</sup>:** calcd. 511.16860, found 511.16824.

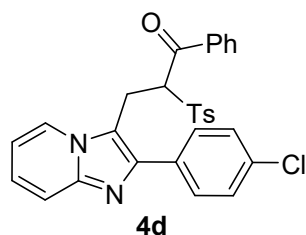

3-(2-(4-chlorophenyl)imidazo[1,2-a]pyridin-3-yl)-1-phenyl-2-tosylpropan-1-one

**4d** was purified by silica gel chromatography (petroleum ether/ethyl acetate = 2:1 to 1:1).

Yellow solid, mp 174-176 °C.

**$^1\text{H}$  NMR (500 MHz,  $\text{CDCl}_3$ )**  $\delta$  8.16 (d,  $J = 7.0$  Hz, 1H), 7.62 – 7.58 (m, 4H), 7.48 (d,  $J = 9.0$  Hz, 1H), 7.43 (t,  $J = 7.0$  Hz, 1H), 7.38 – 7.35 (m, 4H), 7.28 (d,  $J = 8.0$  Hz, 2H), 7.21 (d,  $J = 7.5$  Hz, 2H), 7.14 (t,  $J = 8.0$  Hz, 1H), 6.83 (t,  $J = 7.0$  Hz, 1H), 5.30 – 5.28 (m, 1H), 4.02 – 3.93 (m, 2H), 2.43 (s, 3H).

**$^{13}\text{C}$  NMR (126 MHz,  $\text{CDCl}_3$ )**  $\delta$  191.9, 145.9, 144.9, 142.2, 136.3, 134.2, 134.0, 133.6, 132.6, 129.9, 129.3, 129.1, 129.0, 128.6, 128.5, 124.8, 123.5, 117.4, 114.5, 112.7, 67.0, 22.2, 21.8.

**IR (KBr):** 2919, 1676, 1596, 1310, 1273, 1141, 1088, 822, 726, 685  $\text{cm}^{-1}$ .

**HRMS for  $\text{C}_{29}\text{H}_{24}\text{ClN}_2\text{O}_3\text{S}^+$  ( $\text{M}+\text{H}$ )<sup>+</sup>:** calcd. 515.11907, found 515.11938.

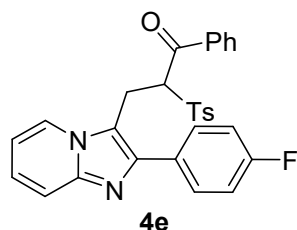

3-(2-(4-fluorophenyl)imidazo[1,2-a]pyridin-3-yl)-1-phenyl-2-tosylpropan-1-one

**4e** was purified by silica gel chromatography (petroleum ether/ethyl acetate = 2:1 to 1:1).

Yellow solid, mp 174-176 °C.

**$^1\text{H}$  NMR (500 MHz,  $\text{CDCl}_3$ )**  $\delta$  8.16 (d,  $J = 7.0$  Hz, 1H), 7.63 – 7.60 (m, 4H), 7.48 (d,  $J = 9.0$  Hz, 1H), 7.42 (t,  $J = 7.5$  Hz, 1H), 7.35 (d,  $J = 7.5$  Hz, 2H), 7.27 (d,  $J = 8.0$  Hz, 2H), 7.21 (t,  $J = 7.5$  Hz, 2H), 7.15 – 7.09 (m, 3H), 6.83 (t,  $J = 7.0$  Hz, 1H), 5.31 – 5.29 (m, 1H), 4.01 – 3.93 (m, 2H), 2.41 (s, 3H).

**$^{13}\text{C}$  NMR (126 MHz,  $\text{CDCl}_3$ )**  $\delta$  191.9, 162.6 (d,  $J_{\text{C-F}} = 246.4$  Hz), 145.9, 144.9, 142.5, 136.3, 134.1, 133.6, 130.2 (d,  $J_{\text{C-F}} = 2.6$  Hz), 129.9, 129.7 (d,  $J_{\text{C-F}} = 8.3$  Hz), 129.3, 128.6, 128.5, 124.7, 123.5, 117.4, 115.8 (d,  $J_{\text{C-F}} = 20.6$  Hz), 114.1, 112.7, 66.9, 22.1, 21.7.

**$^{19}\text{F}$  NMR (470 MHz,  $\text{CDCl}_3$ ):**  $\delta$  -113.41.

**IR (KBr):** 2922, 1678, 1595, 1497, 1324, 1220, 1147, 855, 738, 669  $\text{cm}^{-1}$ .

**HRMS for  $\text{C}_{29}\text{H}_{24}\text{FN}_2\text{O}_3\text{S}^+$  ( $\text{M}+\text{H}$ )<sup>+</sup>:** calcd. 499.14862, found 499.14868.

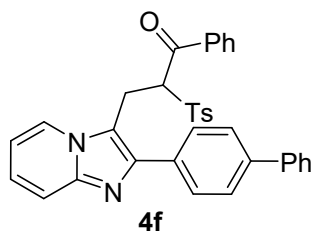

3-(2-([1,1'-biphenyl]-4-yl)imidazo[1,2-a]pyridin-3-yl)-1-phenyl-2-tosylpropan-1-one

**4f** was purified by silica gel chromatography (petroleum ether/ethyl acetate = 2:1 to 1:1).

Yellow solid, mp 109-111 °C.

**<sup>1</sup>H NMR (500 MHz, CDCl<sub>3</sub>)** δ 8.15 (d, *J* = 7.0 Hz, 1H), 7.74 (d, *J* = 8.0 Hz, 2H), 7.66 (t, *J* = 9.0 Hz, 4H), 7.60 (d, *J* = 7.5 Hz, 2H), 7.48 (t, *J* = 8.0 Hz, 3H), 7.39 – 7.33 (m, 4H), 7.21 (d, *J* = 8.0 Hz, 2H), 7.15 (t, *J* = 7.5 Hz, 2H), 7.10 (t, *J* = 8.0 Hz, 1H), 6.79 (t, *J* = 7.0 Hz, 1H), 5.44 – 5.41 (m, 1H), 4.04 – 3.97 (m, 2H), 2.35 (s, 3H).

**<sup>13</sup>C NMR (126 MHz, CDCl<sub>3</sub>)** δ 192.0, 145.7, 144.8, 142.7, 140.5, 140.3, 136.3, 134.0, 133.7, 132.9, 129.8, 129.1, 128.9, 128.5, 128.4, 128.1, 127.5, 127.3, 126.9, 124.5, 123.4, 117.2, 114.4, 112.5, 66.8, 22.2, 21.6.

**IR (KBr):** 2924, 1678, 1595, 1453, 1285, 1147, 1083, 737, 706 cm<sup>-1</sup>.

**HRMS for C<sub>35</sub>H<sub>29</sub>N<sub>2</sub>O<sub>3</sub>S<sup>+</sup> (M+H)<sup>+</sup>:** calcd. 557.18934, found 557.18915.

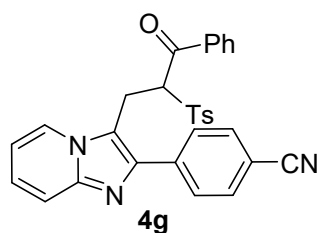

4-(3-(3-oxo-3-phenyl-2-tosylpropyl)imidazo[1,2-a]pyridin-2-yl)benzonitrile

**4g** was purified by silica gel chromatography (petroleum ether/ethyl acetate = 2:1 to 1:1).

Yellow solid, mp 190-192 °C.

**<sup>1</sup>H NMR (500 MHz, CDCl<sub>3</sub>)** δ 8.10 (d, *J* = 7.0 Hz, 1H), 7.74 (d, *J* = 8.0 Hz, 2H), 7.59 (d, *J* = 8.0 Hz, 2H), 7.55 (d, *J* = 8.0 Hz, 2H), 7.42 (d, *J* = 9.0 Hz, 1H), 7.35 (t, *J* = 7.0 Hz, 1H), 7.29 (d, *J* = 7.5 Hz, 2H), 7.20 (d, *J* = 8.0 Hz, 2H), 7.15 – 7.09 (m, 3H), 6.79 (t, *J* = 7.0 Hz, 1H), 5.2 – 5.17 (m, 1H), 3.99 – 3.90 (m, 2H), 2.35 (s, 3H).

**<sup>13</sup>C NMR (126 MHz, CDCl<sub>3</sub>)** δ 191.7, 146.1, 145.2, 141.2, 138.7, 136.2, 134.3, 133.3, 132.5, 130.0, 129.5, 128.6, 128.5, 128.2, 125.3, 123.6, 118.9, 117.7, 115.8, 113.2, 111.3, 67.1, 22.3, 21.8.

**IR (KBr):** 2922, 2225, 1694, 1381, 1203, 1089, 1045, 879, 766 cm<sup>-1</sup>.

**HRMS for C<sub>30</sub>H<sub>24</sub>N<sub>3</sub>O<sub>3</sub>S<sup>+</sup> (M+H)<sup>+</sup>:** calcd. 506.15329, found 506.15280.

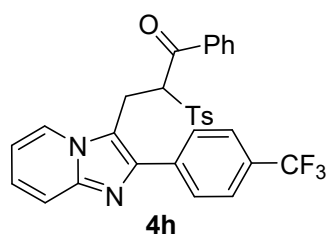

1-phenyl-2-tosyl-3-(2-(4-(trifluoromethyl)phenyl)imidazo[1,2-a]pyridin-3-yl)propan-1-one



**4h** was purified by silica gel chromatography (petroleum ether/ethyl acetate = 2:1 to 1:1).

Yellow solid, mp 172-174 °C.

**<sup>1</sup>H NMR (500 MHz, CDCl<sub>3</sub>)** δ 8.20 (d, *J* = 6.5 Hz, 1H), 7.78 (d, *J* = 8.0 Hz, 2H), 7.65 – 7.61 (m, 4H), 7.51 (d, *J* = 9.0 Hz, 1H), 7.43 (t, *J* = 7.0 Hz, 1H), 7.35 (d, *J* = 8.0 Hz, 2H), 7.28 (d, *J* = 7.0 Hz, 2H), 7.22 – 7.16 (m, 3H), 6.87 (t, *J* = 6.5 Hz, 1H), 5.29 – 5.27 (m, 1H), 4.07 – 3.98 (m, 2H), 2.43 (s, 3H).

**<sup>13</sup>C NMR (126 MHz, CDCl<sub>3</sub>)** δ 191.8, 146.1, 145.1, 141.8, 137.7, 136.3, 134.3, 133.6, 130.0, 129.8 (q, *J*<sub>C-F</sub> = 32.5 Hz), 129.4, 128.7, 128.5, 128.1, 125.7 (q, *J*<sub>C-F</sub> = 3.4 Hz), 125.1, 124.2 (q, *J*<sub>C-F</sub> = 270.3 Hz), 123.7, 117.7, 115.3, 113.0, 67.1, 22.3, 21.7.

**<sup>19</sup>F NMR (470 MHz, CDCl<sub>3</sub>):** δ -62.42.

**IR (KBr):** 2921, 1673, 1625, 1324, 1255, 1138, 1073, 746, 727, 680 cm<sup>-1</sup>.

**HRMS for C<sub>30</sub>H<sub>24</sub>F<sub>3</sub>N<sub>2</sub>O<sub>3</sub>S<sup>+</sup> (M+H)<sup>+</sup>:** calcd. 549.14542, found 549.14569.

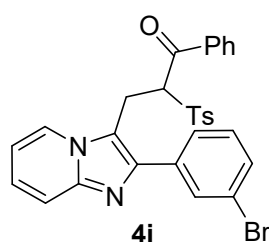

3-(2-(3-bromophenyl)imidazo[1,2-a]pyridin-3-yl)-1-phenyl-2-tosylpropan-1-one

**4i** was purified by silica gel chromatography (petroleum ether/ethyl acetate = 2:1 to 1:1).

Yellow solid, mp 80-82 °C.

**<sup>1</sup>H NMR (500 MHz, CDCl<sub>3</sub>)** δ 8.17 (d, *J* = 7.0 Hz, 1H), 7.79 (m, 1H), 7.58 – 7.54 (m, 3H), 7.51 – 7.48 (m, 2H), 7.43 (t, *J* = 7.0 Hz, 1H), 7.34 (d, *J* = 7.5 Hz, 2H), 7.28 – 7.19 (m, 5H), 7.14 (t, *J* = 7.5 Hz, 1H), 6.84 (d, *J* = 7.0 Hz, 1H), 5.32 (t, *J* = 7.0 Hz, 1H), 3.96 (d, *J* = 7.0 Hz, 2H), 2.39 (s, 3H).

**<sup>13</sup>C NMR (126 MHz, CDCl<sub>3</sub>)** δ 191.8, 145.8, 144.9, 141.8, 136.2, 136.2, 134.1, 133.6, 131.2, 131.0, 130.2, 129.9, 129.2, 128.6, 128.5, 126.1, 124.9, 123.6, 123.1, 117.5, 114.8, 112.8, 66.8, 22.1, 21.7.

**IR (KBr):** 2923, 1677, 1622, 1549, 1352, 1145, 1092, 732, 682 cm<sup>-1</sup>.

**HRMS for C<sub>29</sub>H<sub>24</sub>BrN<sub>2</sub>O<sub>3</sub>S<sup>+</sup> (M+H)<sup>+</sup>:** calcd. 559.06855, found 559.06873.

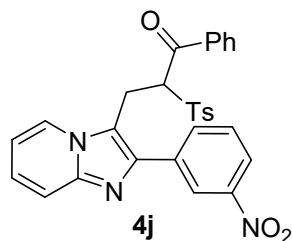

3-(2-(3-nitrophenyl)imidazo[1,2-a]pyridin-3-yl)-1-phenyl-2-tosylpropan-1-one

**4j** was purified by silica gel chromatography (petroleum ether/ethyl acetate = 2:1 to 1:1).

Yellow solid, mp 171-173 °C.

**<sup>1</sup>H NMR (500 MHz, CDCl<sub>3</sub>)** δ 8.45 (s, 1H), 8.24 – 8.20 (m, 2H), 7.97 (d, *J* = 7.5 Hz, 1H), 7.63 – 7.53 (m, 4H), 7.45 (t, *J* = 7.5 Hz, 1H), 7.40 (d, *J* = 7.5 Hz, 2H), 7.28 (d, *J* = 8.0 Hz, 2H), 7.22 (t, *J* = 8.0 Hz, 3H), 6.92 (t, *J* = 7.0 Hz, 1H), 5.28 – 5.25 (m, 1H), 4.08 – 3.97 (m, 2H), 2.43 (s, 3H).

**<sup>13</sup>C NMR (126 MHz, CDCl<sub>3</sub>)** δ 191.6, 148.5, 146.2, 145.2, 141.2, 136.2, 135.9, 134.4, 133.6, 133.2, 130.0, 129.8, 129.4, 128.7, 128.5, 125.4, 123.6, 123.1, 122.7, 117.8, 115.3, 113.3, 67.1, 22.3, 21.8.

**IR (KBr):** 2921, 1672, 1523, 1347, 1283, 1146, 738, 703, 682  $\text{cm}^{-1}$ .

**HRMS for  $\text{C}_{29}\text{H}_{24}\text{N}_3\text{O}_5\text{S}^+$  ( $\text{M}+\text{H}$ ) $^+$ :** calcd. 526.14312, found 526.14325.

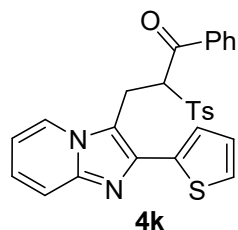

1-phenyl-3-(2-(thiophen-2-yl)imidazo[1,2-a]pyridin-3-yl)-2-tosylpropan-1-one

**4k** was purified by silica gel chromatography (petroleum ether/ethyl acetate = 2:1 to 1:1).

Yellow solid, mp 220-222  $^{\circ}\text{C}$ .

**$^1\text{H}$  NMR (500 MHz,  $\text{CDCl}_3$ )**  $\delta$  8.14 (d,  $J = 7.0$  Hz, 1H), 7.70 (d,  $J = 8.0$  Hz, 2H), 7.48 – 7.40 (m, 5H), 7.38 (d,  $J = 5.0$  Hz, 1H), 7.31 (d,  $J = 8.0$  Hz, 2H), 7.21 (t,  $J = 7.5$  Hz, 2H), 7.15 – 7.13 (m, 1H), 7.09 (t,  $J = 7.5$  Hz, 1H), 6.78 (t,  $J = 7.0$  Hz, 1H), 5.55 – 5.52 (m, 1H), 4.02 – 3.96 (m, 2H), 2.43 (s, 3H).

**$^{13}\text{C}$  NMR (126 MHz,  $\text{CDCl}_3$ )**  $\delta$  192.5, 146.0, 144.9, 138.3, 137.4, 136.5, 134.2, 133.5, 130.0, 129.6, 128.6, 128.3, 126.0, 124.9, 124.2, 123.6, 117.1, 113.3, 112.6, 66.5, 22.4, 21.8.

**IR (KBr):** 2921, 1672, 1523, 1347, 1283, 1145, 738, 703, 682  $\text{cm}^{-1}$ .

**HRMS for  $\text{C}_{27}\text{H}_{23}\text{N}_2\text{O}_3\text{S}_2^+$  ( $\text{M}+\text{H}$ ) $^+$ :** calcd. 487.11446, found 487.11465.

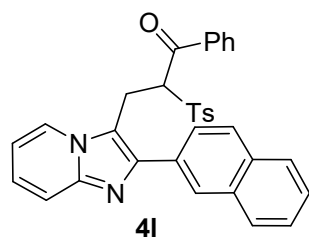

3-(2-(naphthalen-2-yl)imidazo[1,2-a]pyridin-3-yl)-1-phenyl-2-tosylpropan-1-one

**4l** was purified by silica gel chromatography (petroleum ether/ethyl acetate = 2:1 to 1:1).

Yellow solid, mp 160-162  $^{\circ}\text{C}$ .

**$^1\text{H}$  NMR (500 MHz,  $\text{CDCl}_3$ )**  $\delta$  8.18 – 8.16 (m, 2H), 7.91 – 7.87 (m, 4H), 7.54 – 7.51 (m, 5H), 7.33 (t,  $J = 7.5$  Hz, 1H), 7.25 (d,  $J = 7.5$  Hz, 2H), 7.16 – 7.11 (m, 3H), 7.06 (t,  $J = 7.5$  Hz, 2H), 6.81 (t,  $J = 7.0$  Hz, 1H), 5.44 – 5.42 (m, 1H), 4.14 – 4.00 (m, 2H), 2.36 (s, 3H).

**$^{13}\text{C}$  NMR (126 MHz,  $\text{CDCl}_3$ )**  $\delta$  192.1, 145.7, 145.0, 143.1, 136.3, 134.0, 133.7, 133.5, 132.9, 131.5, 129.8, 129.2, 128.6, 128.5, 128.5, 128.4, 127.7, 126.9, 126.5, 126.4, 125.6, 124.6, 123.5, 117.4, 114.7, 112.6, 66.9, 22.3, 21.7.

**IR (KBr):** 2921, 1678, 1594, 1408, 1303, 1146, 1082, 812, 793, 753  $\text{cm}^{-1}$ .

**HRMS for  $\text{C}_{33}\text{H}_{27}\text{N}_2\text{O}_3\text{S}^+$  ( $\text{M}+\text{H}$ ) $^+$ :** calcd. 531.17369, found 531.17407.

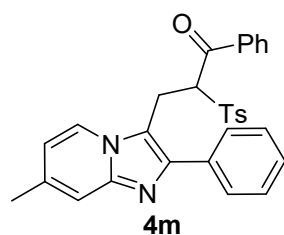

3-(7-methyl-2-phenylimidazo[1,2-a]pyridin-3-yl)-1-phenyl-2-tosylpropan-1-one

**4m** was purified by silica gel chromatography (petroleum ether/ethyl acetate = 2:1 to 1:1).

Yellow solid, mp 152-154 °C.

**<sup>1</sup>H NMR (500 MHz, CDCl<sub>3</sub>)** δ 8.05 (d, *J* = 7.0 Hz, 1H), 7.63 – 7.58 (m, 4H), 7.42 – 7.38 (m, 4H), 7.31 – 7.24 (m, 5H), 7.18 (t, *J* = 7.5 Hz, 2H), 6.66 (d, *J* = 7.0 Hz, 1H), 5.35 (t, *J* = 7.0 Hz, 1H), 3.95 (d, *J* = 7.0 Hz, 2H), 2.41 (s, 3H), 2.34 (s, 3H).

**<sup>13</sup>C NMR (126 MHz, CDCl<sub>3</sub>)** δ 192.0, 145.7, 145.3, 142.8, 136.5, 135.6, 134.1, 134.0, 133.8, 129.9, 129.3, 128.9, 128.5, 128.5, 128.0, 127.8, 122.7, 115.7, 115.2, 113.7, 66.8, 22.1, 21.7, 21.3.

**IR (KBr):** 1669, 1587, 1445, 1326, 1307, 1171, 1034, 851, 760, 716 cm<sup>-1</sup>.

**HRMS for C<sub>30</sub>H<sub>27</sub>N<sub>2</sub>O<sub>3</sub>S<sup>+</sup> (M+H)<sup>+</sup>:** calcd. 495.17369, found 495.17398.

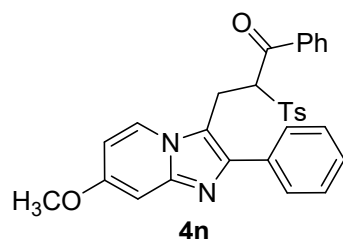

3-(7-methoxy-2-phenylimidazo[1,2-a]pyridin-3-yl)-1-phenyl-2-tosylpropan-1-one

**4n** was purified by silica gel chromatography (petroleum ether/ethyl acetate = 1:1 to 1:2).

Yellow solid, mp 228-230 °C.

**<sup>1</sup>H NMR (500 MHz, CDCl<sub>3</sub>)** δ 7.99 (d, *J* = 7.5 Hz, 1H), 7.65 – 7.61 (m, 4H), 7.45 – 7.39 (m, 4H), 7.34 (d, *J* = 7.5 Hz, 2H), 7.29 (d, *J* = 8.0 Hz, 2H), 7.21 (t, *J* = 7.5 Hz, 2H), 6.76 (d, *J* = 2.0 Hz, 1H), 6.56 – 6.54 (m, 1H), 5.38 – 5.35 (m, 1H), 3.97 – 3.87 (m, 2H), 3.80 (s, 3H), 2.44 (s, 3H).

**<sup>13</sup>C NMR (126 MHz, CDCl<sub>3</sub>)** δ 192.2, 157.9, 146.4, 145.8, 142.6, 136.6, 134.2, 134.1, 133.8, 129.9, 129.4, 128.9, 128.6, 128.6, 127.9, 127.7, 124.1, 113.2, 107.6, 94.6, 67.1, 55.6, 22.3, 21.8.

**IR (KBr):** 2921, 2852, 1651, 1447, 1211, 1172, 1080, 945, 704, 682 cm<sup>-1</sup>.

**HRMS for C<sub>30</sub>H<sub>27</sub>N<sub>2</sub>O<sub>4</sub>S<sup>+</sup> (M+H)<sup>+</sup>:** calcd. 511.16860, found 511.16873.

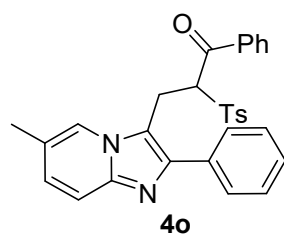

3-(6-methyl-2-phenylimidazo[1,2-a]pyridin-3-yl)-1-phenyl-2-tosylpropan-1-one

**4o** was purified by silica gel chromatography (petroleum ether/ethyl acetate = 2:1 to 1:1).

Yellow solid, mp 110-112 °C.

**<sup>1</sup>H NMR (500 MHz, CDCl<sub>3</sub>)** δ 7.93 (s, 1H), 7.59 (d, *J* = 7.5 Hz, 4H), 7.42 – 7.38 (m, 5H), 7.29 – 7.24 (m, 4H), 7.18 (t, *J* = 7.5 Hz, 2H), 6.97 (d, *J* = 9.0 Hz, 1H), 5.38 – 5.35 (m, 1H), 4.02 – 3.91 (m, 2H), 2.41 (s, 3H), 2.35 (s, 3H).

**<sup>13</sup>C NMR (126 MHz, CDCl<sub>3</sub>)** δ 192.0, 145.7, 144.0, 143.1, 136.5, 134.3, 134.0, 134.0, 129.9, 129.2, 128.8, 128.5, 128.0, 127.9, 127.7, 122.2, 121.1, 116.8, 114.0, 66.7, 22.2, 21.8, 18.6.

**IR (KBr):** 2920, 2851, 1678, 1446, 1312, 1182, 1148, 803, 707 cm<sup>-1</sup>.

HRMS for  $C_{30}H_{27}N_2O_3S^+$  ( $M+H$ )<sup>+</sup>: calcd. 495.17369, found 495.17386.

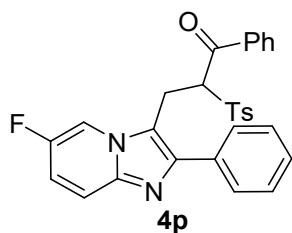

3-(6-fluoro-2-phenylimidazo[1,2-a]pyridin-3-yl)-1-phenyl-2-tosylpropan-1-one

**4p** was purified by silica gel chromatography (petroleum ether/ethyl acetate = 2:1 to 1:1).

Yellow solid, mp 170-172 °C.

<sup>1</sup>H NMR (500 MHz, CDCl<sub>3</sub>) δ 8.11 (m, 1H), 7.63 – 7.58 (m, 4H), 7.47 – 7.40 (m, 5H), 7.32 (d, *J* = 8.0 Hz, 2H), 7.25 (d, *J* = 8.0 Hz, 2H), 7.19 (t, *J* = 7.5 Hz, 2H), 7.06 – 7.02 (m, 1H), 5.36 – 5.34 (m, 1H), 3.97 – 3.87 (m, 2H), 2.41 (s, 3H).

<sup>13</sup>C NMR (126 MHz, CDCl<sub>3</sub>) δ 191.8, 153.3 (d, *J*<sub>C-F</sub> = 235.5 Hz), 145.8, 144.5 (d, *J*<sub>C-F</sub> = 1.4 Hz), 142.5, 136.3, 134.1, 133.7 (d, *J*<sub>C-F</sub> = 25.9 Hz), 129.9, 129.2, 128.9, 128.6, 128.5, 128.3, 127.8, 117.8 (d, *J*<sub>C-F</sub> = 8.9 Hz), 116.5 (d, *J*<sub>C-F</sub> = 24.9 Hz), 115.8 (d, *J*<sub>C-F</sub> = 2.1 Hz), 110.6, 110.3, 66.7, 22.2, 21.7.

<sup>19</sup>F NMR (470 MHz, CDCl<sub>3</sub>): δ -138.99.

IR (KBr): 2922, 1674, 1592, 1506, 1447, 1299, 1212, 1112, 874, 679 cm<sup>-1</sup>.

HRMS for  $C_{29}H_{24}FN_2O_3S^+$  ( $M+H$ )<sup>+</sup>: calcd. 499.14862, found 499.14865.

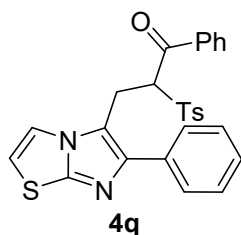

1-phenyl-3-(6-phenylimidazo[2,1-b]thiazol-5-yl)-2-tosylpropan-1-one

**4q** was purified by silica gel chromatography (petroleum ether/ethyl acetate = 2:1 to 1:1).

Yellow solid, mp 147-149 °C..

<sup>1</sup>H NMR (500 MHz, CDCl<sub>3</sub>) δ 7.60 (t, *J* = 8.0 Hz, 4H), 7.48 – 7.44 (m, 4H), 7.39 (t, *J* = 7.0 Hz, 2H), 7.35 – 7.33 (m, 1H), 7.28 – 7.23 (m, 4H), 6.75 (d, *J* = 4.5 Hz, 1H), 5.36 – 5.34 (m, 1H), 3.95 – 3.80 (m, 2H), 2.43 (s, 3H).

<sup>13</sup>C NMR (126 MHz, CDCl<sub>3</sub>) δ 192.2, 148.7, 145.8, 144.2, 136.6, 134.3, 134.2, 133.8, 129.9, 129.3, 128.9, 128.7, 128.7, 127.6, 126.9, 117.8, 116.1, 112.5, 67.4, 23.9, 21.8.

IR (KBr): 2921, 1671, 1596, 1322, 1205, 1149, 1082, 783, 761, 678 cm<sup>-1</sup>.

HRMS for  $C_{27}H_{23}N_2O_3S_2^+$  ( $M+H$ )<sup>+</sup>: calcd. 487.11446, found 487.11459.

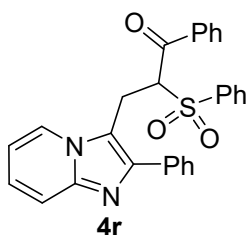

1-phenyl-3-(2-phenylimidazo[1,2-a]pyridin-3-yl)-2-(phenylsulfonyl)propan-1-one

**4r** was purified by silica gel chromatography (petroleum ether/ethyl acetate = 2:1 to 1:1).

Yellow solid, mp 69-71 °C.

**<sup>1</sup>H NMR (500 MHz, CDCl<sub>3</sub>)** δ 8.16 (d, *J* = 7.0 Hz, 1H), 7.69 (d, *J* = 7.5 Hz, 2H), 7.63 – 7.58 (m, 3H), 7.49 – 7.37 (m, 7H), 7.27 (d, *J* = 7.5 Hz, 2H), 7.16 (d, *J* = 7.5 Hz, 2H), 7.13 – 7.10 (t, *J* = 7.5 Hz, 1H), 6.82 (t, *J* = 6.5 Hz, 1H), 5.38 (t, *J* = 7.5 Hz, 1H), 4.00 (d, *J* = 7.0 Hz, 2H).

**<sup>13</sup>C NMR (126 MHz, CDCl<sub>3</sub>)** δ 191.8, 144.9, 143.3, 136.9, 136.3, 134.5, 134.1, 129.2, 129.1, 128.9, 128.5, 128.4, 128.1, 127.9, 124.5, 123.5, 117.4, 114.1, 112.5, 66.6, 22.1.

**IR (KBr):** 2920, 1676, 1479, 1309, 1145, 1081, 863, 769, 679 cm<sup>-1</sup>.

**HRMS for C<sub>28</sub>H<sub>23</sub>N<sub>2</sub>O<sub>3</sub>S<sup>+</sup> (M+H)<sup>+</sup>:** calcd. 467.14239, found 467.14218.

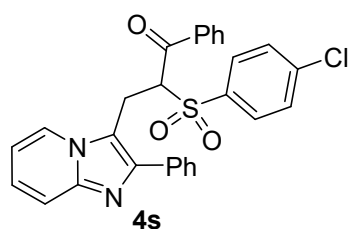

2-((4-chlorophenyl)sulfonyl)-1-phenyl-3-(2-phenylimidazo[1,2-a]pyridin-3-yl)propan-1-one

**4s** was purified by silica gel chromatography (petroleum ether/ethyl acetate = 2:1 to 1:1).

Yellow solid, mp 160-162 °C.

**<sup>1</sup>H NMR (500 MHz, CDCl<sub>3</sub>)** δ 8.13 (d, *J* = 7.0 Hz, 1H), 7.65 – 7.59 (m, 4H), 7.51 – 7.48 (m, 1H), 7.46 – 7.40 (m, 6H), 7.29 – 7.27 (m, 2H), 7.21 – 7.18 (m, 2H), 7.15 – 7.11 (m, 1H), 6.83 (td, *J* = 7.0, 1.0 Hz, 1H), 5.38 – 5.35 (m, 1H), 4.03 – 3.92 (m, 2H).

**<sup>13</sup>C NMR (126 MHz, CDCl<sub>3</sub>)** δ 191.8, 145.0, 143.5, 141.4, 136.2, 135.1, 134.3, 134.1, 130.7, 129.5, 129.0, 128.7, 128.5, 128.2, 128.0, 124.6, 123.4, 117.5, 113.9, 112.7, 66.9, 22.2.

**IR (KBr):** 2923, 2887, 1645, 1379, 1087, 7044, 879, 709 cm<sup>-1</sup>.

**HRMS for C<sub>28</sub>H<sub>22</sub>ClN<sub>2</sub>O<sub>3</sub>S<sup>+</sup> (M+H)<sup>+</sup>:** calcd. 501.10342, found 501.10364.

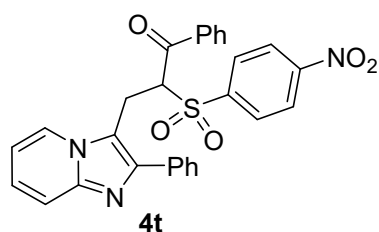

2-((4-nitrophenyl)sulfonyl)-1-phenyl-3-(2-phenylimidazo[1,2-a]pyridin-3-yl)propan-1-one

**4t** was purified by silica gel chromatography (petroleum ether/ethyl acetate = 2:1 to 1:1).

Yellow solid, mp 167-169 °C.

**<sup>1</sup>H NMR (500 MHz, CDCl<sub>3</sub>)** δ 8.22 (d, *J* = 9.0 Hz, 2H), 8.08 (d, *J* = 7.0 Hz, 1H), 7.80 (d, *J* = 9.0 Hz, 2H), 7.62 – 7.60 (m, 2H), 7.49 – 7.40 (m, 5H), 7.31 – 7.28 (m, 2H), 7.21 (t, *J* = 7.5 Hz, 2H), 7.15 – 7.12 (m, 1H), 6.83 (td, *J* = 7.0, 1.0 Hz, 1H), 5.43 – 5.41 (m, 1H), 4.08 – 4.04 (m, 1H), 3.92 – 3.87 (m, 1H).

**<sup>13</sup>C NMR (126 MHz, CDCl<sub>3</sub>)** δ 191.4, 151.0, 144.9, 143.6, 142.1, 135.9, 134.6, 133.9, 130.6, 129.0, 128.8, 128.5, 128.4, 127.9, 124.7, 124.2, 123.2, 117.5, 113.5, 112.7, 66.9, 22.3.

**IR (KBr):** 2922, 1676, 1593, 1530, 1333, 1150, 1080, 733, 700 cm<sup>-1</sup>.

**HRMS for C<sub>28</sub>H<sub>22</sub>N<sub>3</sub>O<sub>5</sub>S<sup>+</sup> (M+H)<sup>+</sup>:** calcd. 512.12747, found 512.12750.

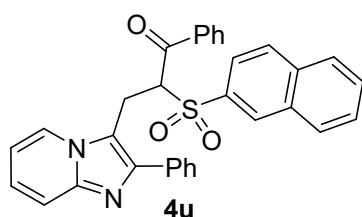

2-(naphthalen-2-ylsulfonyl)-1-phenyl-3-(2-phenylimidazo[1,2-a]pyridin-3-yl)propan-1-one

**4u** was purified by silica gel chromatography (petroleum ether/ethyl acetate = 2:1 to 1:1).

Yellow solid, mp 87-89 °C.

**<sup>1</sup>H NMR (500 MHz, CDCl<sub>3</sub>)** δ 8.24 (s, 1H), 8.17 (d, *J* = 7.0 Hz, 1H), 7.88 (t, *J* = 8.5 Hz, 3H), 7.69 – 7.57 (m, 5H), 7.45 (d, *J* = 9.0 Hz, 1H), 7.33 – 7.29 (m, 6H), 7.13 – 7.08 (m, 3H), 6.81 (t, *J* = 7.0 Hz, 1H), 5.46 – 5.43 (m, 1H), 4.08 – 4.01 (m, 2H).

**<sup>13</sup>C NMR (126 MHz, CDCl<sub>3</sub>)** δ 191.9, 144.9, 143.3, 136.5, 135.6, 134.1, 134.0, 133.9, 131.9, 131.3, 129.8, 129.6, 129.5, 128.9, 128.5, 128.5, 128.1, 128.0, 127.9, 124.6, 123.5, 123.3, 117.4, 114.3, 112.6, 66.9, 22.2.

**IR (KBr):** 2919, 1677, 1593, 1445, 1314, 1145, 749, 680 cm<sup>-1</sup>.

**HRMS for C<sub>32</sub>H<sub>25</sub>N<sub>2</sub>O<sub>3</sub>S<sup>+</sup> (M+H)<sup>+</sup>:** calcd. 517.15804, found 517.15808.

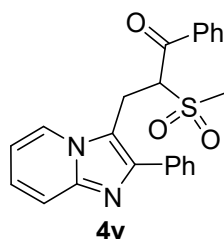

2-(methylsulfonyl)-1-phenyl-3-(2-phenylimidazo[1,2-a]pyridin-3-yl)propan-1-one

**4v** was purified by silica gel chromatography (petroleum ether/ethyl acetate = 2:1 to 1:1).

Yellow solid, mp 178-180 °C.

**<sup>1</sup>H NMR (500 MHz, CDCl<sub>3</sub>)** δ 8.20 (d, *J* = 7.0 Hz, 1H), 7.66 (d, *J* = 7.0 Hz, 2H), 7.55 (d, *J* = 9.0 Hz, 1H), 7.48 (t, *J* = 7.5 Hz, 3H), 7.44 – 7.40 (m, 3H), 7.25 (t, *J* = 8.0 Hz, 2H), 7.19 (t, *J* = 8.0 Hz, 1H), 6.90 (d, *J* = 7.0 Hz, 1H), 5.15 (d, *J* = 9.0 Hz, 1H), 4.16 – 4.03 (m, 2H), 3.02 (s, 3H).

**<sup>13</sup>C NMR (126 MHz, CDCl<sub>3</sub>)** δ 193.4, 145.1, 144.0, 136.0, 134.7, 133.8, 128.9, 128.8, 128.7, 128.4, 128.2, 124.8, 123.2, 117.8, 113.8, 113.0, 66.1, 38.3, 23.3.

**IR (KBr):** 2921, 2852, 1680, 1447, 1304, 1141, 962, 787, 743 cm<sup>-1</sup>.

**HRMS for C<sub>23</sub>H<sub>21</sub>N<sub>2</sub>O<sub>3</sub>S<sup>+</sup> (M+H)<sup>+</sup>:** calcd. 405.12674, found 405.12680.

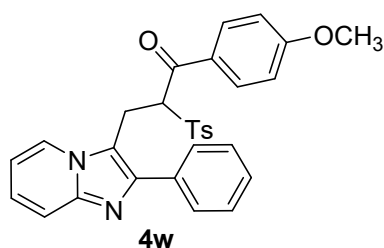

1-(4-methoxyphenyl)-3-(2-phenylimidazo[1,2-a]pyridin-3-yl)-2-tosylpropan-1-one

**4w** was purified by silica gel chromatography (petroleum ether/ethyl acetate = 2:1 to 1:1).

Yellow solid, mp 75-77 °C.

**<sup>1</sup>H NMR (500 MHz, CDCl<sub>3</sub>)** δ 8.14 (d, *J* = 7.0 Hz, 1H), 7.65 (d, *J* = 7.0 Hz, 2H), 7.60 (d, *J* = 8.0 Hz, 2H), 7.47 (d, *J* = 9.0 Hz, 1H), 7.43 – 7.38 (m, 3H), 7.33 (d, *J* = 8.5 Hz, 2H), 7.25 (d, *J* = 8.0 Hz, 2H), 7.09 (d, *J* = 7.5 Hz, 1H), 6.78 (t, *J* = 6.5 Hz, 1H), 6.64 (d, *J* = 9.0 Hz, 2H), 5.32 – 5.29 (m, 1H), 3.98 – 3.91 (m, 2H), 3.72 (s, 3H), 2.40 (s, 3H).

**<sup>13</sup>C NMR (126 MHz, CDCl<sub>3</sub>)** δ 189.8, 164.3, 145.6, 144.8, 143.2, 134.1, 133.7, 131.1, 129.7, 129.4, 129.2, 128.8, 128.0, 127.9, 124.4, 123.5, 117.2, 114.4, 113.7, 112.4, 66.4, 55.5, 22.2, 21.7.

**IR (KBr):** 2921, 1645, 1380, 1247, 1088, 1044, 879, 619 cm<sup>-1</sup>.

**HRMS for C<sub>30</sub>H<sub>27</sub>N<sub>2</sub>O<sub>4</sub>S<sup>+</sup> (M+H)<sup>+</sup>:** calcd. 511.16860, found 511.16849.

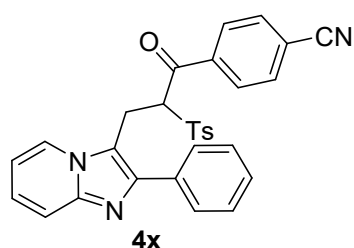

4-(3-(2-phenylimidazo[1,2-a]pyridin-3-yl)-2-tosylpropanoyl)benzonitrile

**4x** was purified by silica gel chromatography (petroleum ether/ethyl acetate = 2:1 to 1:1).

Yellow solid, mp 104-106 °C.

**<sup>1</sup>H NMR (500 MHz, CDCl<sub>3</sub>)** δ 8.11 (d, *J* = 7.0 Hz, 1H), 7.57 – 7.54 (m, 4H), 7.50 – 7.46 (m, 3H), 7.40 – 7.39 (m, 3H), 7.32 (d, *J* = 8.5 Hz, 2H), 7.28 (d, *J* = 8.0 Hz, 2H), 7.16 – 7.13 (m, 1H), 6.84 (t, *J* = 6.5 Hz, 1H), 5.33 – 5.31 (m, 1H), 3.98 – 3.91 (m, 2H), 2.44 (s, 3H).

**<sup>13</sup>C NMR (126 MHz, CDCl<sub>3</sub>)** δ 191.1, 146.2, 145.0, 143.2, 139.2, 134.0, 133.4, 132.3, 130.0, 129.2, 129.0, 128.8, 128.3, 127.9, 124.7, 123.3, 117.5, 117.5, 117.0, 113.8, 112.7, 67.1, 22.1, 21.8.

**IR (KBr):** 2923, 2886, 2205, 1651, 1380, 1256, 1045, 879, 614 cm<sup>-1</sup>.

**HRMS for C<sub>30</sub>H<sub>24</sub>N<sub>3</sub>O<sub>3</sub>S<sup>+</sup> (M+H)<sup>+</sup>:** calcd. 506.15329, found 506.15375.

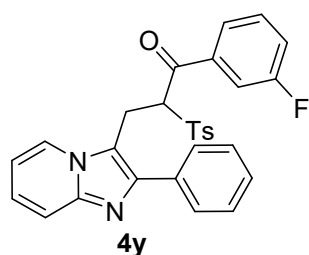

1-(3-(2-phenylimidazo[1,2-a]pyridin-3-yl)-2-tosylpropan-1-one)-3-fluorophenyl

**4y** was purified by silica gel chromatography (petroleum ether/ethyl acetate = 2:1 to 1:1).

Yellow solid, mp 170-172 °C.

**<sup>1</sup>H NMR (500 MHz, CDCl<sub>3</sub>)** δ 8.14 (d, *J* = 7.0 Hz, 1H), 7.61 – 7.56 (m, 4H), 7.49 (d, *J* = 9.0 Hz, 1H), 7.43 – 7.39 (m, 3H), 7.25 (d, *J* = 8.0 Hz, 2H), 7.17 – 7.08 (m, 3H), 7.01 (d, *J* = 7.5 Hz, 1H), 6.96 (d, *J* = 9.0 Hz, 1H), 6.83 (td, *J* = 7.0, 1.0 Hz, 1H), 5.31 – 5.28 (m, 1H), 4.01 – 3.94 (m, 2H), 2.41 (s, 3H).

**<sup>13</sup>C NMR (126 MHz, CDCl<sub>3</sub>)** δ 190.8 (d, *J*<sub>C-F</sub> = 2.3 Hz), 162.4 (d, *J*<sub>C-F</sub> = 248.3 Hz), 145.9, 144.9, 143.3,

138.3 (d,  $J_{C-F} = 6.5$  Hz), 134.0, 133.6, 130.2 (d,  $J_{C-F} = 8.0$  Hz), 129.9, 129.2, 128.9, 128.1, 127.9, 124.6, 124.3 (d,  $J_{C-F} = 2.7$  Hz), 123.4, 121.0 (d,  $J_{C-F} = 20.9$  Hz), 117.4, 115.0 (d,  $J_{C-F} = 22.8$  Hz), 114.0, 112.6, 67.0, 22.0, 21.7.

**$^{19}\text{F}$  NMR (470 MHz,  $\text{CDCl}_3$ ):**  $\delta$  -111.33.

**IR (KBr):** 2920, 1682, 1590, 1441, 1303, 1258, 1142, 791, 723, 669  $\text{cm}^{-1}$ .

**HRMS for  $\text{C}_{29}\text{H}_{24}\text{FN}_2\text{O}_3\text{S}^+$  (M+H) $^+$ :** calcd. 499.14862, found 499.14896.

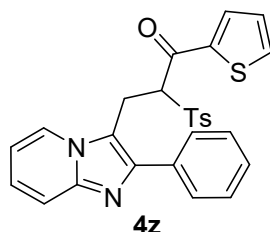

3-(2-phenylimidazo[1,2-a]pyridin-3-yl)-1-(thiophen-2-yl)-2-tosylpropan-1-one

**4z** was purified by silica gel chromatography (petroleum ether/ethyl acetate = 2:1 to 1:1).

Yellow solid, mp 174-176  $^{\circ}\text{C}$ .

**$^1\text{H}$  NMR (500 MHz,  $\text{CDCl}_3$ )**  $\delta$  8.16 (d,  $J = 7.0$  Hz, 1H), 7.67 – 7.63 (m, 4H), 7.55 – 7.52 (m, 2H), 7.45 – 7.39 (m, 3H), 7.29 (d,  $J = 8.0$  Hz, 2H), 7.17 – 7.14 (m, 1H), 7.01 – 7.00 (m, 1H), 6.87 – 6.83 (m, 2H), 5.10 – 5.07 (m, 1H), 4.02 – 3.92 (m, 2H), 2.44 (s, 3H).

**$^{13}\text{C}$  NMR (126 MHz,  $\text{CDCl}_3$ )**  $\delta$  183.7, 145.9, 145.0, 143.6, 143.4, 136.5, 134.4, 134.0, 133.7, 129.9, 129.5, 128.9, 128.5, 128.2, 128.0, 124.7, 123.6, 117.5, 114.3, 112.7, 69.0, 22.2, 21.8.

**IR (KBr):** 2921, 1654, 1516, 1411, 1328, 1259, 1146, 1071, 831, 725  $\text{cm}^{-1}$ .

**HRMS for  $\text{C}_{27}\text{H}_{23}\text{N}_2\text{O}_3\text{S}_2^+$  (M+H) $^+$ :** calcd. 487.11446, found 487.11472.

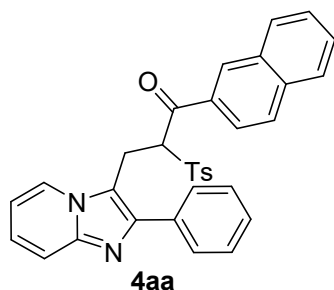

1-(naphthalen-2-yl)-3-(2-phenylimidazo[1,2-a]pyridin-3-yl)-2-tosylpropan-1-one

**4aa** was purified by silica gel chromatography (petroleum ether/ethyl acetate = 2:1 to 1:1).

Yellow solid, mp 95-97  $^{\circ}\text{C}$ .

**$^1\text{H}$  NMR (500 MHz,  $\text{CDCl}_3$ )**  $\delta$  8.19 (d,  $J = 6.5$  Hz, 1H), 7.70 – 7.67 (m, 3H), 7.61 – 7.54 (m, 4H), 7.52 – 7.43 (m, 8H), 7.14 (d,  $J = 8.0$  Hz, 2H), 7.08 (t,  $J = 7.5$  Hz, 1H), 6.81 (t,  $J = 6.5$  Hz, 1H), 5.57 – 5.54 (m, 1H), 4.08 – 4.05 (m, 2H), 2.24 (s, 3H).

**$^{13}\text{C}$  NMR (126 MHz,  $\text{CDCl}_3$ )**  $\delta$  191.6, 145.7, 144.9, 143.2, 135.6, 134.3, 133.8, 131.8, 131.0, 129.8, 129.1, 129.1, 128.9, 128.4, 128.1, 128.1, 127.6, 126.9, 124.4, 123.5, 123.3, 117.4, 114.4, 112.5, 66.8, 21.9, 21.5.

**IR (KBr):** 2920, 1672, 1625, 1594, 1355, 1317, 1083, 810, 750, 703  $\text{cm}^{-1}$ .

**HRMS for  $\text{C}_{33}\text{H}_{27}\text{N}_2\text{O}_3\text{S}^+$  (M+H) $^+$ :** calcd. 531.17369, found 531.17383.



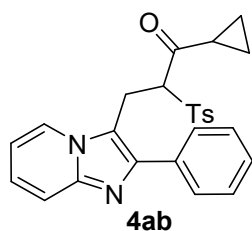

1-cyclopropyl-3-(2-phenylimidazo[1,2-a]pyridin-3-yl)-2-tosylpropan-1-one

**4ab** was purified by silica gel chromatography (petroleum ether/ethyl acetate = 1:1 to 1:2).

Yellow solid, mp 141-143 °C.

**<sup>1</sup>H NMR (500 MHz, CDCl<sub>3</sub>)** δ 8.08 (d, *J* = 6.5 Hz, 1H), 7.69 (m, 4H), 7.57 (d, *J* = 9.5 Hz, 1H), 7.42 (t, *J* = 7.5 Hz, 2H), 7.37 – 7.33 (m, 3H), 7.19 – 7.16 (m, 1H), 6.83 (t, *J* = 7.0 Hz, 1H), 4.53 – 4.51 (m, 1H), 3.94 – 3.79 (m, 2H), 2.46 (s, 3H), 1.86 – 1.81 (m, 1H), 0.90 – 0.86 (m, 1H), 0.72 – 0.68 (m, 2H), 0.53 – 0.49 (m, 1H).

**<sup>13</sup>C NMR (126 MHz, CDCl<sub>3</sub>)** δ 201.6, 145.9, 145.0, 143.5, 134.1, 133.8, 130.0, 129.2, 128.8, 128.0, 128.0, 124.6, 123.6, 117.6, 114.3, 112.5, 73.0, 23.1, 21.8, 21.3, 14.1, 13.1.

**IR (KBr):** 2917, 1679, 1447, 1305, 1142, 963, 783, 689 cm<sup>-1</sup>.

**HRMS for C<sub>26</sub>H<sub>25</sub>N<sub>2</sub>O<sub>3</sub>S<sup>+</sup> (M+H)<sup>+</sup>:** calcd. 445.15804, found 445.15823.

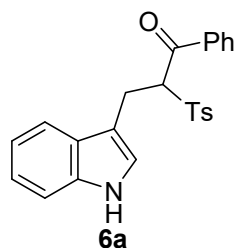

3-(1H-indol-3-yl)-1-phenyl-2-tosylpropan-1-one

**6a** was purified by silica gel chromatography (petroleum ether/ethyl acetate = 4:1 to 2:1).

Yellow solid, mp 173-175 °C.

**<sup>1</sup>H NMR (500 MHz, DMSO-*d*<sub>6</sub>)** δ 10.8 (s, 1H), 7.90 (d, *J* = 7.5 Hz, 2H), 7.79 (d, *J* = 8.0 Hz, 2H), 7.58 (t, *J* = 7.5 Hz, 1H), 7.45 (d, *J* = 8.0 Hz, 2H), 7.43 – 7.40 (m, 3H), 7.25 (d, *J* = 8.0 Hz, 1H), 7.05 – 7.02 (m, 2H), 6.97 (t, *J* = 7.0 Hz, 1H), 6.02 – 5.99 (m, 1H), 3.55 – 3.49 (m, 1H), 3.70 – 3.34 (m, 1H), 2.42 (s, 3H).

**<sup>13</sup>C NMR (126 MHz, DMSO-*d*<sub>6</sub>)** δ 192.2, 145.2, 136.8, 135.9, 134.0, 133.9, 129.8, 129.3, 128.9, 128.6, 126.5, 123.5, 121.2, 118.7, 117.9, 111.5, 108.3, 68.2, 23.2, 21.1.

**IR (KBr):** 2923, 1673, 1594, 1457, 1289, 1128, 1201, 1084, 866, 744 cm<sup>-1</sup>.

**HRMS for C<sub>24</sub>H<sub>20</sub>NO<sub>3</sub>S<sup>-</sup> (M-H)<sup>-</sup>:** calcd. 402.11584, found 402.11649.

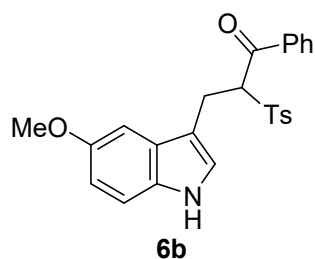

3-(5-methoxy-1H-indol-3-yl)-1-phenyl-2-tosylpropan-1-one

**6b** was purified by silica gel chromatography (petroleum ether/ethyl acetate = 4:1 to 2:1).

Yellow solid, mp 168-170 °C.

<sup>1</sup>H NMR (500 MHz, DMSO-d<sub>6</sub>) δ 10.7 (s, 1H), 7.95 (d, *J* = 7.5 Hz, 2H), 7.87 (d, *J* = 8.0 Hz, 2H), 7.58 (d, *J* = 7.5 Hz, 1H), 7.46 – 7.41 (m, 4H), 7.18 (d, *J* = 8.5 Hz, 1H), 7.00 (d, *J* = 1.5 Hz, 1H), 6.82 (d, *J* = 1.5 Hz, 1H), 6.71 (dd, *J* = 8.5, 2.0 Hz, 1H), 5.97 (dd, *J* = 11.5, 2.5 Hz, 1H), 3.75 (s, 3H), 3.61 – 3.56 (m, 1H), 3.36 – 3.33 (m, 1H), 2.39 (s, 3H).

<sup>13</sup>C NMR (126 MHz, DMSO-d<sub>6</sub>) δ 192.6, 153.7, 145.7, 137.3, 134.7, 134.4, 131.5, 130.3, 129.7, 129.4, 129.1, 127.3, 124.6, 112.7, 112.0, 108.6, 100.0, 68.7, 55.7, 23.9, 21.6.

IR (KBr): 2922, 1678, 1593, 1447, 1316, 1206, 1145, 1071, 746 cm<sup>-1</sup>.

HRMS for C<sub>25</sub>H<sub>22</sub>NO<sub>4</sub>S<sup>-</sup> (M-H)<sup>-</sup>: calcd. 432.12641, found 432.12585

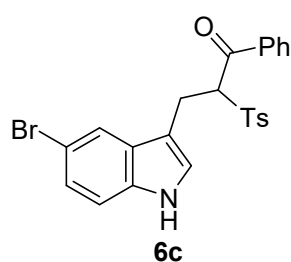

3-(5-bromo-1H-indol-3-yl)-1-phenyl-2-tosylpropan-1-one

**6c** was purified by silica gel chromatography (petroleum ether/ethyl acetate = 3:1 to 1:1).

Yellow solid, mp 171-173 °C.

<sup>1</sup>H NMR (500 MHz, CDCl<sub>3</sub>) δ 11.0 (s, 1H), 7.94 (d, *J* = 7.5 Hz, 2H), 7.82 (d, *J* = 8.5 Hz, 2H), 7.57 (d, *J* = 7.5 Hz, 1H), 7.54 – 7.52 (m, 1H), 7.45 – 7.40 (m, 4H), 7.24 (d, *J* = 8.5 Hz, 1H), 7.16 – 7.13 (m, 2H), 6.61 (dd, *J* = 11.5, 3.0 Hz, 1H), 3.56 – 3.51 (m, 1H), 3.38 – 3.35 (m, 1H), 2.40 (s, 3H).

<sup>13</sup>C NMR (126 MHz, CDCl<sub>3</sub>) δ 192.3, 145.2, 136.8, 134.6, 134.1, 134.0, 129.8, 129.3, 129.0, 128.6, 128.4, 125.3, 123.7, 120.4, 113.5, 111.4, 108.4, 68.4, 23.0, 21.2.

IR (KBr): 2924, 2883, 1651, 1381, 1207, 1087, 1044, 879, 627 cm<sup>-1</sup>.

HRMS for C<sub>24</sub>H<sub>19</sub>BrNO<sub>3</sub>S<sup>-</sup> (M-H)<sup>-</sup>: calcd. 480.02635, found 480.02612

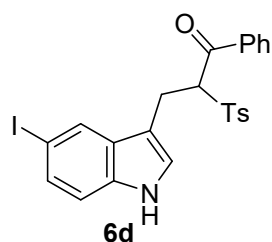

3-(5-iodo-1H-indol-3-yl)-1-phenyl-2-tosylpropan-1-one

**6d** was purified by silica gel chromatography (petroleum ether/ethyl acetate = 3:1 to 1:1).

Yellow solid, mp 180-182 °C.

<sup>1</sup>H NMR (500 MHz, DMSO-d<sub>6</sub>) δ 11.0 (s, 1H), 7.94 (d, *J* = 7.5 Hz, 2H), 7.81 (d, *J* = 8.0 Hz, 2H), 7.67 (s, 1H), 7.57 (t, *J* = 7.5 Hz, 1H), 7.46 – 7.40 (m, 4H), 7.28 (d, *J* = 8.5 Hz, 1H), 7.12 (d, *J* = 8.0 Hz, 1H), 7.06 (s, 1H), 6.00 (dd, *J* = 11.0, 2.5 Hz, 1H), 3.52 – 3.37 (m, 1H), 3.33 – 3.03 (m, 1H), 2.31 (s, 3H).

<sup>13</sup>C NMR (126 MHz, DMSO-d<sub>6</sub>) δ 192.7, 145.7, 137.3, 135.4, 134.5, 134.5, 130.3, 129.8, 129.6, 129.5, 129.1, 127.0, 125.3, 114.4, 108.5, 83.0, 68.8, 23.5, 21.7.

**IR (KBr):** 2921, 1664, 1595, 1273, 1446, 1240, 1077, 746, 683 $\text{cm}^{-1}$ .

**HRMS for  $\text{C}_{24}\text{H}_{19}\text{INO}_3\text{S}^-$  (M-H):** calcd. 528.01248, found 528.01251.

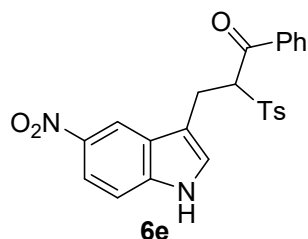

3-(5-nitro-1H-indol-3-yl)-1-phenyl-2-tosylpropan-1-one

**6e** was purified by silica gel chromatography (petroleum ether/ethyl acetate = 5:1 to 3:1).

Yellow solid, mp 194-196  $^{\circ}\text{C}$ .

**$^1\text{H}$  NMR (500 MHz,  $\text{DMSO-d}_6$ )**  $\delta$  11.6 (s, 1H), 8.39 (d,  $J = 2.0$  Hz, 1H), 7.94 – 7.91 (m, 3H), 7.78 (d,  $J = 8.0$  Hz, 2H), 7.58 (t,  $J = 7.5$  Hz, 1H), 7.46 – 7.39 (m, 5H), 7.32 (d,  $J = 2.0$  Hz, 1H), 6.11 – 6.08 (m, 1H), 3.59 – 3.53 (m, 1H), 3.44 – 3.41 (m, 1H), 2.42 (s, 3H).

**$^{13}\text{C}$  NMR (126 MHz,  $\text{DMSO-d}_6$ )**  $\delta$  192.3, 145.3, 140.5, 139.0, 136.7, 134.0, 134.0, 129.8, 129.2, 129.0, 128.6, 127.8, 125.9, 116.6, 115.6, 111.9, 111.5, 68.3, 22.8, 21.1.

**IR (KBr):** 2923, 1653, 1329, 1141, 1079, 811, 738, 680  $\text{cm}^{-1}$ .

**HRMS for  $\text{C}_{24}\text{H}_{19}\text{N}_2\text{O}_5\text{S}^-$  (M-H):** calcd. 447.10092, found 447.10168.

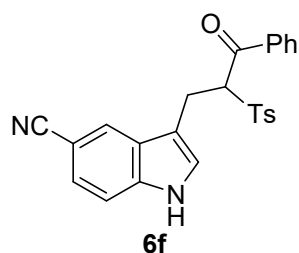

3-(3-oxo-3-phenyl-2-tosylpropyl)-1H-indole-5-carbonitrile

**6f** was purified by silica gel chromatography (petroleum ether/ethyl acetate = 5:1 to 3:1).

Yellow solid, mp 81-83  $^{\circ}\text{C}$ .

**$^1\text{H}$  NMR (500 MHz,  $\text{DMSO-d}_6$ )**  $\delta$  11.4 (s, 1H), 7.91 (d,  $J = 7.5$  Hz, 2H), 7.78 – 7.77 (m, 3H), 7.62 (d,  $J = 8.0$  Hz, 1H), 7.57 (t,  $J = 7.5$  Hz, 1H), 7.43 – 7.39 (m, 5H), 7.32 (dd,  $J = 8.0, 1.0$  Hz, 1H), 6.10 (dd,  $J = 11.0, 3.0$  Hz, 1H), 3.59 – 3.54 (m, 1H), 3.44 – 3.40 (m, 1H), 2.38 (s, 3H).

**$^{13}\text{C}$  NMR (126 MHz,  $\text{DMSO-d}_6$ )**  $\delta$  192.2, 145.2, 136.7, 134.6, 134.0, 134.0, 129.8, 129.6, 129.3, 128.9, 128.6, 128.5, 121.4, 120.6, 119.4, 116.5, 109.6, 102.6, 68.2, 22.8, 21.1.

**IR (KBr):** 2922, 2217, 1675, 1594, 1301, 1233, 1144, 1082, 747, 711  $\text{cm}^{-1}$ .

**HRMS for  $\text{C}_{25}\text{H}_{19}\text{N}_2\text{O}_3\text{S}^-$  (M-H):** calcd. 427.11109, found 427.11047

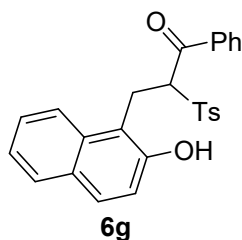

3-(2-hydroxynaphthalen-1-yl)-1-phenyl-2-tosylpropan-1-one

**6g** was purified by silica gel chromatography (petroleum ether/ethyl acetate = 4:1 to 2:1).

Yellow solid, mp 173-175 °C.

**<sup>1</sup>H NMR (500 MHz, CDCl<sub>3</sub>)** δ 7.87 (d, *J* = 8.5 Hz, 1H), 7.74 – 7.70 (m, 5H), 7.58 – 7.51 (m, 2H), 7.45 (t, *J* = 7.5 Hz, 1H), 7.34 – 7.31 (m, 3H), 7.26 (t, *J* = 7.5 Hz, 2H), 7.01 (d, *J* = 8.5 Hz, 1H), 6.90 (s, 1H), 5.62 – 5.59 (m, 1H), 3.88 – 3.84 (m, 1H), 3.76 – 3.70 (m, 1H), 2.44 (s, 3H).

**<sup>13</sup>C NMR (126 MHz, CDCl<sub>3</sub>)** δ 194.5, 152.0, 146.0, 136.4, 134.6, 133.1, 132.7, 129.9, 129.8, 129.7, 129.6, 129.4, 129.0, 128.6, 127.4, 123.5, 121.7, 119.2, 113.0, 69.6, 23.6, 21.8.

**IR (KBr):** 2923, 1676, 1595, 1438, 1287, 1209, 1138, 992, 808, 742 cm<sup>-1</sup>.

**HRMS for C<sub>26</sub>H<sub>21</sub>O<sub>4</sub>S<sup>-</sup> (M-H):** calcd. 429.11551, found 429.11618.

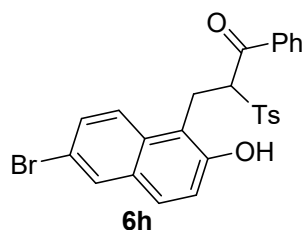

3-(6-bromo-2-hydroxynaphthalen-1-yl)-1-phenyl-2-tosylpropan-1-one

**6h** was purified by silica gel chromatography (petroleum ether/ethyl acetate = 4:1 to 2:1).

Yellow solid, mp 165-167 °C.

**<sup>1</sup>H NMR (500 MHz, DMSO-*d*<sub>6</sub>)** δ 10.2 (s, 1H), 7.94 (d, *J* = 1.5 Hz, 1H), 7.84 (d, *J* = 8.0 Hz, 2H), 7.70 (d, *J* = 11.0 Hz, 1H), 7.59 – 7.56 (m, 3H), 7.53 – 7.50 (m, 2H), 7.45 (d, *J* = 8.0 Hz, 2H), 7.33 (t, *J* = 7.5 Hz, 2H), 7.06 (d, *J* = 9.5 Hz, 1H), 5.81 – 5.78 (m, 1H), 3.81 – 3.76 (m, 1H), 3.55 – 3.52 (m, 1H), 2.42 (s, 3H).

**<sup>13</sup>C NMR (126 MHz, DMSO-*d*<sub>6</sub>)** δ 192.3, 153.7, 145.2, 136.9, 134.5, 133.8, 131.2, 130.0, 129.9, 129.3, 129.2, 128.6, 128.1, 128.1, 124.7, 118.6, 115.3, 113.4, 66.9, 23.9, 21.2.

**IR (KBr):** 2922, 1675, 1501, 1273, 1199, 808, 753, 668 cm<sup>-1</sup>.

**HRMS for C<sub>26</sub>H<sub>20</sub>BrO<sub>4</sub>S<sup>-</sup> (M-H):** calcd. 507.02602, found 507.02655.

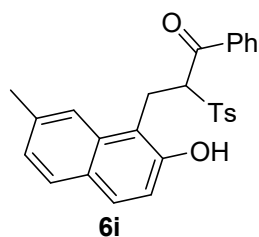

3-(2-hydroxy-7-methylnaphthalen-1-yl)-1-phenyl-2-tosylpropan-1-one

**6i** was purified by silica gel chromatography (petroleum ether/ethyl acetate = 4:1 to 2:1).

Yellow solid, mp 202-204 °C.

**<sup>1</sup>H NMR (500 MHz, DMSO-*d*<sub>6</sub>)** δ 9.87 (s, 1H), 7.91 (d, *J* = 8.0 Hz, 2H), 7.59 – 7.48 (m, 7H), 7.36 (s, 1H), 7.32 (t, *J* = 7.5 Hz, 2H), 7.06 (d, *J* = 8.5 Hz, 1H), 6.89 (d, *J* = 9.0 Hz, 1H), 5.69 (dd, *J* = 10.0, 2.0 Hz, 1H), 3.86 – 3.81 (m, 1H), 3.49 – 3.45 (m, 1H), 2.43 (s, 3H), 2.37 (s, 3H).

**<sup>13</sup>C NMR (126 MHz, DMSO-*d*<sub>6</sub>)** δ 192.3, 153.4, 145.3, 137.1, 135.7, 134.7, 133.8, 132.8, 130.1, 129.3, 128.7, 128.6, 128.4, 128.2, 126.3, 124.6, 121.1, 116.5, 112.2, 67.2, 24.1, 22.0, 21.3.

**IR (KBr):** 2924, 2881, 1650, 1381, 1087, 1044, 879, 763 cm<sup>-1</sup>.

**HRMS for C<sub>27</sub>H<sub>23</sub>O<sub>4</sub>S<sup>-</sup> (M-H)<sup>-</sup>:** calcd. 443.13116, found 443.13104.

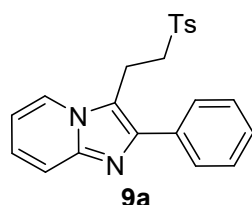

2-phenyl-3-(2-tosylethyl)imidazo[1,2-a]pyridine

**9a** was purified by silica gel chromatography (petroleum ether/ethyl acetate = 2:1 to 1:1).

Yellow solid, mp 180-182 °C.

**<sup>1</sup>H NMR (500 MHz, CDCl<sub>3</sub>)** δ 7.84 (d, *J* = 6.5 Hz, 1H), 7.66 (d, *J* = 8.0 Hz, 2H), 7.51 (d, *J* = 9.0 Hz, 1H), 7.47 (d, *J* = 7.0 Hz, 2H), 7.28 – 7.23 (m, 5H), 7.10 (t, *J* = 7.5 Hz, 1H), 6.77 (t, *J* = 7.0 Hz, 1H), 3.46 – 3.43 (m, 2H), 3.28 – 3.25 (m, 2H), 2.36 (s, 3H).

**<sup>13</sup>C NMR (126 MHz, CDCl<sub>3</sub>)** δ 145.2, 144.8, 143.3, 135.4, 134.0, 130.1, 128.7, 128.0, 127.9, 127.9, 124.4, 122.7, 117.8, 115.3, 112.8, 53.2, 21.7, 17.7.

**IR (KBr)** 2920, 1595, 1449, 1358, 1288, 1138, 1085, 812, 777, 730 cm<sup>-1</sup>.

**HRMS for C<sub>22</sub>H<sub>21</sub>N<sub>2</sub>O<sub>2</sub>S<sup>+</sup> (M+H)<sup>+</sup>:** calcd. 377.13183, found 377.13199.

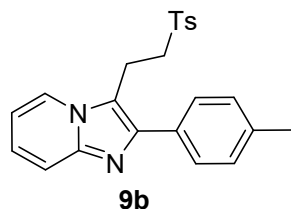

2-(p-tolyl)-3-(2-tosylethyl)imidazo[1,2-a]pyridine

**9b** was purified by silica gel chromatography (petroleum ether/ethyl acetate = 2:1 to 1:1).

Yellow solid, mp 203-205 °C.

**<sup>1</sup>H NMR (500 MHz, CDCl<sub>3</sub>)** δ 7.84 (d, *J* = 7.0 Hz, 1H), 7.67 (d, *J* = 8.0 Hz, 2H), 7.51 (d, *J* = 9.0 Hz, 1H), 7.37 (d, *J* = 7.5 Hz, 2H), 7.26 (d, *J* = 8.0 Hz, 2H), 7.12 – 7.07 (m, 3H), 6.77 (t, *J* = 7.0 Hz, 1H), 3.46 – 3.43 (m, 2H), 3.29 – 3.25 (m, 2H), 2.38 (s, 3H), 2.30 (s, 3H).

**<sup>13</sup>C NMR (126 MHz, CDCl<sub>3</sub>)** δ 145.2, 144.8, 143.4, 137.7, 135.5, 131.2, 130.1, 129.5, 128.0, 127.7, 124.3, 122.6, 117.8, 115.0, 112.8, 53.2, 21.8, 21.3, 17.8.

**IR (KBr)** 2920, 1501, 1404, 1355, 1290, 1232, 1142, 1084, 822, 734 cm<sup>-1</sup>.

**HRMS for C<sub>23</sub>H<sub>23</sub>N<sub>2</sub>O<sub>2</sub>S<sup>+</sup> (M+H)<sup>+</sup>:** calcd. 391.14748, found 391.14713

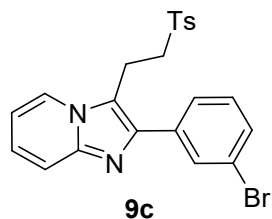

2-(3-bromophenyl)-3-(2-tosylethyl)imidazo[1,2-a]pyridine

**9c** was purified by silica gel chromatography (petroleum ether/ethyl acetate = 2:1 to 1:1).

Yellow solid, mp 181-183 °C.

**<sup>1</sup>H NMR (500 MHz, CDCl<sub>3</sub>)** δ 7.87 (d, *J* = 7.0 Hz, 1H), 7.72 (s, 1H), 7.63 (d, *J* = 8.0 Hz, 2H), 7.50 (d, *J* = 9.0 Hz, 1H), 7.35 (t, *J* = 7.5 Hz, 2H), 7.24 (d, *J* = 8.0 Hz, 2H), 7.14 – 7.10 (m, 2H), 6.79 (t, *J* = 7.0 Hz, 1H), 3.45 – 3.42 (m, 2H), 3.28 – 3.24 (m, 2H), 2.36 (s, 3H).

**<sup>13</sup>C NMR (126 MHz, CDCl<sub>3</sub>)** δ 145.3, 144.9, 141.7, 136.2, 135.3, 131.0, 130.8, 130.2, 127.8, 126.1, 124.8, 123.0, 122.8, 117.9, 115.7, 113.1, 53.1, 21.7, 17.7.

**IR (KBr)** 1592, 1505, 1355, 1298, 1284, 1150, 1086, 891, 807, 731 cm<sup>-1</sup>.

**HRMS for C<sub>22</sub>H<sub>20</sub>BrN<sub>2</sub>O<sub>2</sub>S<sup>+</sup> (M+H)<sup>+</sup>**: calcd. 455.04234, found 455.04208

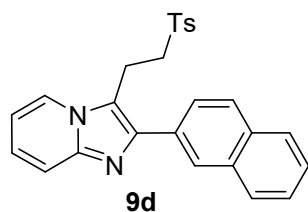

2-(naphthalen-2-yl)-3-(2-tosylethyl)imidazo[1,2-a]pyridine

**9d** was purified by silica gel chromatography (petroleum ether/ethyl acetate = 2:1 to 1:1).

Yellow solid, mp 199-201 °C.

**<sup>1</sup>H NMR (500 MHz, CDCl<sub>3</sub>)** δ 7.97 (s, 1H), 7.90 (d, *J* = 6.5 Hz, 1H), 7.75 (d, *J* = 8.0 Hz, 2H), 7.72 – 7.71 (m, 1H), 7.68 – 7.64 (m, 3H), 7.57 (d, *J* = 9.0 Hz, 1H), 7.42 – 7.41 (m, 2H), 7.21 (d, *J* = 8.0 Hz, 2H), 7.15 (t, *J* = 8.0 Hz, 1H), 6.81 (d, *J* = 7.0 Hz, 1H), 3.57 – 3.54 (m, 2H), 3.32 – 3.29 (m, 2H), 2.35 (s, 3H).

**<sup>13</sup>C NMR (126 MHz, CDCl<sub>3</sub>)** δ 145.3, 145.1, 143.3, 135.5, 133.5, 132.9, 131.5, 130.2, 128.5, 128.4, 128.0, 127.8, 126.9, 126.4, 126.4, 125.8, 124.6, 122.7, 118.0, 115.7, 113.0, 53.3, 21.8, 18.0.

**IR (KBr)** 2923, 1496, 1363, 1299, 1230, 1145, 1083, 889, 861, 757 cm<sup>-1</sup>.

**HRMS for C<sub>26</sub>H<sub>23</sub>N<sub>2</sub>O<sub>2</sub>S<sup>+</sup> (M+H)<sup>+</sup>**: calcd. 427.14748, found 427.14731

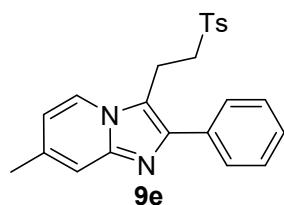

7-methyl-2-phenyl-3-(2-tosylethyl)imidazo[1,2-a]pyridine

**9e** was purified by silica gel chromatography (petroleum ether/ethyl acetate = 2:1 to 1:1).

Yellow solid, mp 195-197 °C.

**<sup>1</sup>H NMR (500 MHz, CDCl<sub>3</sub>)** δ 7.75 (d, *J* = 7.0 Hz, 1H), 7.68 (d, *J* = 8.0 Hz, 2H), 7.48 – 7.46 (m, 2H), 7.29 – 7.22 (m, 6H), 6.63 (dd, *J* = 7.0, 1.0 Hz, 1H), 3.45 – 3.42 (m, 2H), 3.28 – 3.25 (m, 2H), 2.39 (s, 3H), 2.33 (s, 3H).

**<sup>13</sup>C NMR (126 MHz, CDCl<sub>3</sub>)** δ 145.2, 145.1, 142.8, 135.4, 134.2, 130.1, 128.7, 128.0, 127.8, 127.7, 121.9, 116.2, 115.4, 114.6, 53.3, 21.7, 21.3, 17.7.

**IR (KBr)** 2922, 1444, 1359, 1308, 1232, 1140, 1086, 816, 772, 693 cm<sup>-1</sup>.

**HRMS for C<sub>23</sub>H<sub>23</sub>N<sub>2</sub>O<sub>2</sub>S<sup>+</sup> (M+H)<sup>+</sup>:** calcd. 391.14748, found 391.14749

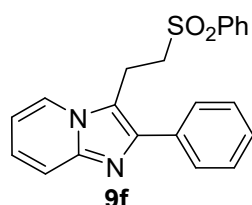

2-phenyl-3-(2-(phenylsulfonyl)ethyl)imidazo[1,2-a]pyridine

**9f** was purified by silica gel chromatography (petroleum ether/ethyl acetate = 2:1 to 1:1).

Yellow solid, mp 180-182 °C.

**<sup>1</sup>H NMR (500 MHz, CDCl<sub>3</sub>)** δ 7.86 (d, *J* = 8.0 Hz, 1H), 7.78 (d, *J* = 7.5 Hz, 2H), 7.59 (d, *J* = 7.5 Hz, 1H), 7.52 (d, *J* = 9.0 Hz, 1H), 7.48 – 7.45 (m, 4H), 7.29 – 7.22 (m, 3H), 7.13 – 7.10 (m, 1H), 6.80 – 6.77 (m, 1H), 3.49 – 3.46 (m, 2H), 3.31- 3.27 (m, 2H).

**<sup>13</sup>C NMR (126 MHz, CDCl<sub>3</sub>)** δ 144.9, 143.4, 138.4, 134.1, 134.0, 129.5, 128.8, 128.0, 127.9, 124.5, 122.6, 117.9, 115.1, 112.9, 53.1, 17.7.

**IR (KBr)** 2921, 1597, 1447, 1358, 1295, 1235, 1083, 804, 731 cm<sup>-1</sup>.

**HRMS for C<sub>21</sub>H<sub>19</sub>N<sub>2</sub>O<sub>2</sub>S<sup>+</sup> (M+H)<sup>+</sup>:** calcd. 363.11617, found 363.11624

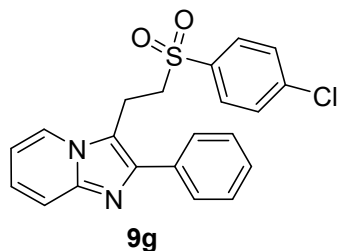

3-(2-((4-chlorophenyl)sulfonyl)ethyl)-2-phenylimidazo[1,2-a]pyridine

**9g** was purified by silica gel chromatography (petroleum ether/ethyl acetate = 2:1 to 1:1).

Yellow solid, mp 203-205 °C.

**<sup>1</sup>H NMR (500 MHz, CDCl<sub>3</sub>)** δ 7.89 (d, *J* = 7.0 Hz, 1H), 7.67 (d, *J* = 8.5 Hz, 2H), 7.54 (d, *J* = 9.0 Hz, 1H), 7.49 – 7.47 (m, 2H), 7.41 (d, *J* = 8.5 Hz, 2H), 7.33 – 7.28 (m, 3H), 7.16 – 7.13 (m, 1H), 6.82 (t, *J* = 6.5 Hz, 1H), 3.52 – 3.48 (m, 2H), 3.31 – 3.28 (m, 2H).

**<sup>13</sup>C NMR (126 MHz, CDCl<sub>3</sub>)** δ 144.9, 143.5, 141.0, 136.9, 134.0, 129.8, 129.4, 128.9, 128.1, 127.9, 124.5, 122.6, 118.0, 115.0, 113.0, 53.3, 17.7.

**IR (KBr)** 2920, 1581, 1394, 1358, 1321, 1147, 1086, 836, 766 cm<sup>-1</sup>.

**HRMS for C<sub>21</sub>H<sub>18</sub>ClN<sub>2</sub>O<sub>2</sub>S<sup>+</sup> (M+H)<sup>+</sup>:** calcd. 397.07720, found 397.07721

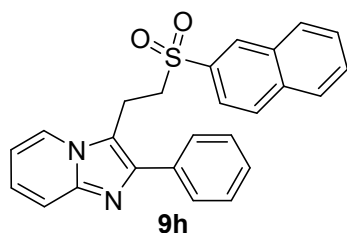

3-(2-(naphthalen-2-ylsulfonyl)ethyl)-2-phenylimidazo[1,2-a]pyridine

**9h** was purified by silica gel chromatography (petroleum ether/ethyl acetate = 2:1 to 1:1).

Yellow solid, mp 176-178 °C.

**<sup>1</sup>H NMR (500 MHz, CDCl<sub>3</sub>)** δ 8.30 (s, 1H), 7.85 – 7.80 (m, 4H), 7.65 (dd, *J* = 8.5, 1.5 Hz, 1H), 7.57 (t, *J* = 7.5 Hz, 1H), 7.51 (t, *J* = 7.5 Hz, 1H), 7.42 – 7.37 (m, 3H), 7.13 – 7.08 (m, 3H), 7.02 (t, *J* = 7.5 Hz, 1H), 6.71 (t, *J* = 6.5 Hz, 1H), 3.48 – 3.44 (m, 2H), 3.35 – 3.32 (m, 2H).

**<sup>13</sup>C NMR (126 MHz, CDCl<sub>3</sub>)** δ 144.7, 143.2, 135.3, 135.1, 133.9, 132.0, 129.8, 129.7, 129.5, 129.5, 128.6, 128.0, 127.9, 127.8, 127.7, 124.4, 122.6, 122.3, 117.7, 115.1, 112.7, 53.1, 17.7.

**IR (KBr)** 2995, 1502, 1449, 1361, 1237, 1145, 1128, 1071, 817, 734 cm<sup>-1</sup>.

**HRMS for C<sub>25</sub>H<sub>21</sub>N<sub>2</sub>O<sub>2</sub>S<sup>+</sup> (M+H)<sup>+</sup>**: calcd. 413.13183, found 413.13150

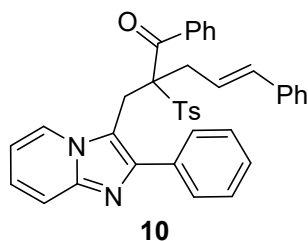

(E)-1,5-diphenyl-2-((2-phenylimidazo[1,2-a]pyridin-3-yl)methyl)-2-tosylpent-4-en-1-one

Yellow solid, mp 79-81 °C.

**10** was purified by silica gel chromatography (petroleum ether/ethyl acetate = 2:1 to 1:1).

**<sup>1</sup>H NMR (500 MHz, CDCl<sub>3</sub>)** δ 8.40 (d, *J* = 6.5 Hz, 1H), 7.77 (d, *J* = 7.0 Hz, 2H), 7.46 (d, *J* = 9.0 Hz, 1H), 7.37 – 7.32 (m, 3H), 7.28 – 7.22 (m, 3H), 7.19 – 7.14 (m, 3H), 6.99 – 6.95 (m, 7H), 6.88 (d, *J* = 8.0 Hz, 2H), 6.70 (t, *J* = 7.0 Hz, 1H), 5.86 (d, *J* = 16.0 Hz, 1H), 5.35 – 5.29 (m, 1H), 4.43 (s, 2H), 3.75 (d, *J* = 6.5 Hz, 2H), 2.22 (s, 3H).

**<sup>13</sup>C NMR (126 MHz, CDCl<sub>3</sub>)** δ 165.9, 144.4, 143.9, 143.2, 138.8, 135.7, 135.2, 134.8, 131.4, 130.3, 130.2, 129.1, 129.0, 128.6, 128.5, 128.2, 127.9, 127.5, 126.9, 126.7, 124.6, 123.7, 122.8, 118.9, 117.4, 117.0, 112.0, 70.2, 22.7, 21.5

**IR (KBr)** 1612, 1590, 1488, 1306, 1250, 1149, 1126, 1070, 965, 772 cm<sup>-1</sup>.

**HRMS for C<sub>38</sub>H<sub>33</sub>N<sub>2</sub>O<sub>3</sub>S<sup>+</sup> (M+H)<sup>+</sup>**: calcd. 597.22064, found .597.22089

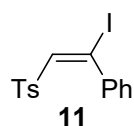

(E)-1-((2-iodo-2-phenylvinyl)sulfonyl)-4-methylbenzene<sup>2</sup>

Yellow solid, mp 78-80 °C.

**<sup>1</sup>H NMR (500 MHz, CDCl<sub>3</sub>)** δ 7.44 (d, *J* = 8.0 Hz, 2H), 7.36 (s, 1H), 7.30 – 7.25 (m, 3H), 7.23 – 7.21



(m, 2H), 7.17 (d,  $J = 8.5$  Hz, 2H), 2.37 (s, 3H).

$^{13}\text{C}$  NMR (126 MHz,  $\text{CDCl}_3$ )  $\delta$  144.6, 141.3, 139.7, 137.3, 129.8, 129.7, 128.0, 127.9, 127.7, 114.3, 21.7.

IR (KBr): 2922, 2179, 1584, 1441, 1326, 1140, 1082, 858, 766, 748  $\text{cm}^{-1}$ .

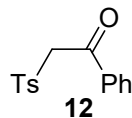

1-phenyl-2-tosylethan-1-one<sup>3</sup>

Yellow solid, mp 99-101 °C.

$^1\text{H}$  NMR (500 MHz,  $\text{CDCl}_3$ )  $\delta$  7.93 – 7.91 (m, 2H), 7.75 (d,  $J = 8.5$  Hz, 2H), 7.58 (t,  $J = 8.5$  Hz, 1H), 7.44 (t,  $J = 8.0$  Hz, 2H), 7.30 (d,  $J = 8.0$  Hz, 2H), 4.73 (s, 2H), 2.41 (s, 3H).

$^{13}\text{C}$  NMR (126 MHz,  $\text{CDCl}_3$ )  $\delta$  188.2, 145.3, 135.8, 135.7, 134.3, 129.8, 129.3, 128.8, 128.6, 63.5, 21.7.

IR (KBr): 2923, 1676, 1595, 1447, 1317, 1269, 1147, 992, 823, 736  $\text{cm}^{-1}$ .

## 6 X-ray diffraction analysis of compound 4j

Sample preparation:

The method for crystal growth is slow volatilization using petroleum ether (PE)-ethyl acetate (EA) mixture as a solvent.

Crystal measurement for compound 4j:

A specimen of  $\text{C}_{29}\text{H}_{23}\text{N}_3\text{O}_5\text{S}$ , approximate dimensions 0.150 mm x 0.200 mm x 0.250 mm, was used for the X-ray crystallographic analysis. The X-ray intensity data were measured ( $\lambda = 0.71073$  Å).

The integration of the data using a triclinic unit cell yielded a total of 31127 reflections to a maximum  $\theta$  angle of 27.55° (0.77 Å resolution), of which 5555 were independent (average redundancy 5.603, completeness = 97.9%,  $R_{\text{int}} = 6.02\%$ ,  $R_{\text{sig}} = 4.41\%$ ) and 4432 (79.78%) were greater than  $2\sigma(F^2)$ . The final cell constants of  $a = 7.1153(4)$  Å,  $b = 12.1904(7)$  Å,  $c = 14.8931(8)$  Å,  $\alpha = 79.211(2)^\circ$ ,  $\beta = 77.257(2)^\circ$ ,  $\gamma = 80.078(2)^\circ$ , volume = 1226.09(12) Å<sup>3</sup>, are based upon the refinement of the XYZ-centroids of reflections above 20  $\sigma(I)$ . The calculated minimum and maximum transmission coefficients (based on crystal size) are 0.9560 and 0.9740.

The structure was solved and refined using the Bruker SHELXTL Software Package, using the space group P -1, with  $Z = 2$  for the formula unit,  $\text{C}_{29}\text{H}_{23}\text{N}_3\text{O}_5\text{S}$ . The final anisotropic full-matrix least-squares refinement on  $F^2$  with 344 variables converged at  $R1 = 4.23\%$ , for the observed data and  $wR2 = 11.50\%$  for all data. The goodness-of-fit was 1.030. The largest peak in the final difference electron density synthesis was 0.345  $e^{-}/\text{Å}^3$  and the largest hole was -0.380  $e^{-}/\text{Å}^3$  with an RMS deviation of 0.054  $e^{-}/\text{Å}^3$ . On the basis of the final model, the calculated density was 1.424  $\text{g}/\text{cm}^3$  and  $F(000)$ , 548  $e^{-}$ .

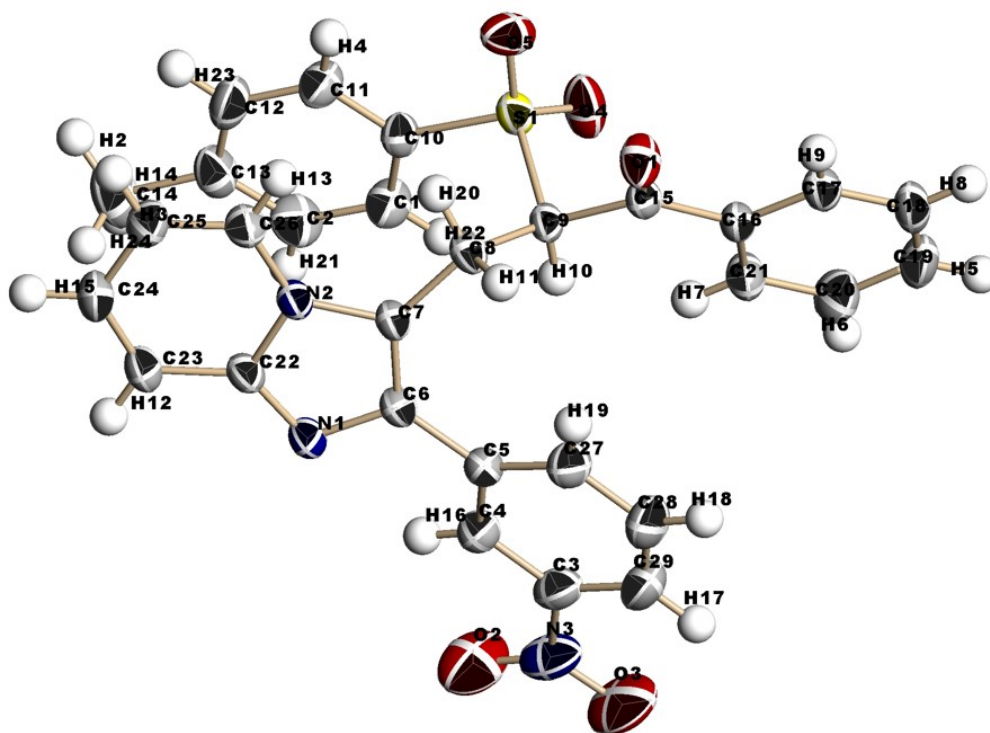

Plots are drawn at 50% probability level.

**Table S3.** Crystal data and structure refinement for **4j**

|                                 |                                                                                                                |
|---------------------------------|----------------------------------------------------------------------------------------------------------------|
| Identification code             | 20220910ge1                                                                                                    |
| Chemical formula                | C <sub>29</sub> H <sub>23</sub> N <sub>3</sub> O <sub>5</sub> S                                                |
| Formula weight                  | 525.56 g/mol                                                                                                   |
| Temperature                     | 294(2) K                                                                                                       |
| Wavelength                      | 0.71073 Å                                                                                                      |
| Crystal size                    | 0.150 x 0.200 x 0.250 mm                                                                                       |
| Crystal system                  | triclinic                                                                                                      |
| Space group                     | P -1                                                                                                           |
| Unit cell dimensions            | a = 7.1153(4) Å    α = 79.211(2)°<br>b = 12.1904(7) Å    β = 77.257(2)°<br>c = 14.8931(8) Å    γ = 14.8931(8)° |
| Volume                          | 1226.09(12) Å <sup>3</sup>                                                                                     |
| Z                               | 2                                                                                                              |
| Density (calculated)            | 1.424 g/cm <sup>3</sup>                                                                                        |
| Absorption coefficient          | 0.180 mm <sup>-1</sup>                                                                                         |
| F(000)                          | 548                                                                                                            |
| Theta range for data collection | 2.39 to 27.55°                                                                                                 |
| Index ranges                    | -9 ≤ h ≤ 9, -15 ≤ k ≤ 15, -18 ≤ l ≤ 19                                                                         |
| Reflections collected           | 31127                                                                                                          |
| Independent reflections         | 5555 [R(int) = 0.0602]                                                                                         |
| Max. and min. transmission      | 0.9740 and 0.9560                                                                                              |
| Structure solution technique    | direct methods                                                                                                 |
| Structure solution program      | SHELXT 2018/2 (Sheldrick, 2018)                                                                                |

|                                   |                                                                                                                         |
|-----------------------------------|-------------------------------------------------------------------------------------------------------------------------|
| Refinement method                 | Full-matrix least-squares on F <sup>2</sup>                                                                             |
| Refinement program                | SHELXL-2018/3 (Sheldrick, 2018)                                                                                         |
| Function minimized                | $\Sigma w(F_o^2 - F_c^2)^2$                                                                                             |
| Data / restraints / parameters    | 5555 / 0 / 344                                                                                                          |
| Goodness-of-fit on F <sup>2</sup> | 1.030                                                                                                                   |
| $\Delta/\sigma_{\max}$            | 0.001                                                                                                                   |
| Final R indices                   | 4432 data; I>2 $\sigma$ (I) R1 = 0.0423, wR2 = 0.1072<br>all data R1 = 0.0580, wR2 = 0.1150                             |
| Weighting scheme                  | w=1/[ $\sigma^2(F_o^2)+(0.0647P)^2+0.1359P$ ]<br>where P=(F <sub>o</sub> <sup>2</sup> +2F <sub>c</sub> <sup>2</sup> )/3 |
| Largest diff. peak and hole       | 0.345 and -0.380 eÅ <sup>-3</sup>                                                                                       |
| R.M.S. deviation from mean        | 0.054 eÅ <sup>-3</sup>                                                                                                  |

#### Reference:

- (1) Mohan, D. C.; Donthiri, R. R.; Rao, S. N.; Adimurthya, S. Copper(I) iodide-catalysed aerobic oxidative synthesis of imidazo[1,2-a]pyridines from 2-aminopyridines and methyl ketones, *Adv. Synth. Catal.* **2013**, 355, 2217-2221.
- (2) Zhou, C.; Zeng, X. Iodosulfonylation of alkynes under ultrasound irradiation, *Synthesis*, **2021**, 53, 4614-4620.
- (3) Reddy, R. J.; Kumar, J. J.; Kumari, A. H. Unprecedented reactivity of  $\beta$ -iodovinyl sulfones: an efficient synthesis of  $\beta$ -keto sulfones and  $\beta$ -keto thiosulfones. *Eur. J. Org. Chem.*, **2019**, 3771-3775.

## 7 Copies of $^1\text{H}$ and $^{13}\text{C}$ NMR Spectra

$^1\text{H}$  NMR (500 MHz,  $\text{CDCl}_3$ ) of **4a**

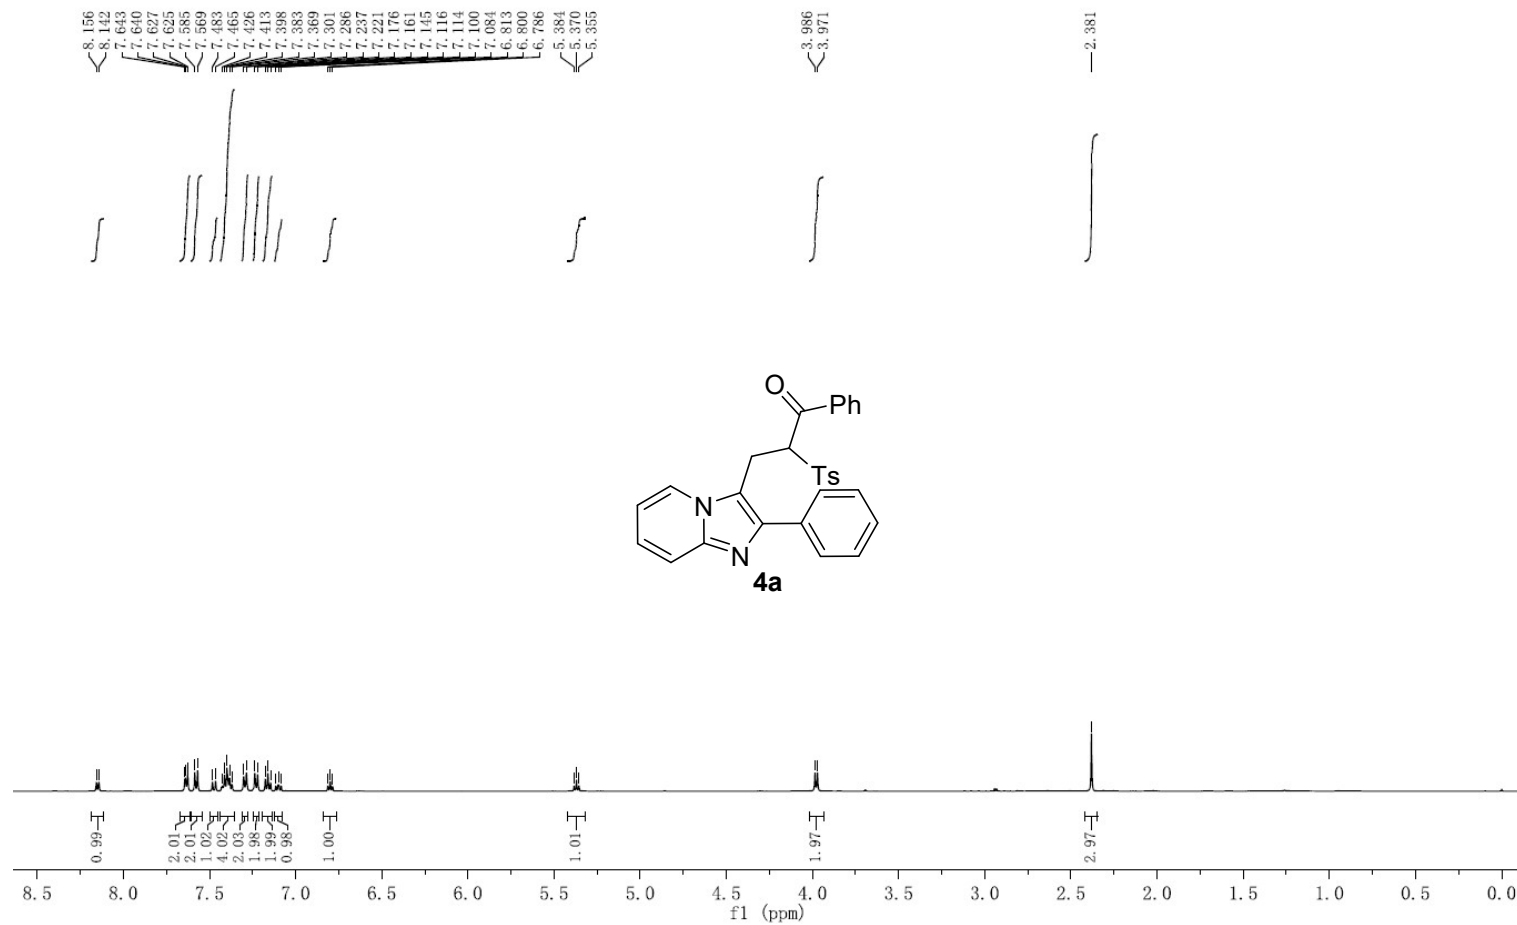

$^{13}\text{C}$  NMR (126 MHz,  $\text{CDCl}_3$ ) of **4a**

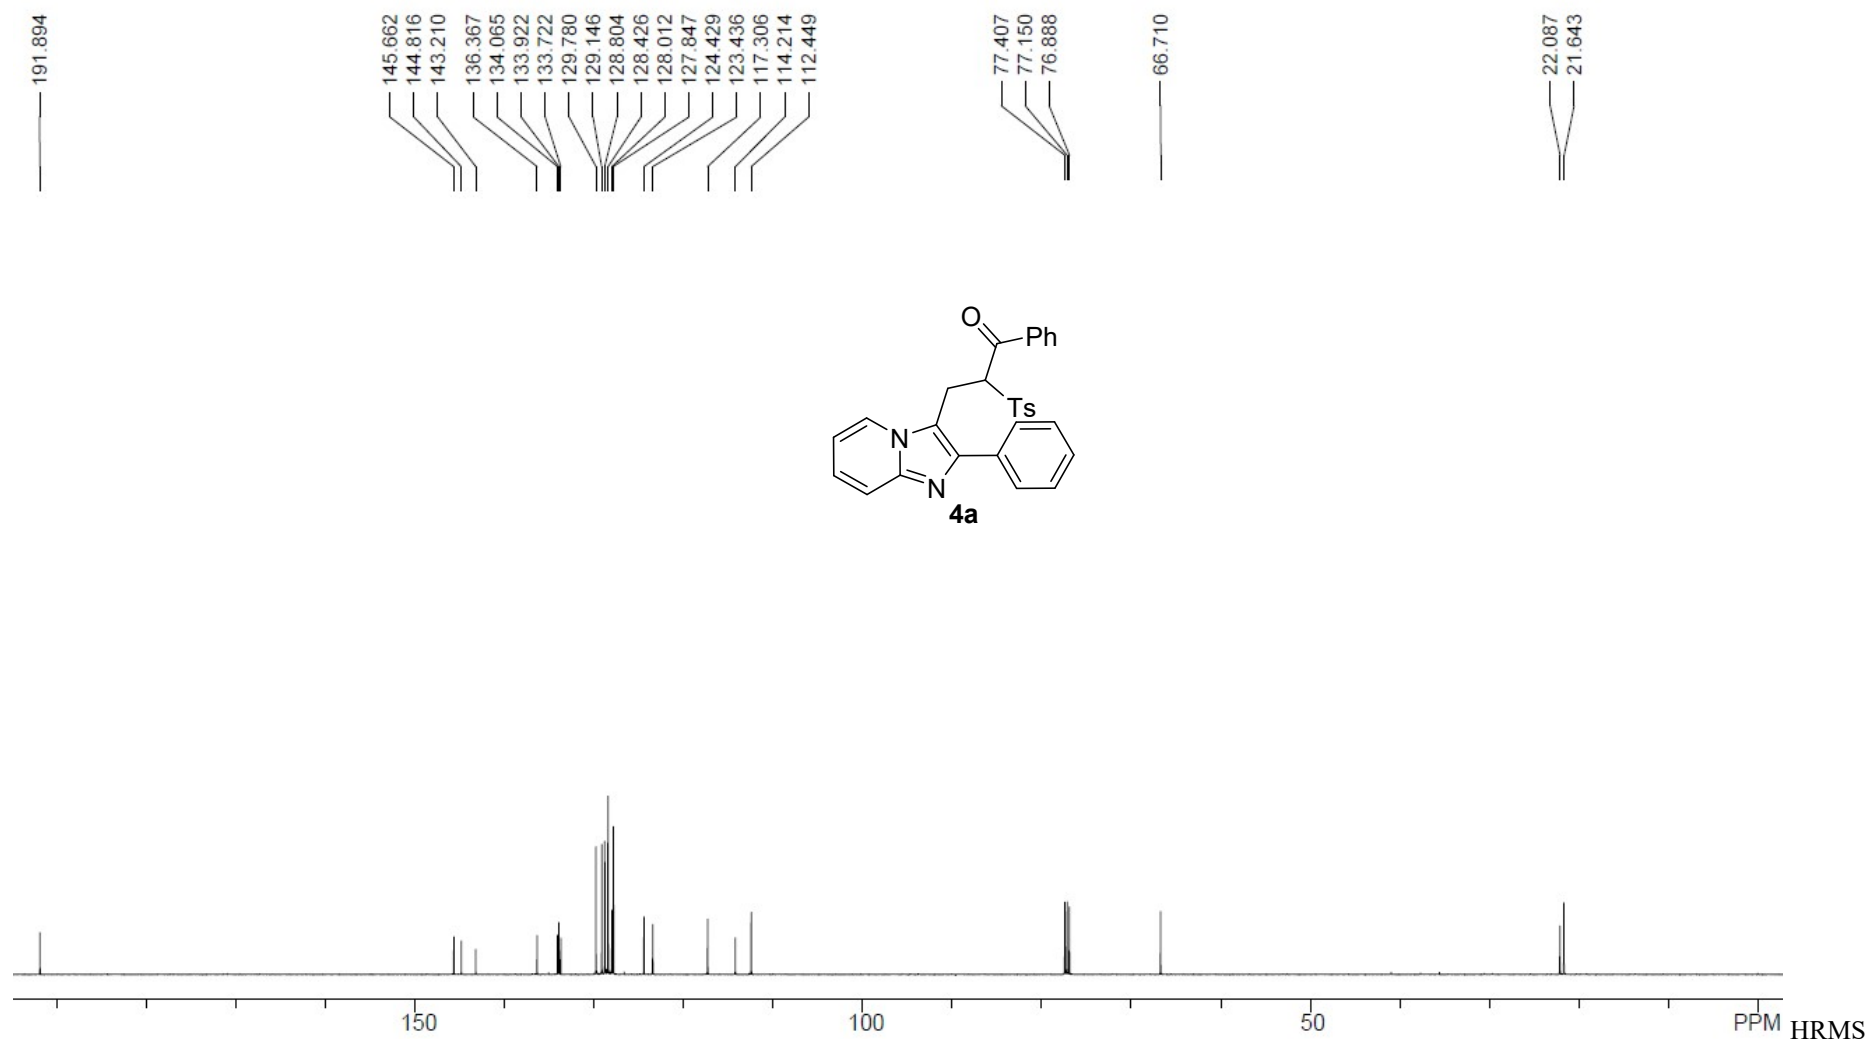

(ESI) of **4a**

ms2 133 4-2000\_220428144545 #14 RT: 0.06 AV: 1 NL: 7.22E8  
T: FTMS + p ESI Full lock ms [100.0000-1500.0000]

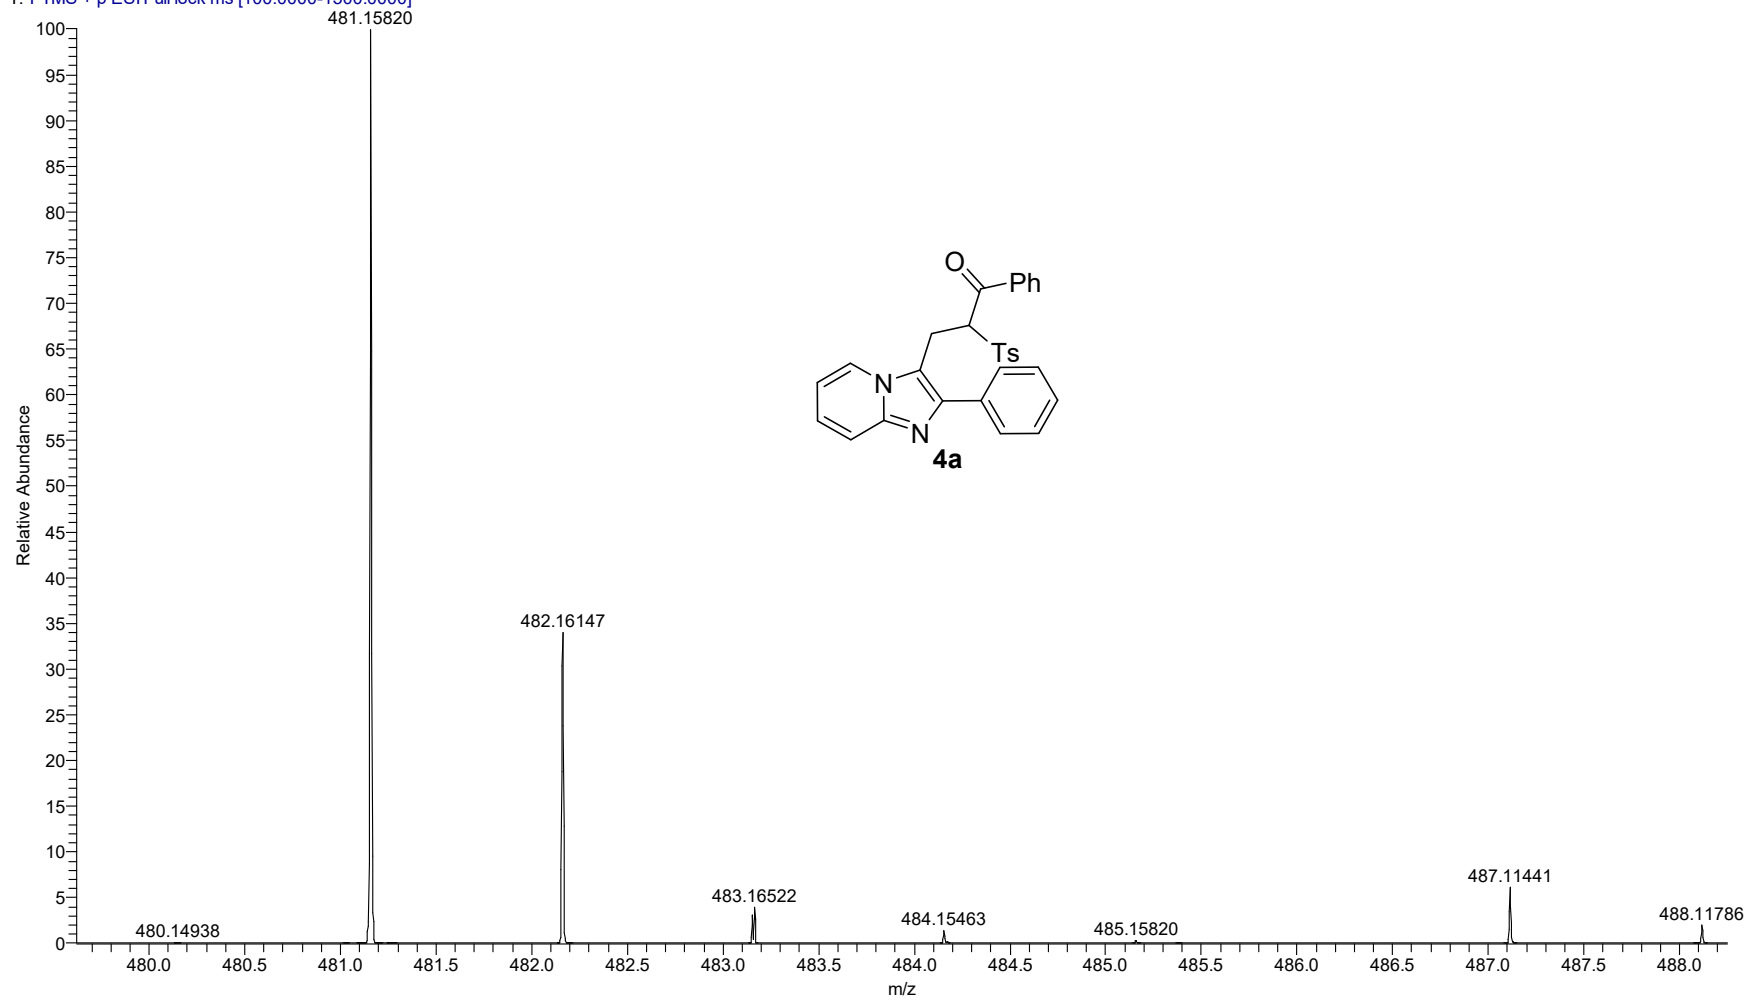

<sup>1</sup>H NMR (500 MHz, CDCl<sub>3</sub>) of **4b**

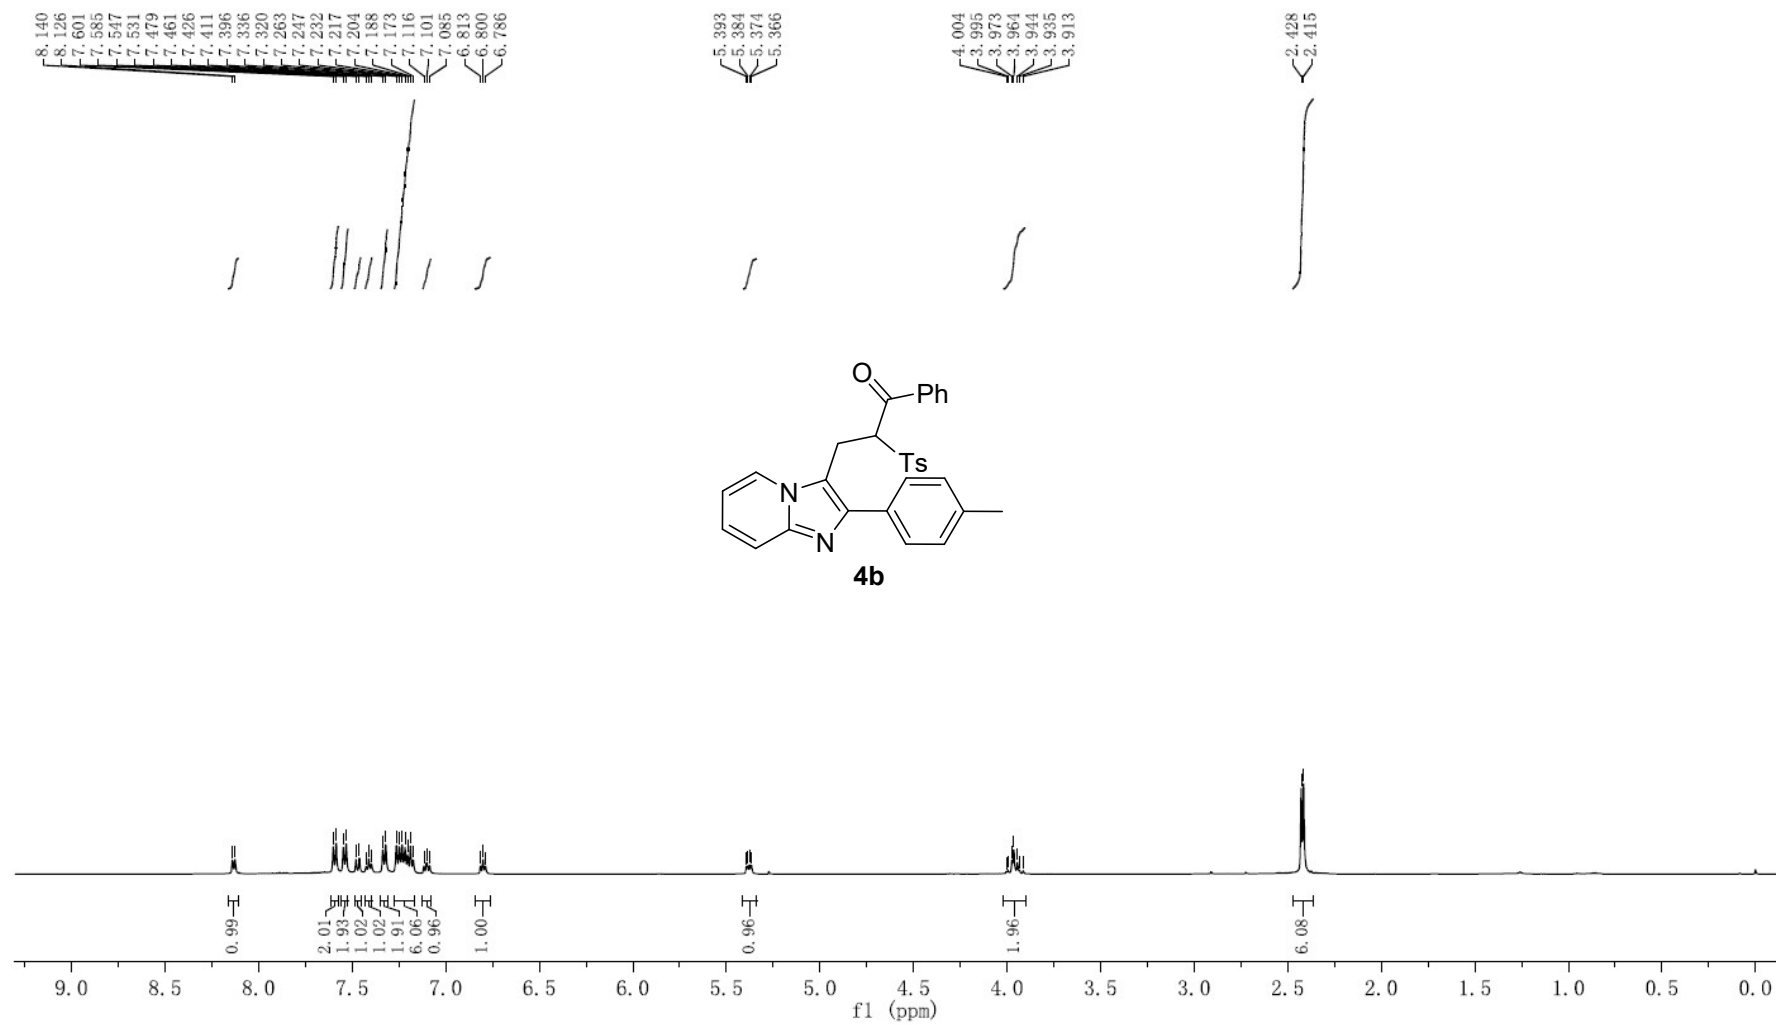

$^{13}\text{C}$  NMR (126 MHz,  $\text{CDCl}_3$ ) of **4b**

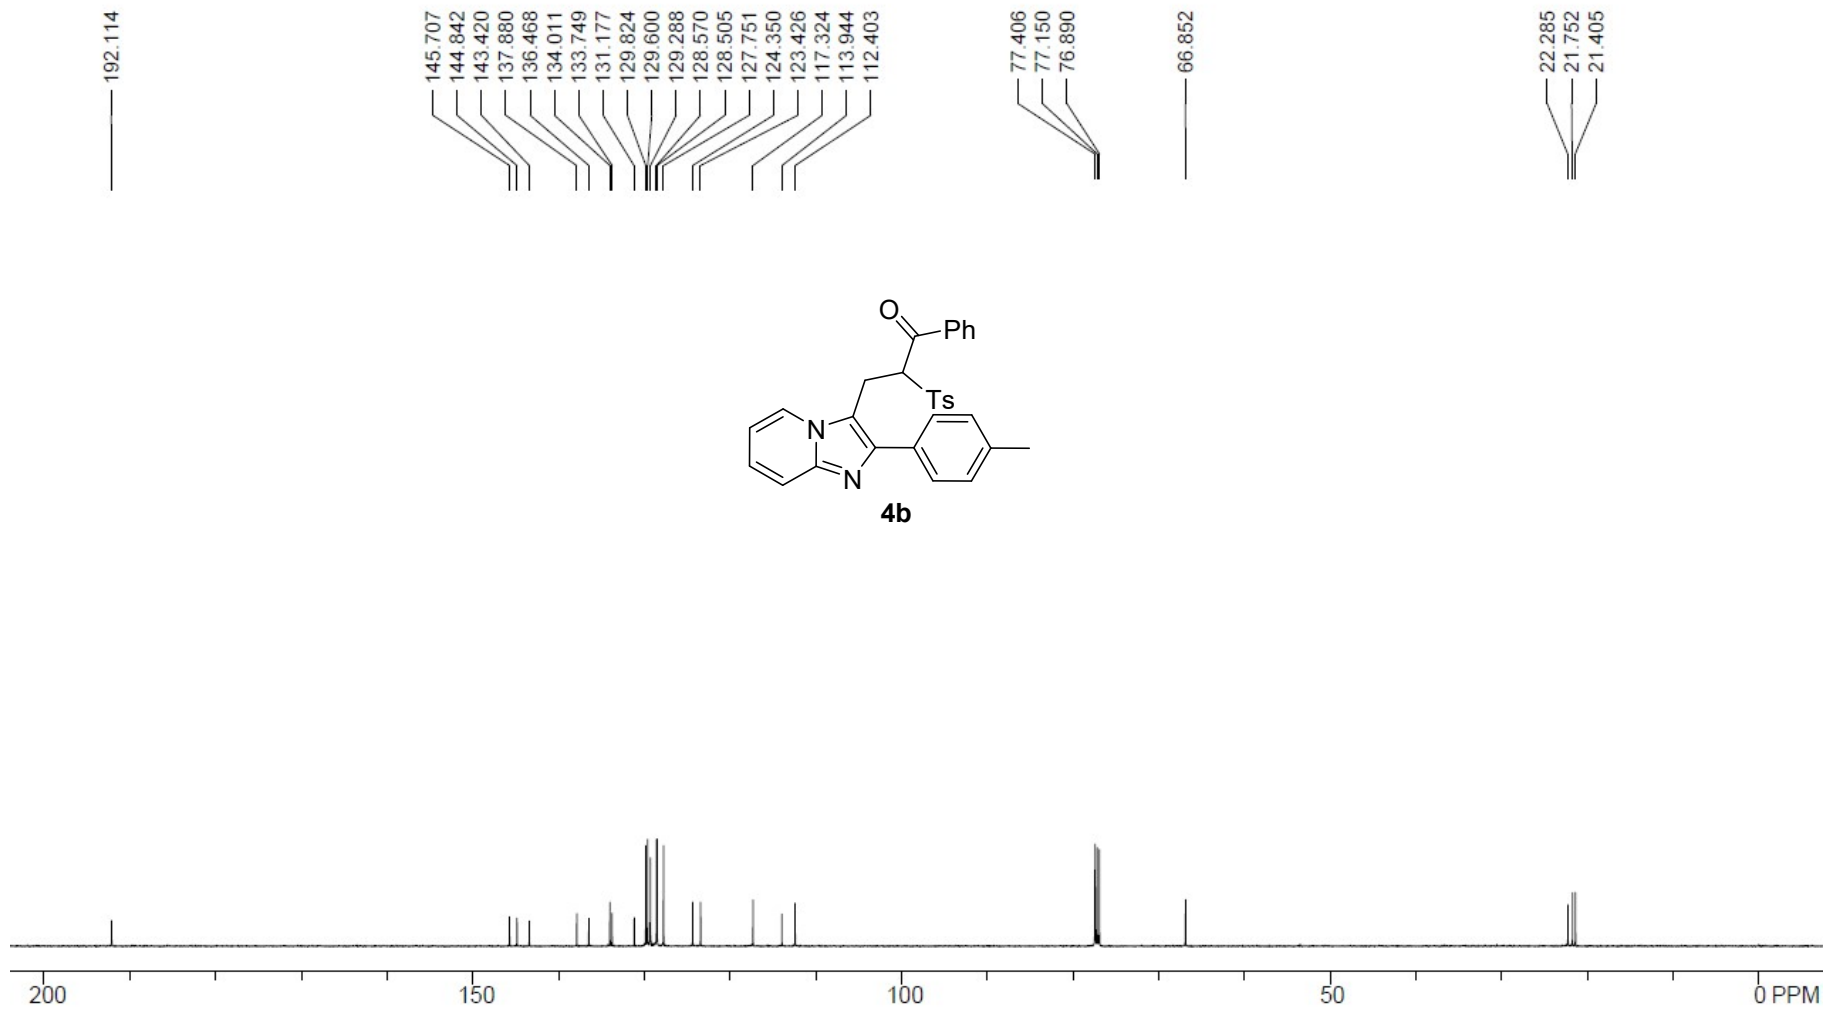



$^1\text{H}$  NMR (500 MHz,  $\text{CDCl}_3$ ) of **4c**

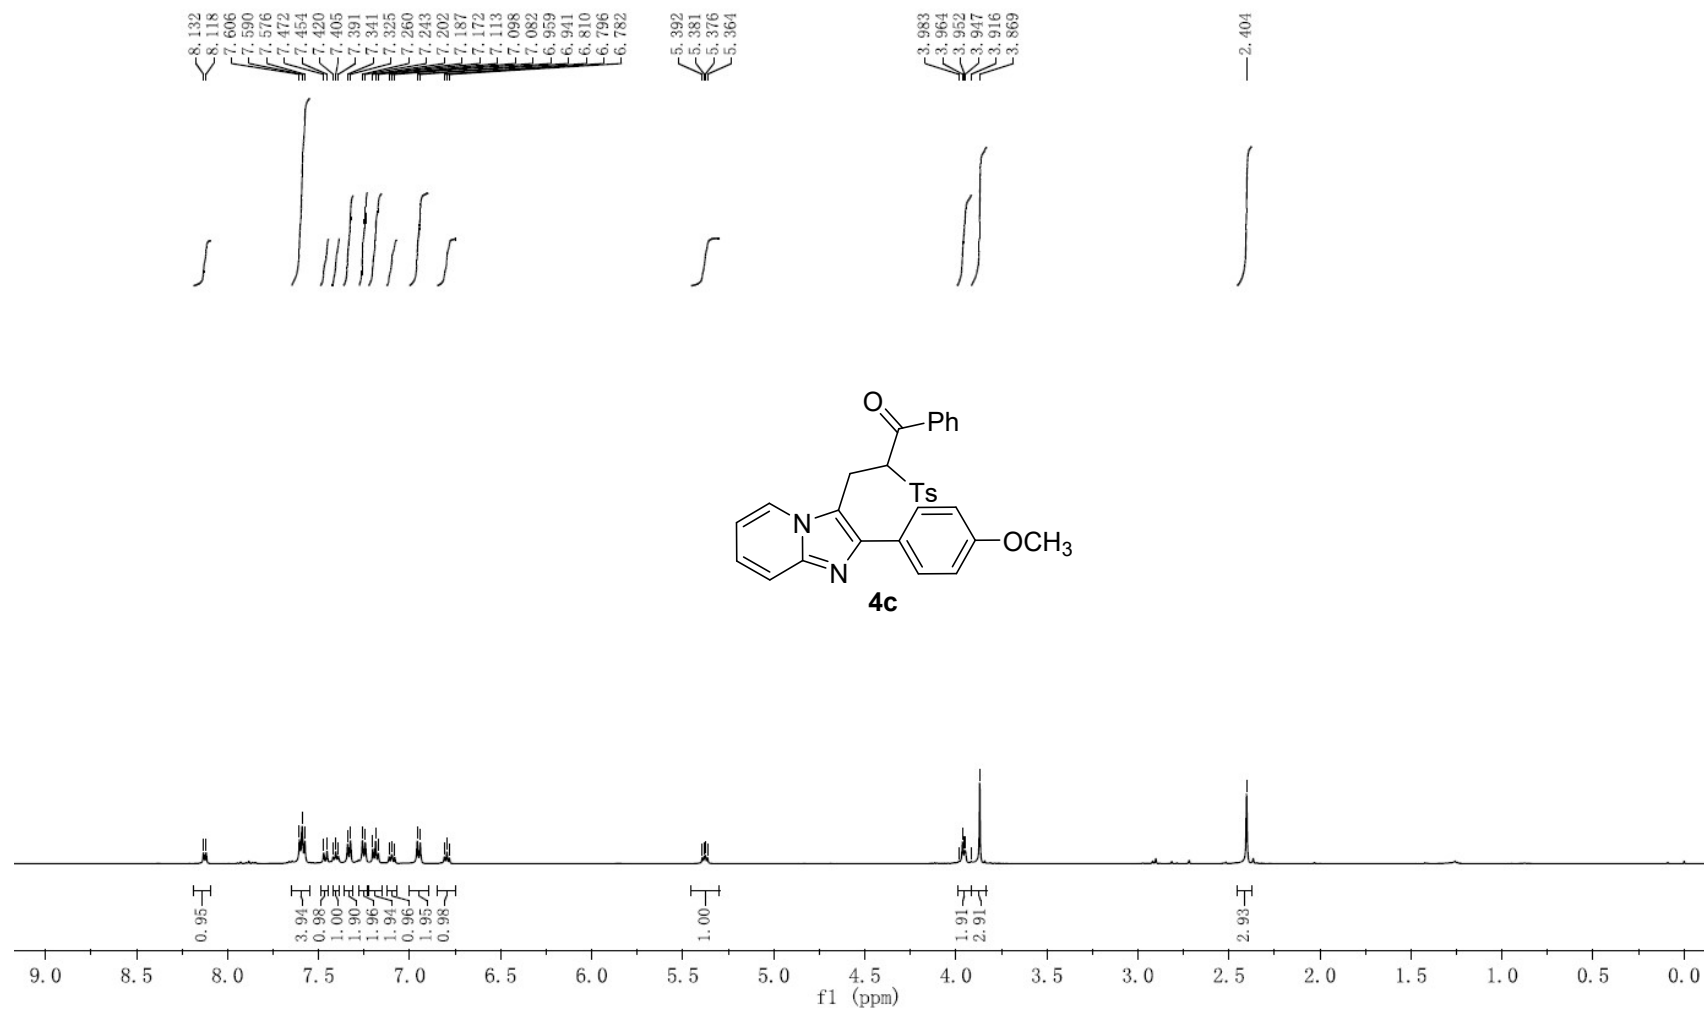

$^{13}\text{C}$  NMR (126 MHz,  $\text{CDCl}_3$ ) of **4c**

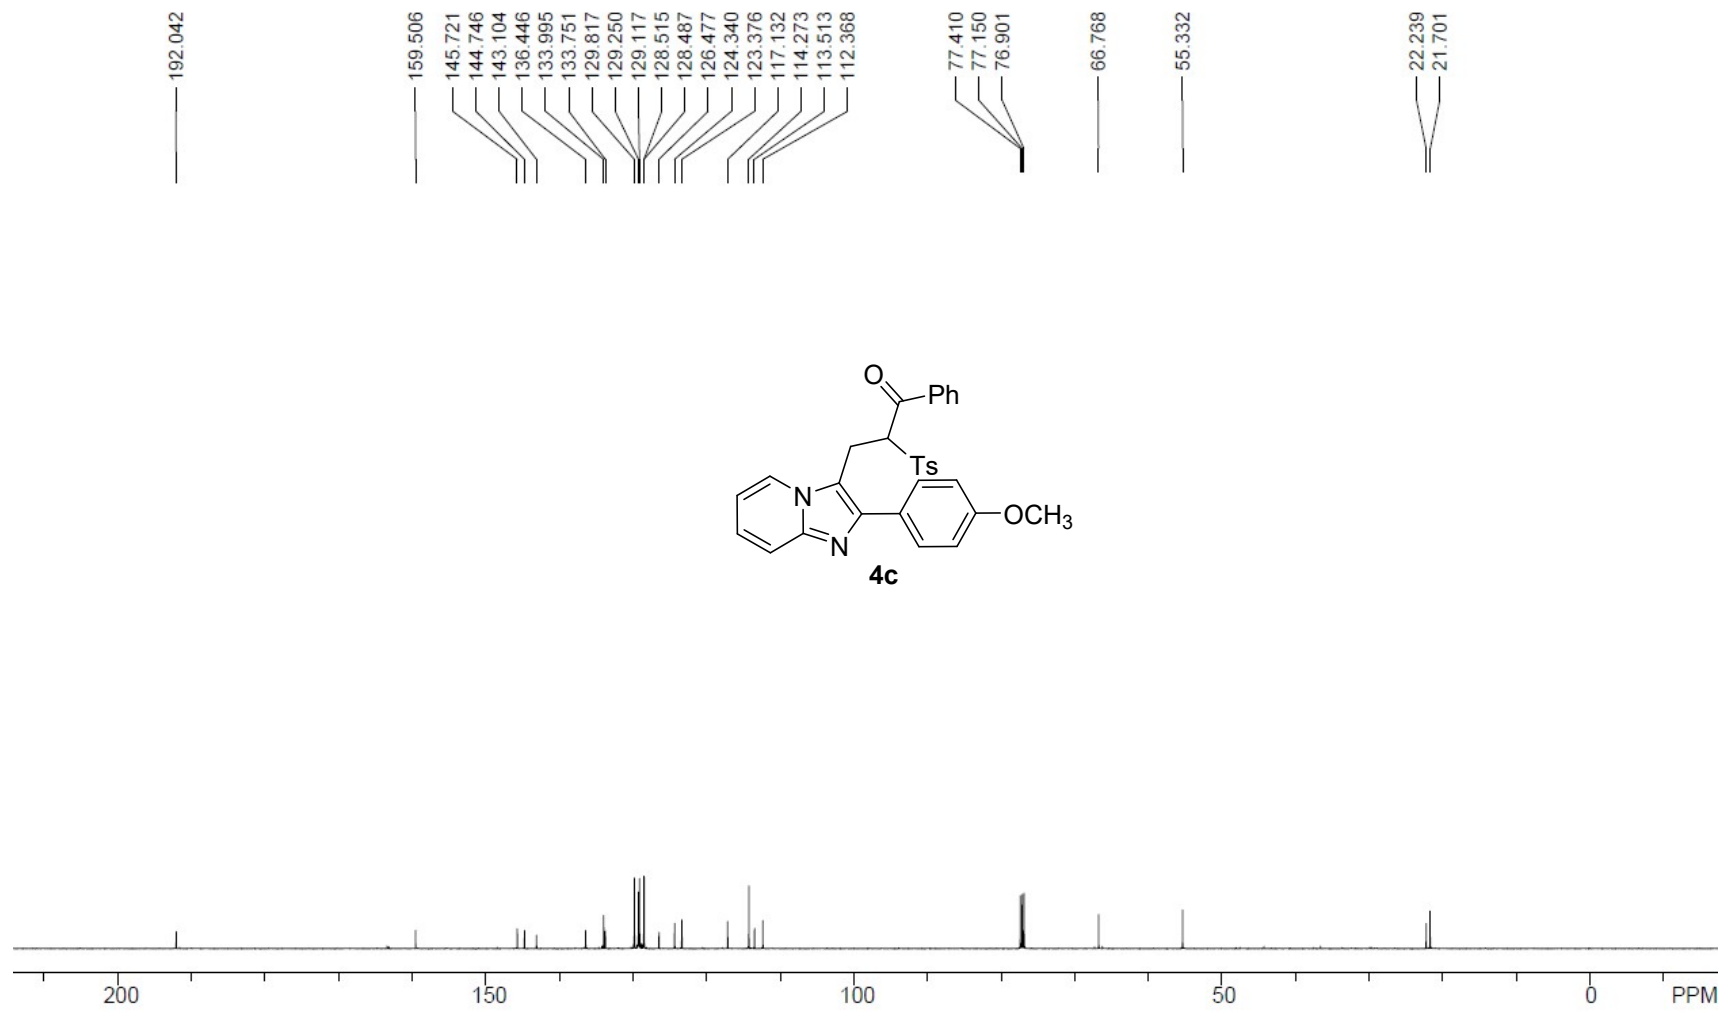

$^1\text{H}$  NMR (500 MHz,  $\text{CDCl}_3$ ) of **4d**

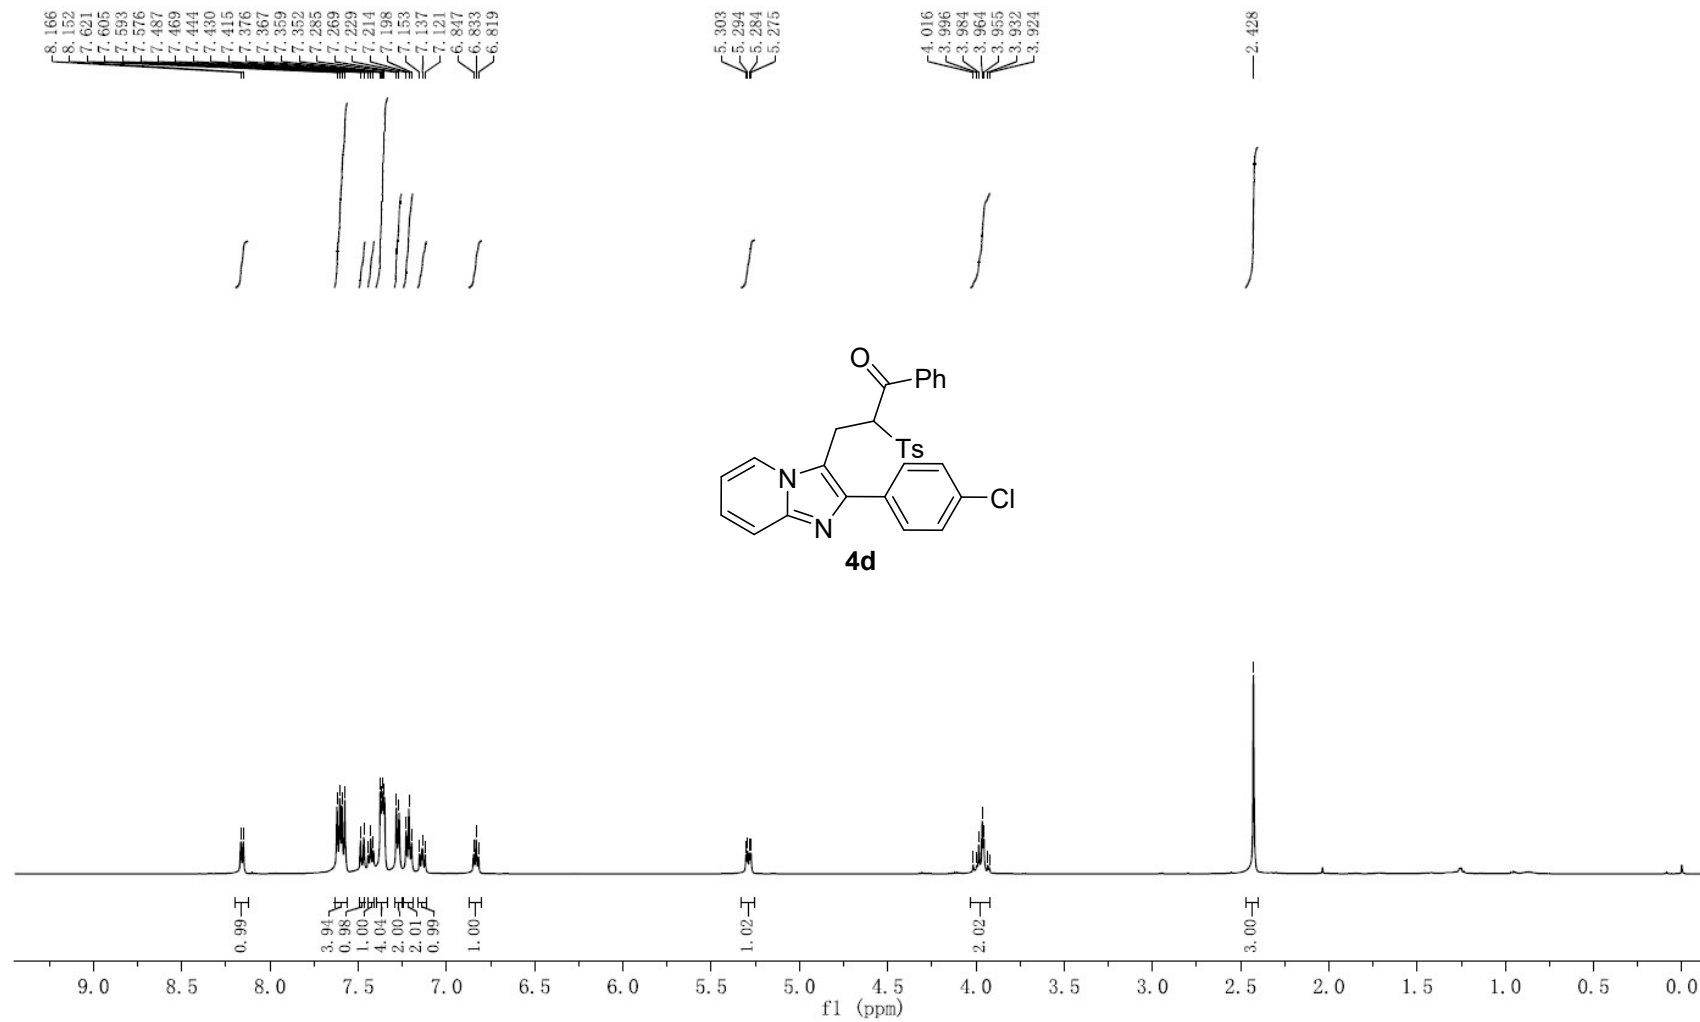

$^{13}\text{C}$  NMR (126 MHz,  $\text{CDCl}_3$ ) of **4d**

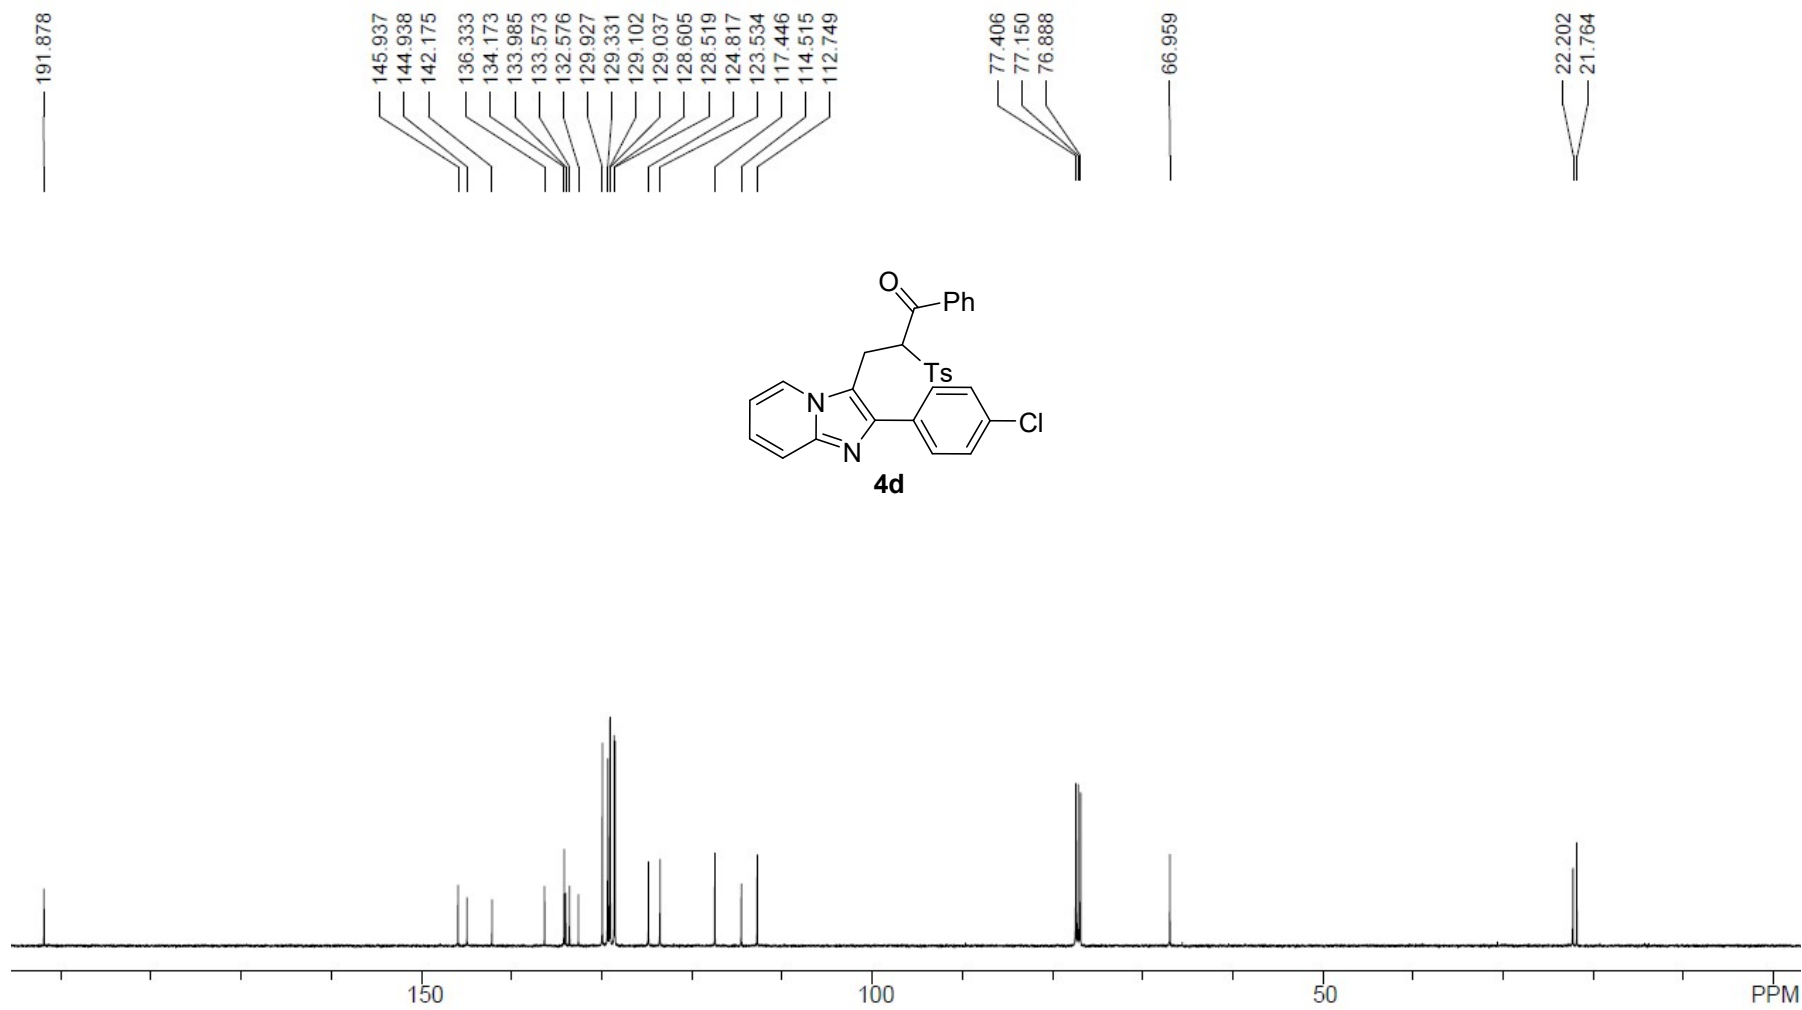

<sup>1</sup>H NMR (500 MHz, CDCl<sub>3</sub>) of **4e**

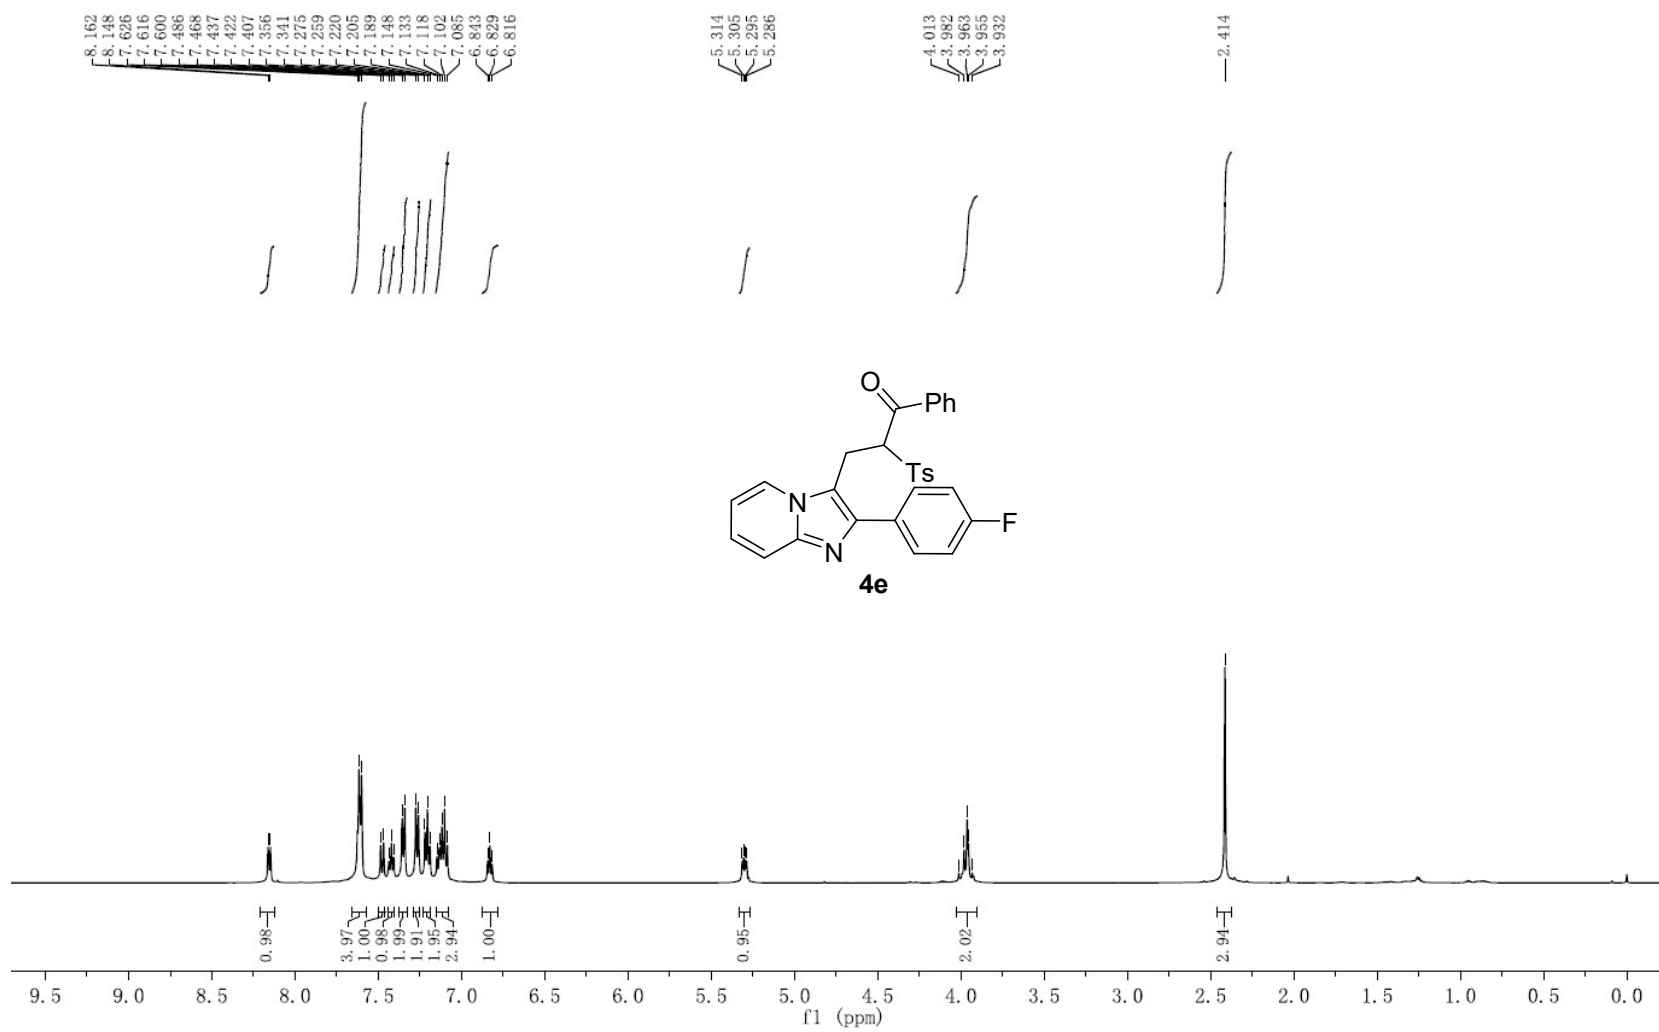

$^{13}\text{C}$  NMR (126 MHz,  $\text{CDCl}_3$ ) of **4e**

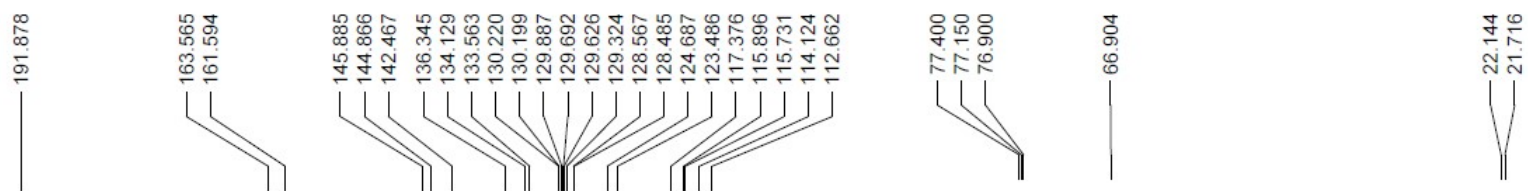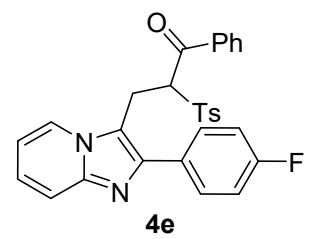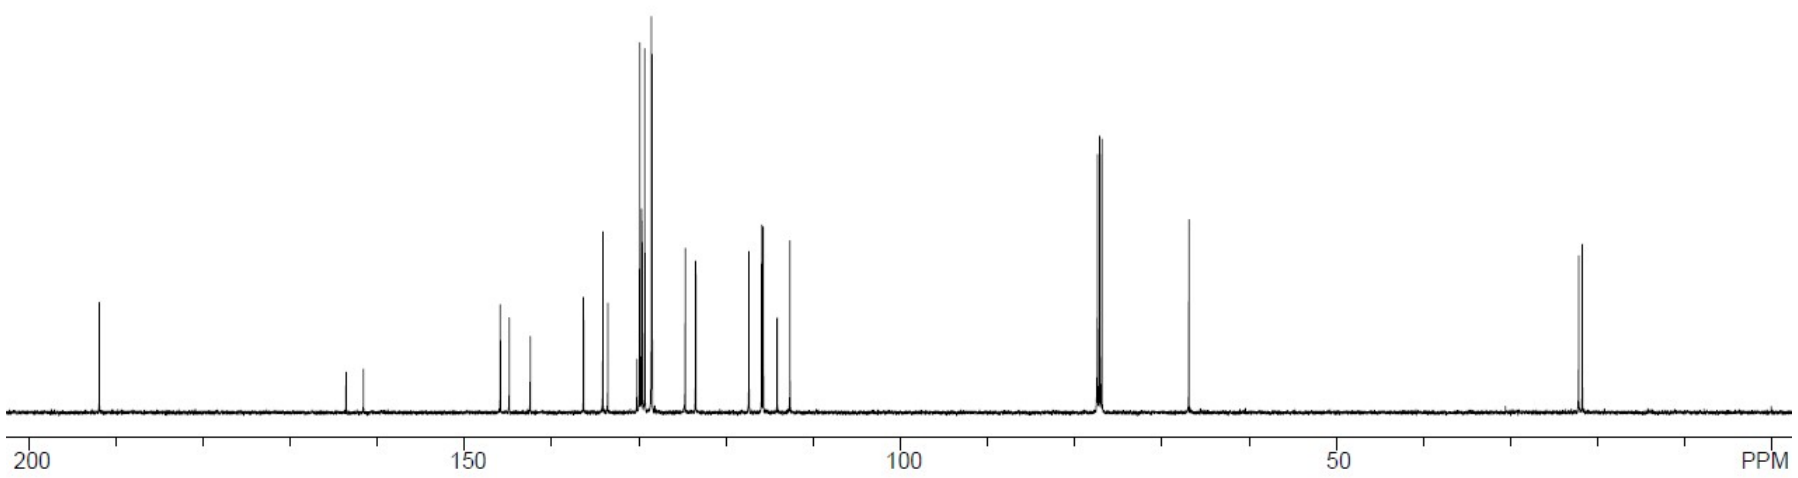

$^{19}\text{F}$  NMR (471 MHz,  $\text{CDCl}_3$ ) of **4e**

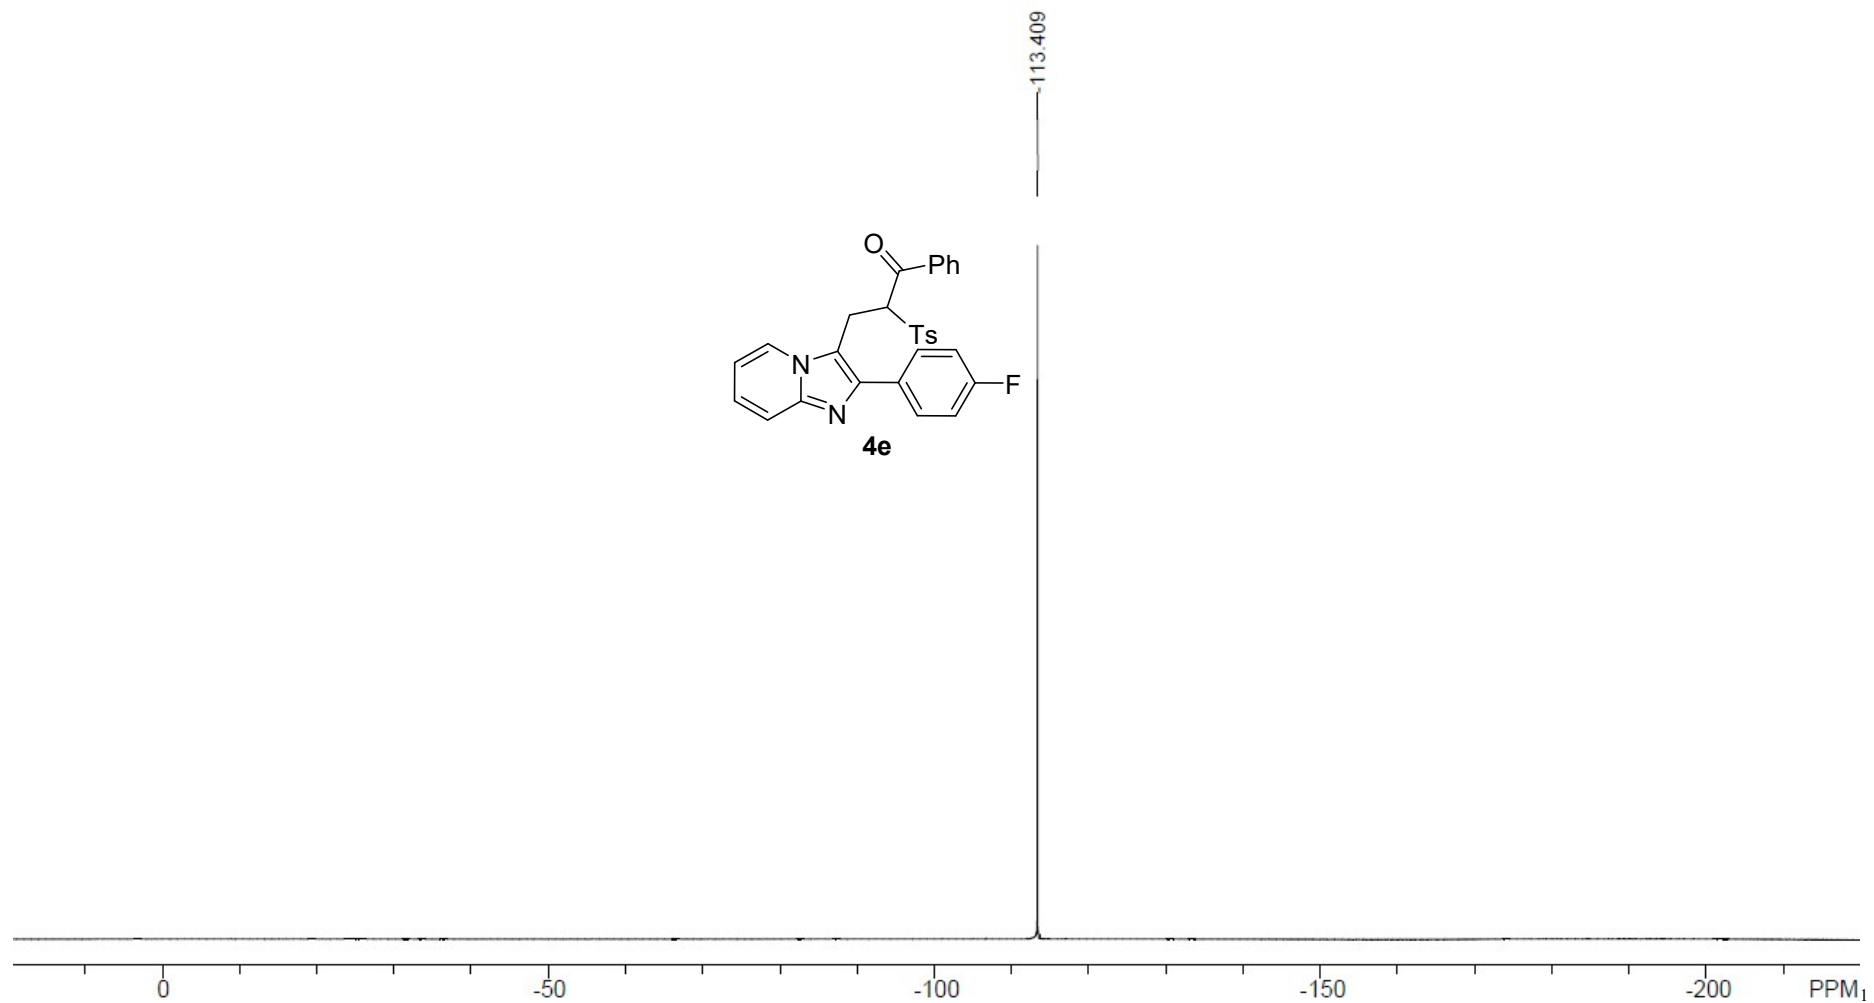

H NMR (500 MHz, CDCl<sub>3</sub>) of **4f**

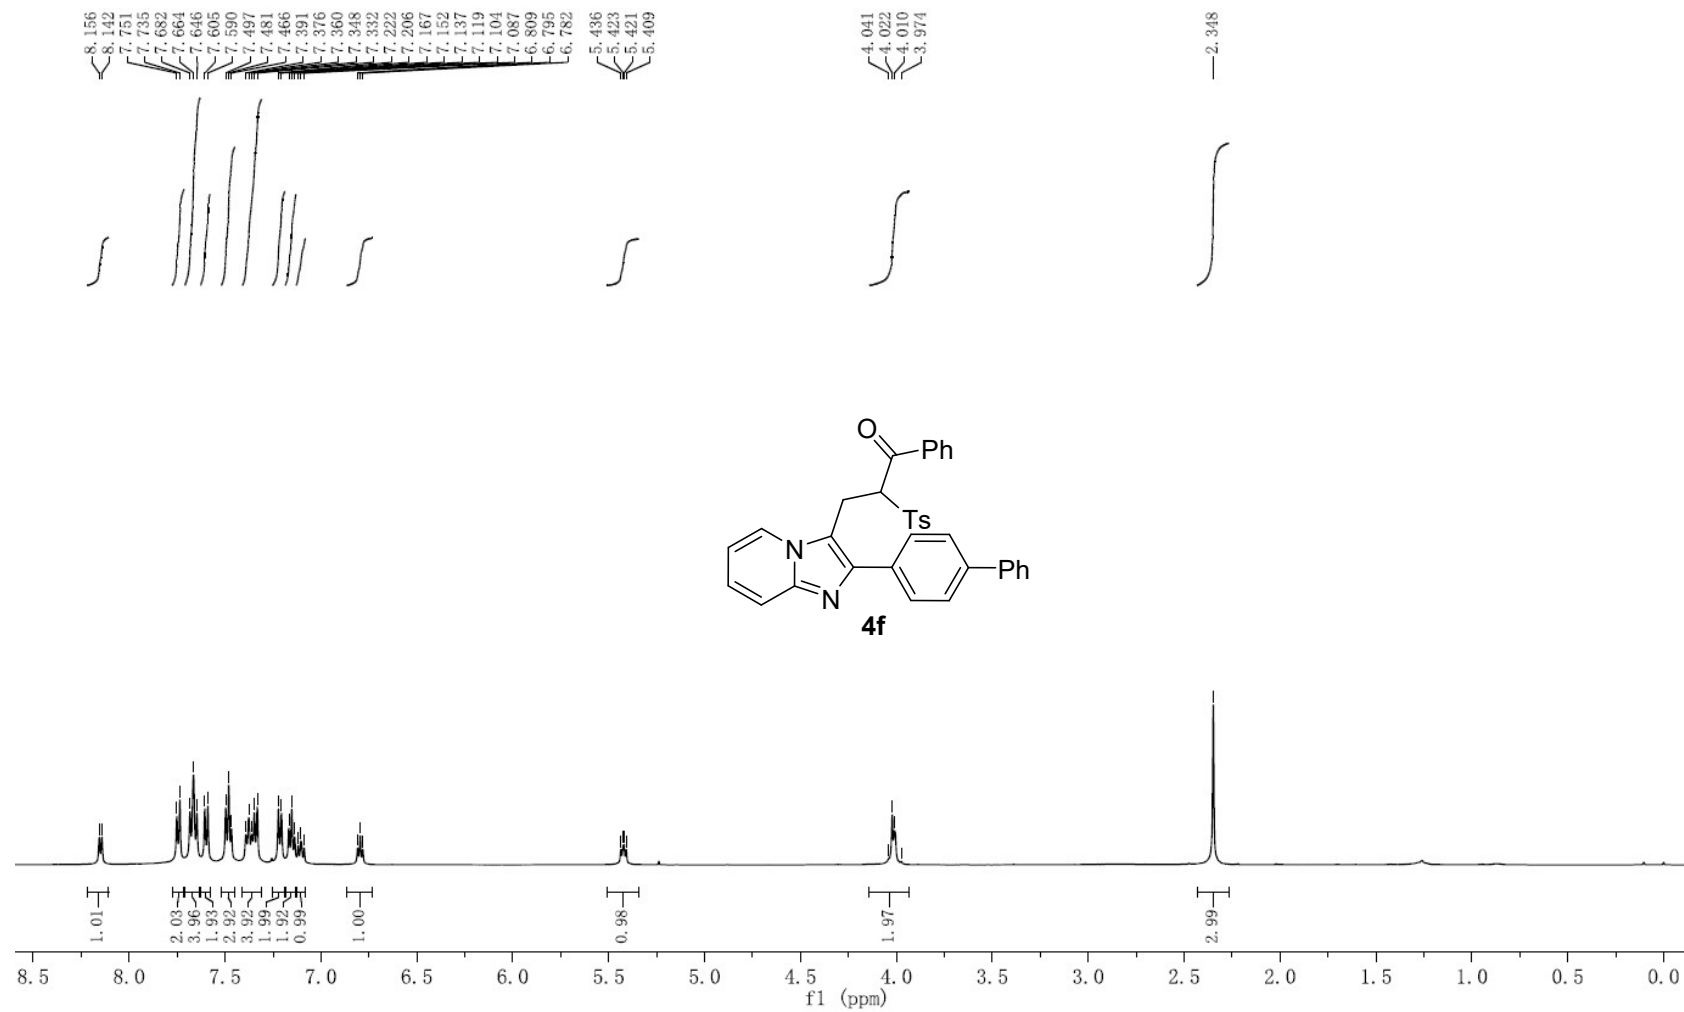



$^{13}\text{C}$  NMR (126 MHz,  $\text{CDCl}_3$ ) of **4f**

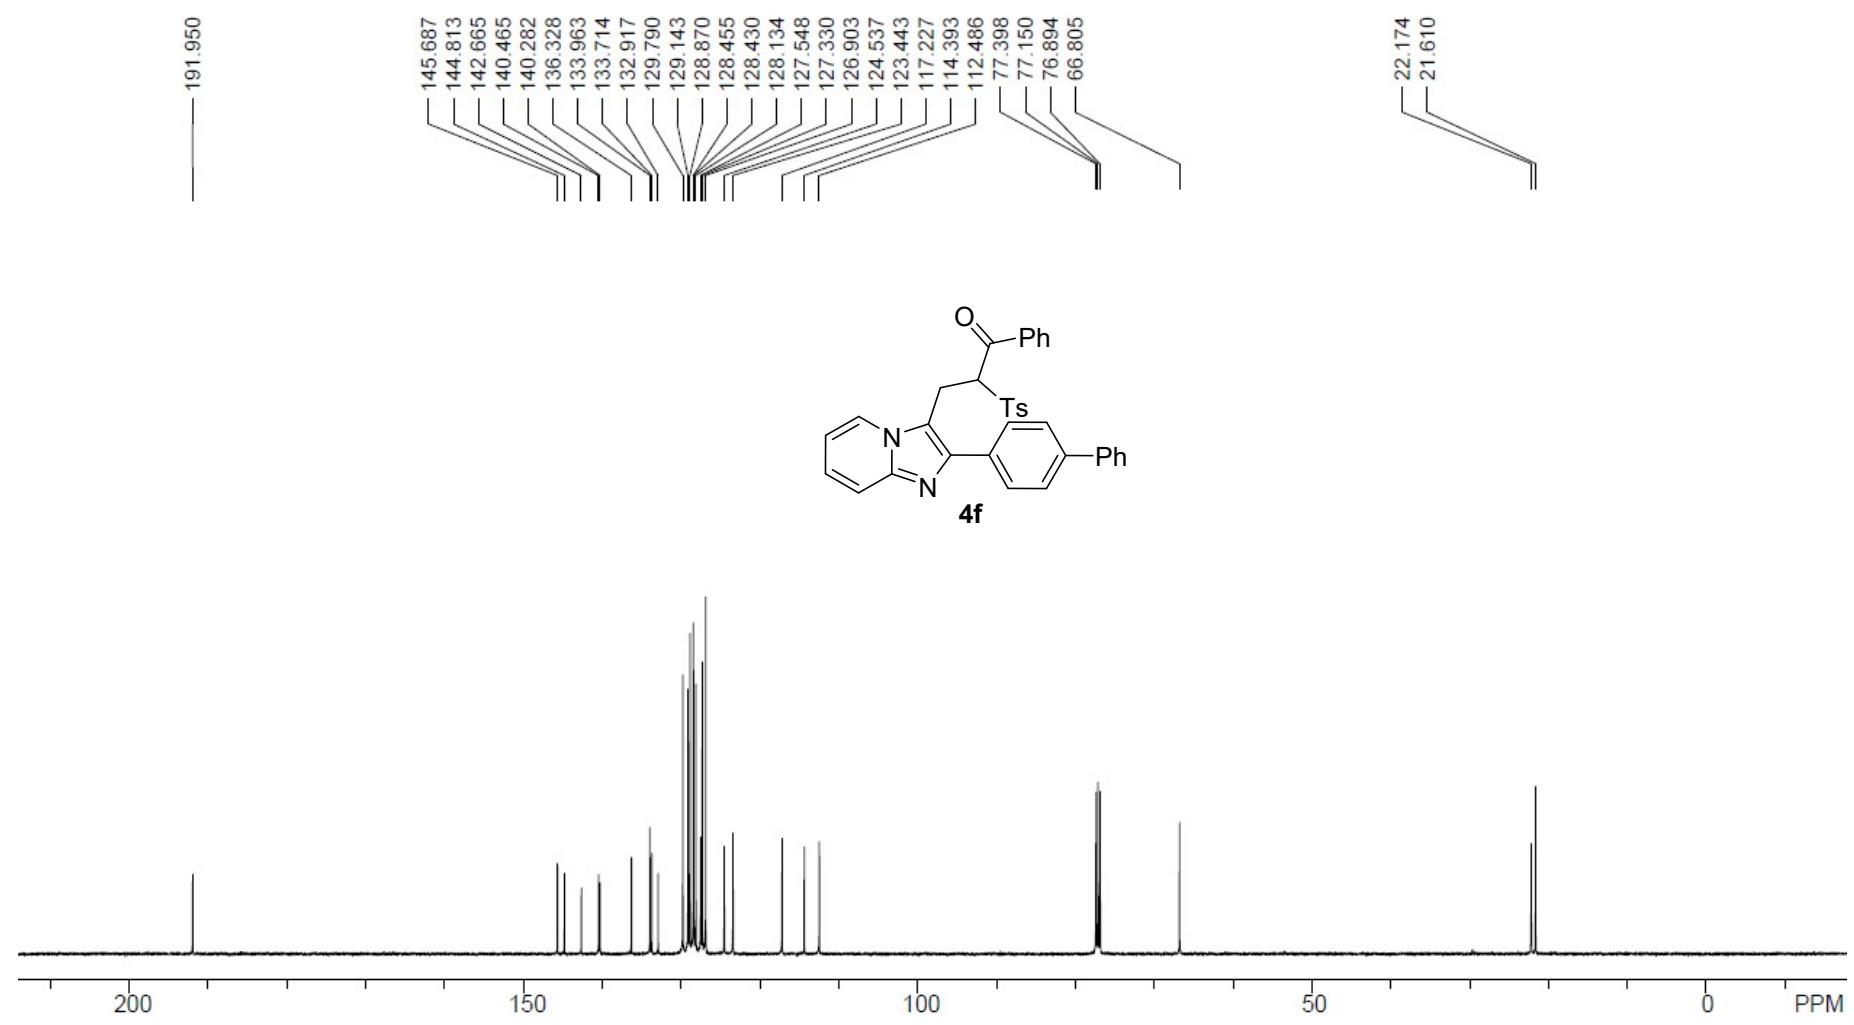

<sup>1</sup>H NMR (500 MHz, CDCl<sub>3</sub>) of **4g**

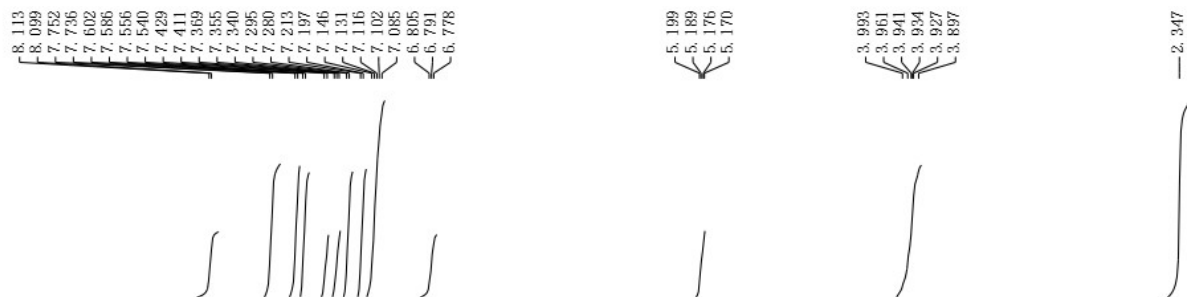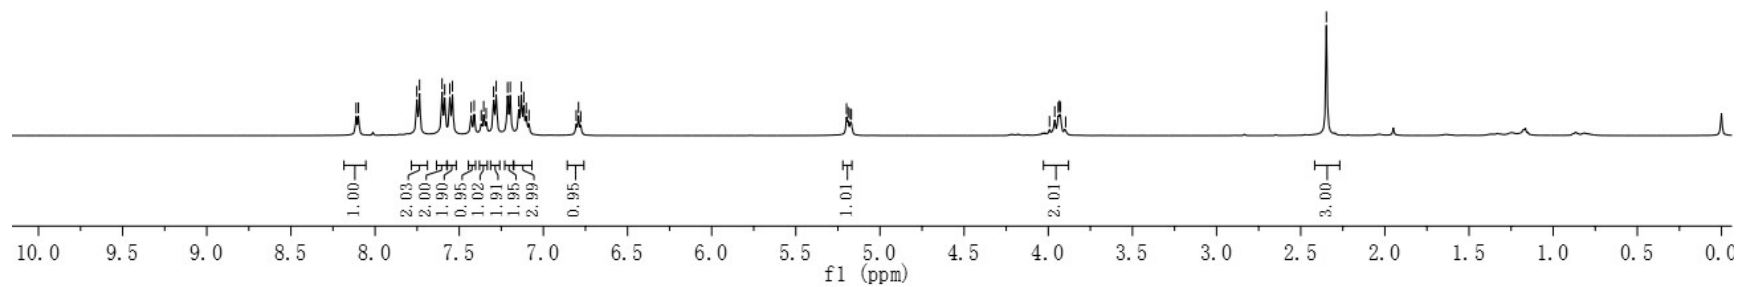

$^{13}\text{C}$  NMR (126 MHz,  $\text{CDCl}_3$ ) of **4g**

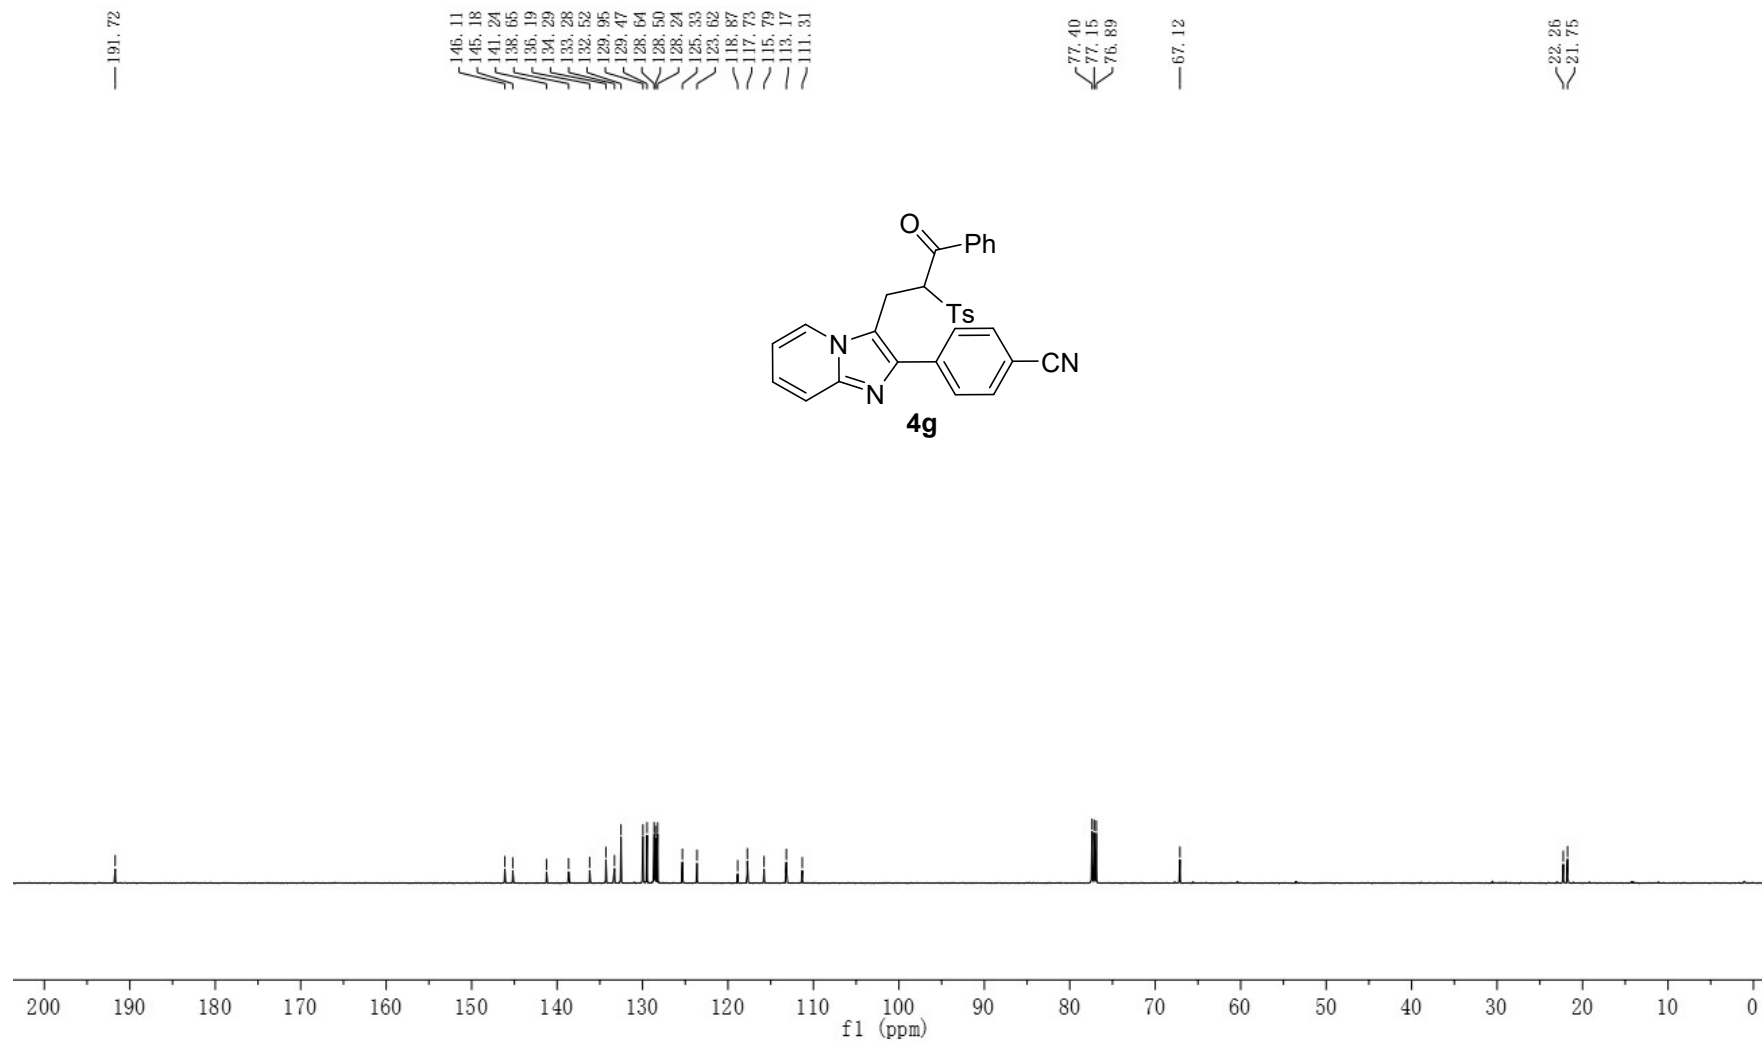

<sup>1</sup>H NMR (500 MHz, CDCl<sub>3</sub>) of **4h**

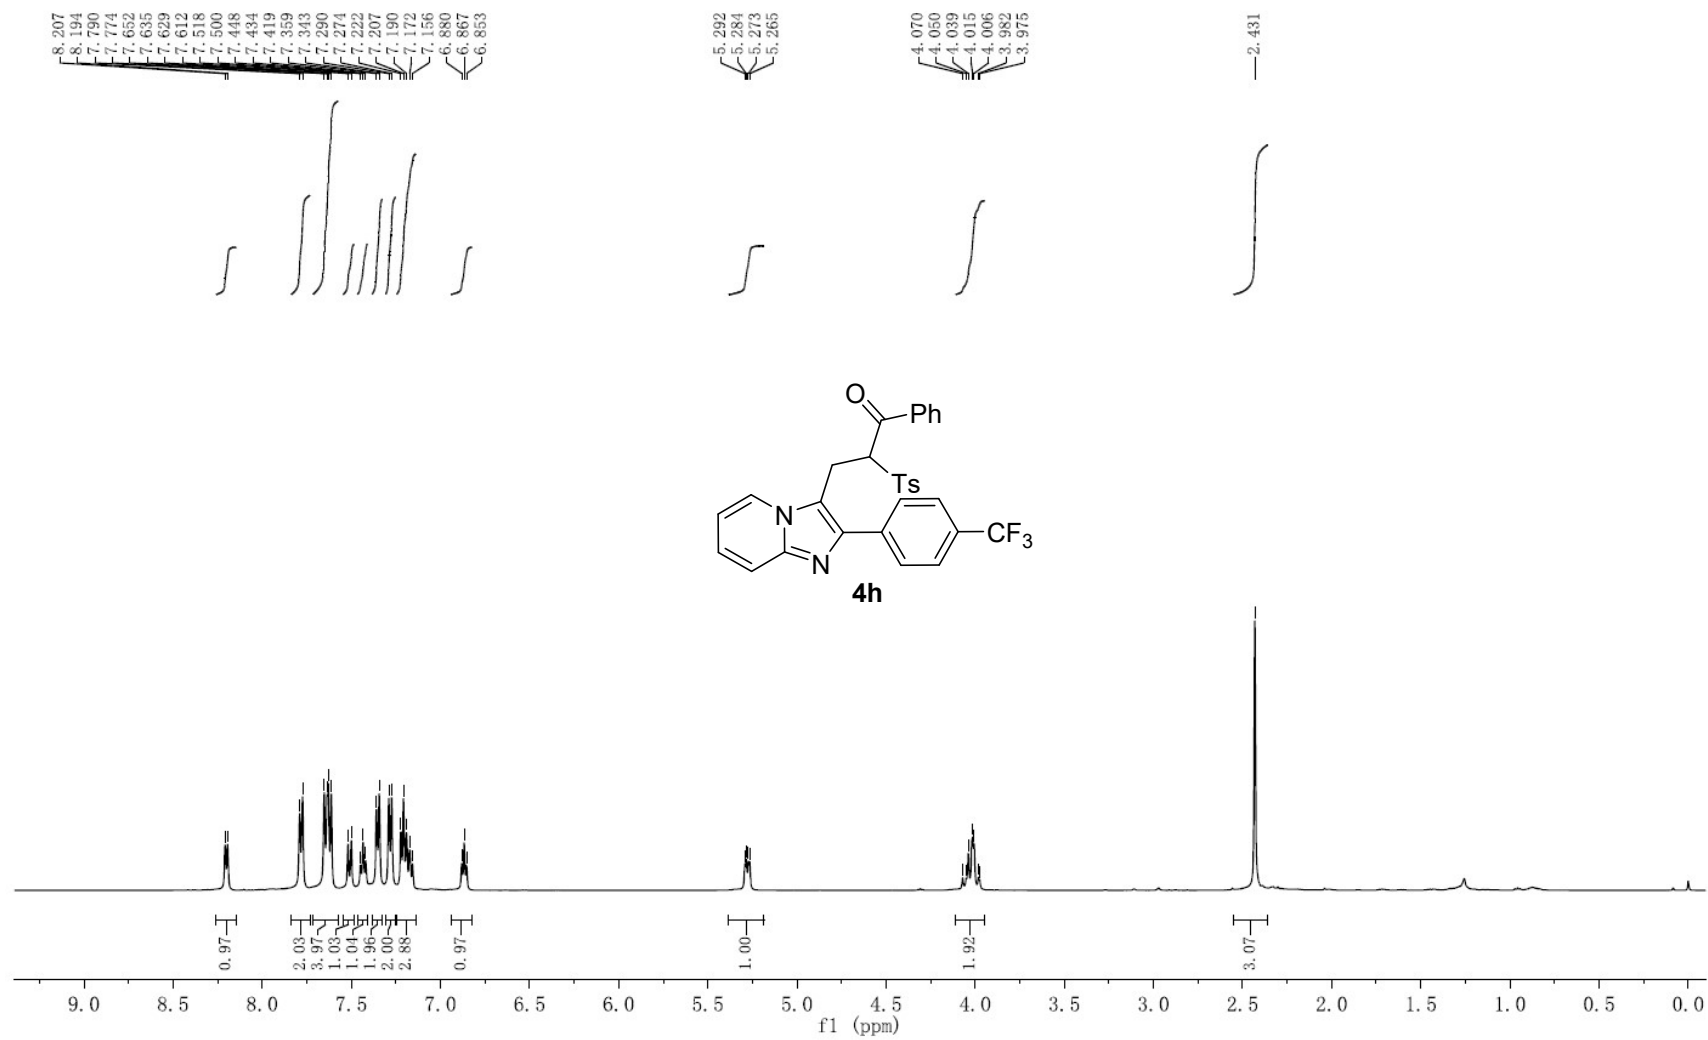

$^{13}\text{C}$  NMR (126 MHz,  $\text{CDCl}_3$ ) of **4h**

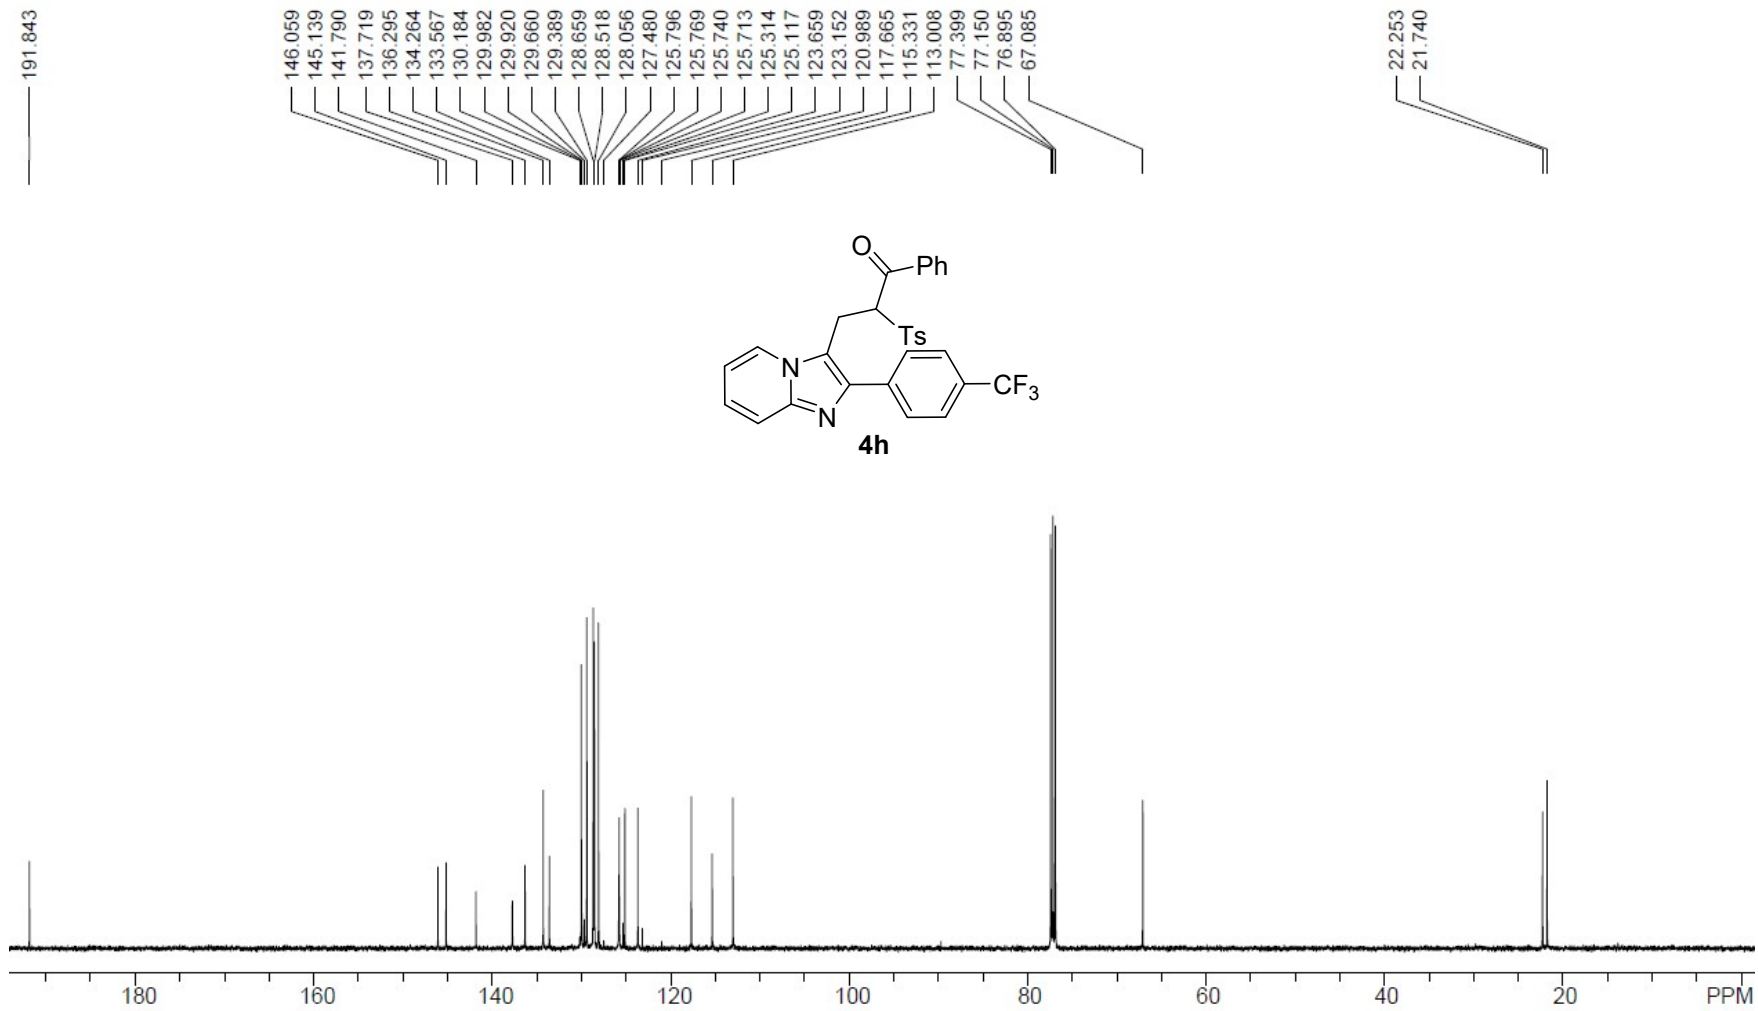

$^{19}\text{F}$  NMR (471 MHz,  $\text{CDCl}_3$ ) of **4h**

62.417

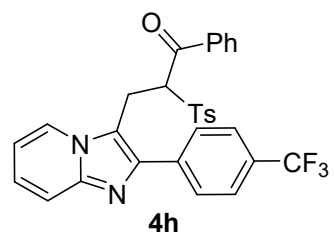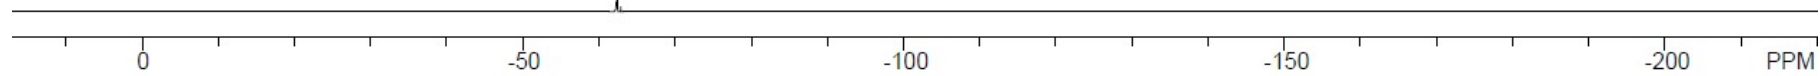

<sup>1</sup>H NMR (500 MHz, CDCl<sub>3</sub>) of **4i**

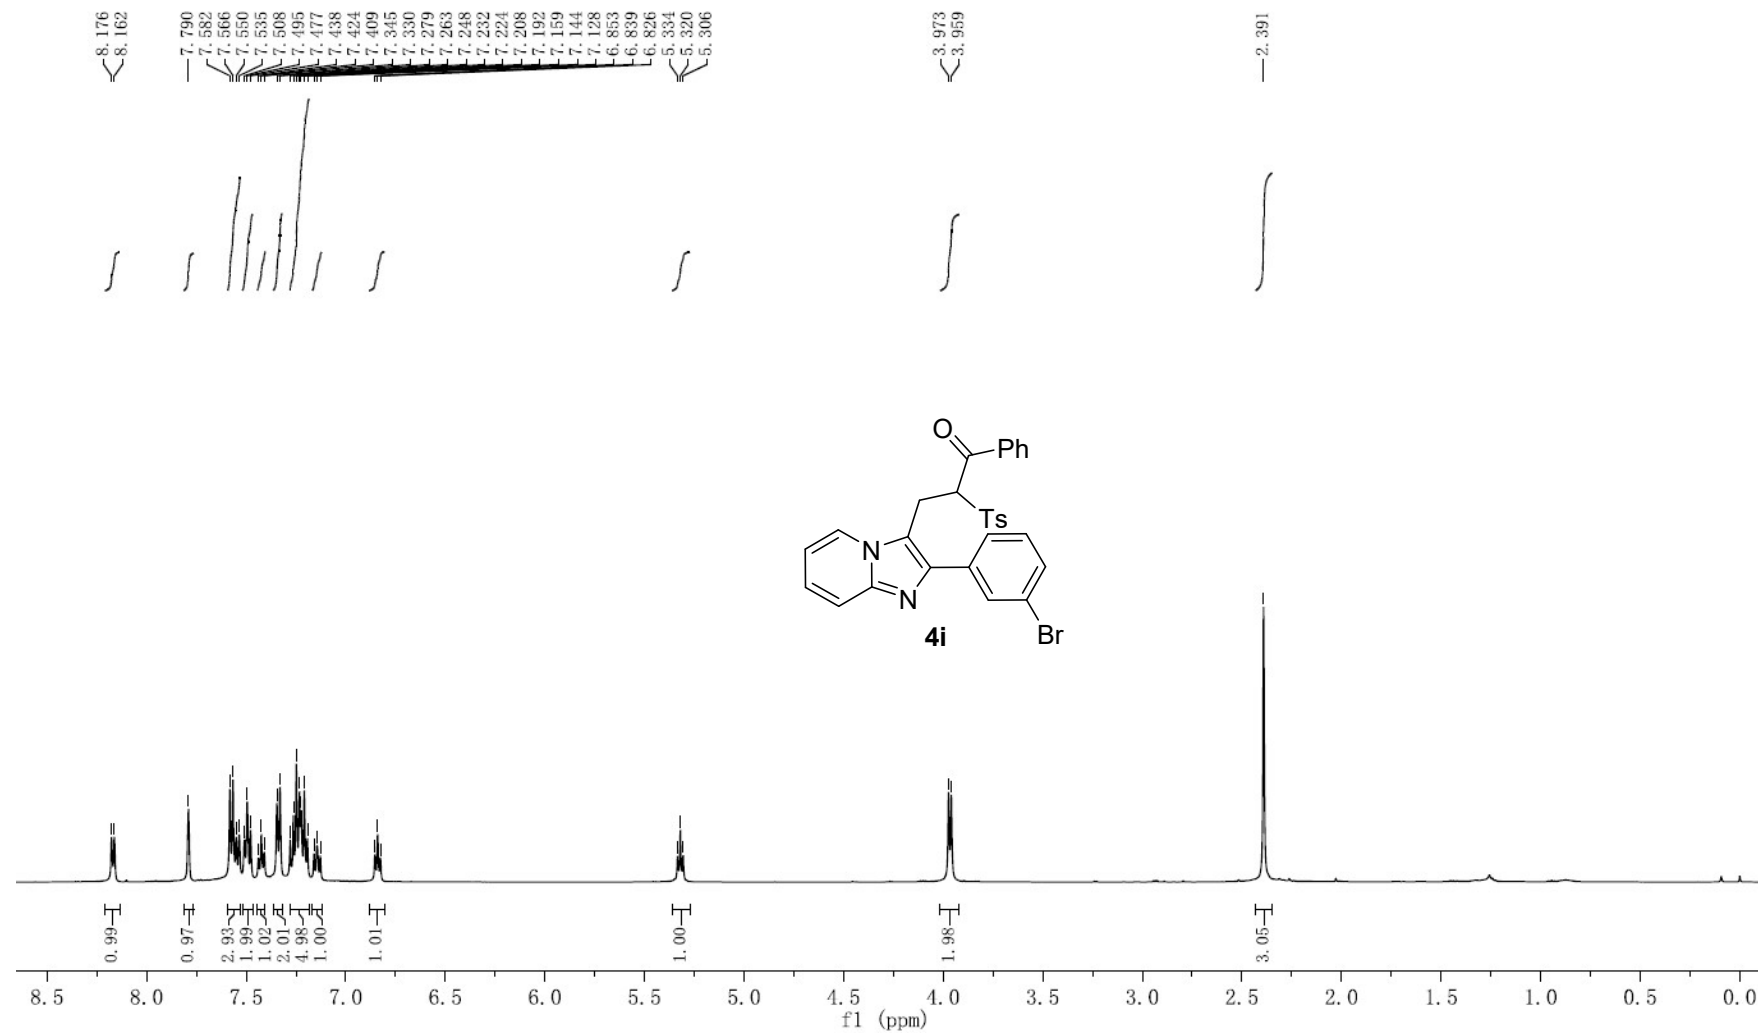

$^{13}\text{C}$  NMR (126 MHz,  $\text{CDCl}_3$ ) of **4i**

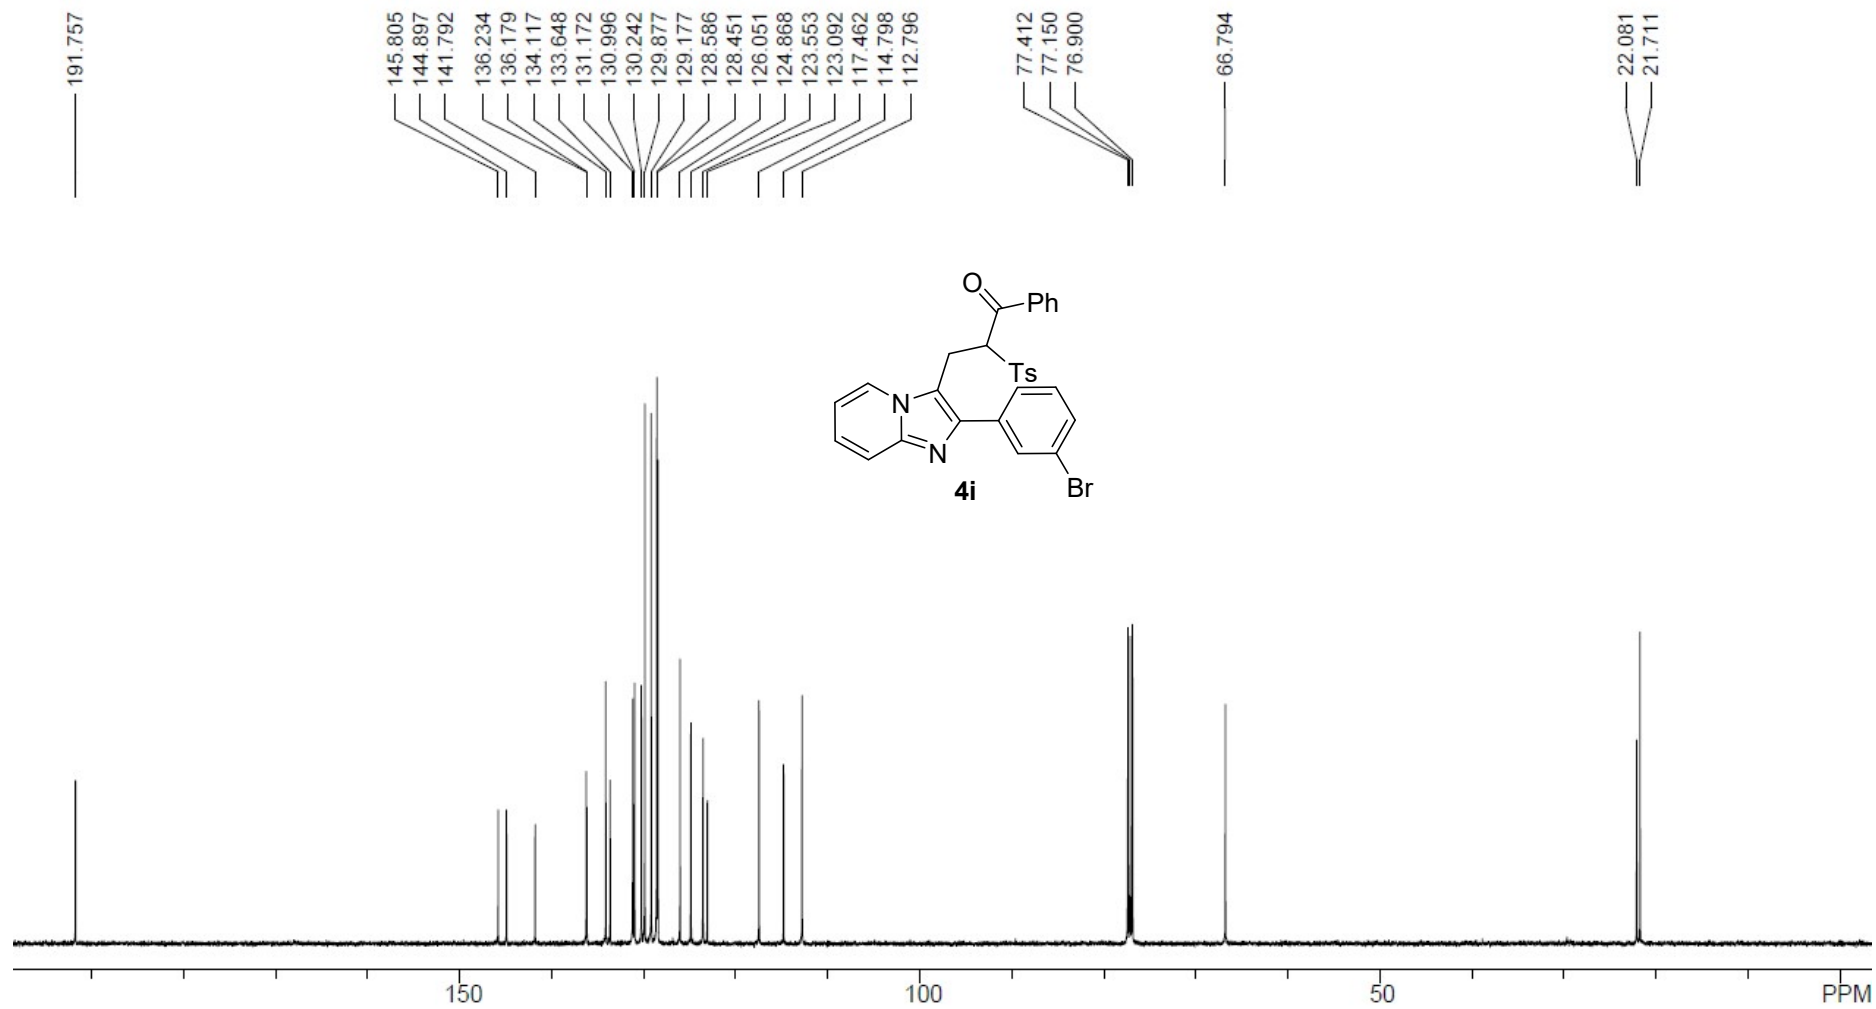



<sup>1</sup>H NMR (500 MHz, CDCl<sub>3</sub>) of **4j**

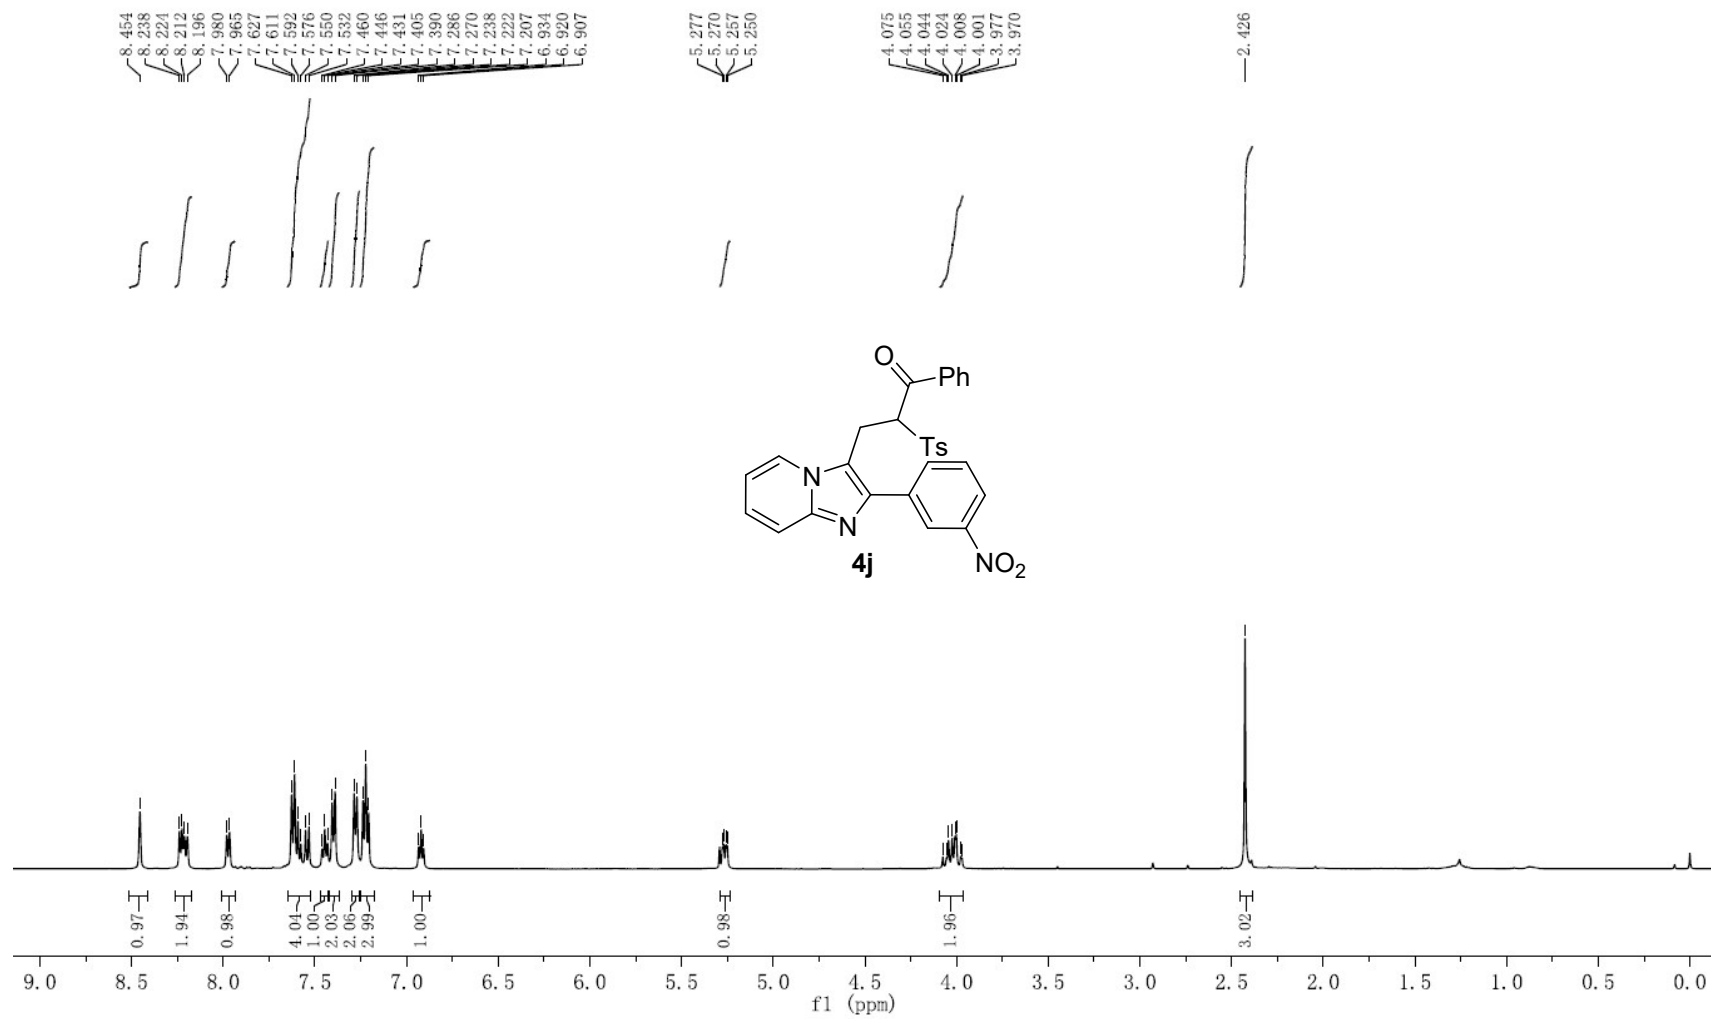

$^{13}\text{C}$  NMR (126 MHz,  $\text{CDCl}_3$ ) of **4j**

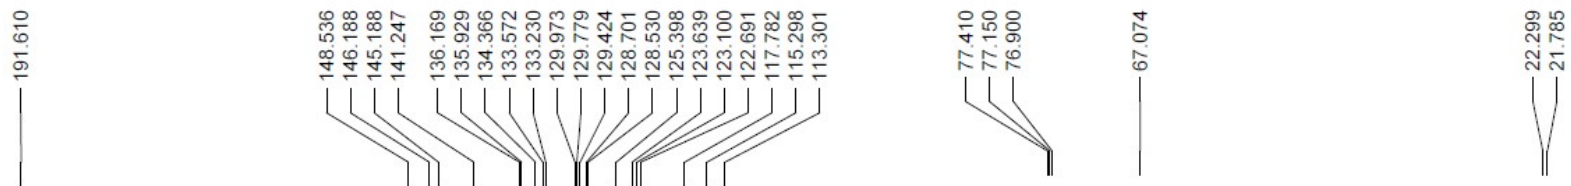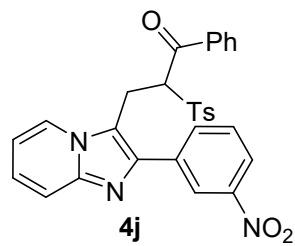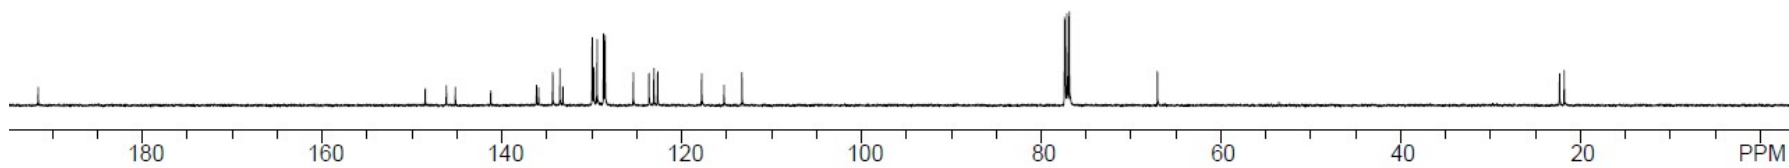

<sup>1</sup>H NMR (500 MHz, CDCl<sub>3</sub>) of **4k**

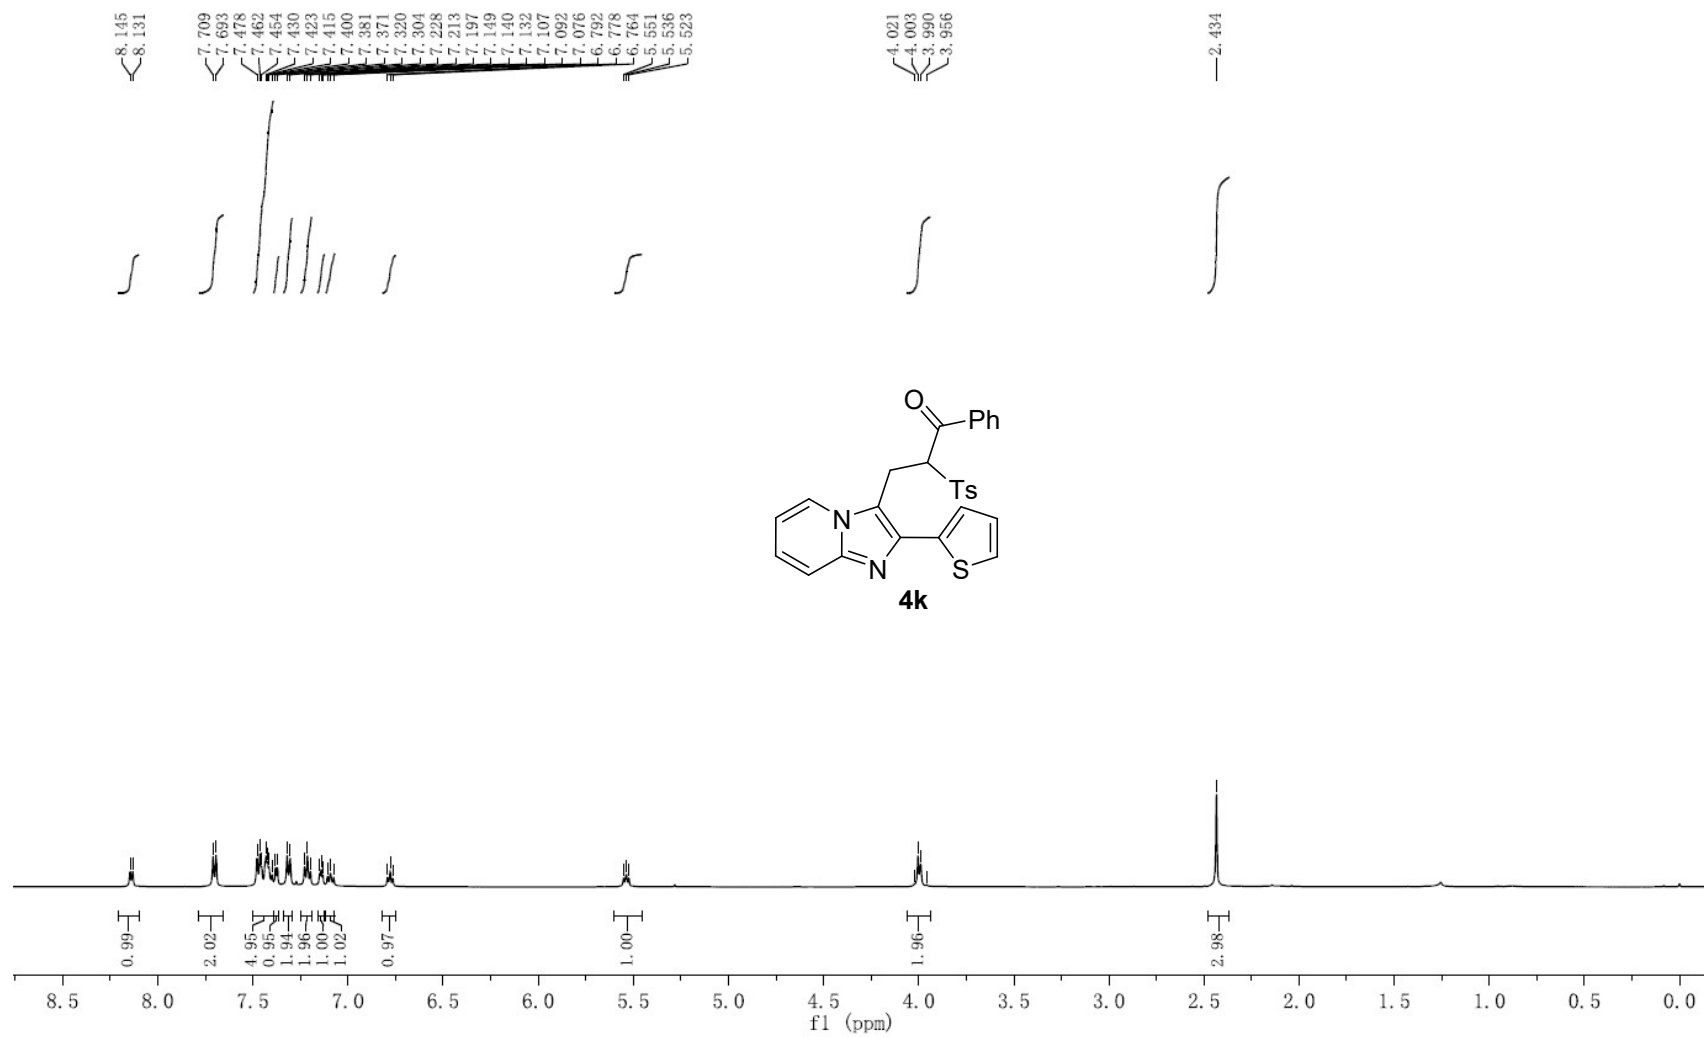

$^{13}\text{C}$  NMR (126 MHz,  $\text{CDCl}_3$ ) of **4k**

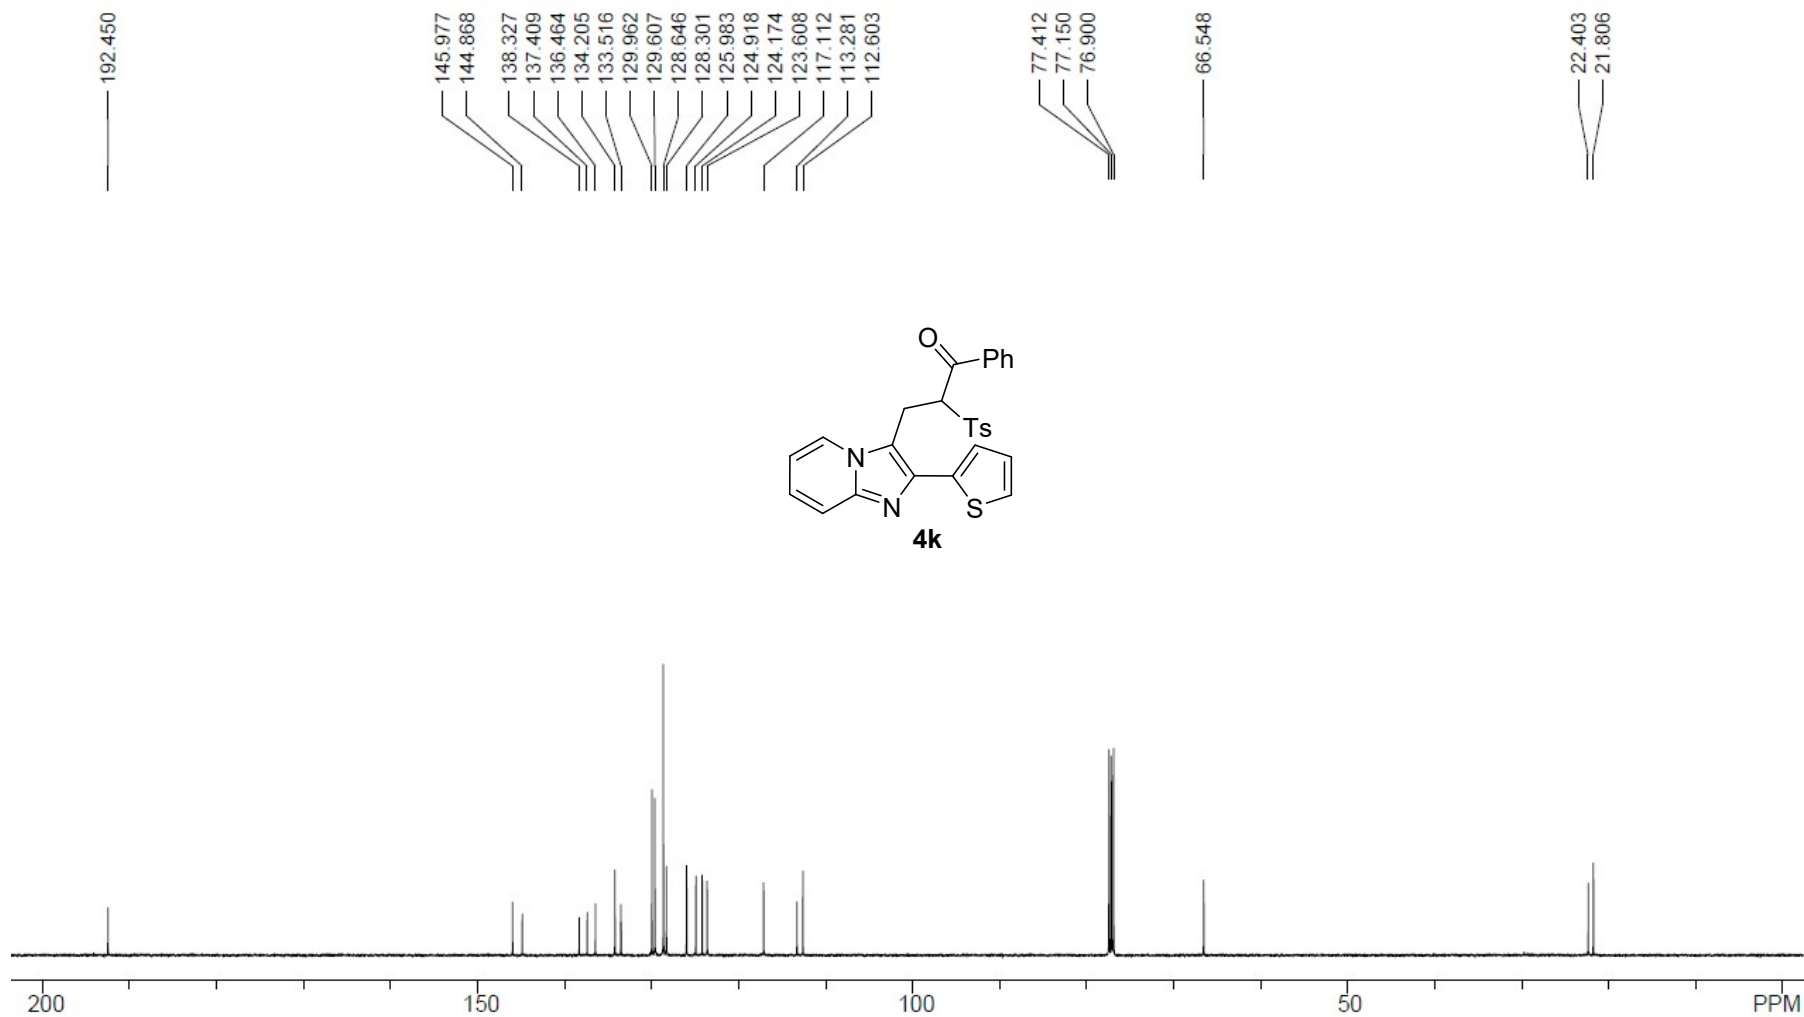

<sup>1</sup>H NMR (500 MHz, CDCl<sub>3</sub>) of **4l**

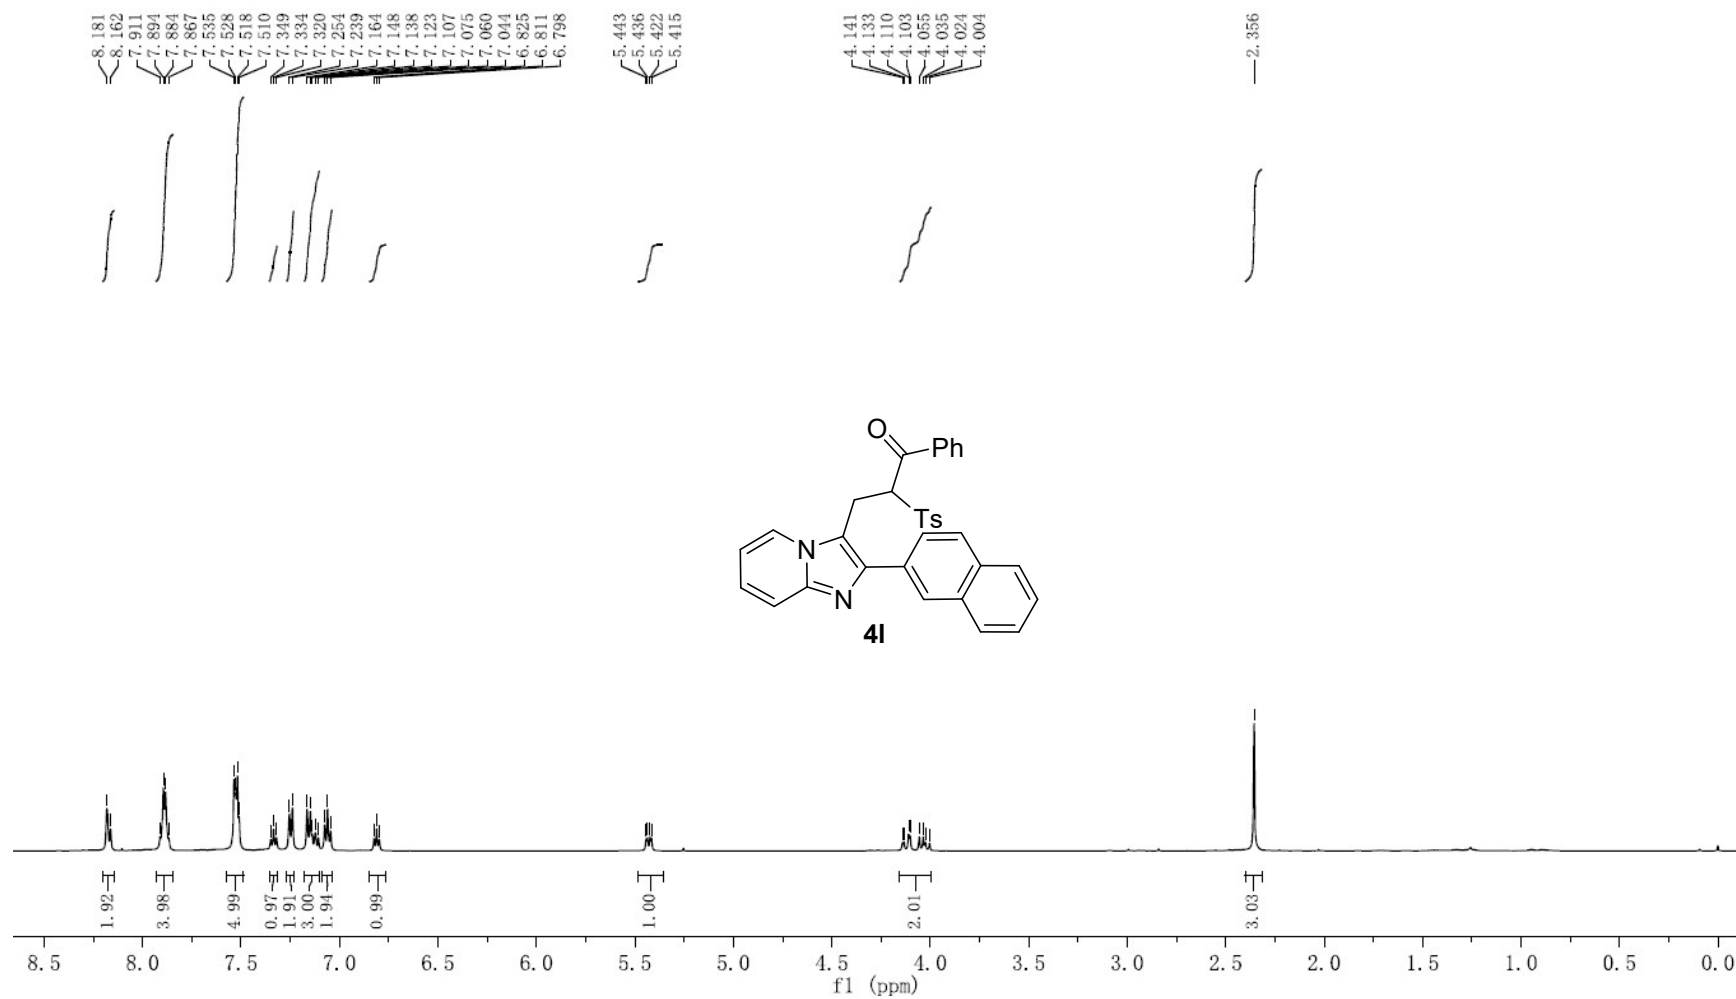

$^{13}\text{C}$  NMR (126 MHz,  $\text{CDCl}_3$ ) of **41**

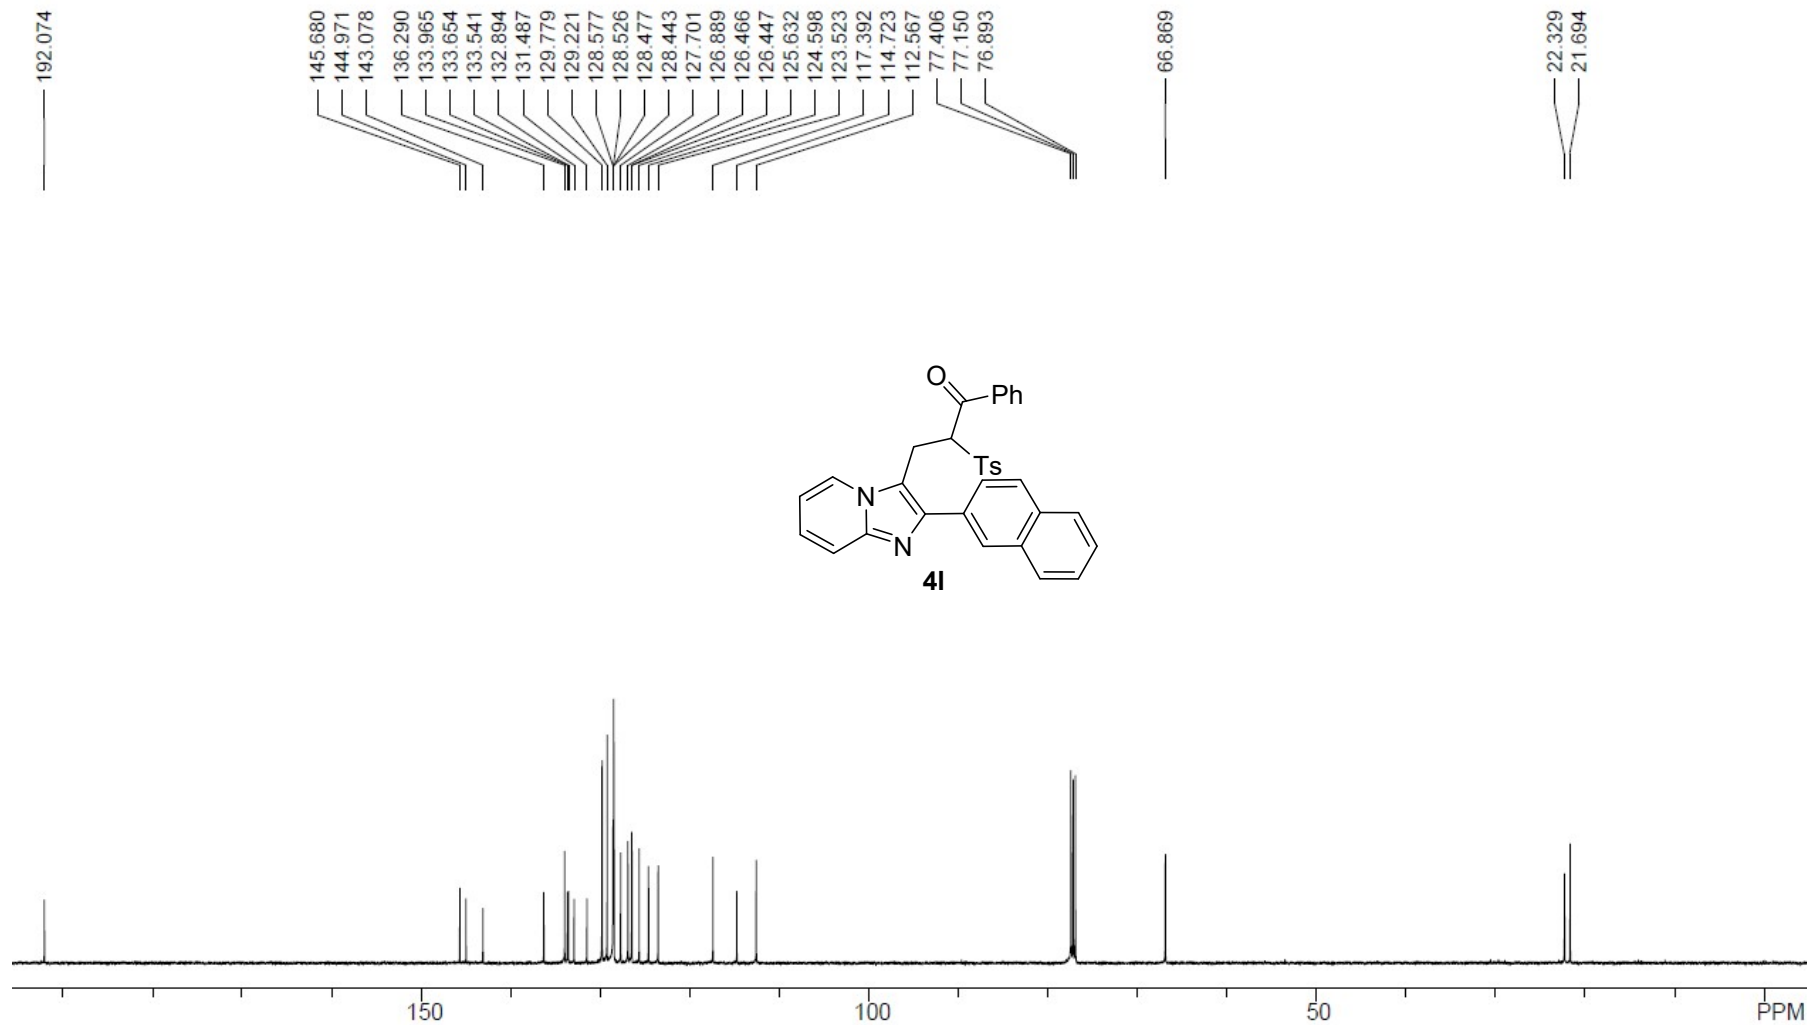

<sup>1</sup>H NMR (500 MHz, CDCl<sub>3</sub>) of **4m**

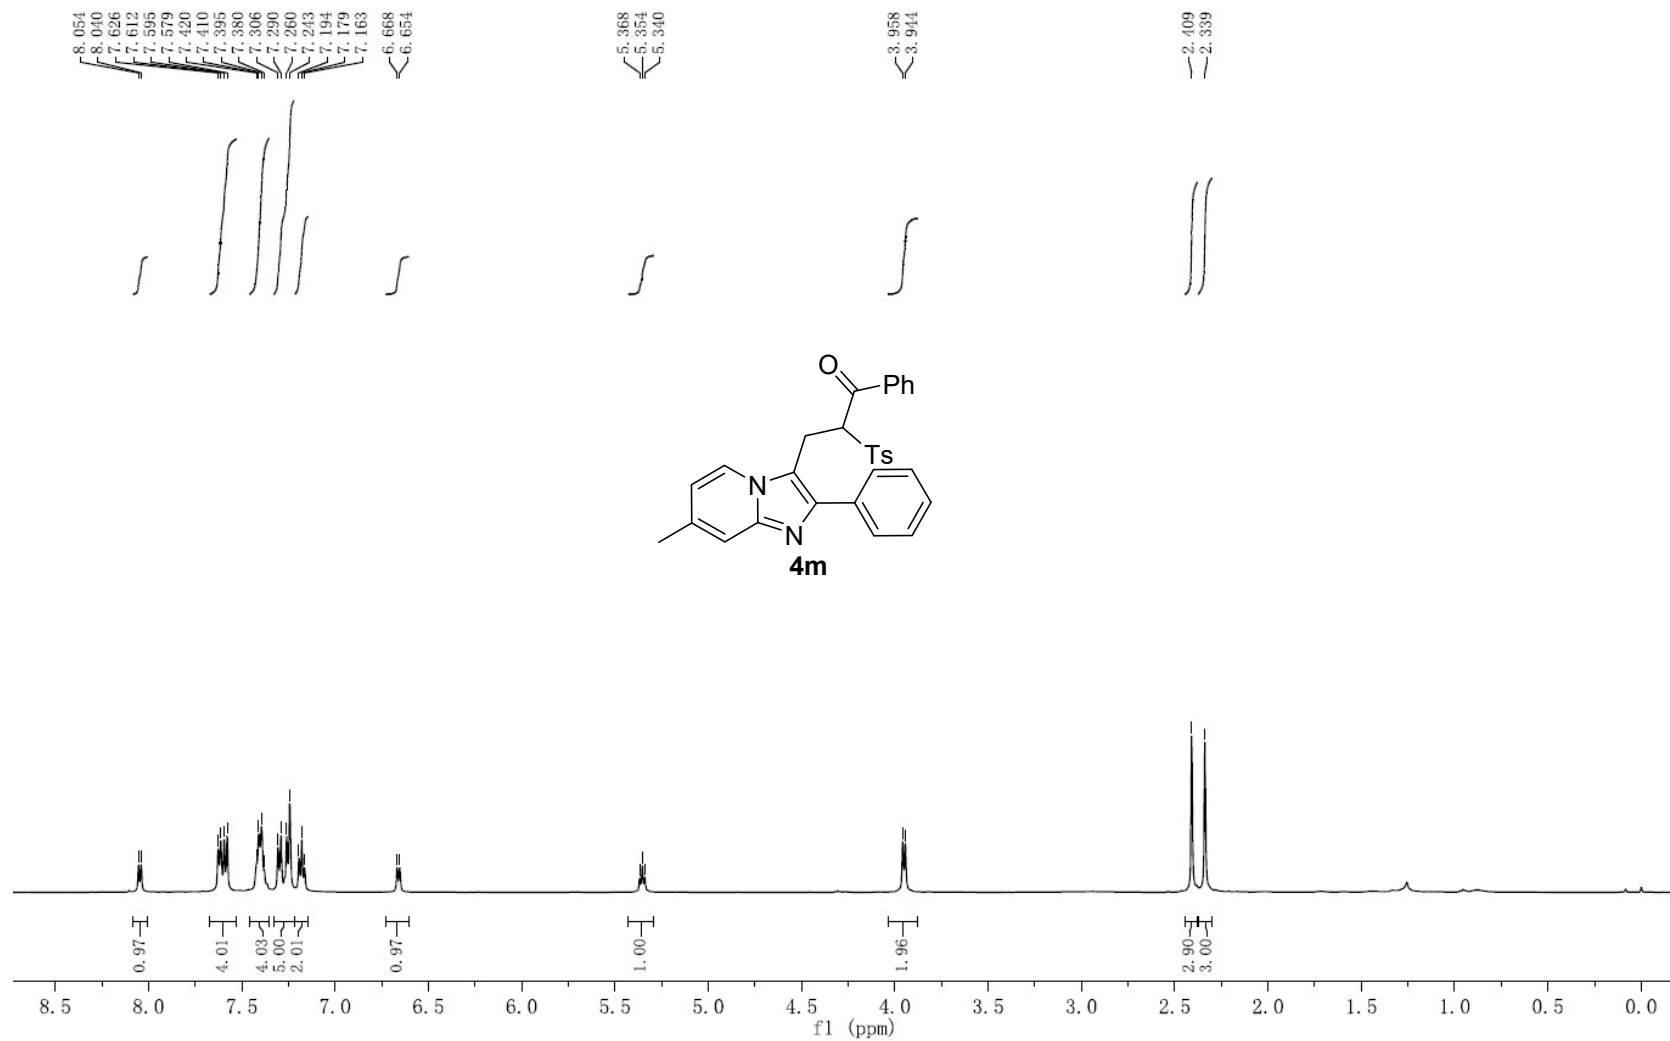

$^{13}\text{C}$  NMR (126 MHz,  $\text{CDCl}_3$ ) of **4m**

192.031

145.730  
145.278  
142.799  
136.485  
135.636  
134.148  
133.995  
133.787  
129.859  
129.268  
128.858  
128.540  
128.527  
127.983  
127.844  
122.732  
115.722  
115.235  
113.656

77.409  
77.150  
76.900

66.833

22.149  
21.740  
21.263

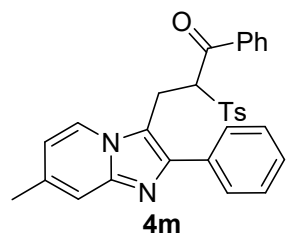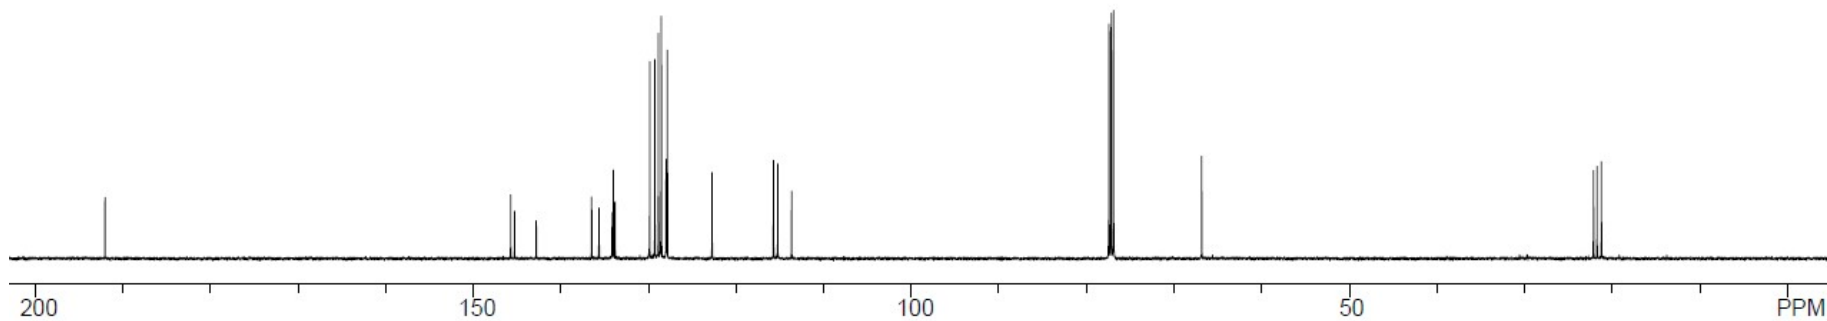



<sup>1</sup>H NMR (500 MHz, CDCl<sub>3</sub>) of **4n**

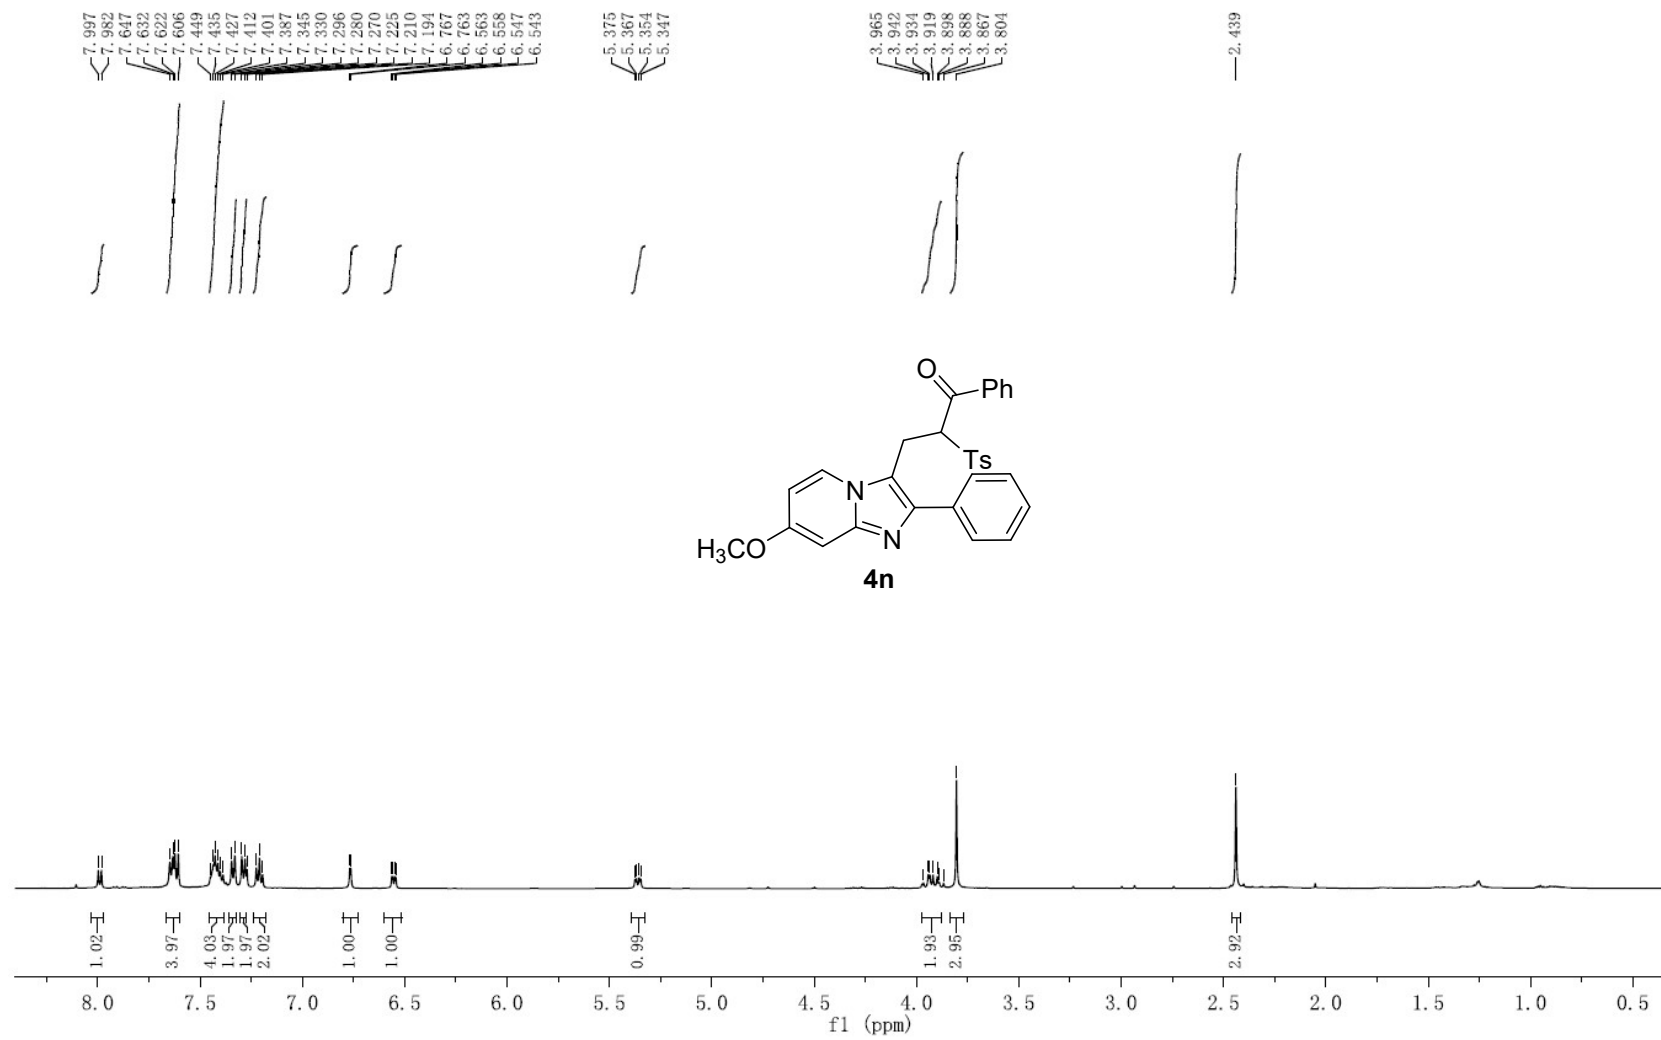

$^{13}\text{C}$  NMR (126 MHz,  $\text{CDCl}_3$ ) of **4n**

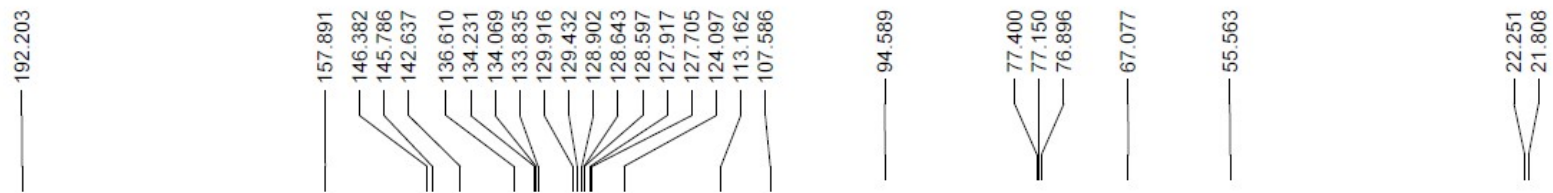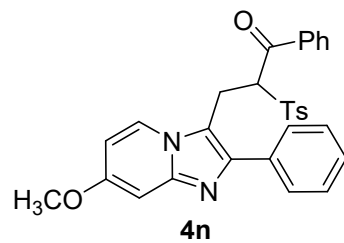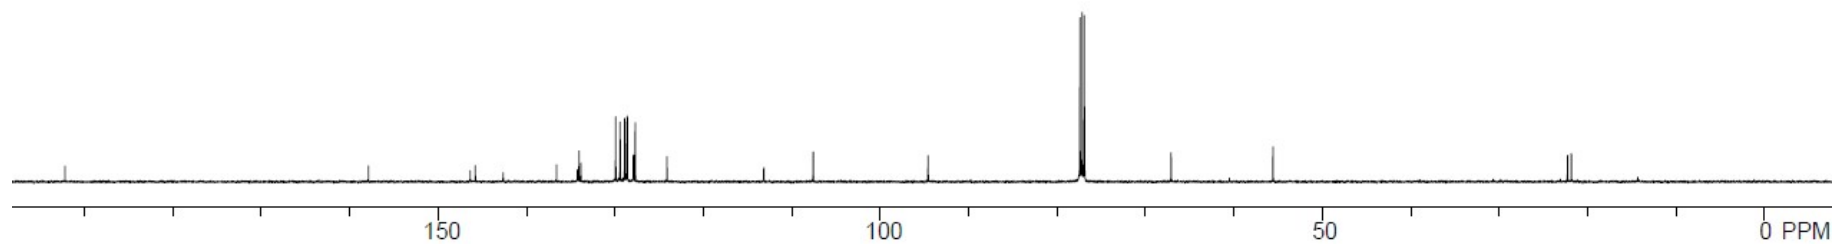

<sup>1</sup>H NMR (500 MHz, CDCl<sub>3</sub>) of **4o**

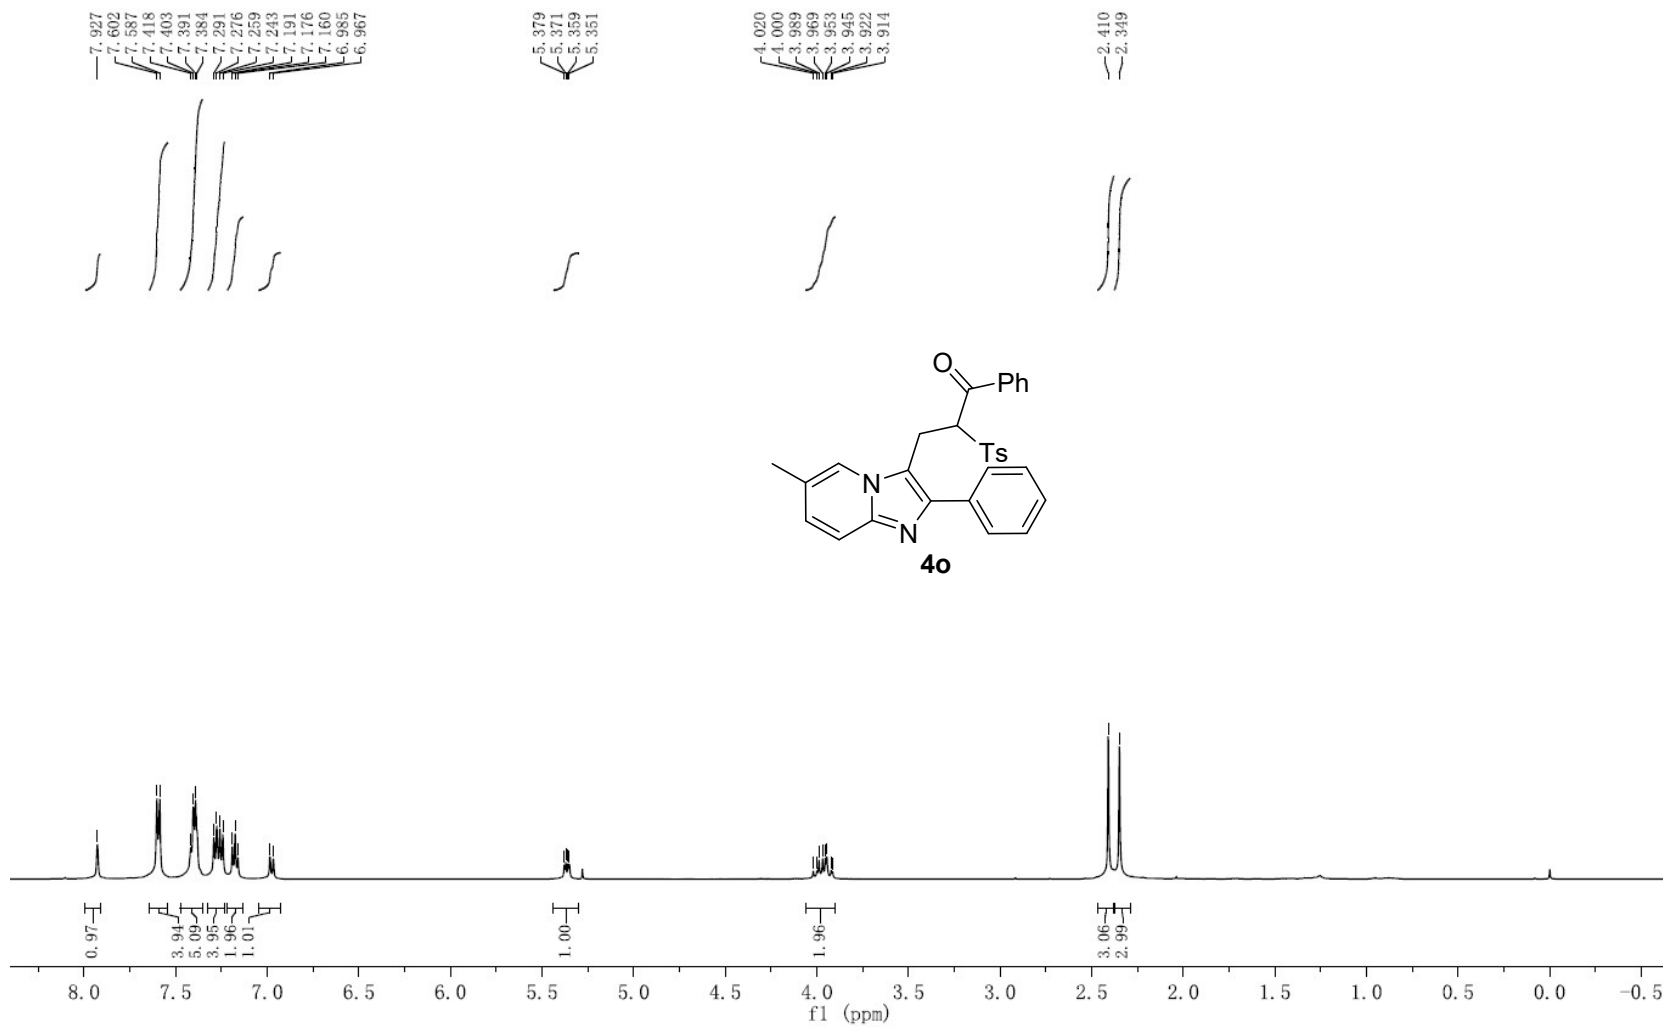

$^{13}\text{C}$  NMR (126 MHz,  $\text{CDCl}_3$ ) of **4o**

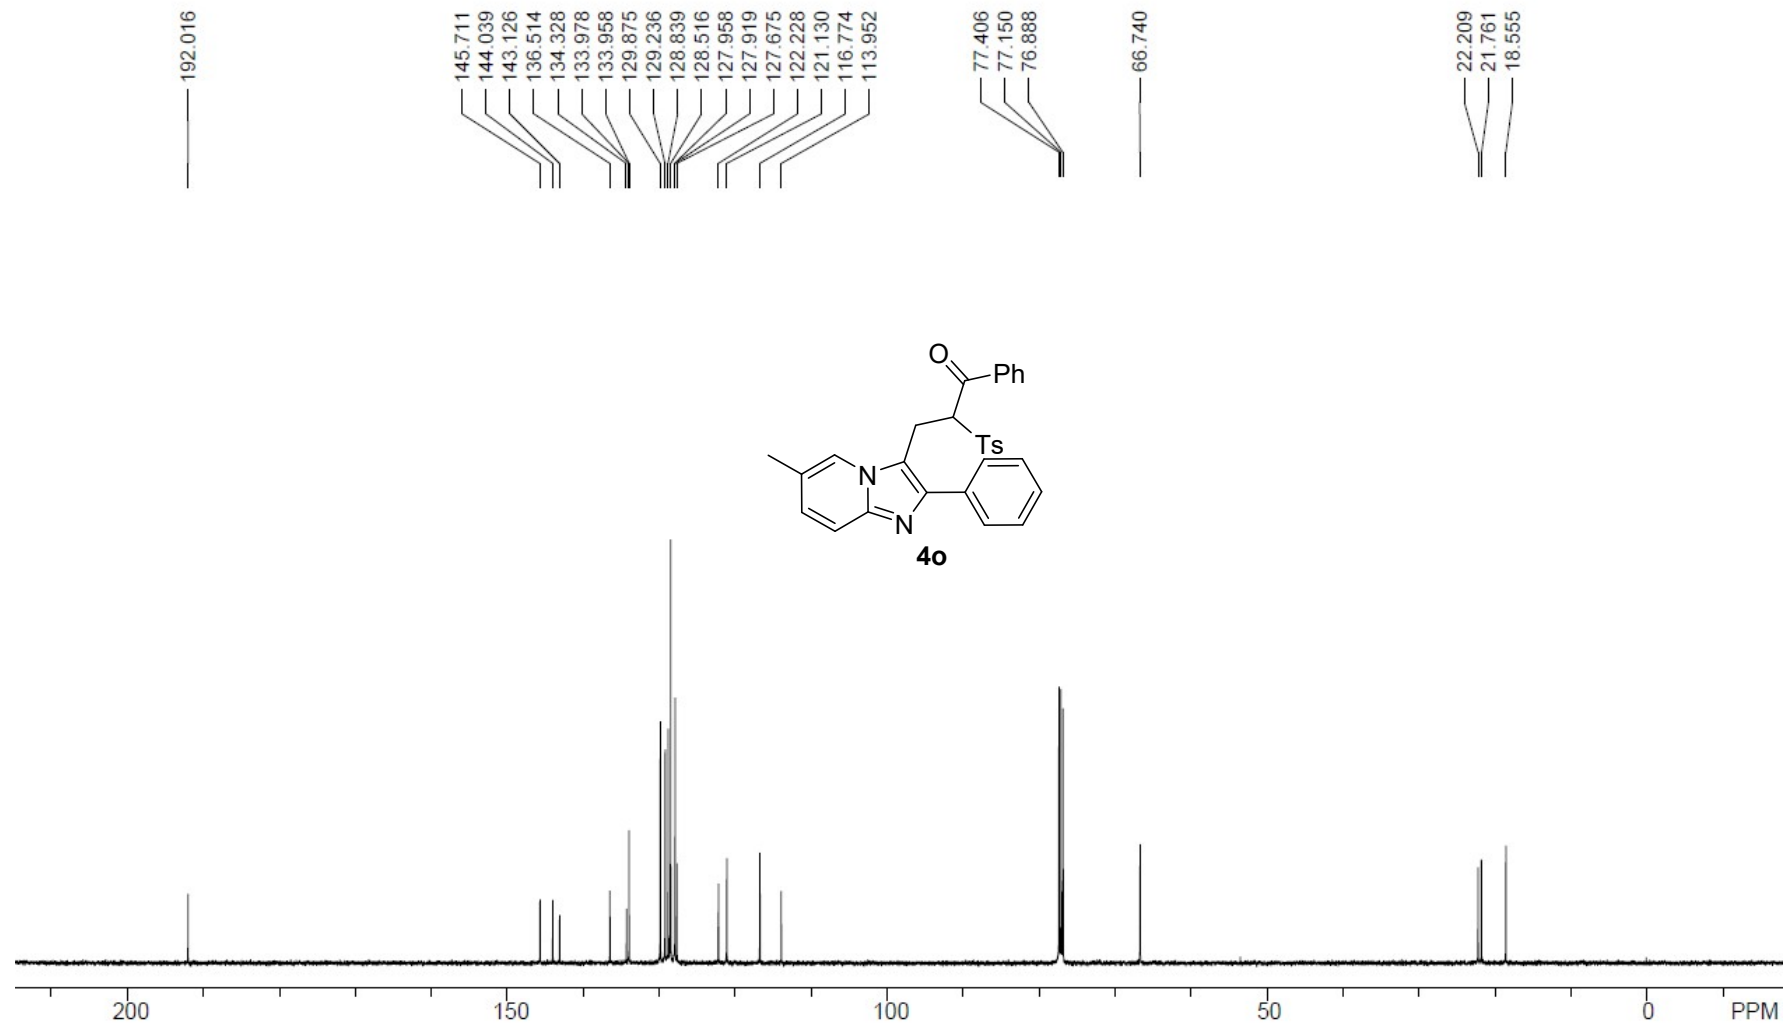

<sup>1</sup>H NMR (500 MHz, CDCl<sub>3</sub>) of **4p**

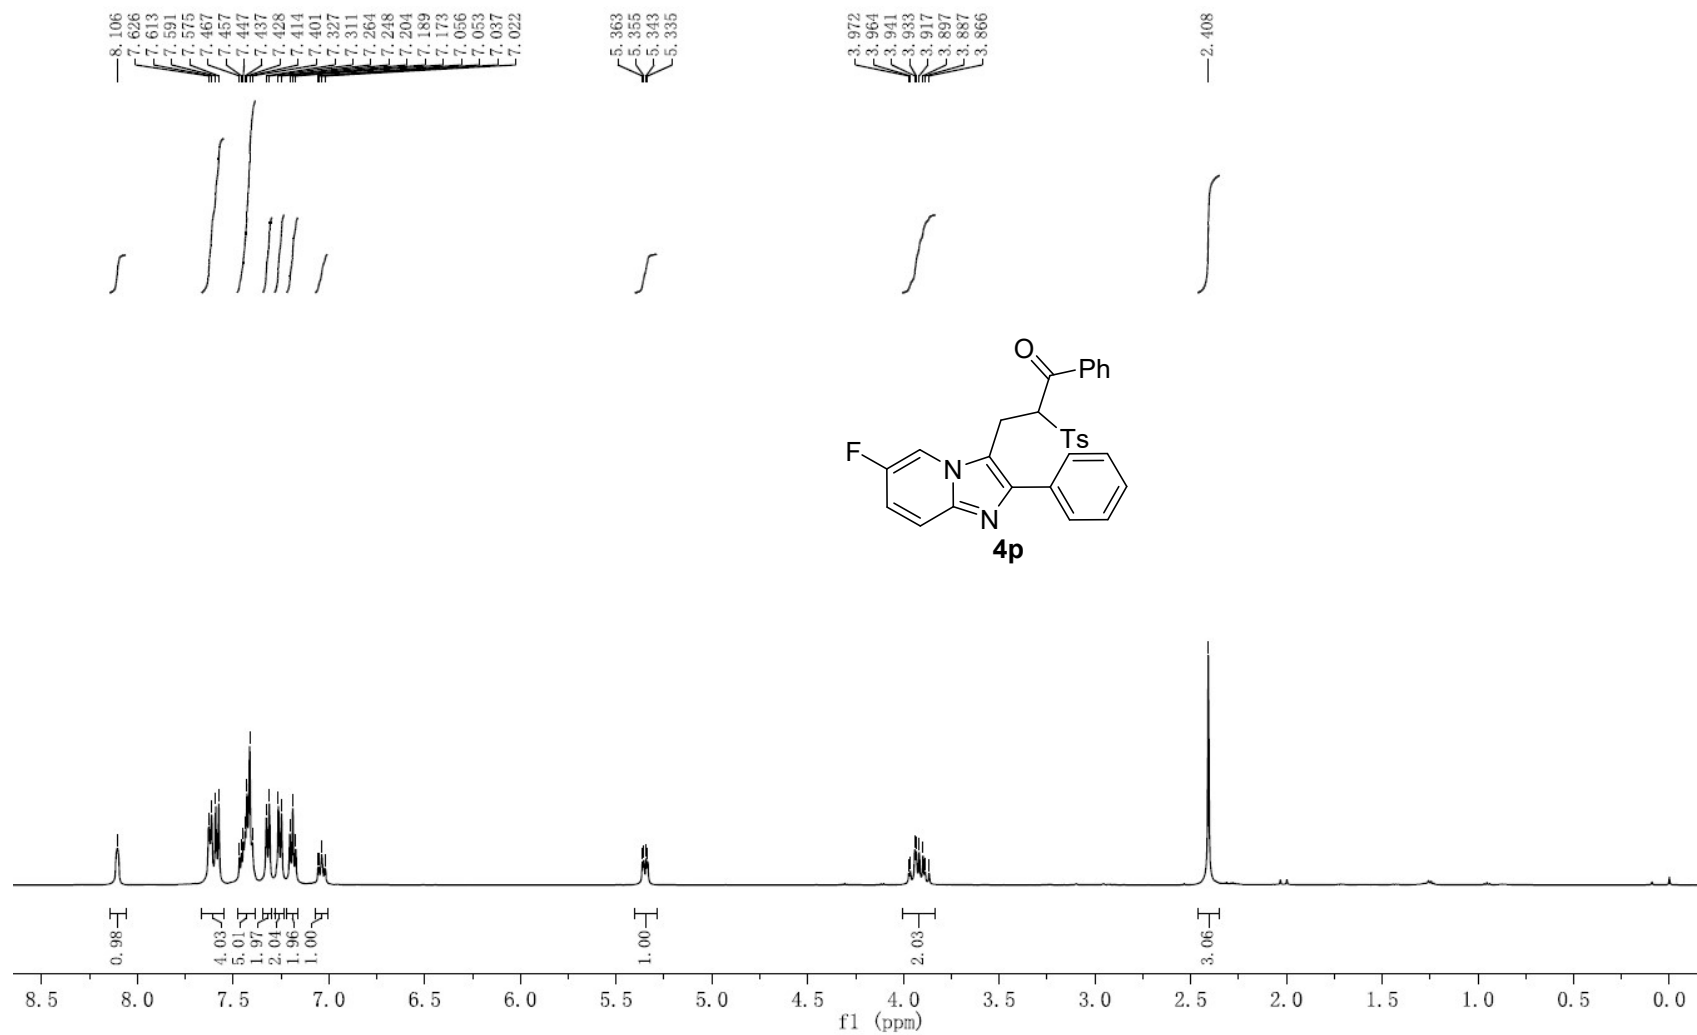

$^{13}\text{C}$  NMR (126 MHz,  $\text{CDCl}_3$ ) of **4p**

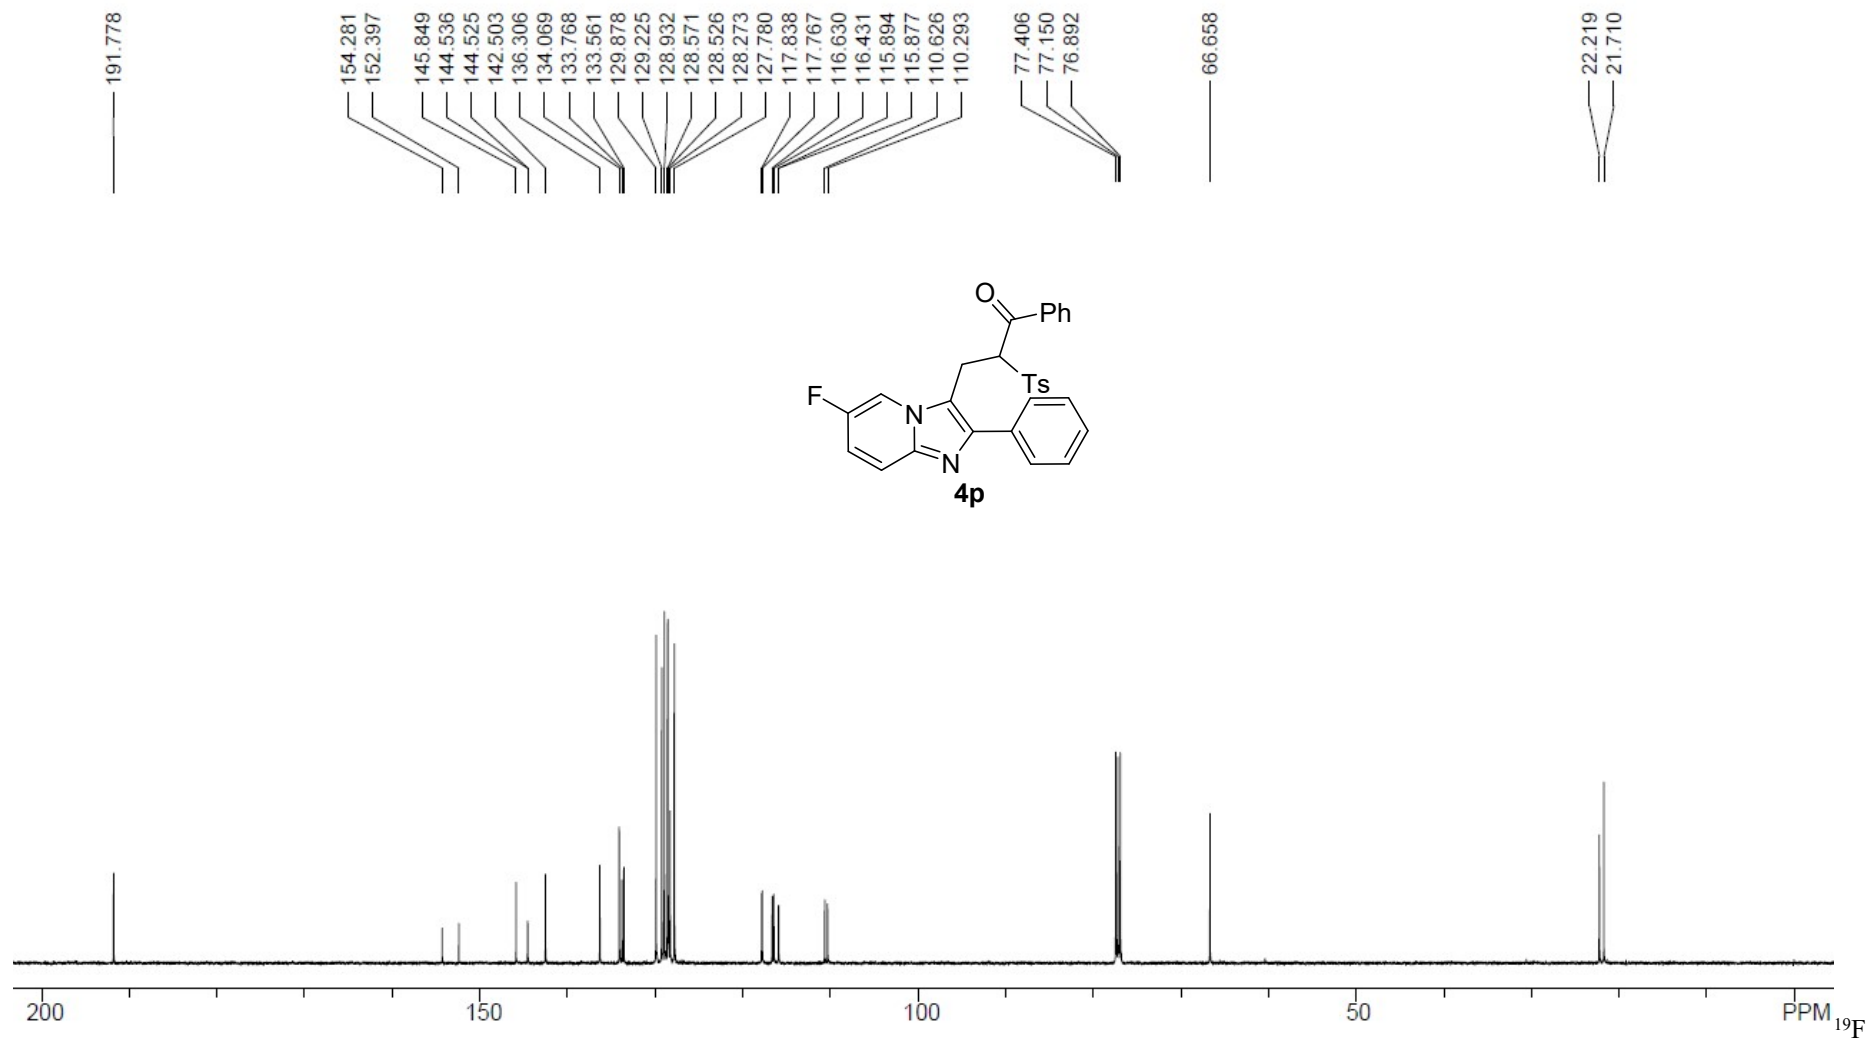

NMR (471 MHz, CDCl<sub>3</sub>) of **4p**

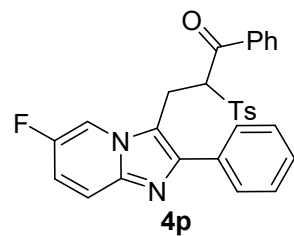

138.993

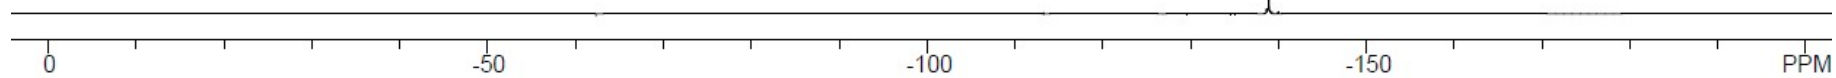

<sup>1</sup>H NMR (500 MHz, CDCl<sub>3</sub>) of **4q**

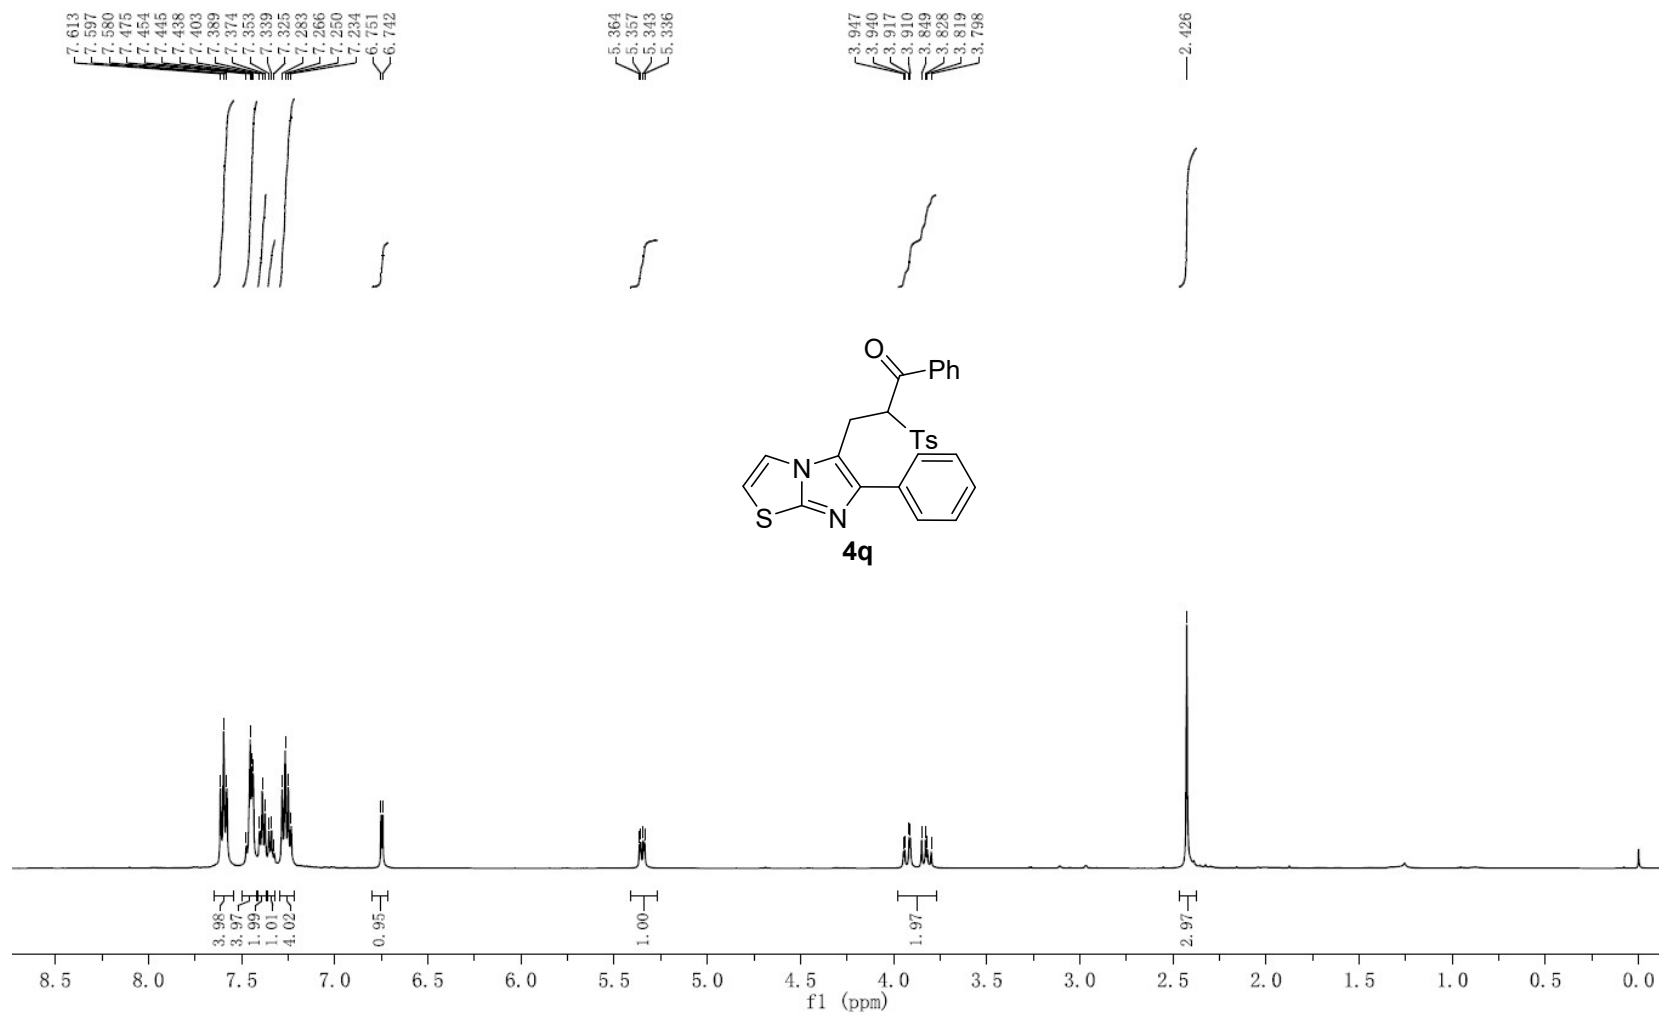



$^{13}\text{C}$  NMR (126 MHz,  $\text{CDCl}_3$ ) of **41**

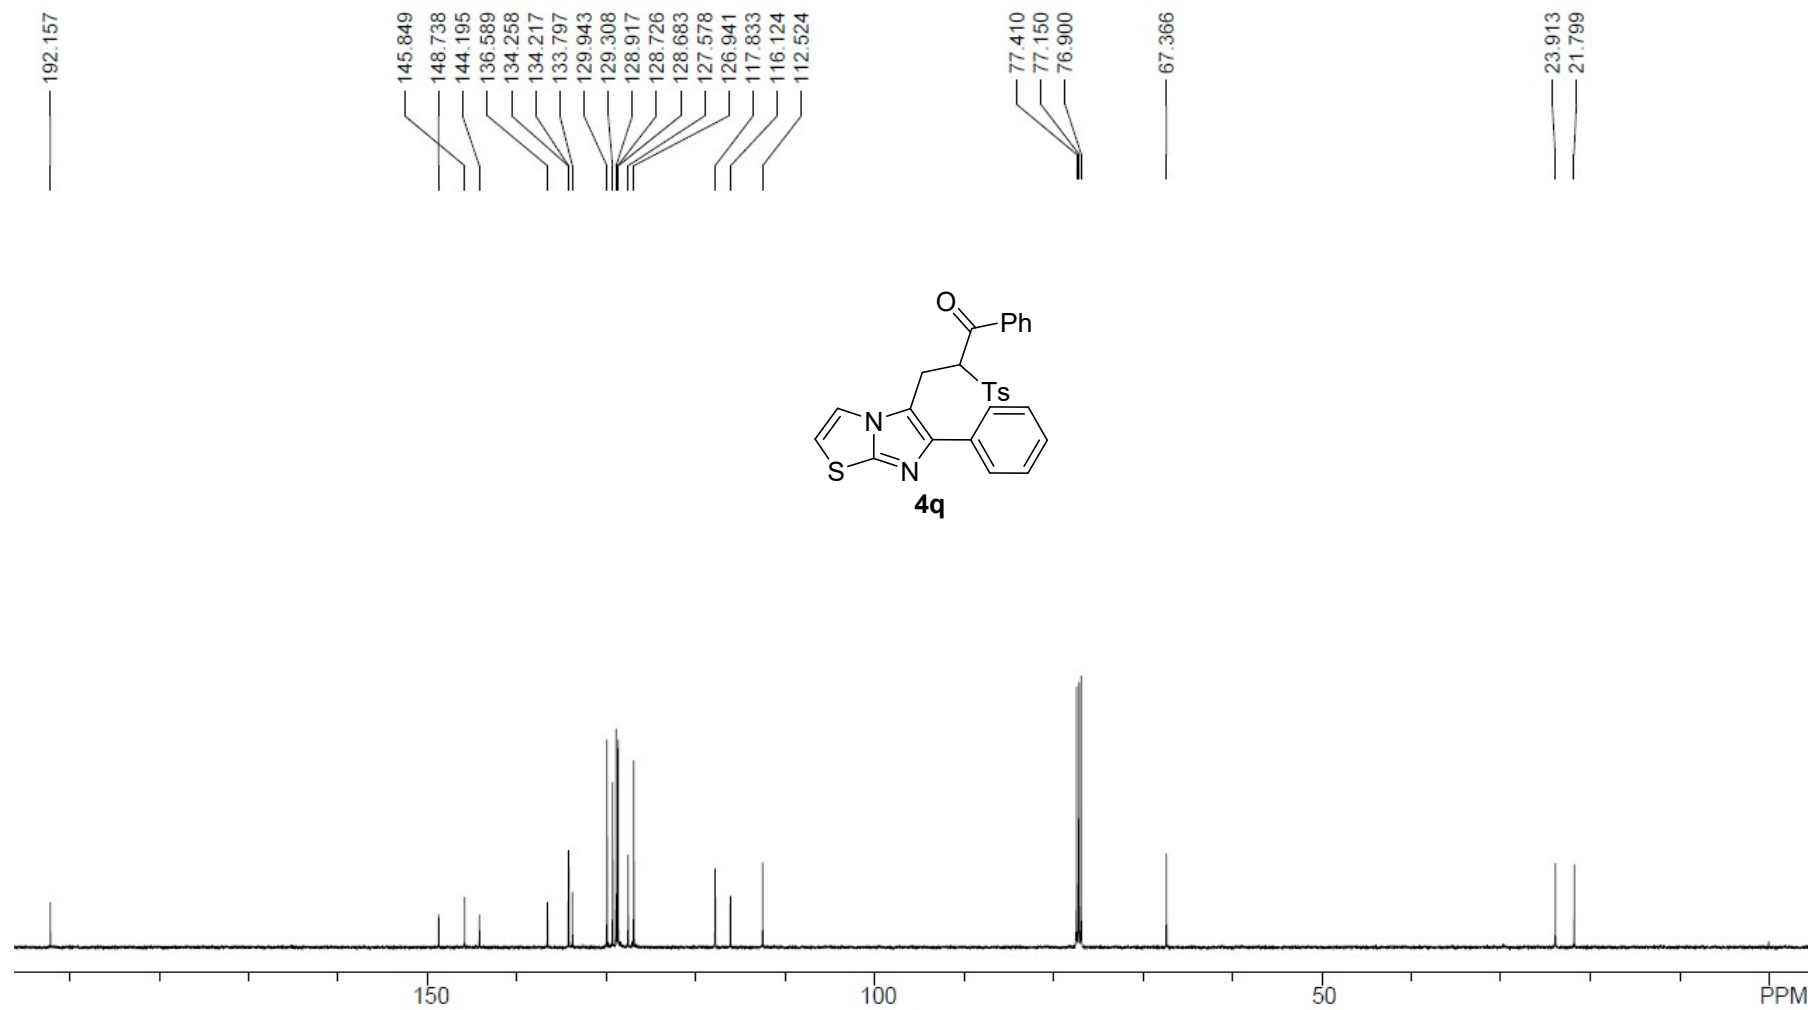

<sup>1</sup>H NMR (500 MHz, CDCl<sub>3</sub>) of **4r**

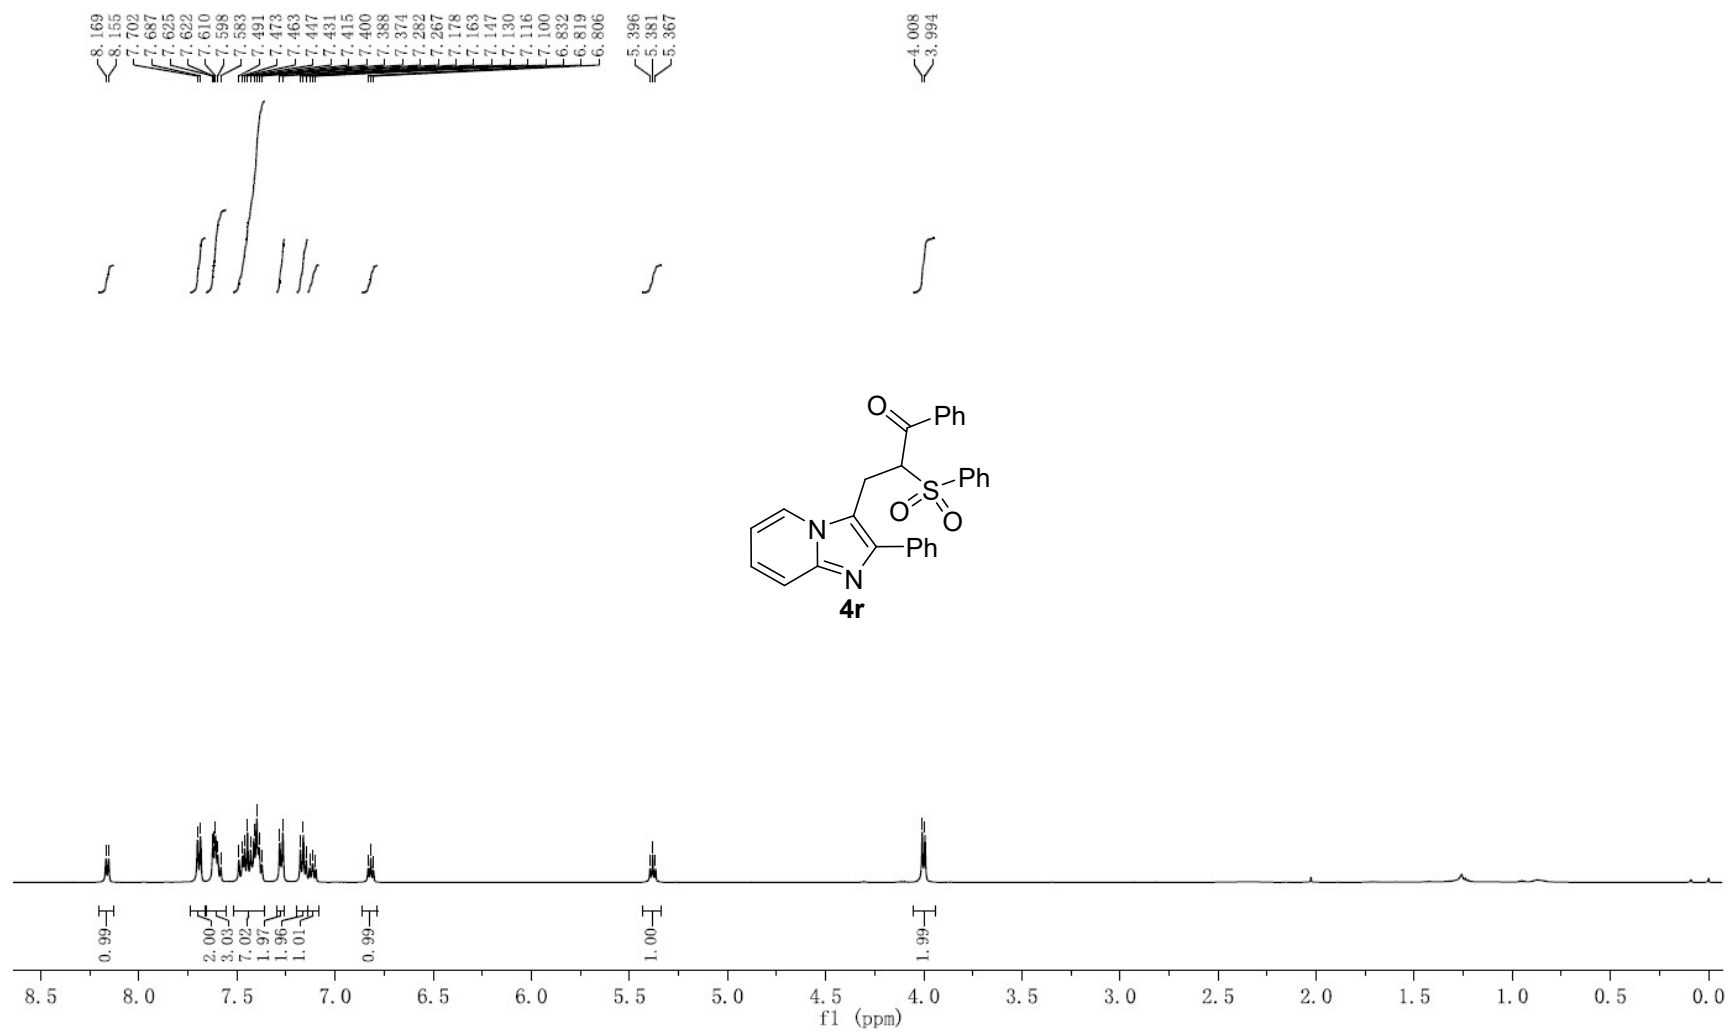

$^{13}\text{C}$  NMR (126 MHz,  $\text{CDCl}_3$ ) of **4r**

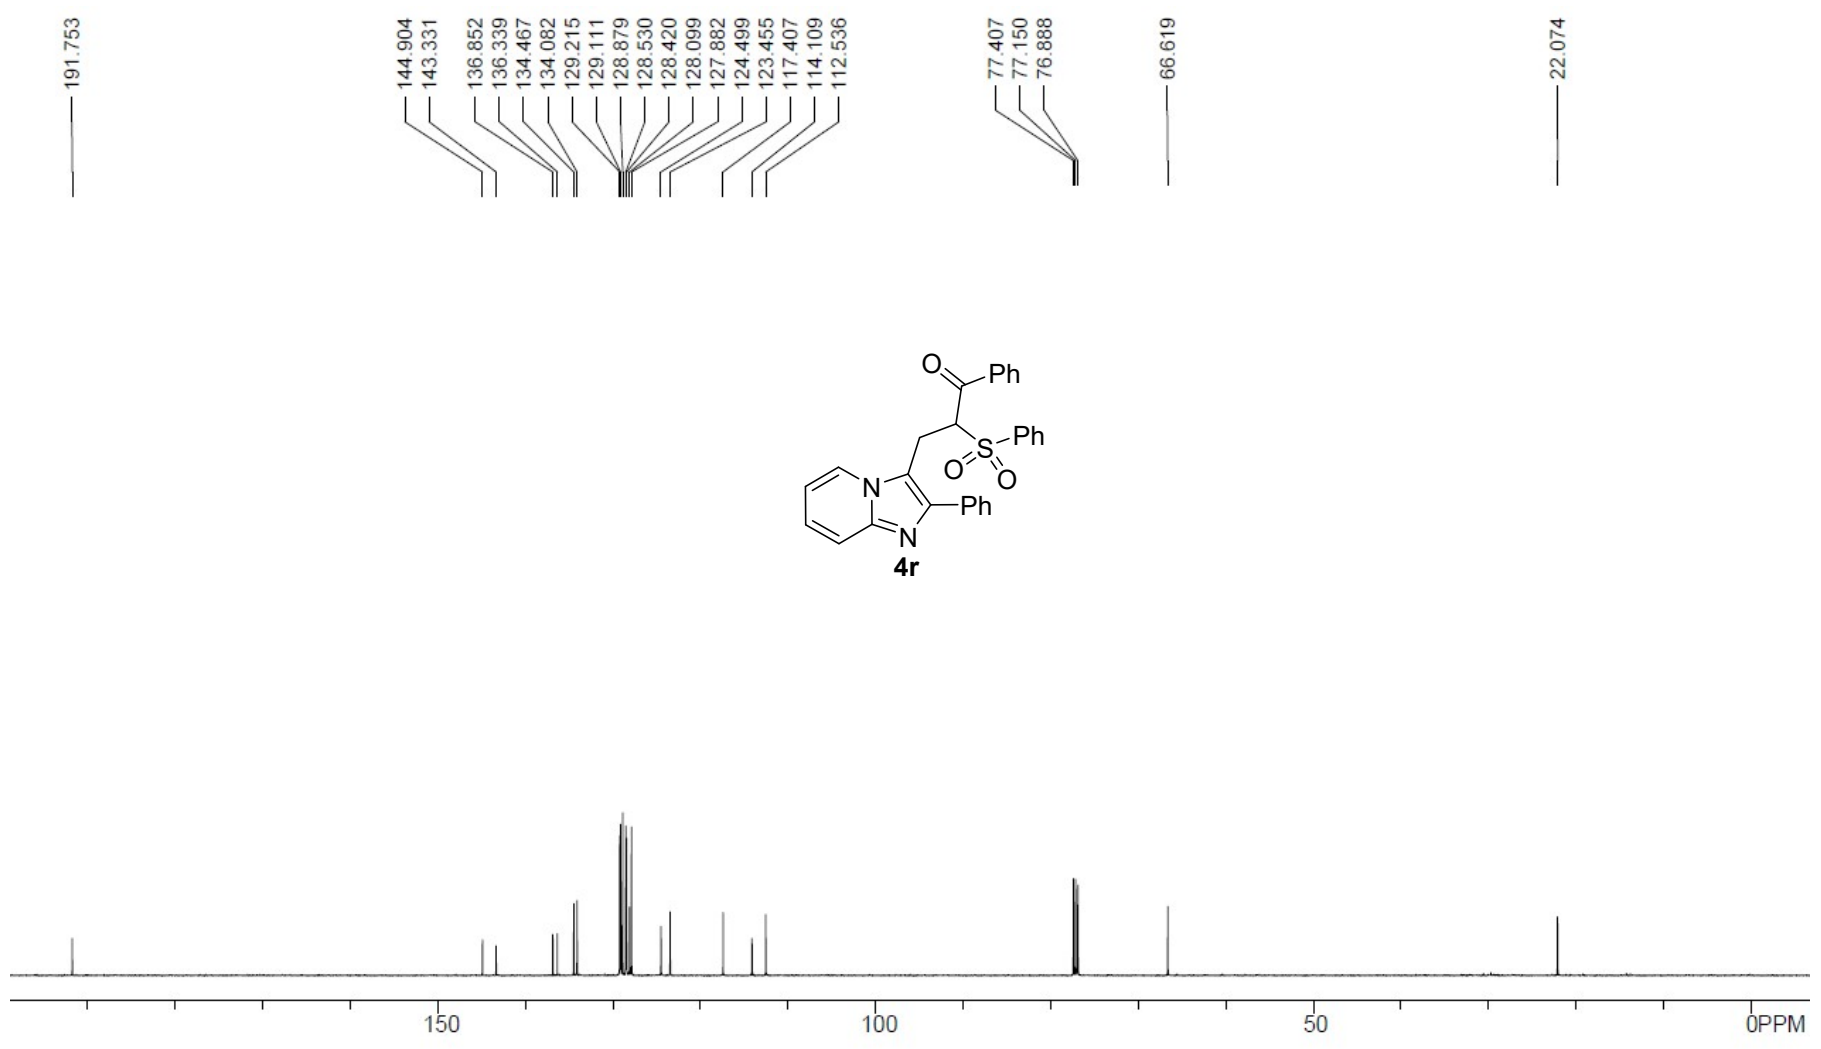

$^1\text{H}$  NMR (500 MHz,  $\text{CDCl}_3$ ) of **4s**

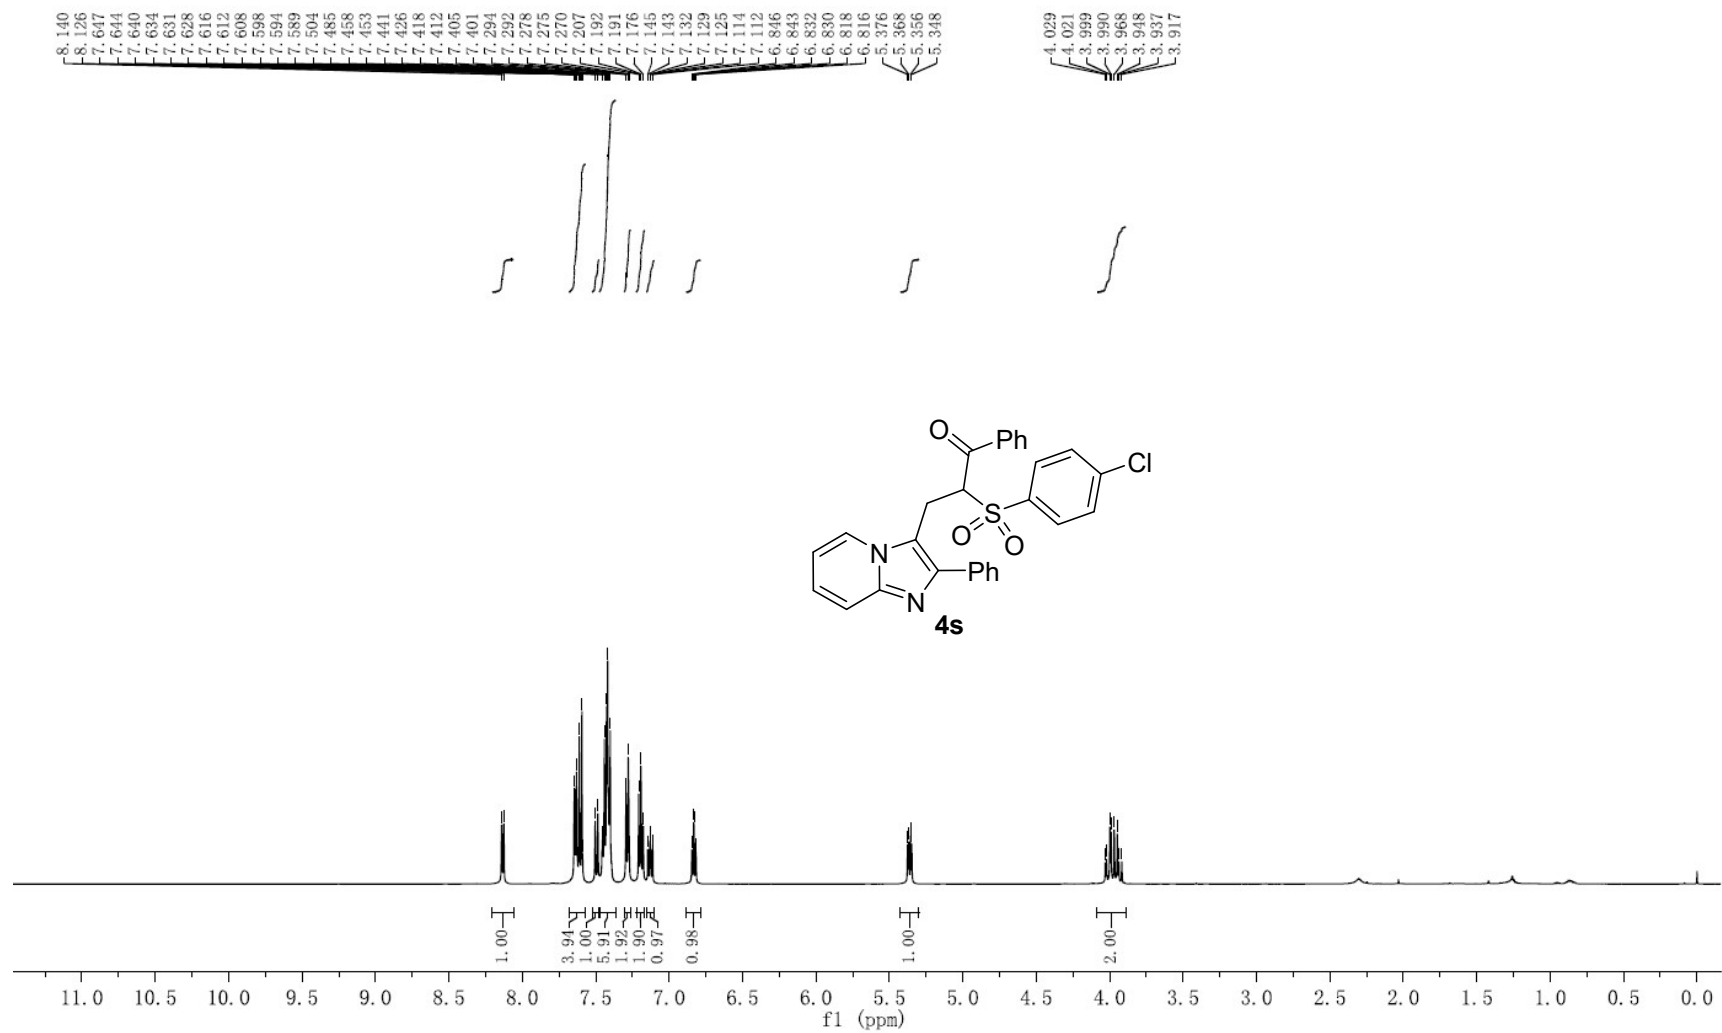

$^{13}\text{C}$  NMR (126 MHz,  $\text{CDCl}_3$ ) of **4s**

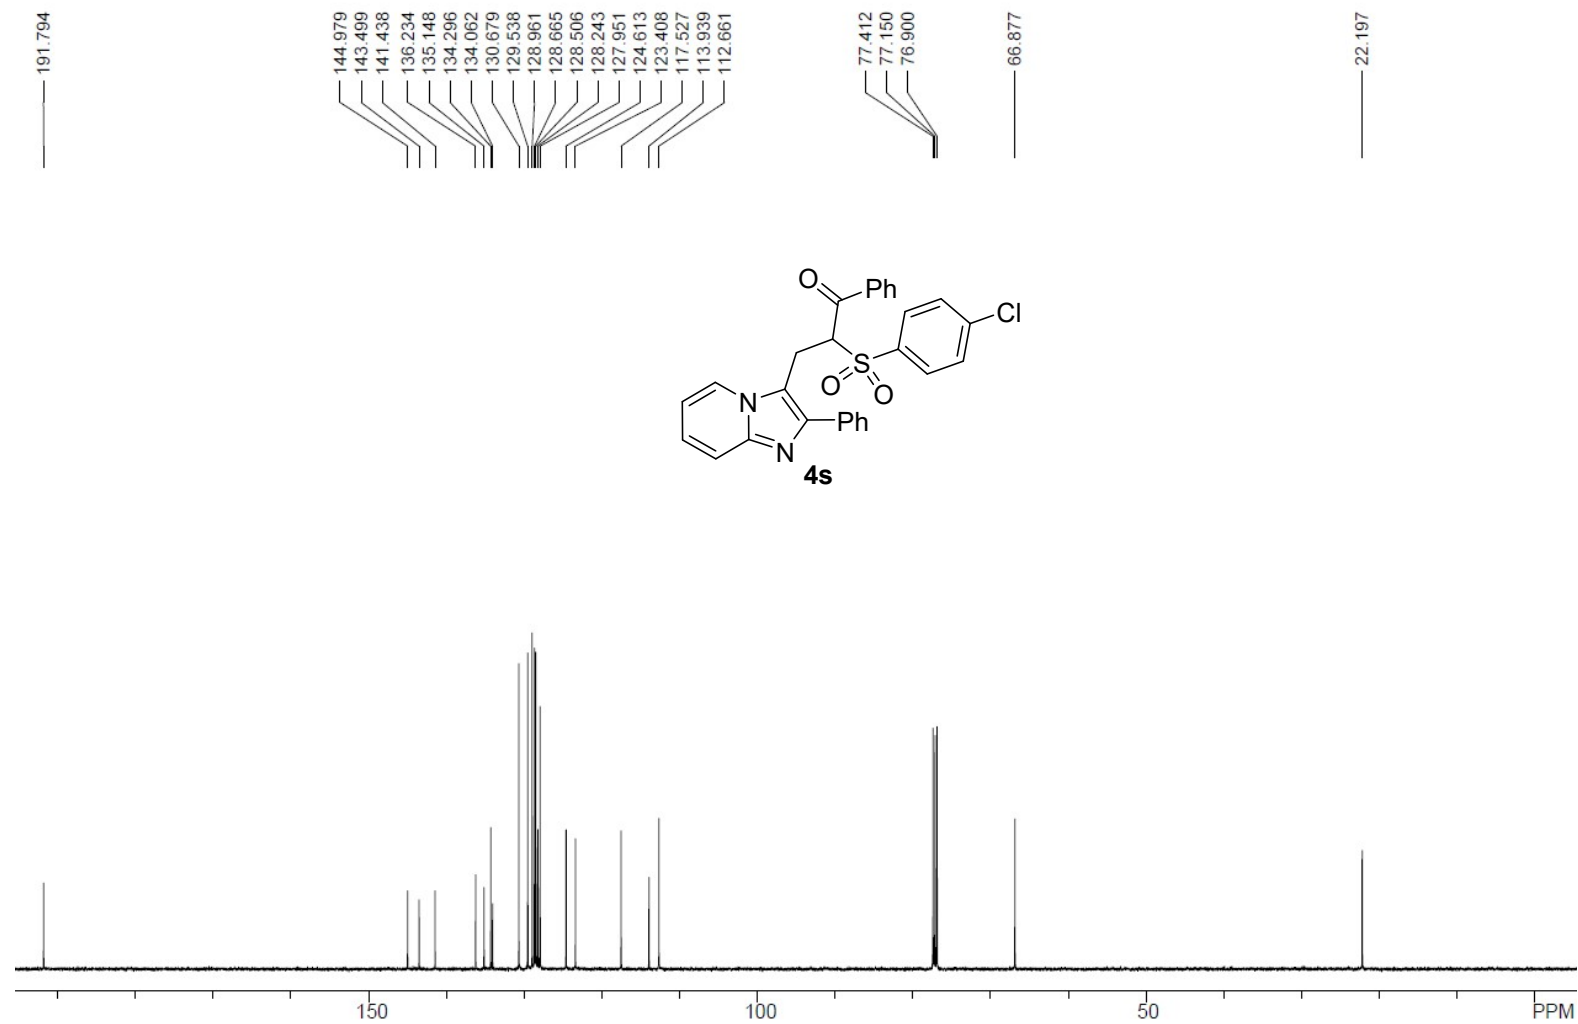

<sup>1</sup>H NMR (500 MHz, CDCl<sub>3</sub>) of **4t**

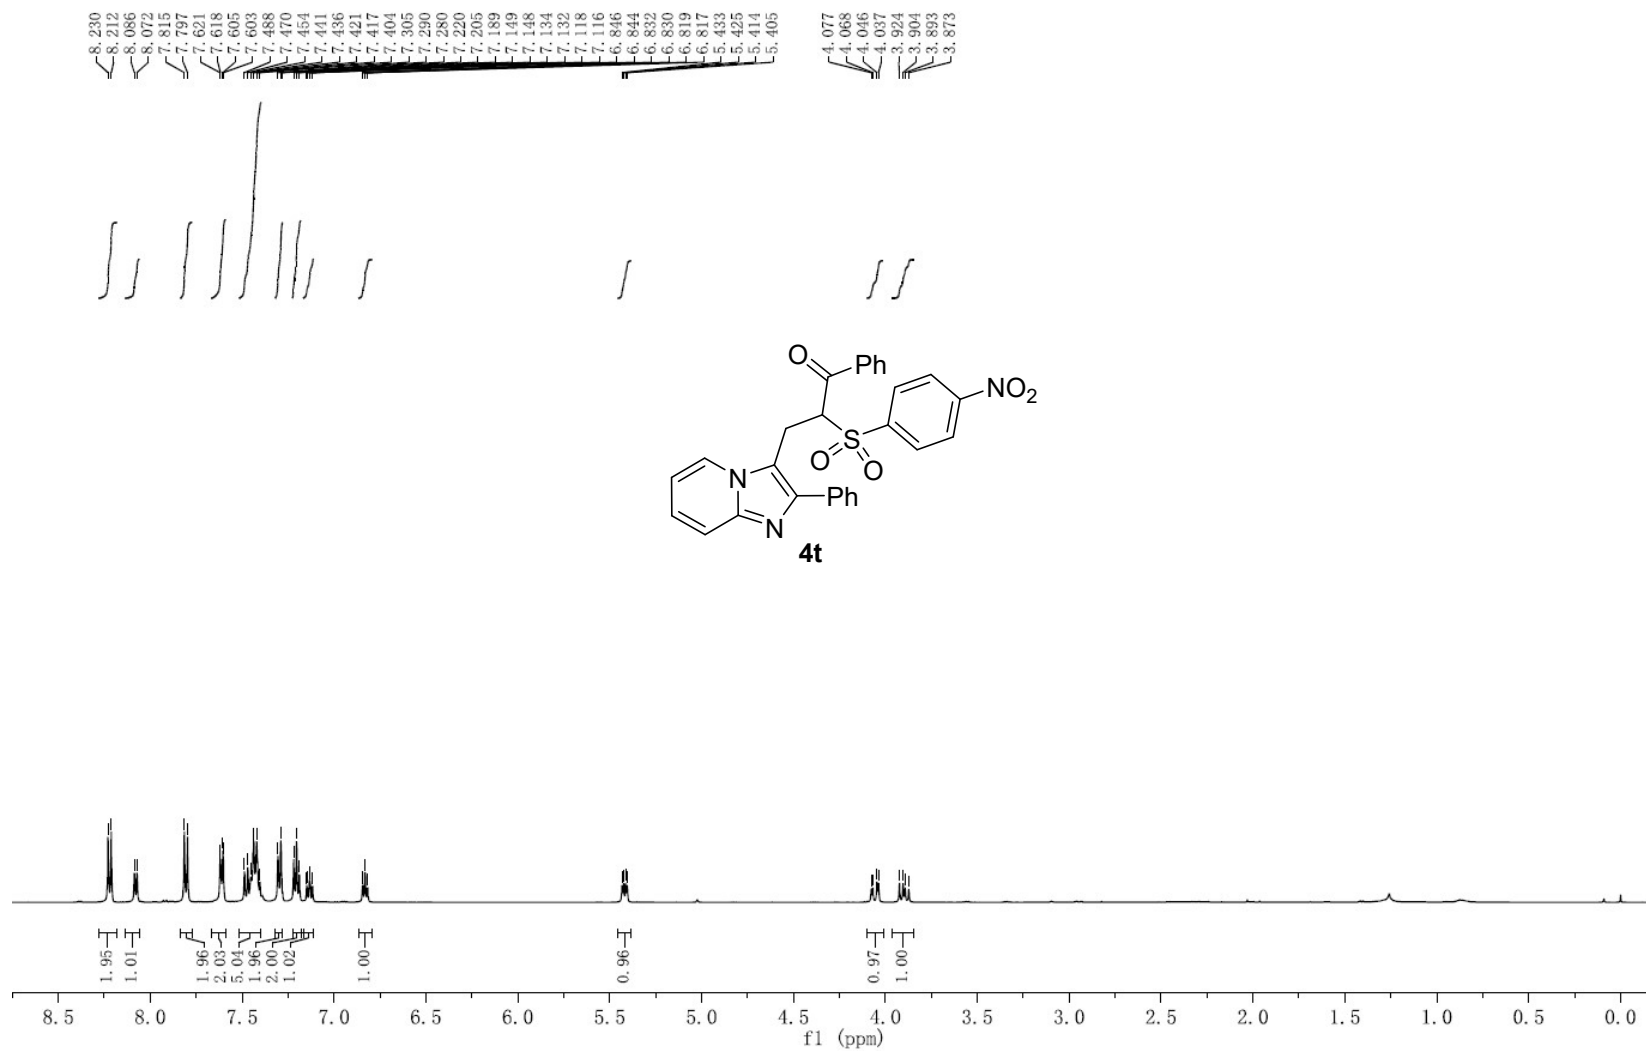

$^{13}\text{C}$  NMR (126 MHz,  $\text{CDCl}_3$ ) of **4t**

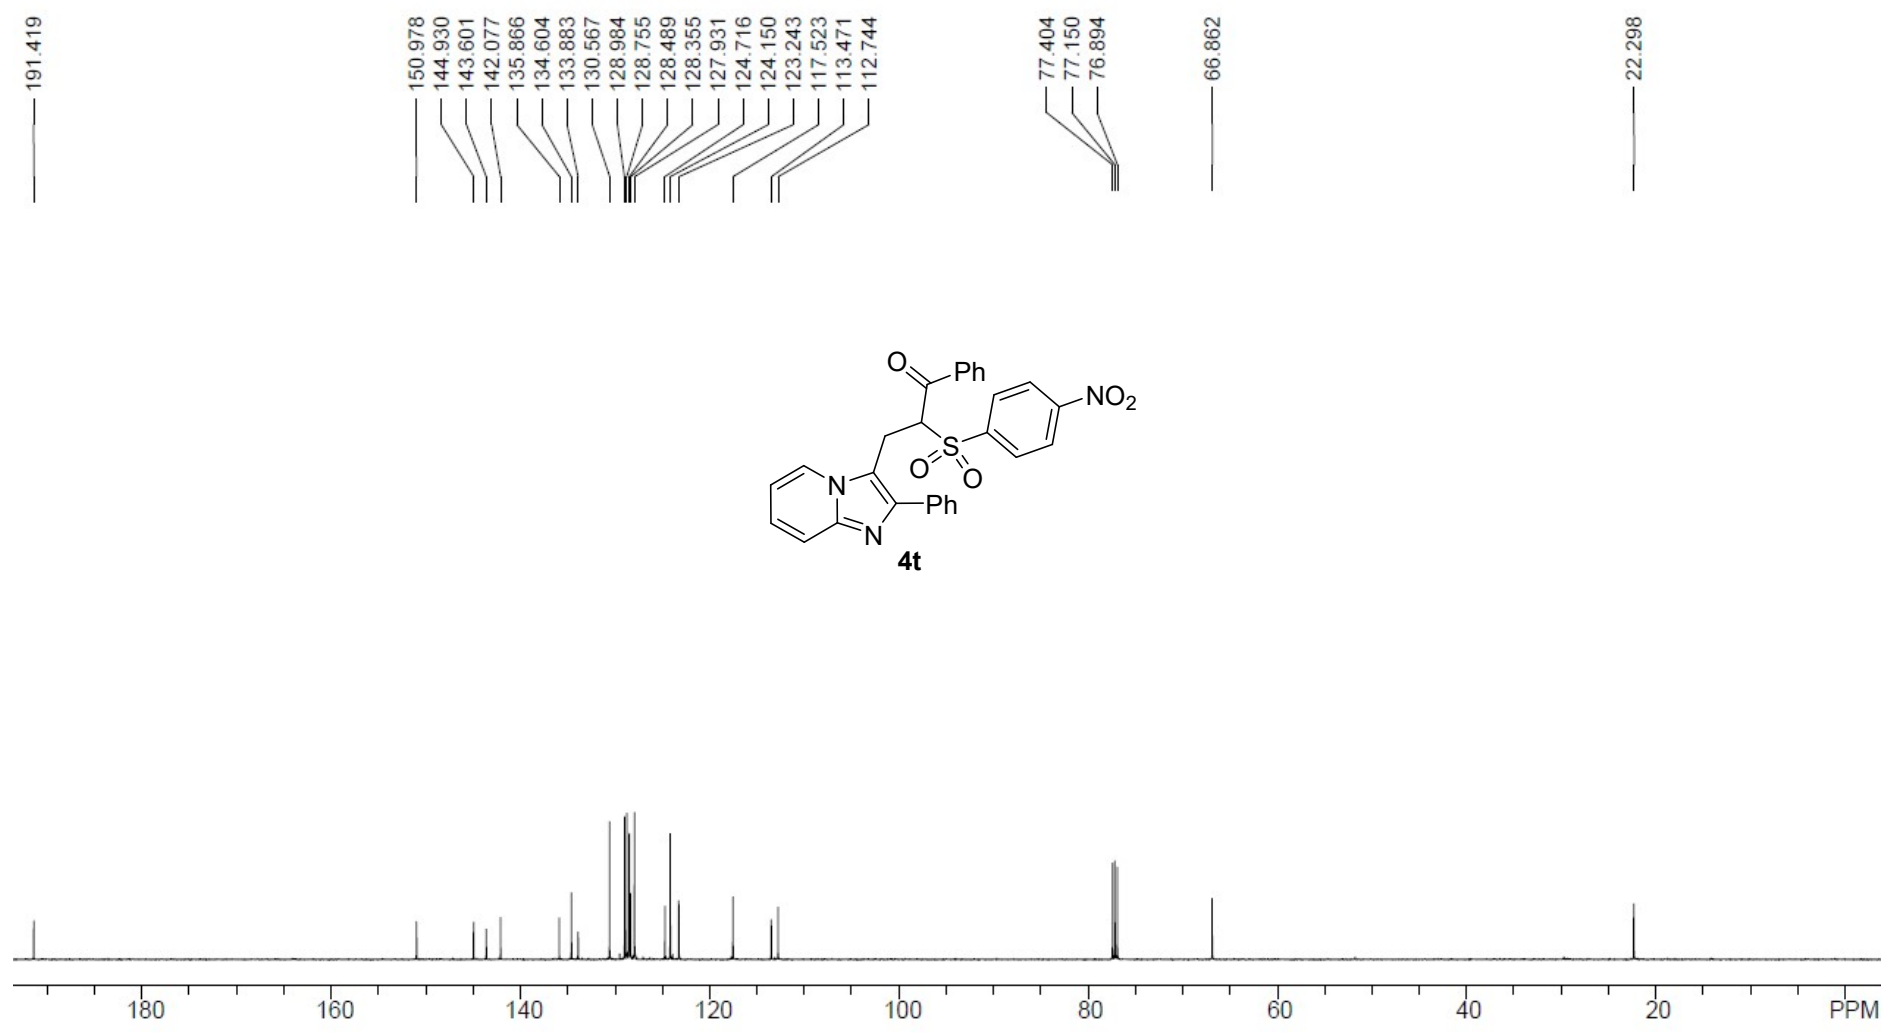

<sup>1</sup>H NMR (500 MHz, CDCl<sub>3</sub>) of **4u**

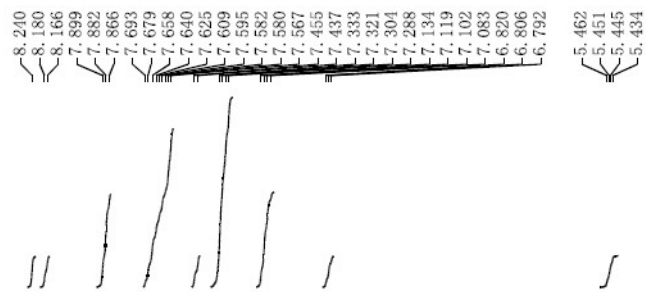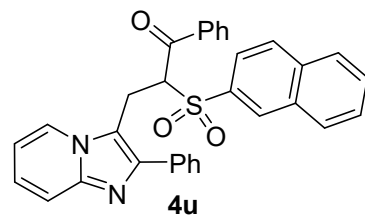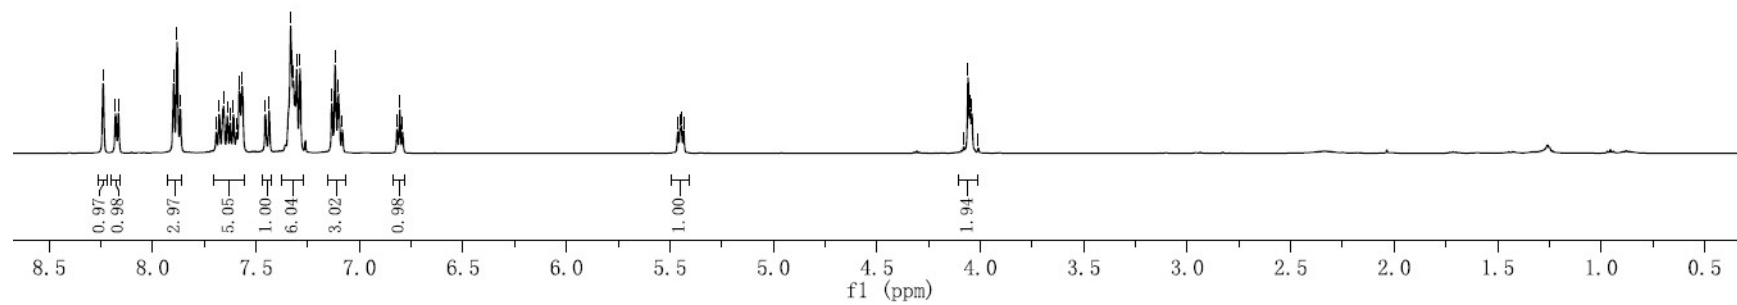



$^{13}\text{C}$  NMR (126 MHz,  $\text{CDCl}_3$ ) of **4u**

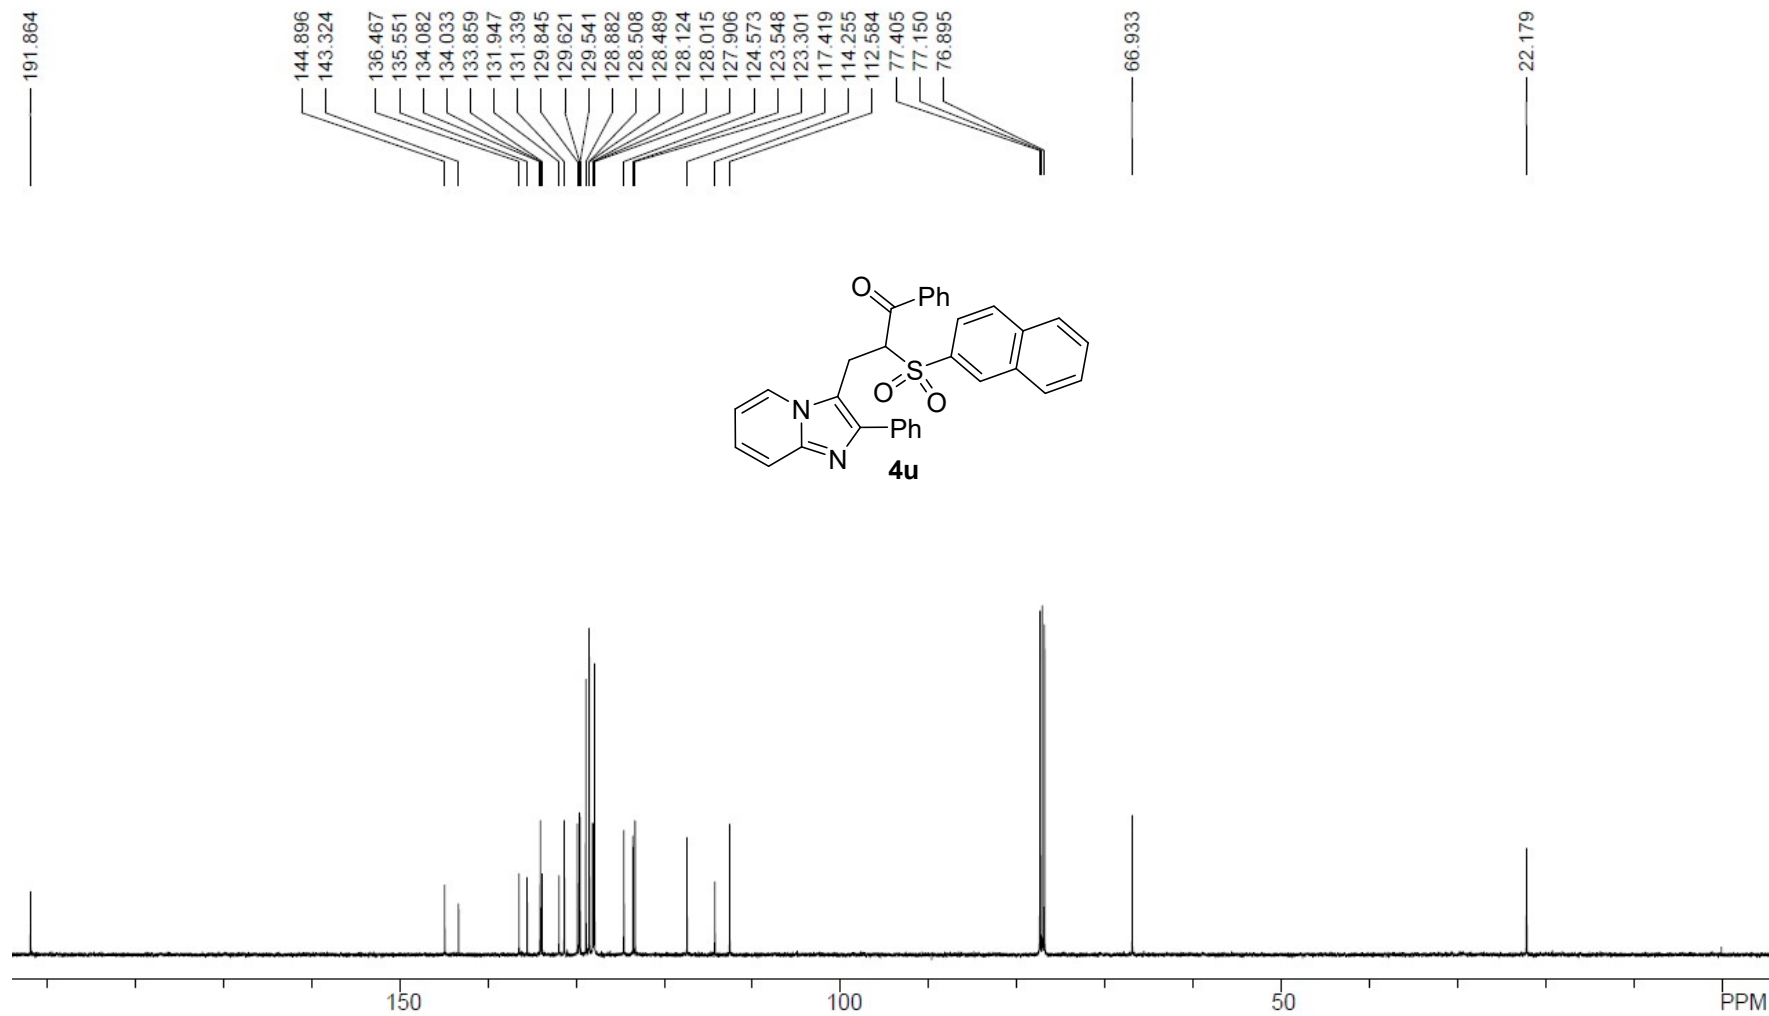

$^1\text{H}$  NMR (500 MHz,  $\text{CDCl}_3$ ) of **4v**

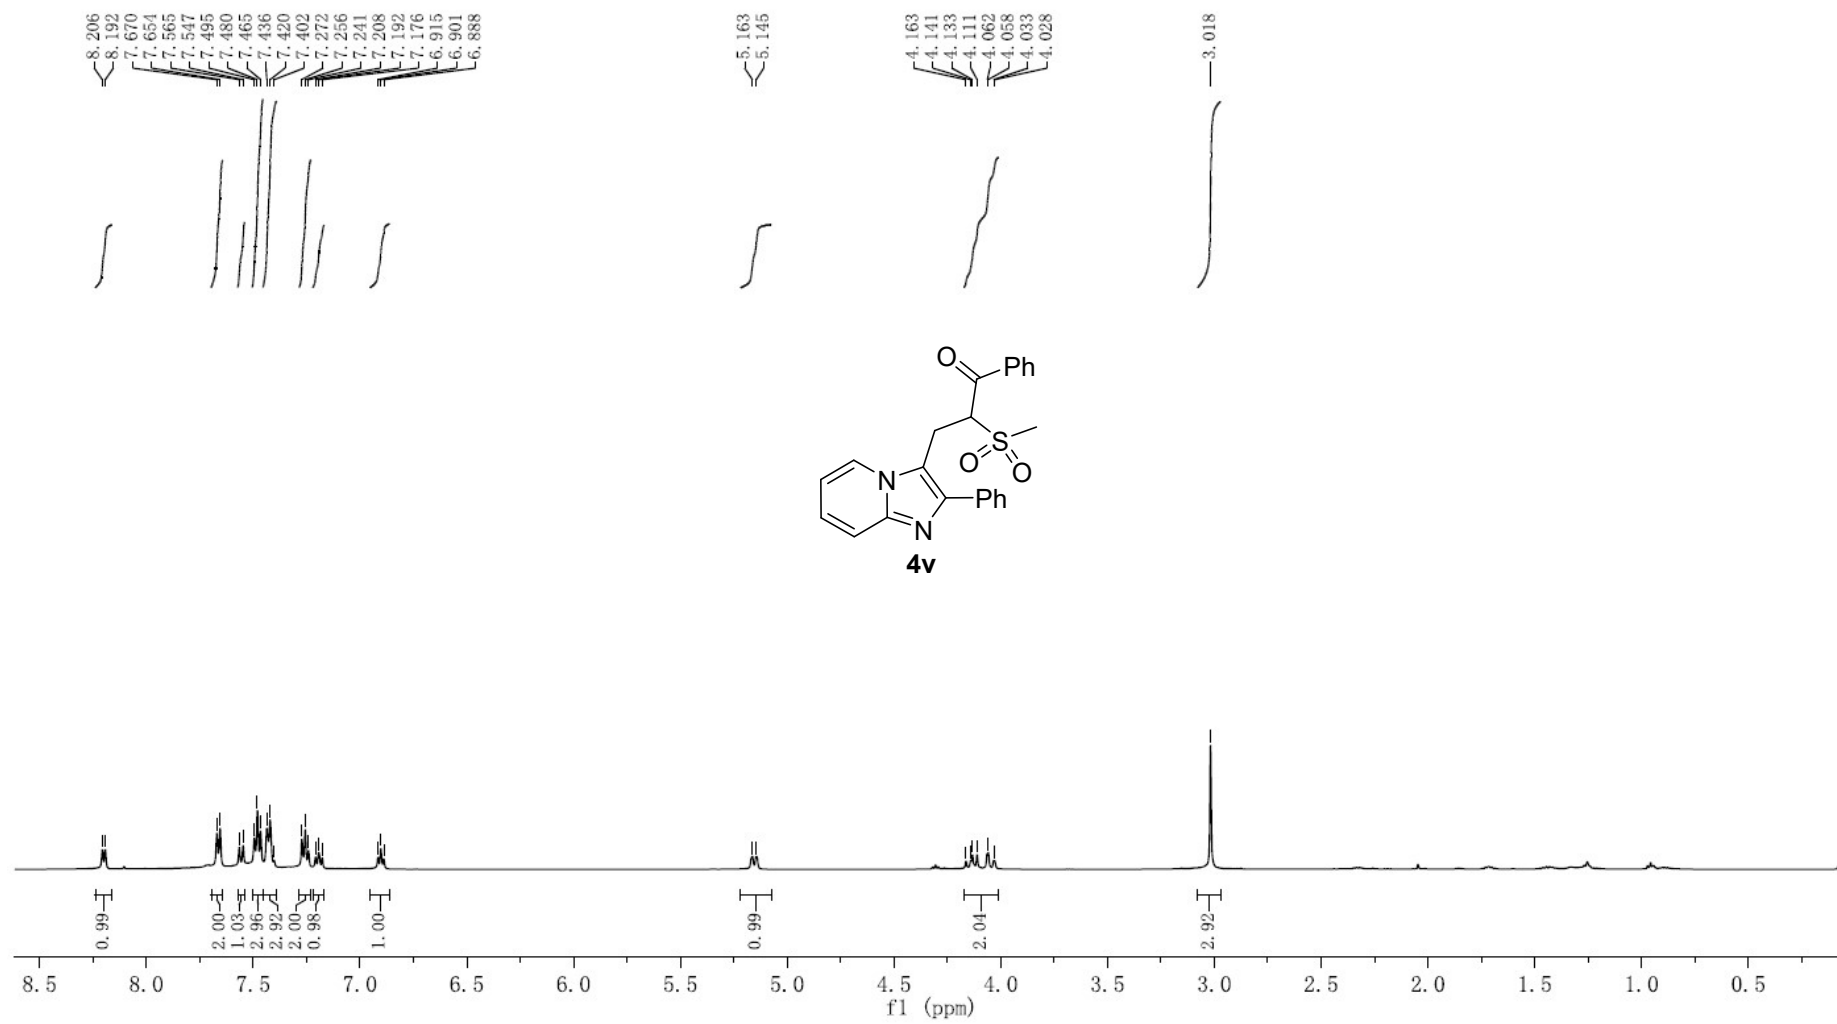

$^{13}\text{C}$  NMR (126 MHz,  $\text{CDCl}_3$ ) of **4v**

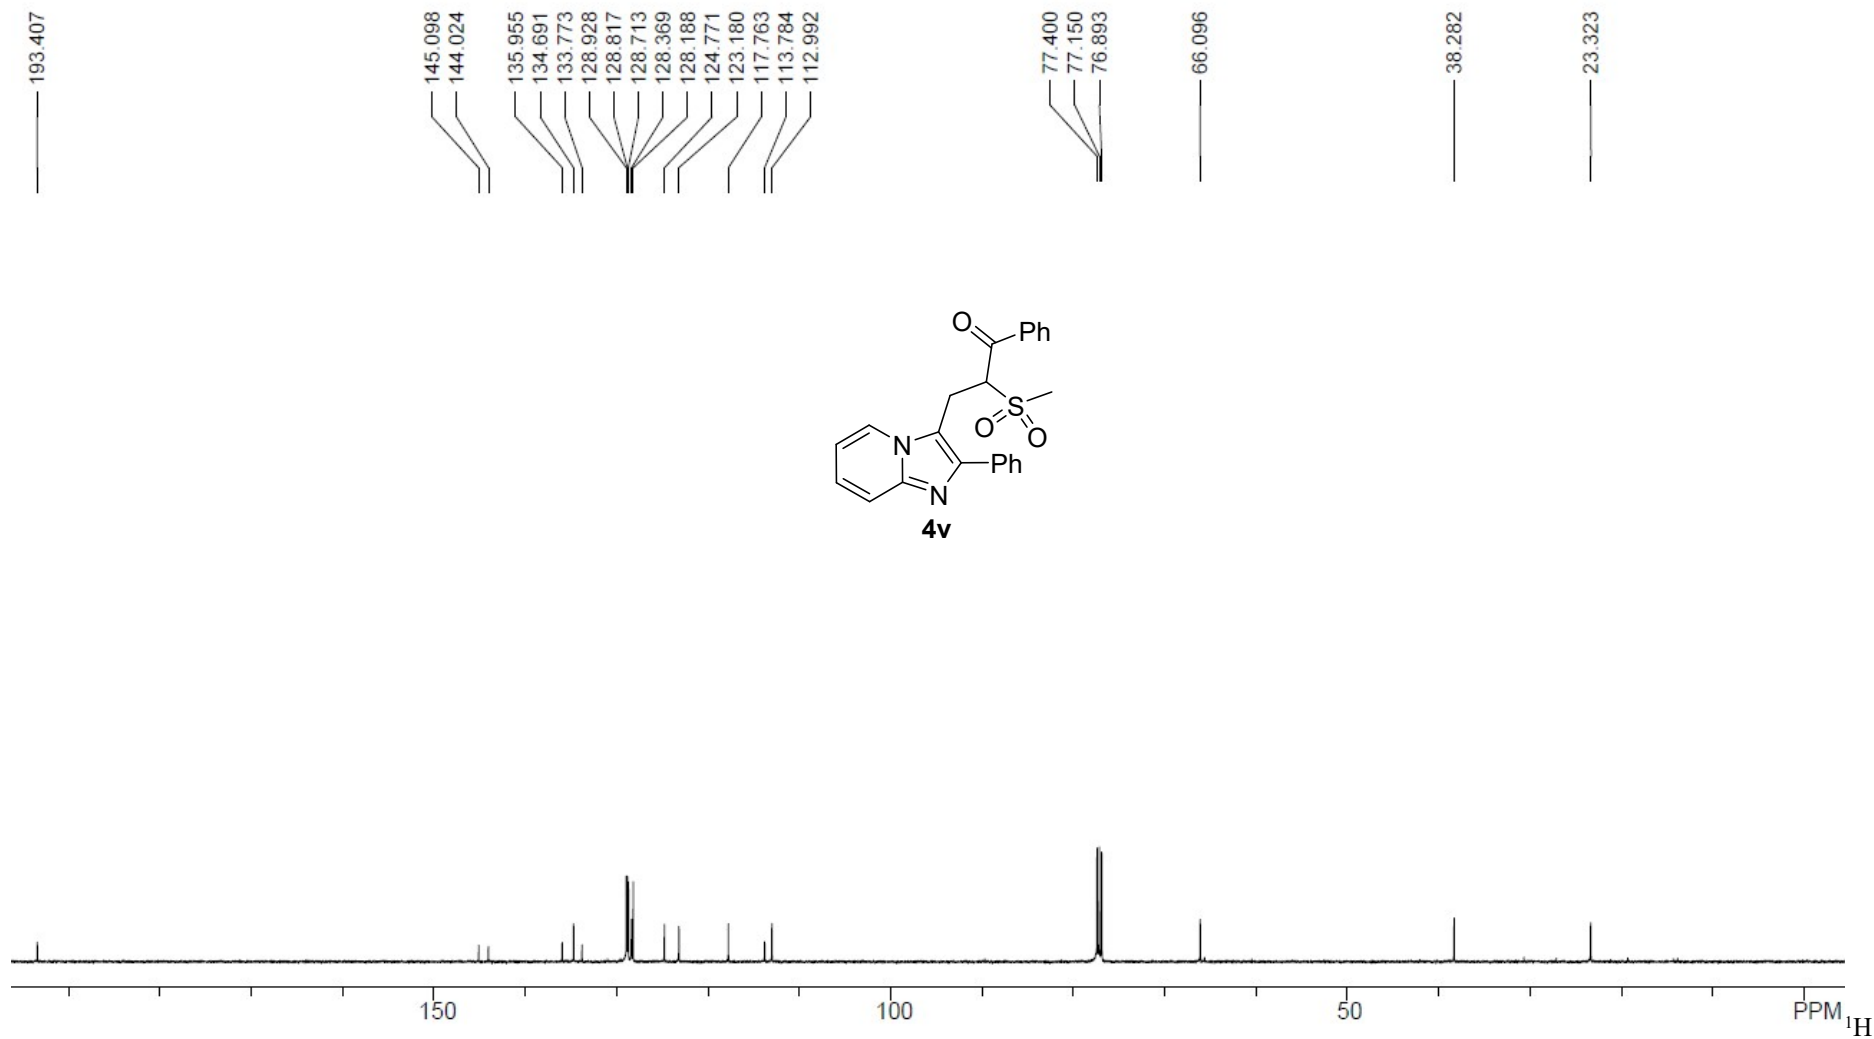

NMR (500 MHz, CDCl<sub>3</sub>) of **4w**

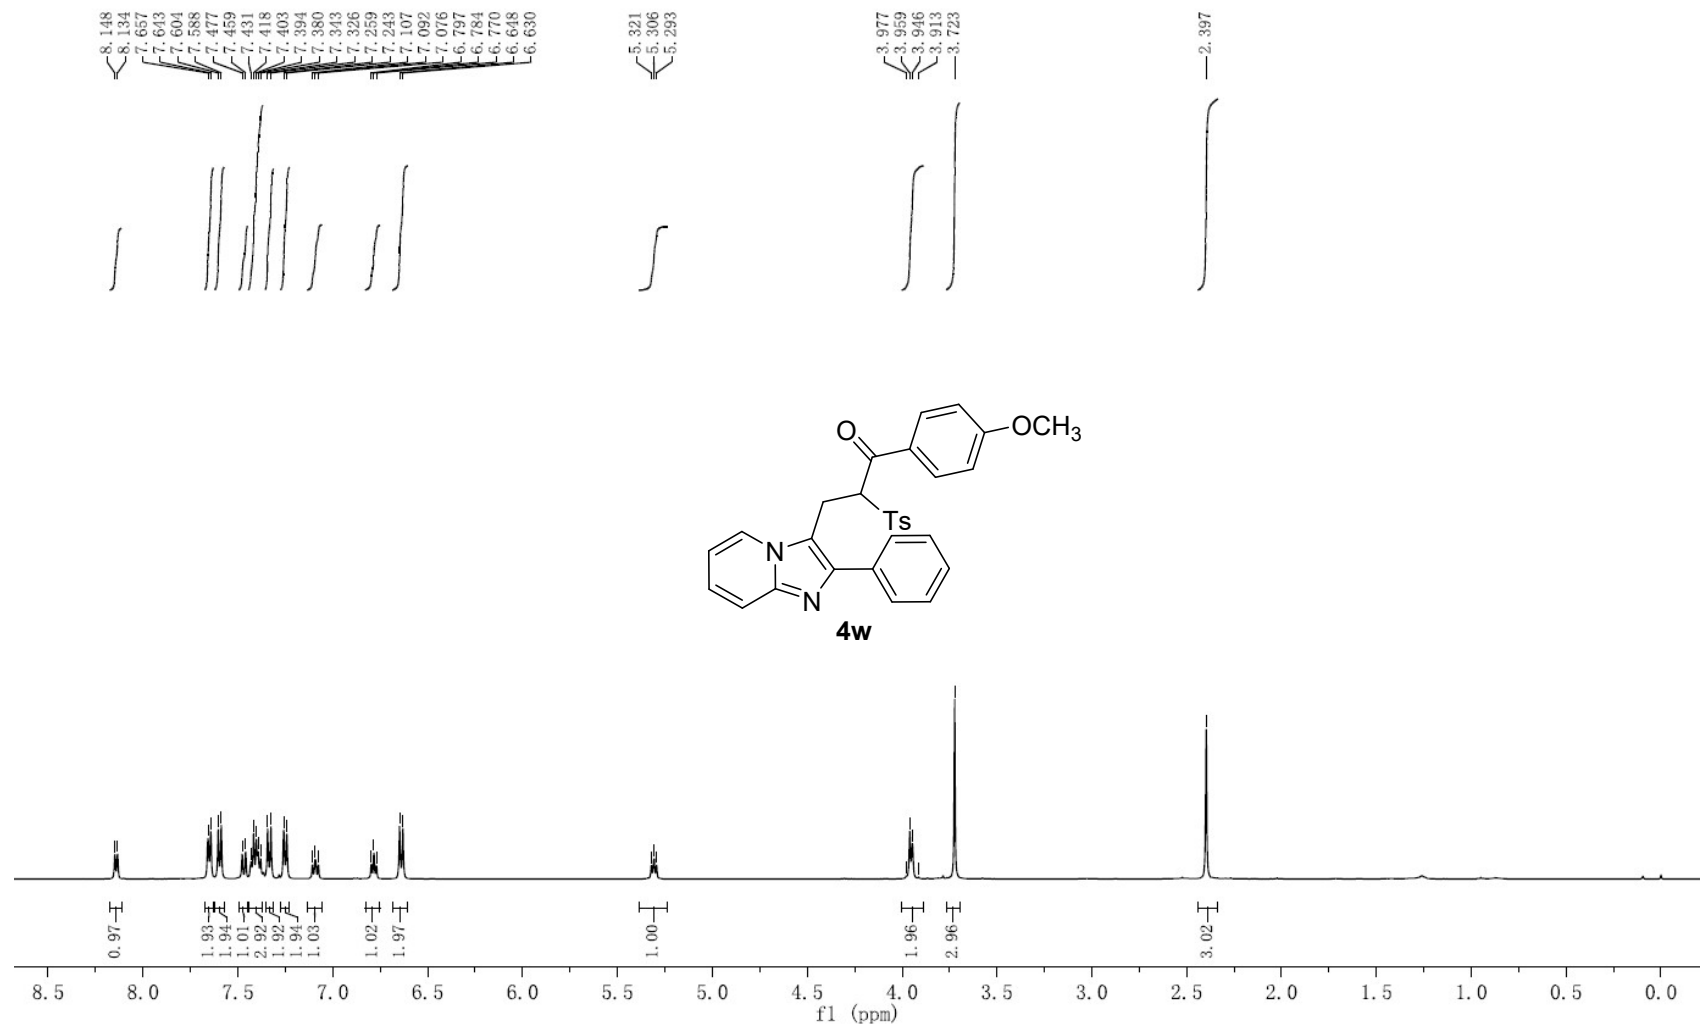

$^{13}\text{C}$  NMR (126 MHz,  $\text{CDCl}_3$ ) of **4w**

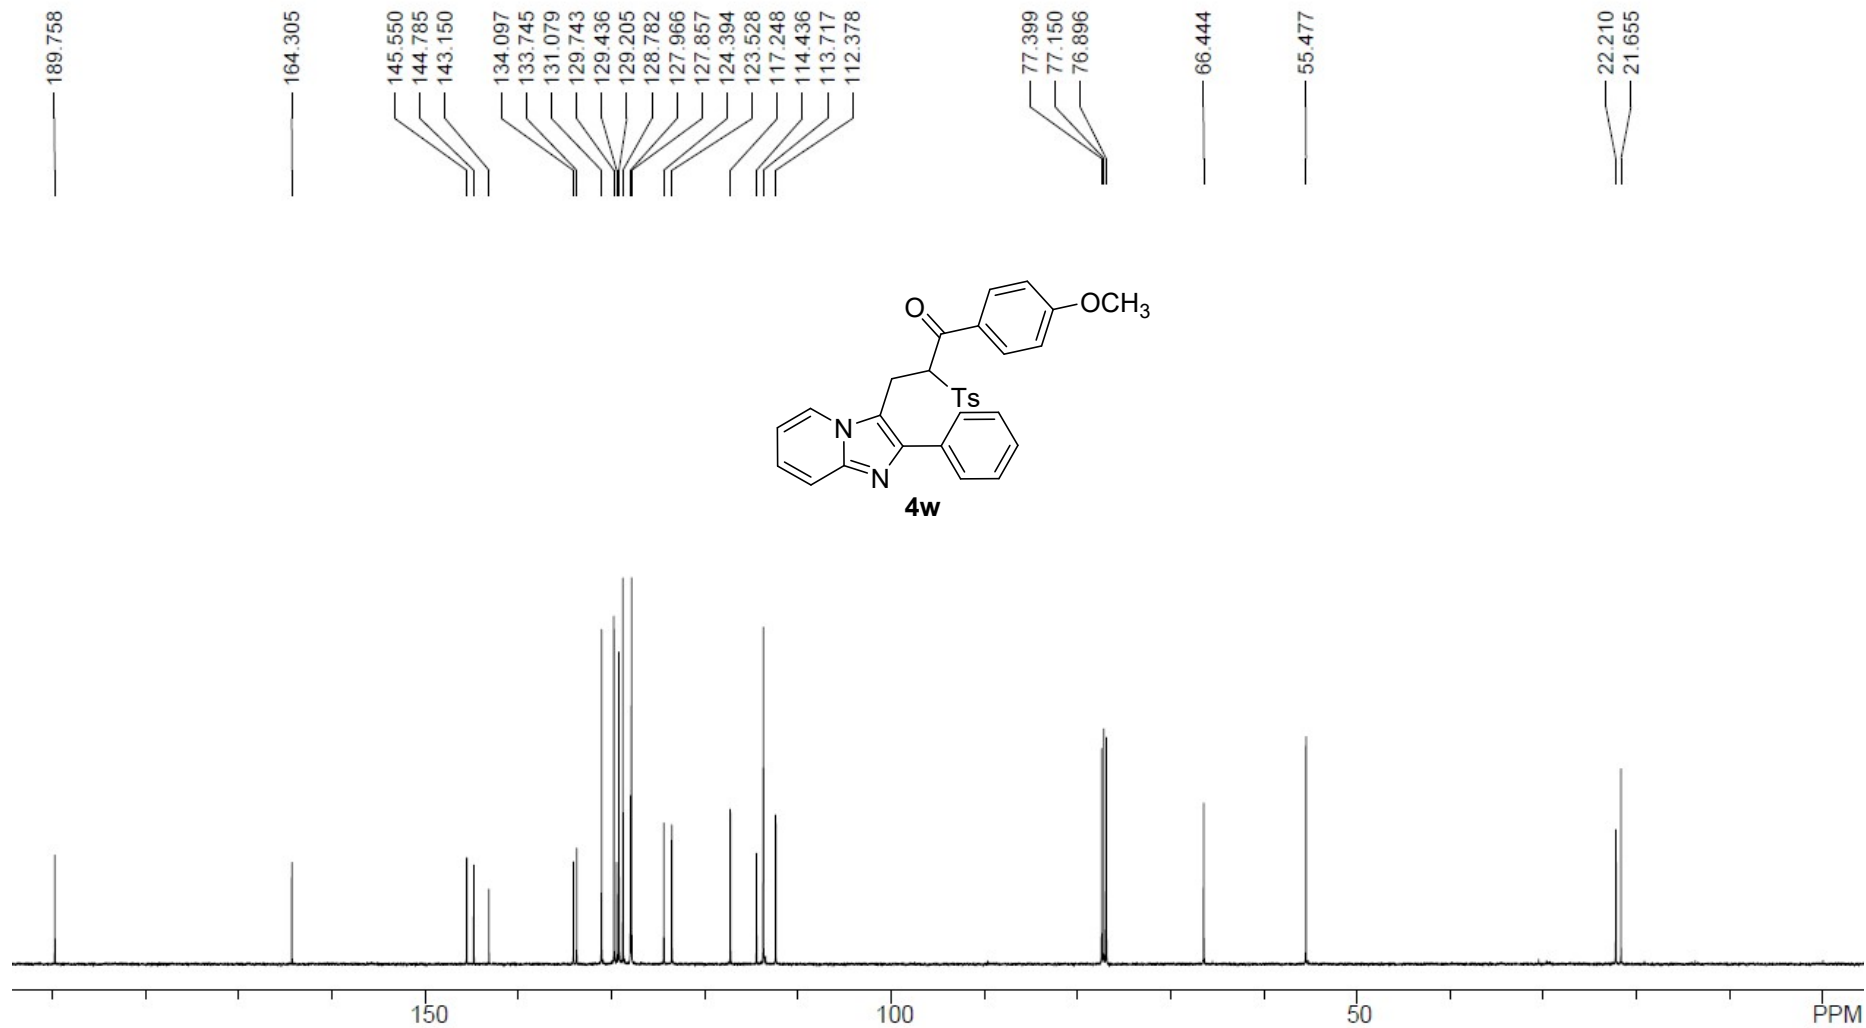

<sup>1</sup>H NMR (500 MHz, CDCl<sub>3</sub>) of **4x**

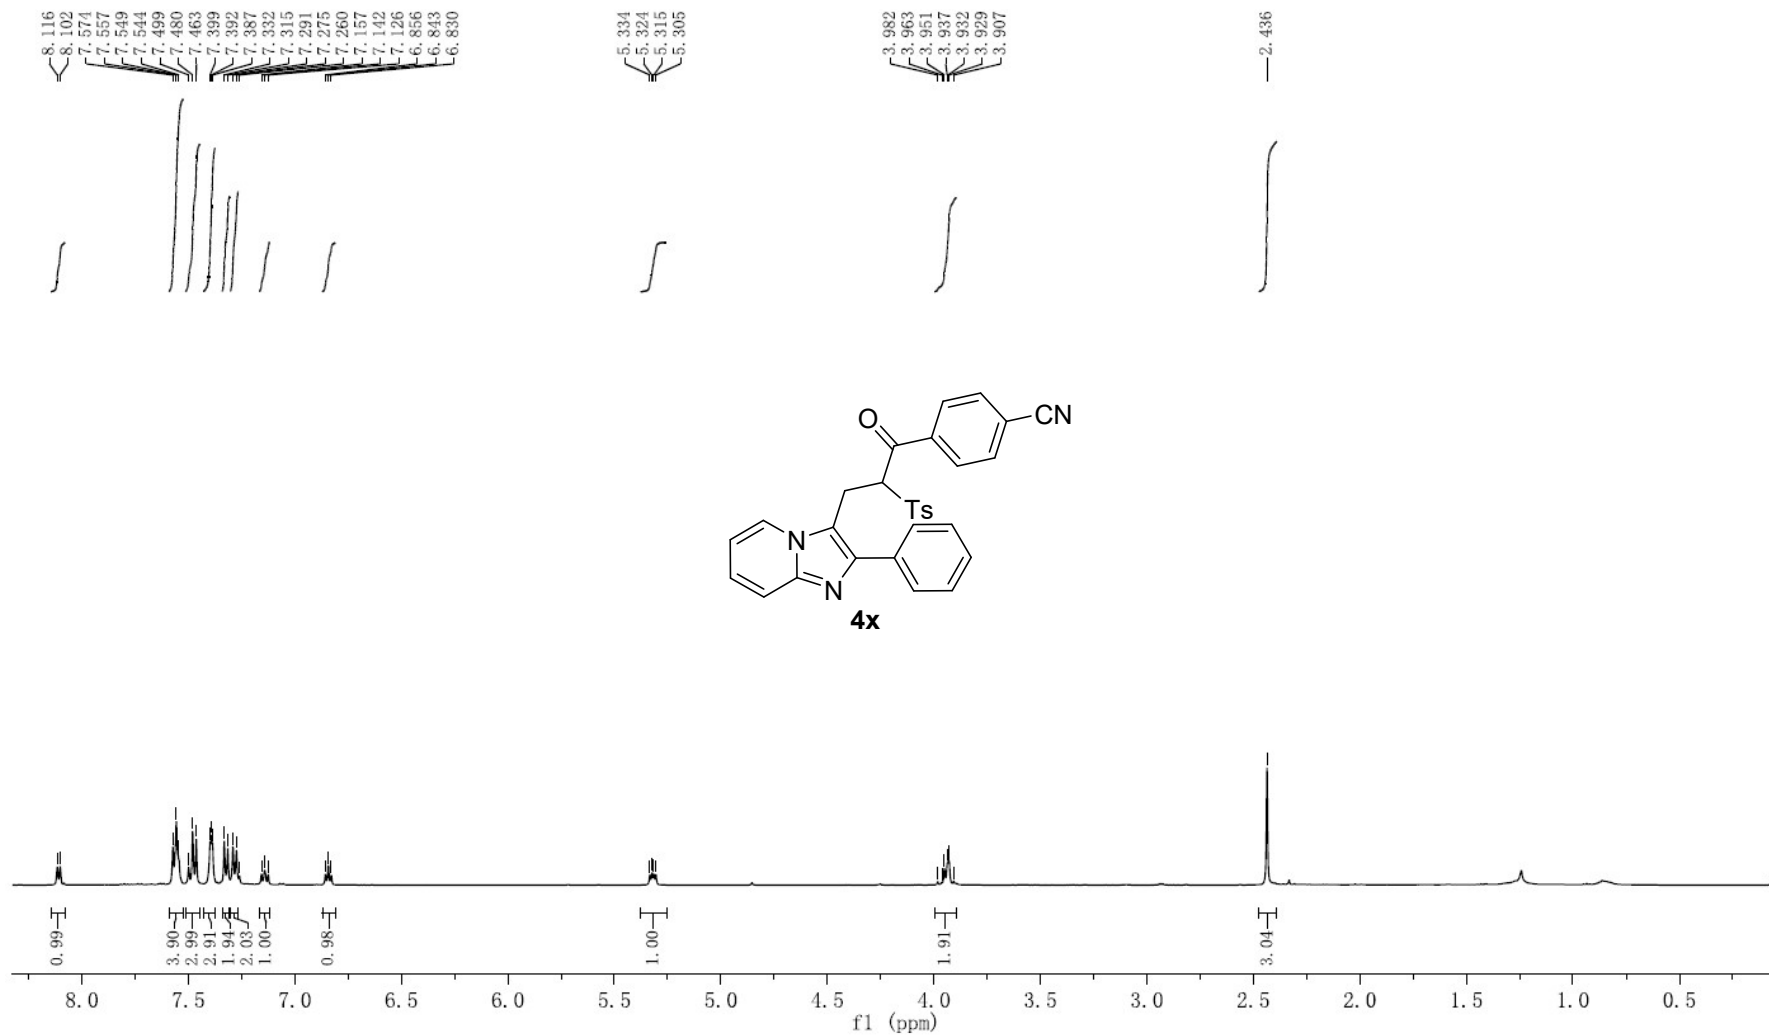

$^{13}\text{C}$  NMR (126 MHz,  $\text{CDCl}_3$ ) of **4x**

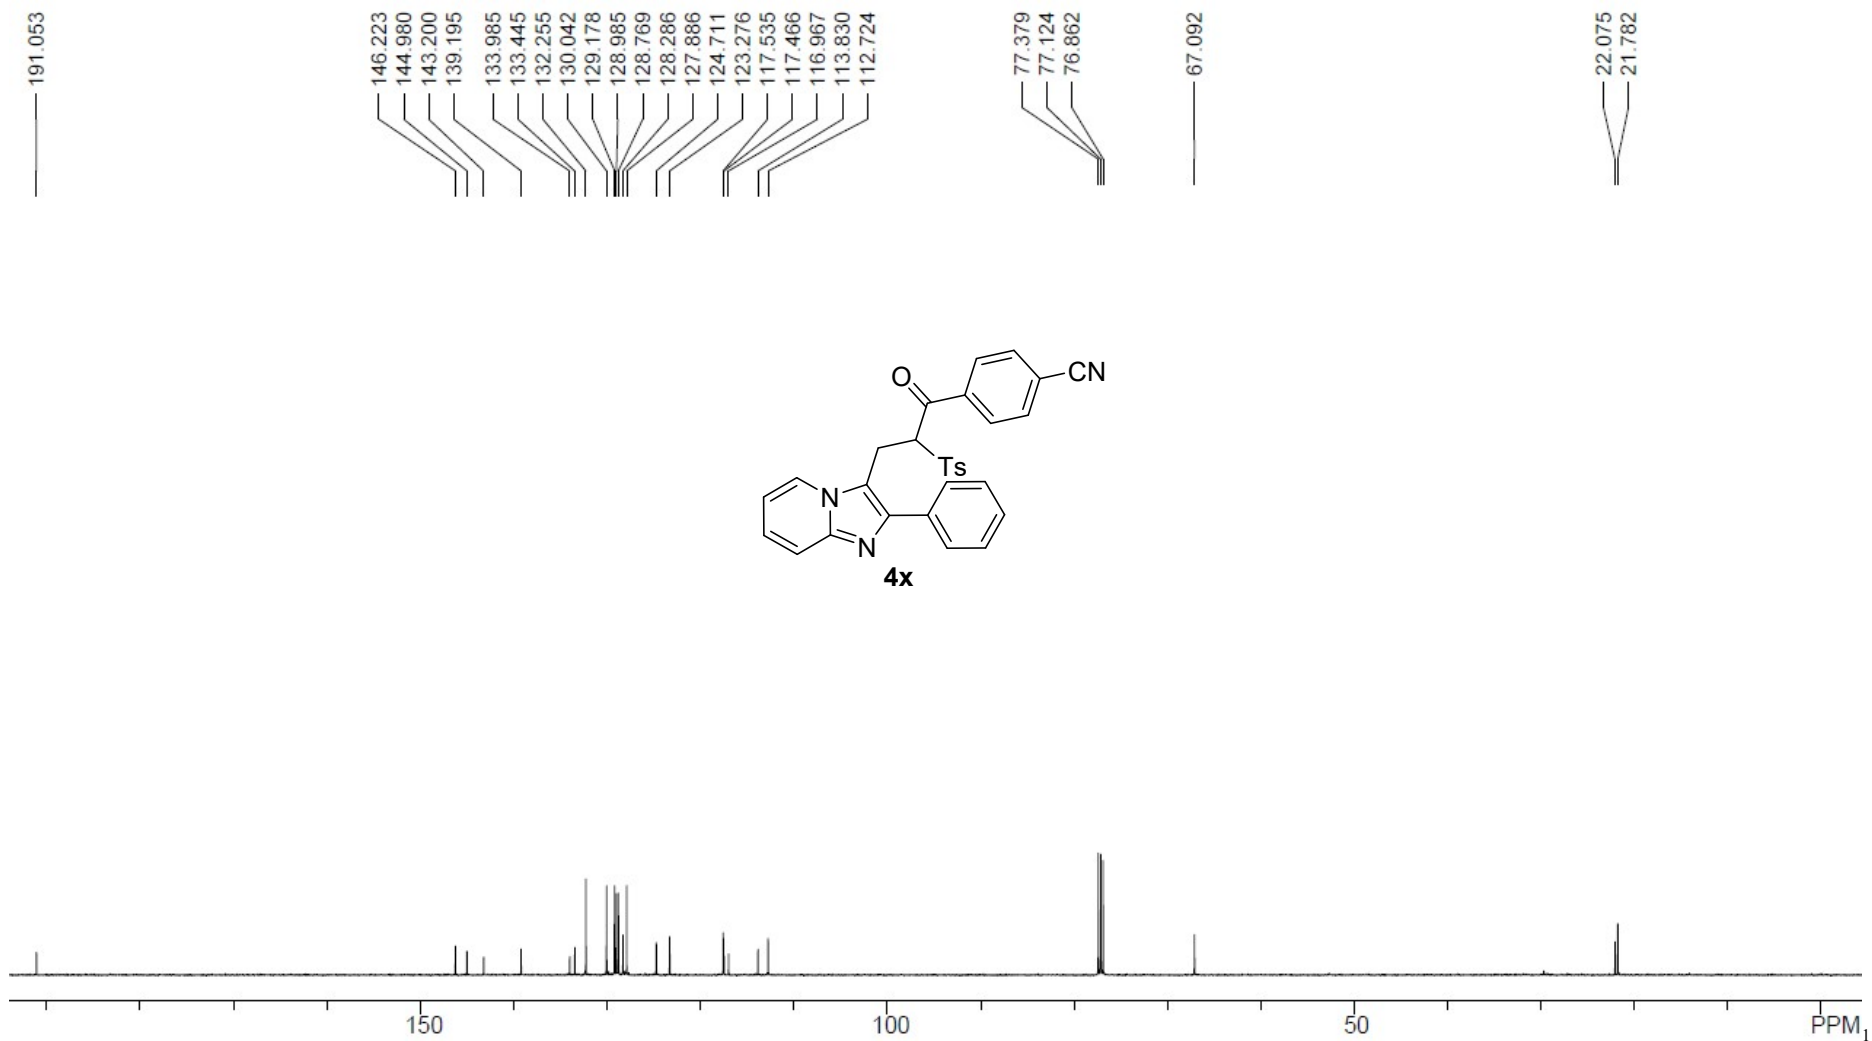



H NMR (500 MHz, CDCl<sub>3</sub>) of **4y**

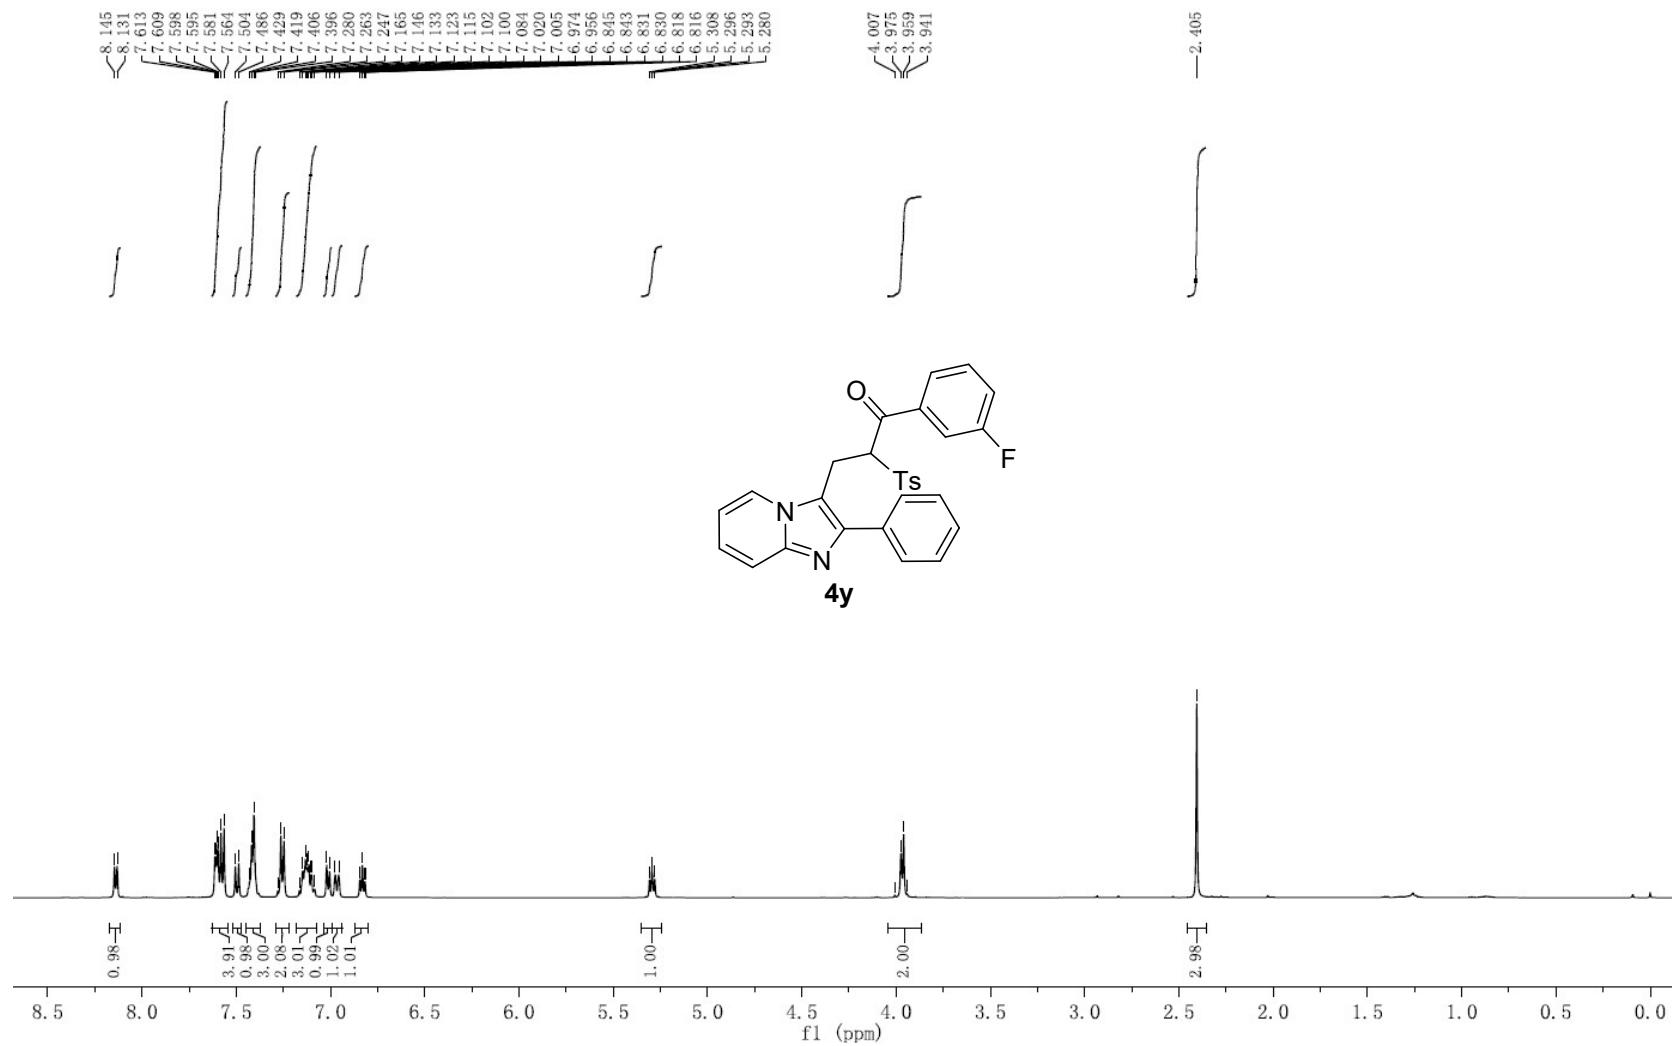

$^{13}\text{C}$  NMR (126 MHz,  $\text{CDCl}_3$ ) of **4y**

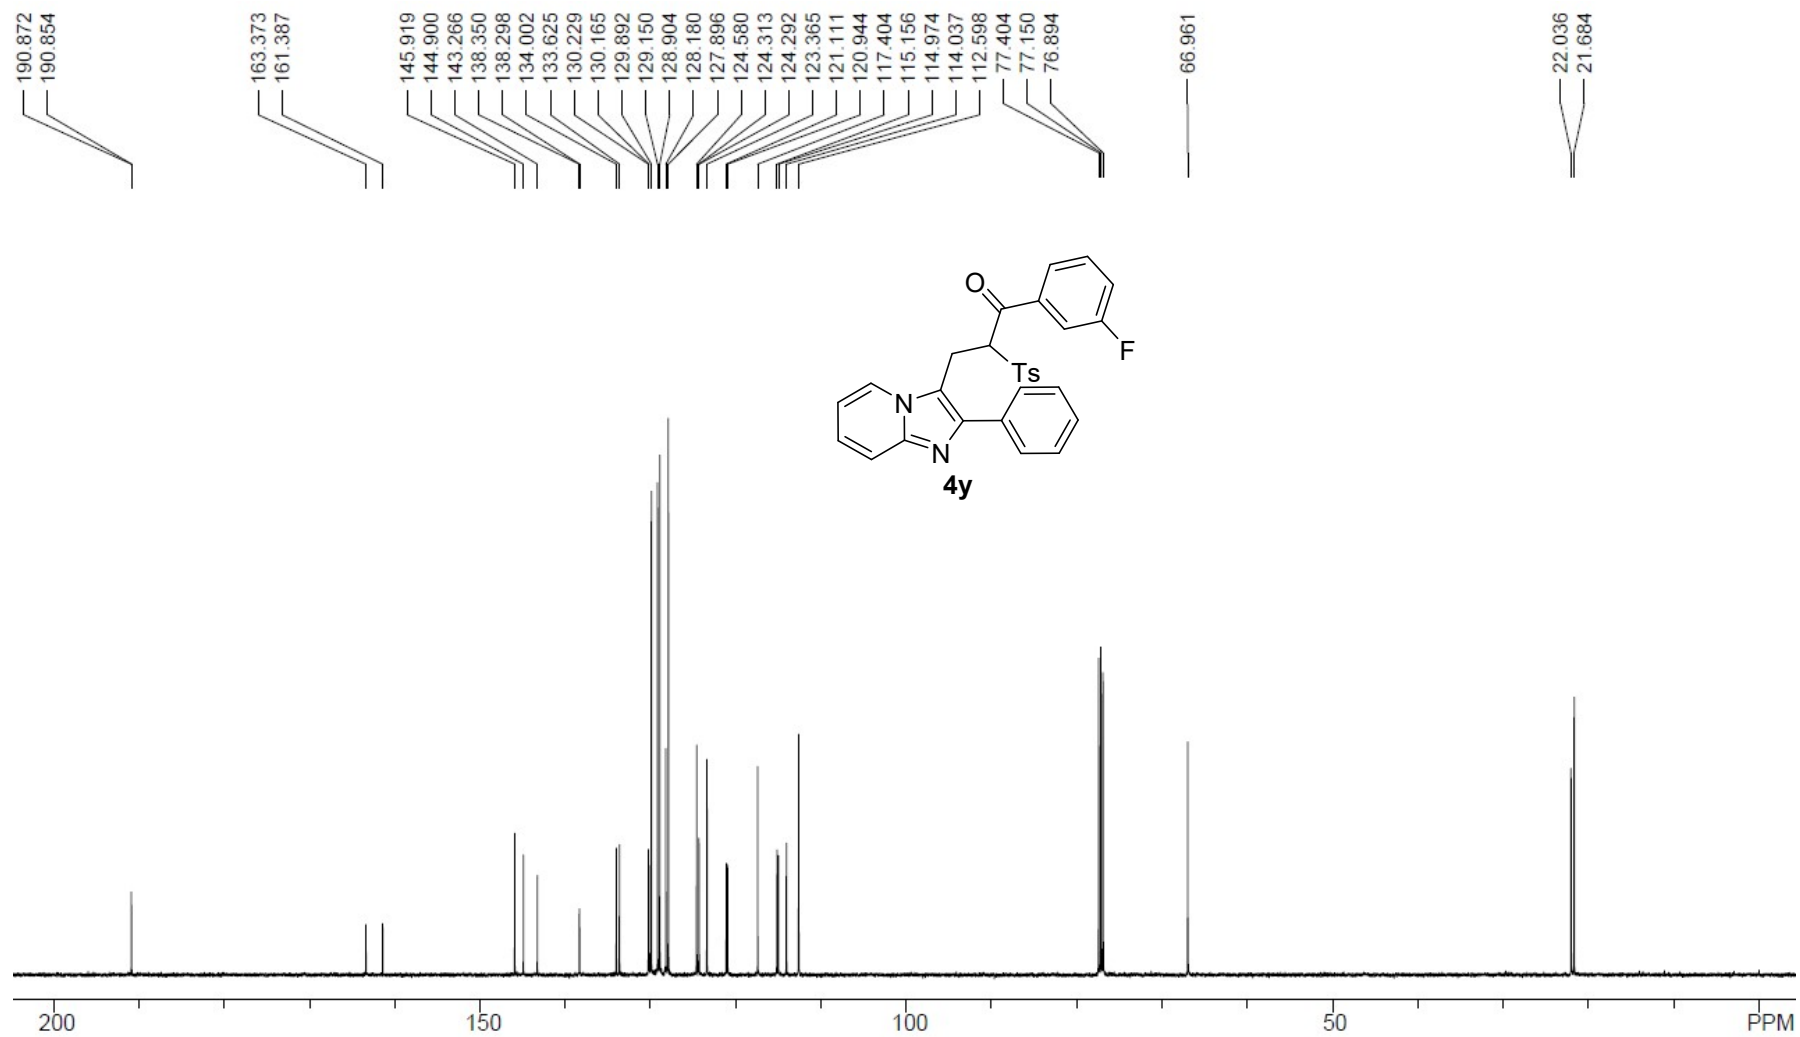

$^{19}\text{F}$  NMR (471 MHz,  $\text{CDCl}_3$ ) of **4y**

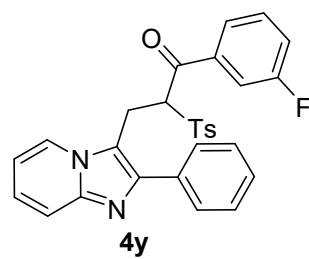

111.325

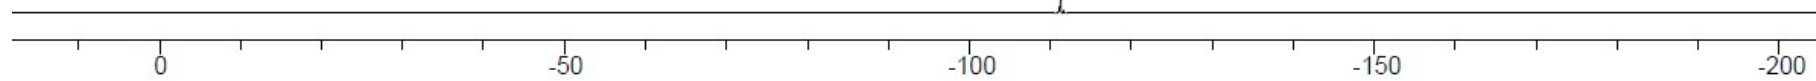

<sup>1</sup>H NMR (500 MHz, CDCl<sub>3</sub>) of **4z**

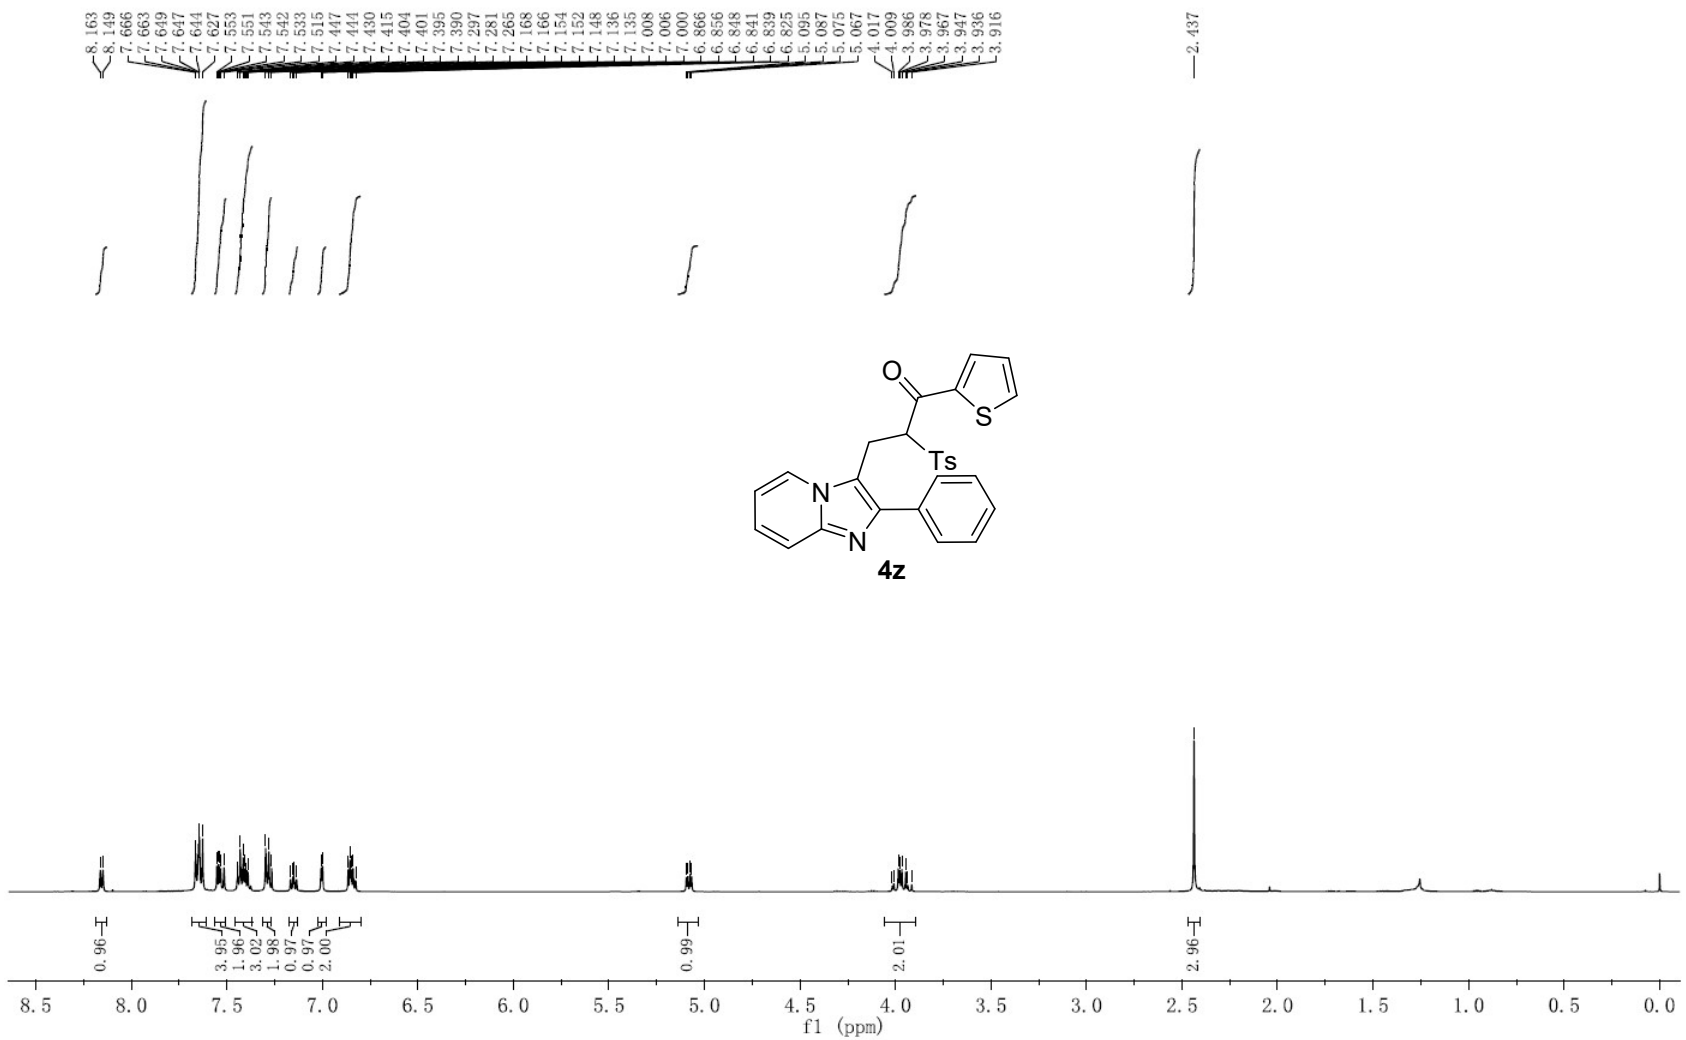

$^{13}\text{C}$  NMR (126 MHz,  $\text{CDCl}_3$ ) of **4z**

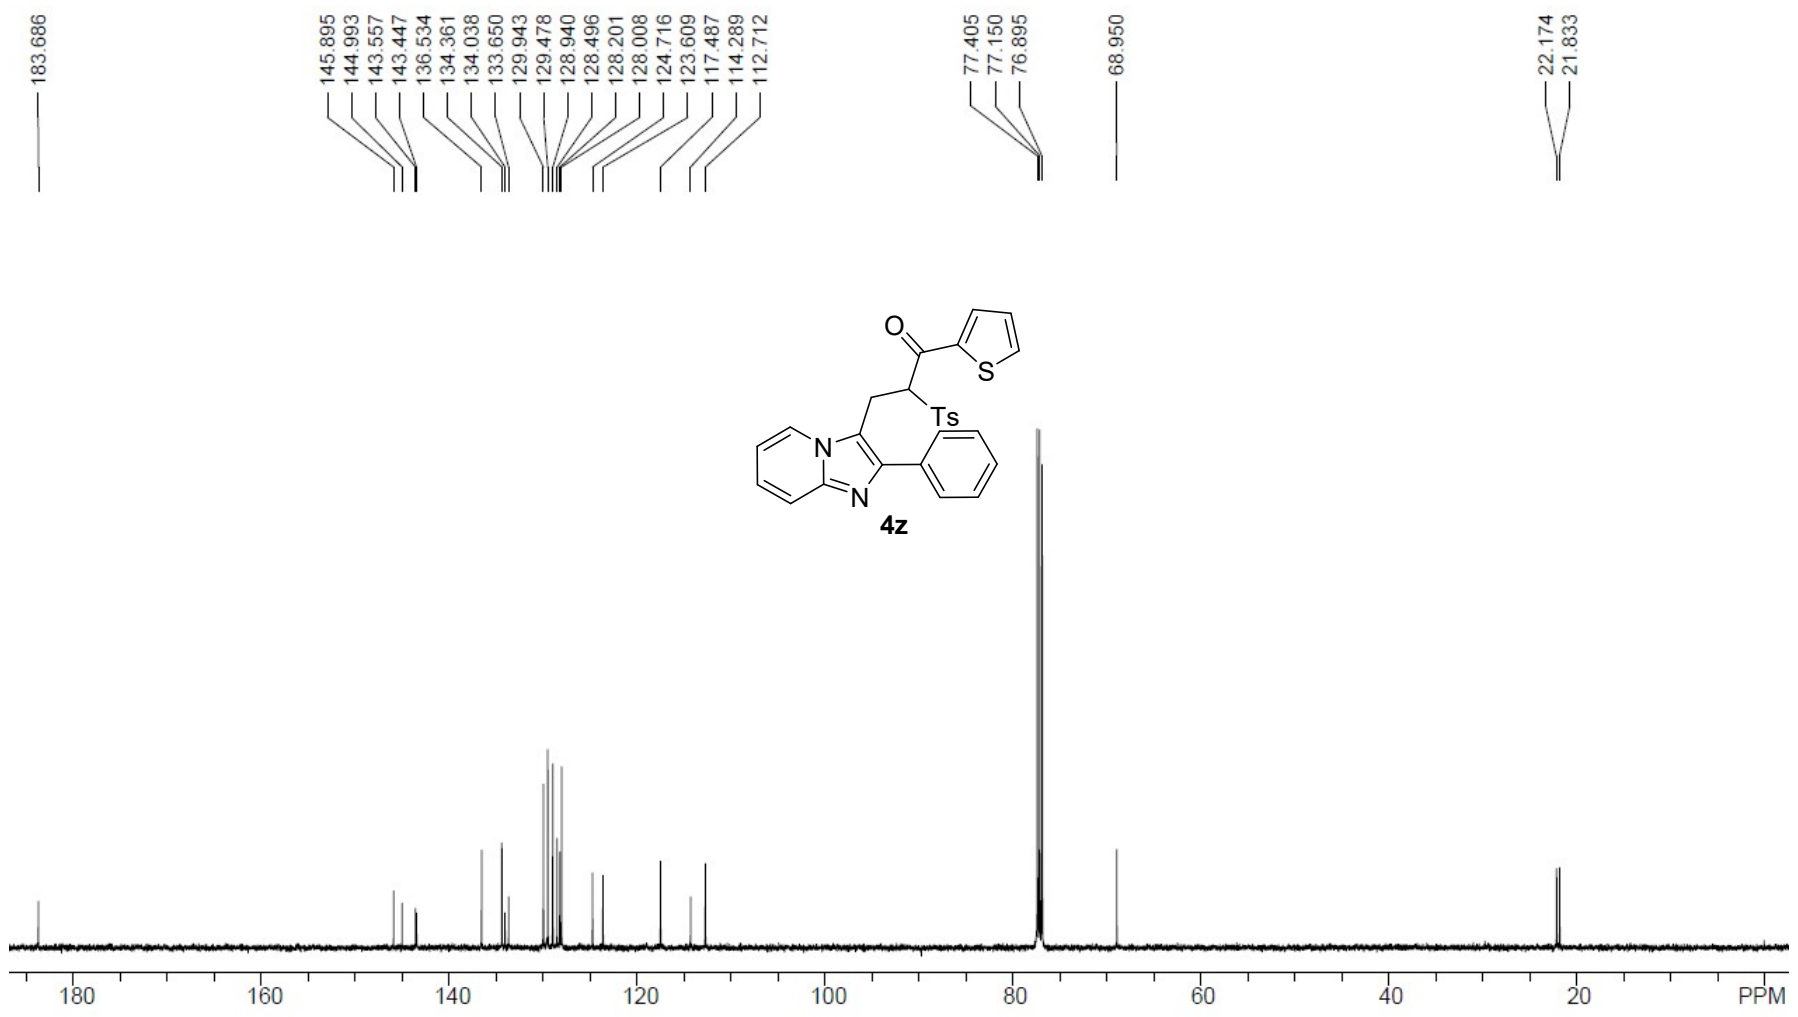

$^1\text{H NMR}$  (500 MHz,  $\text{CDCl}_3$ ) of **4aa**

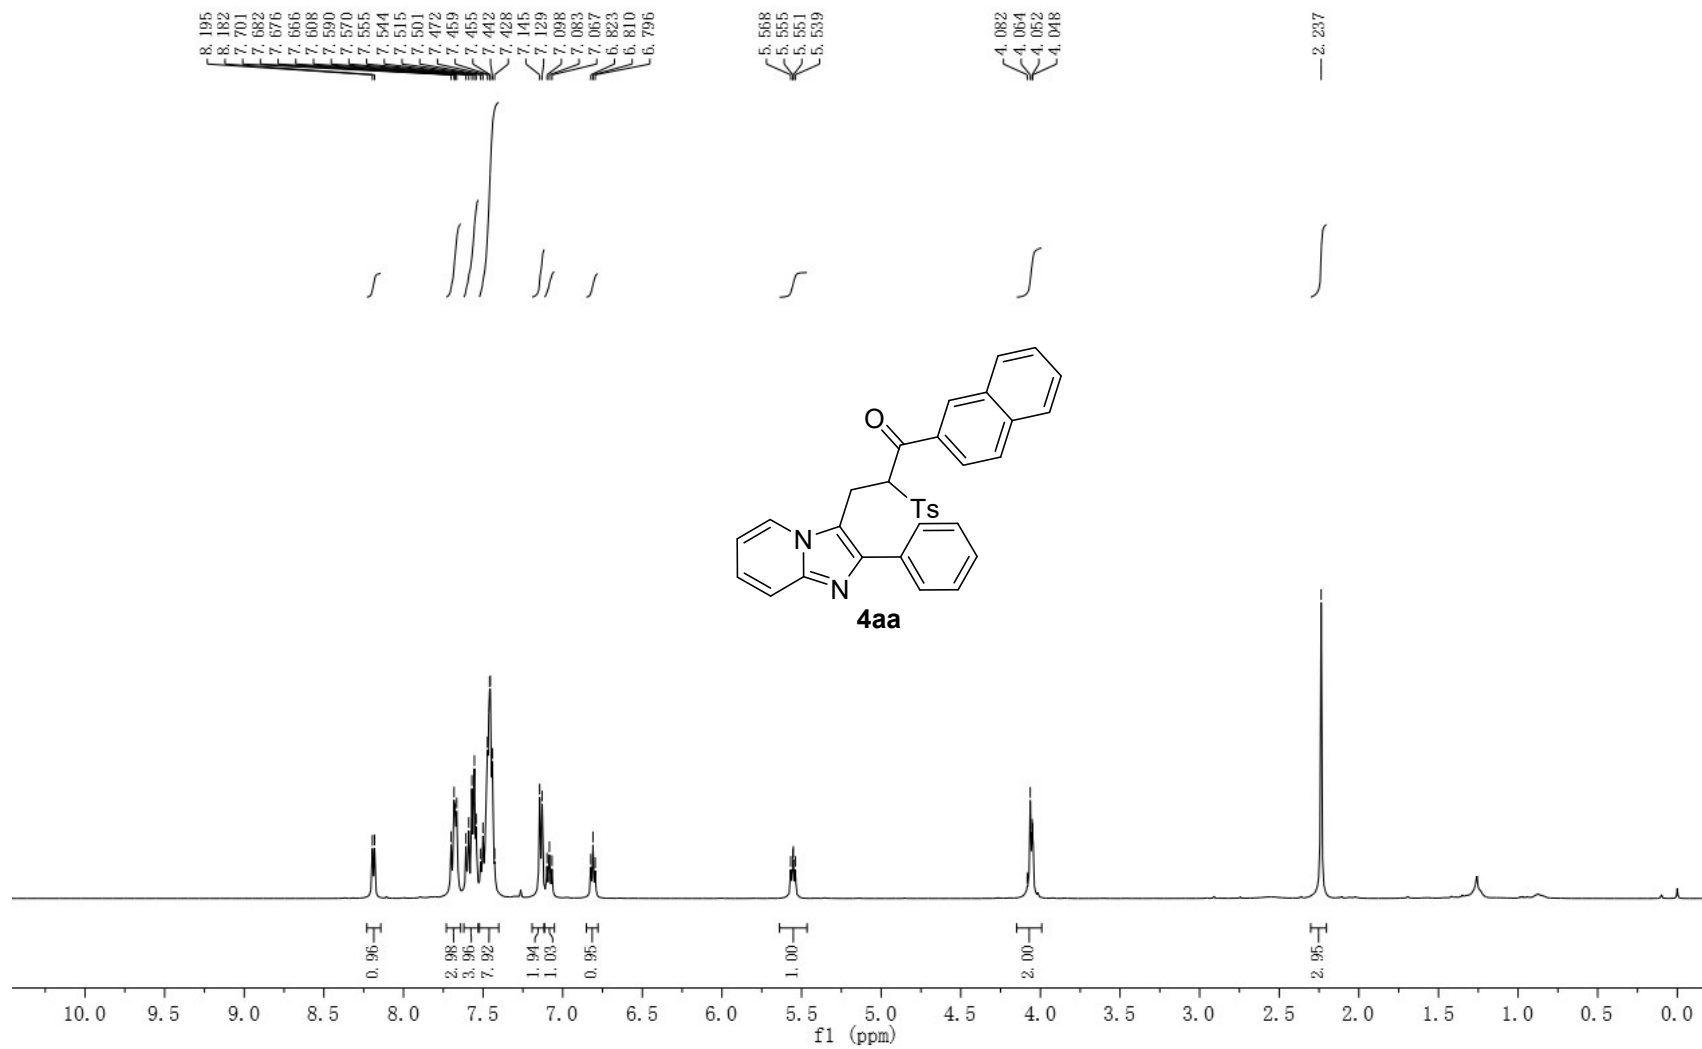

$^{13}\text{C}$  NMR (126 MHz,  $\text{CDCl}_3$ ) of **4aa**

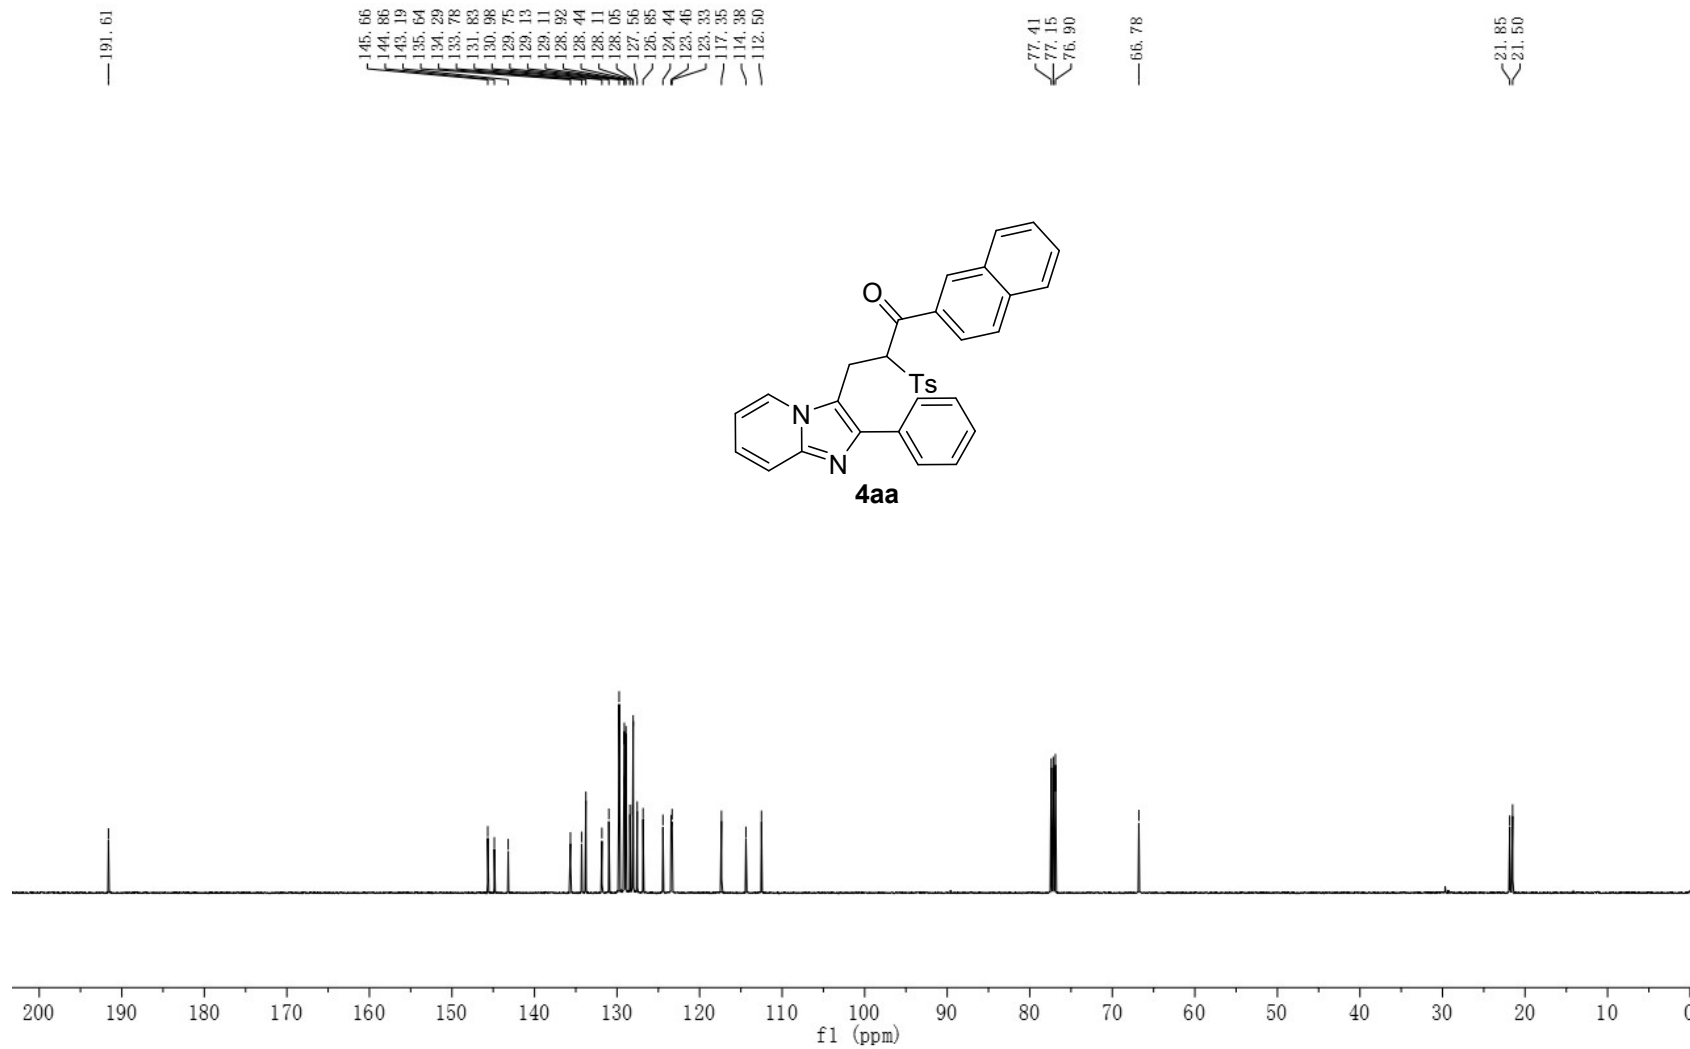

<sup>1</sup>H NMR (500 MHz, CDCl<sub>3</sub>) of **4ab**

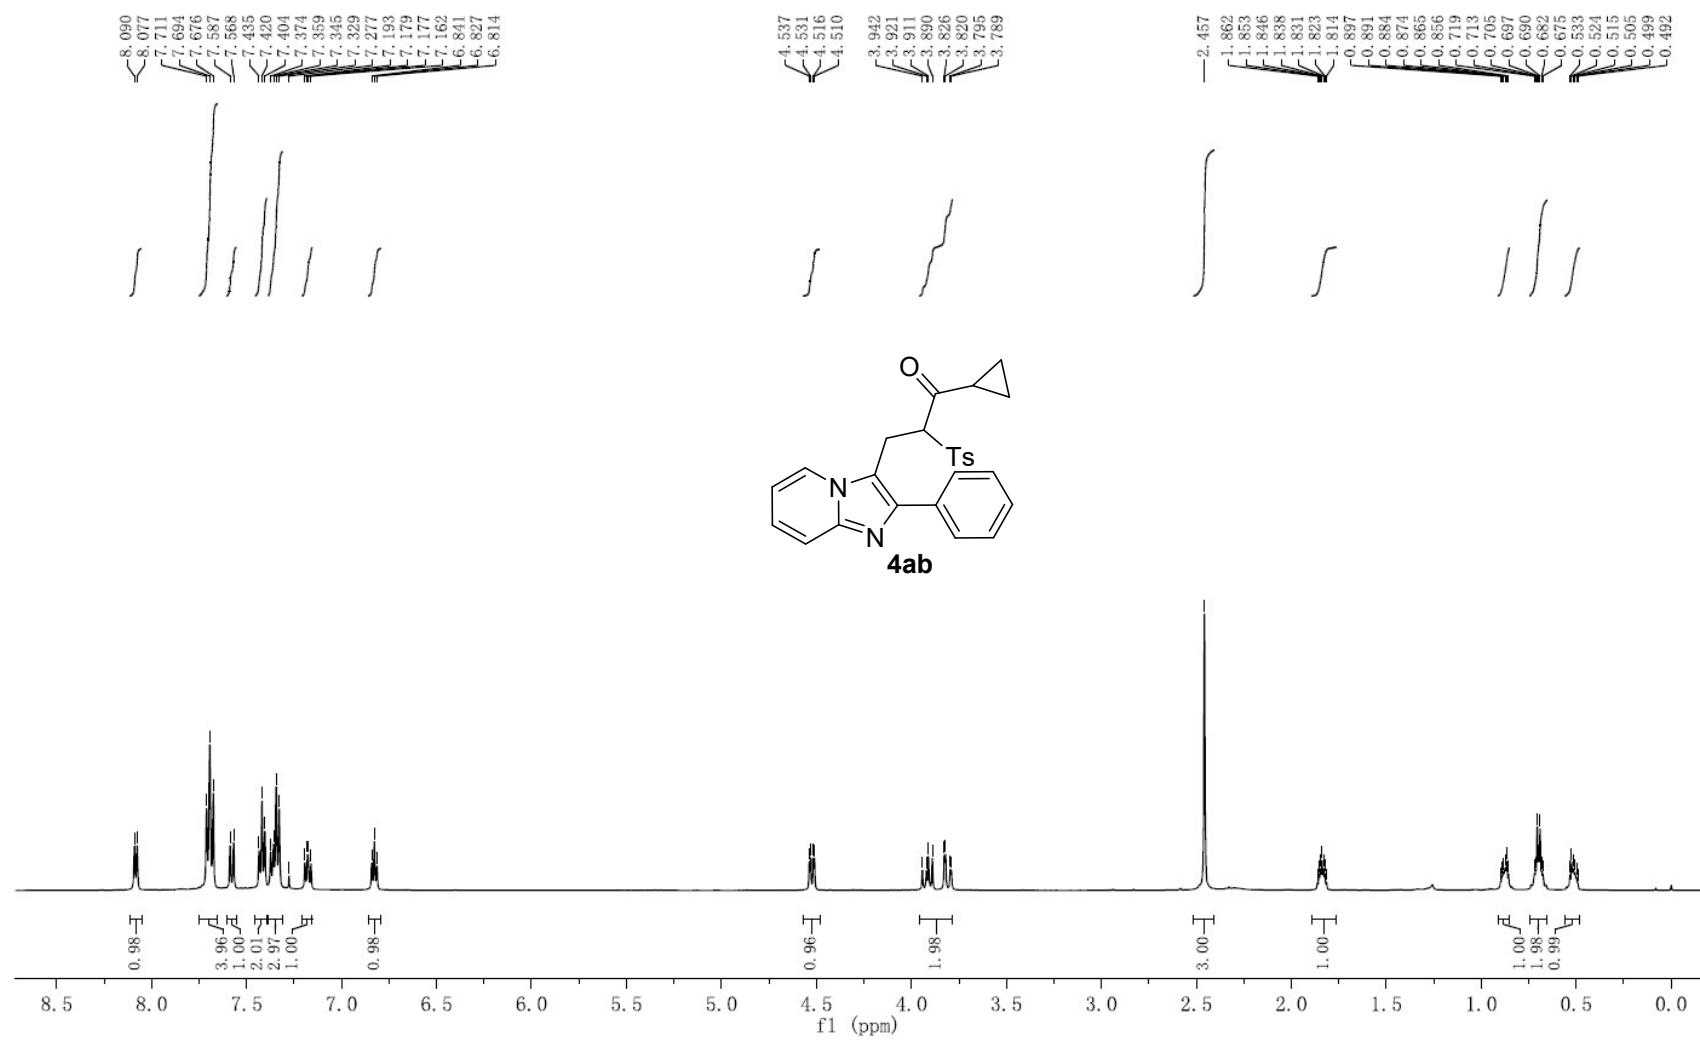



$^{13}\text{C}$  NMR (126 MHz,  $\text{CDCl}_3$ ) of **4ab**

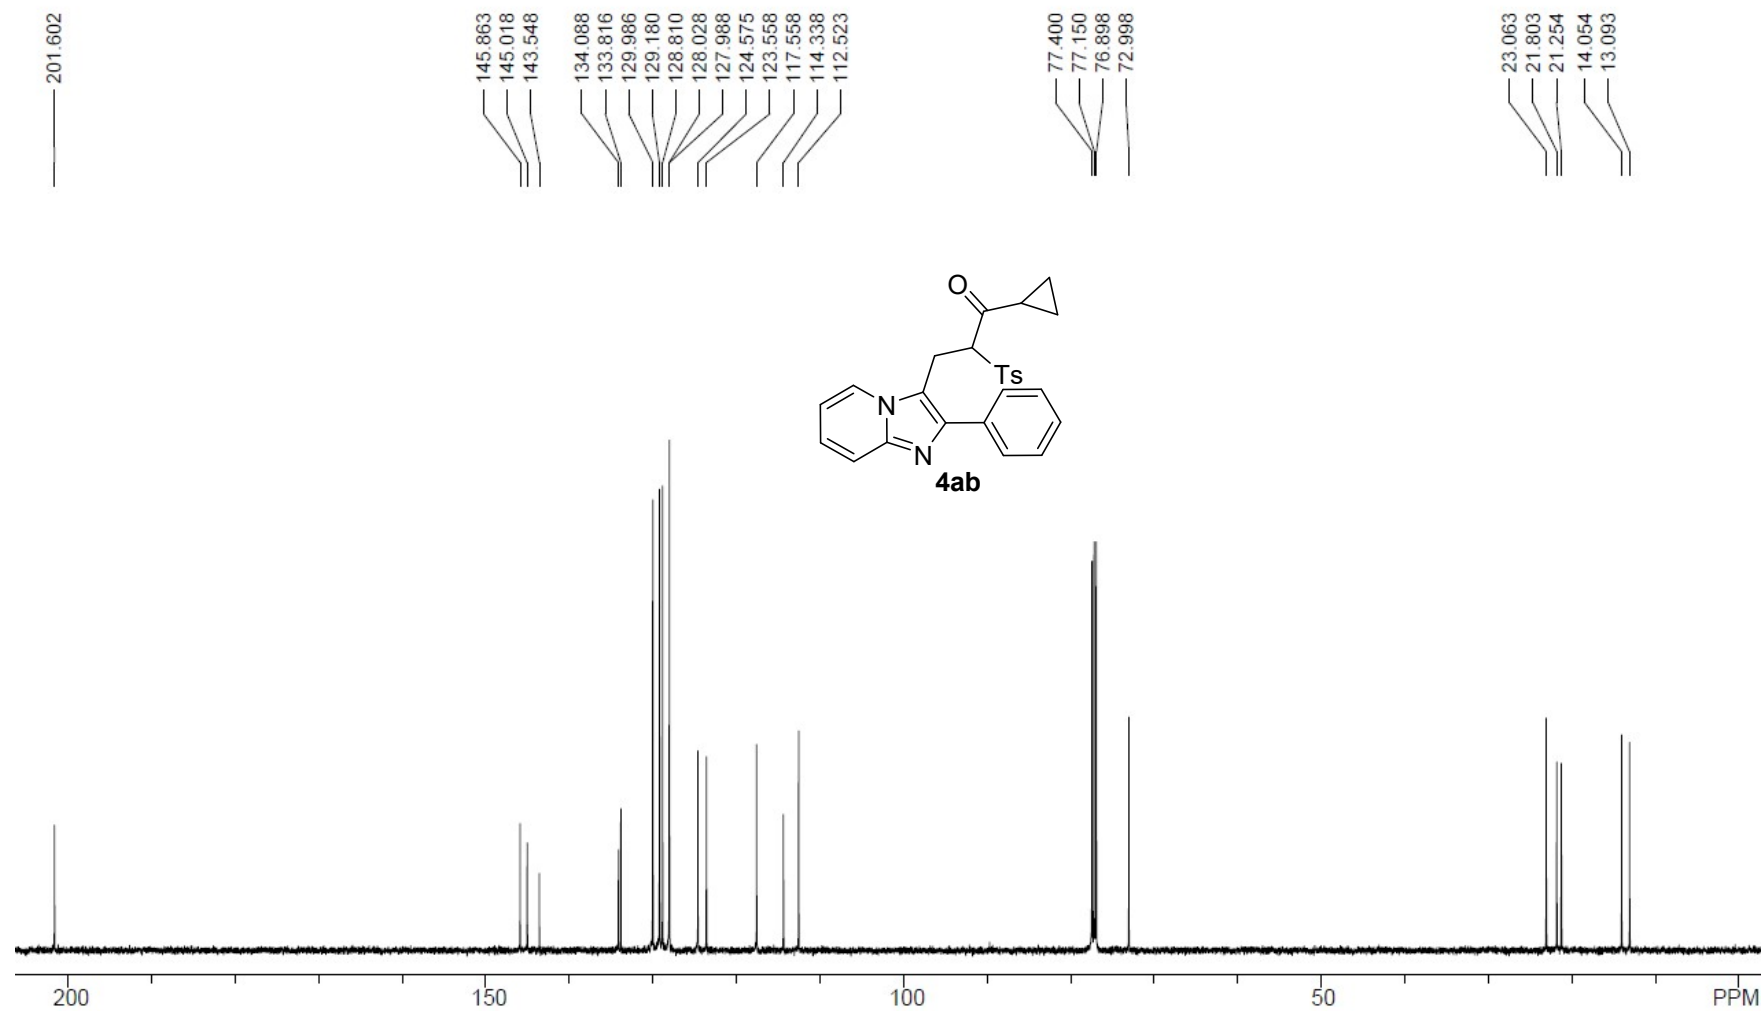

<sup>1</sup>H NMR (500 MHz, DMSO-d<sub>6</sub>) of **6a**

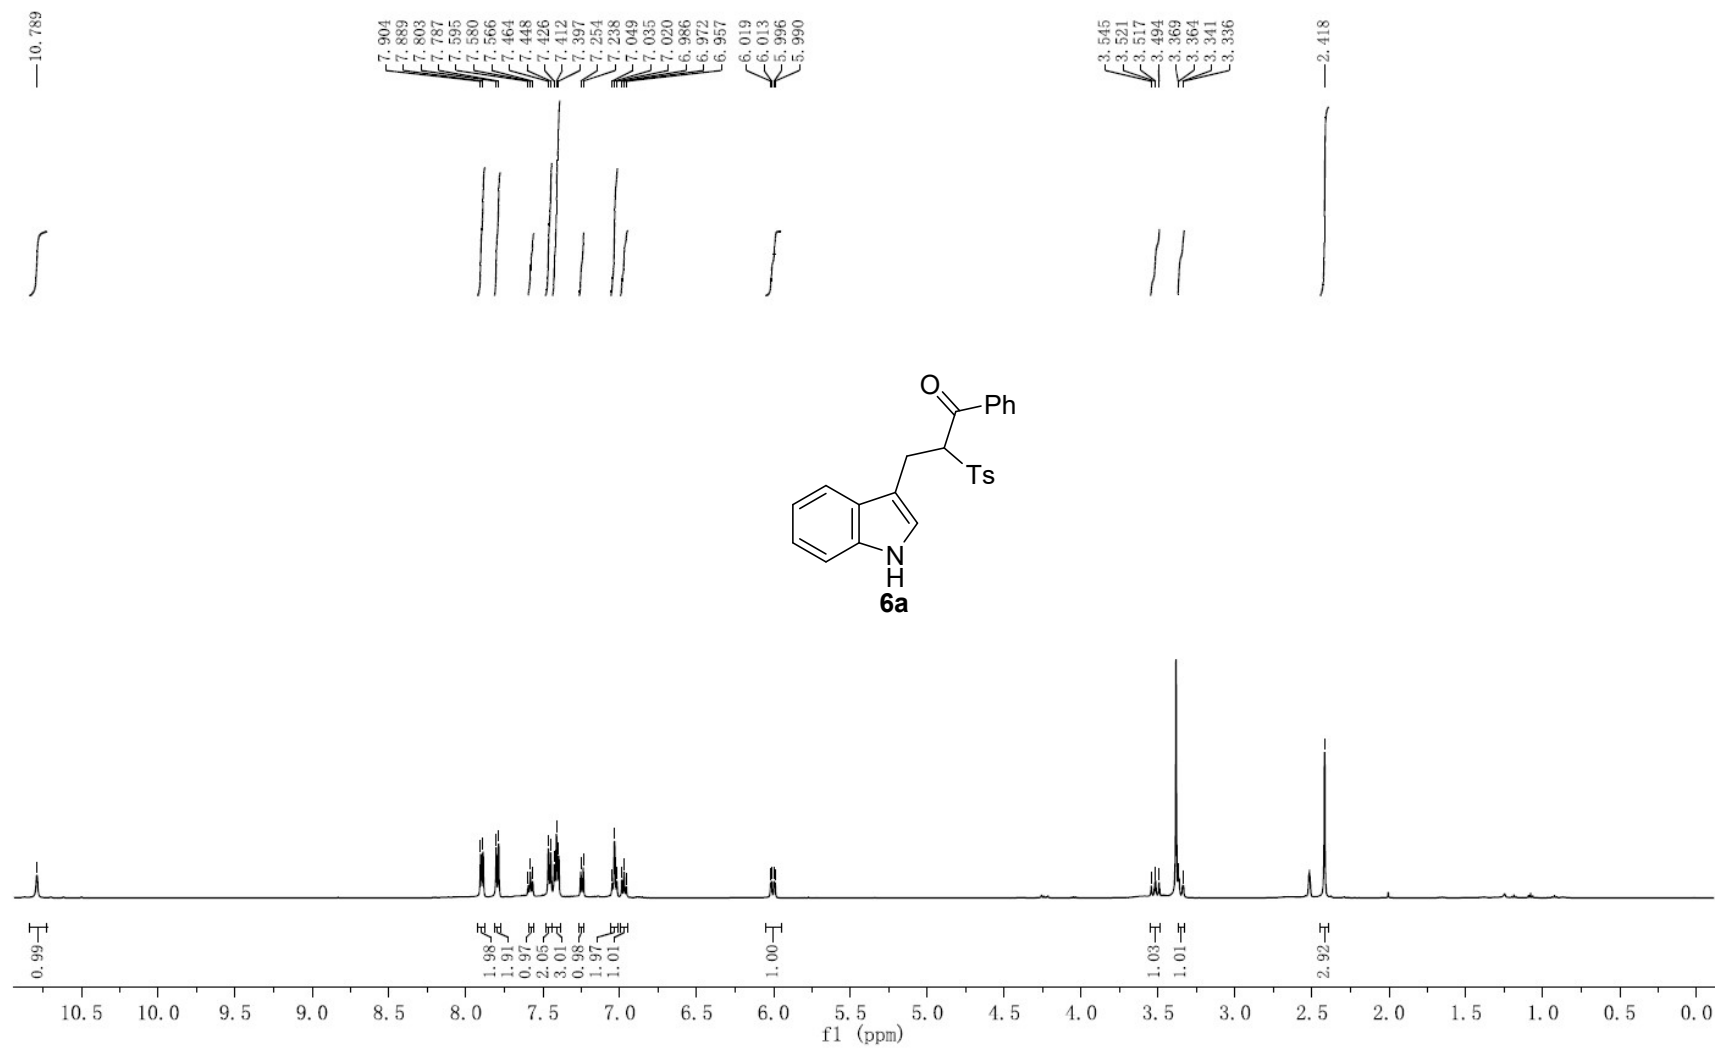

$^{13}\text{C}$  NMR (126 MHz, DMSO- $d_6$ ) of **6a**

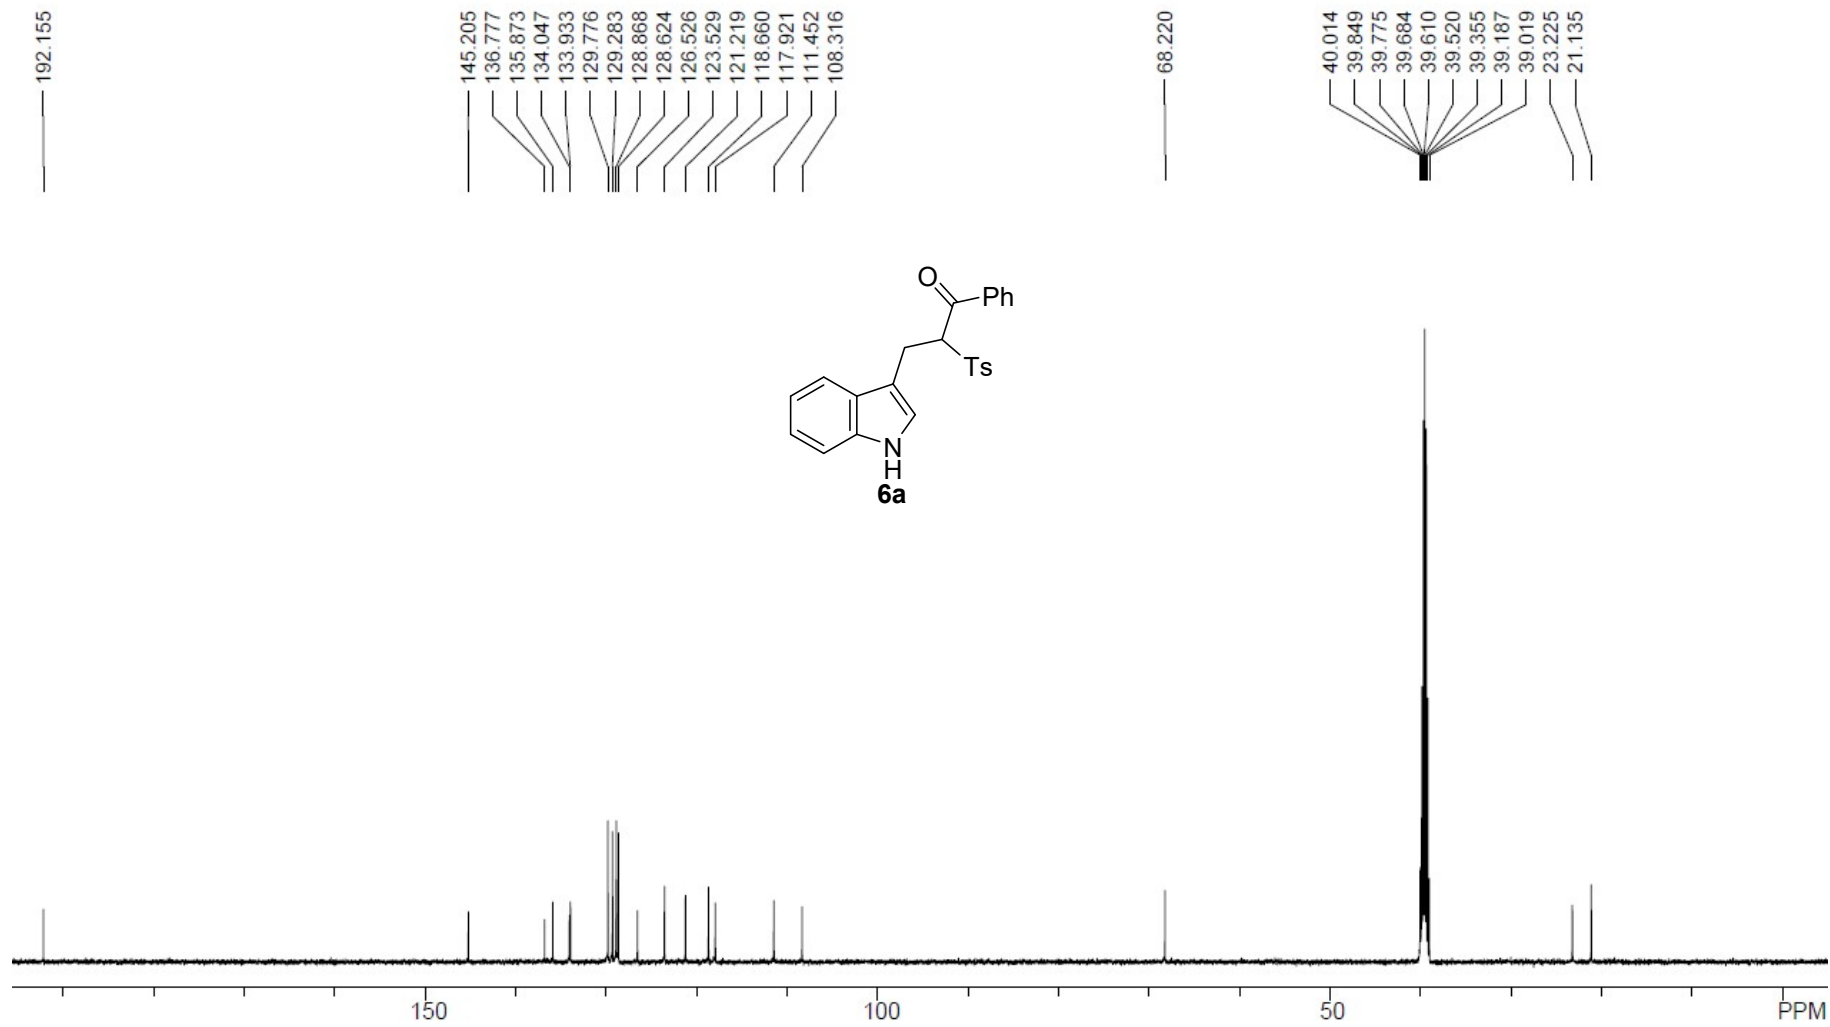

<sup>1</sup>H NMR (500 MHz, DMSO-d<sub>6</sub>) of **6b**

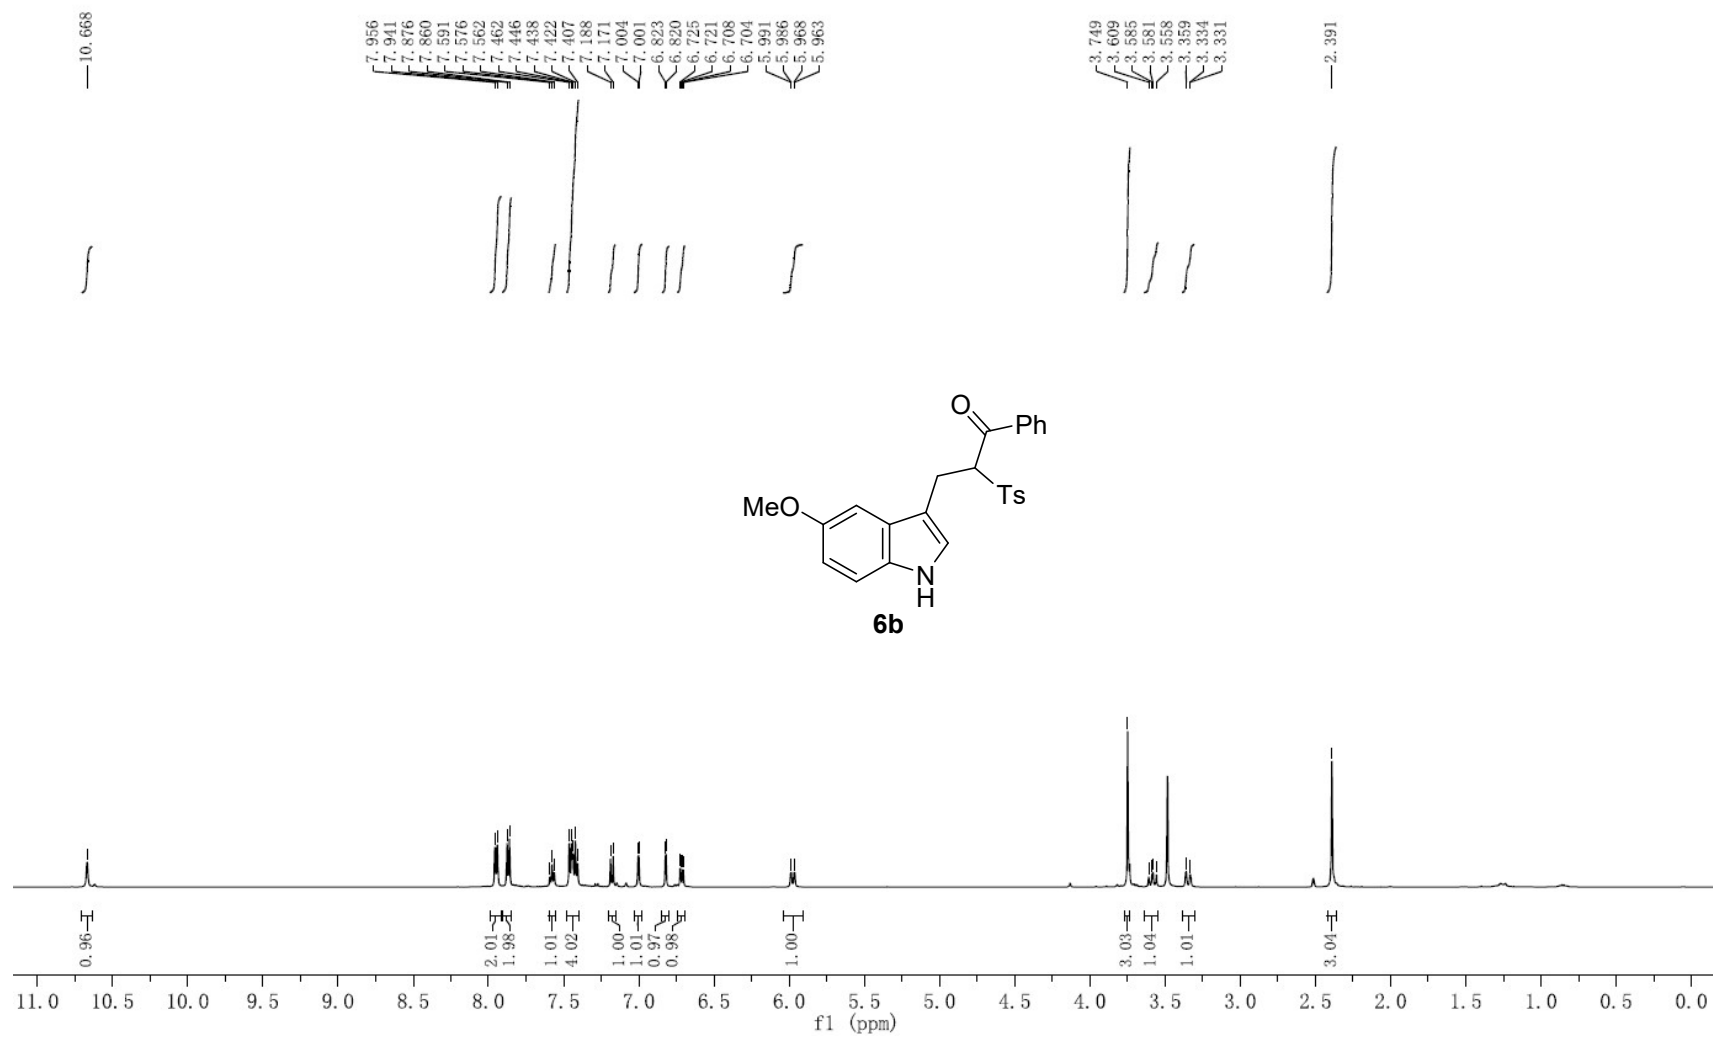

$^{13}\text{C}$  NMR (126 MHz,  $\text{DMSO-d}_6$ ) of **6b**

—192.647

—153.679

—145.679

—137.307

—134.743

—134.425

—131.522

—130.299

—129.712

—129.385

—129.116

—127.278

—124.589

—112.687

—111.983

—108.572

—99.983

—68.687

—55.742

—40.460

—40.293

—40.126

—39.959

—39.792

—39.625

—39.458

—23.876

—21.560

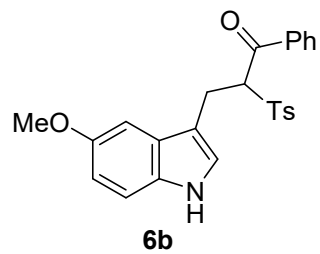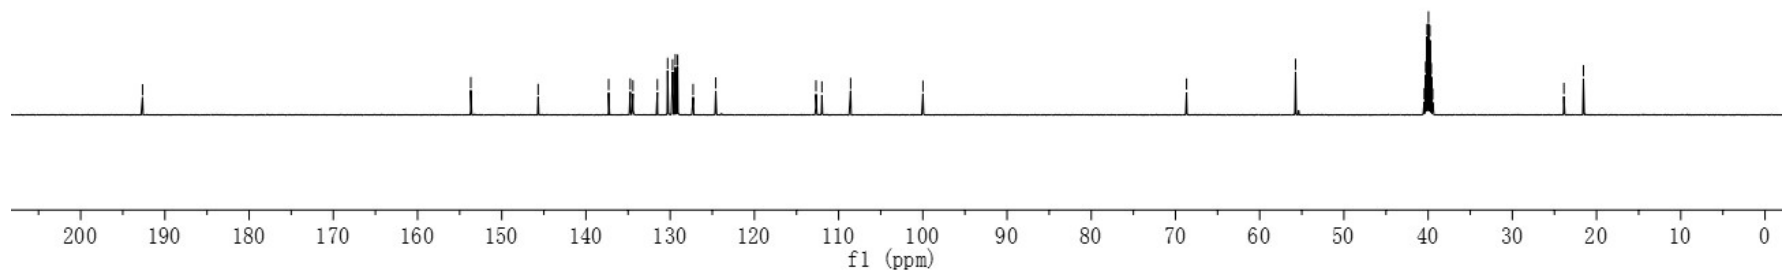

<sup>1</sup>H NMR (500 MHz, DMSO-d<sub>6</sub>) of **6c**

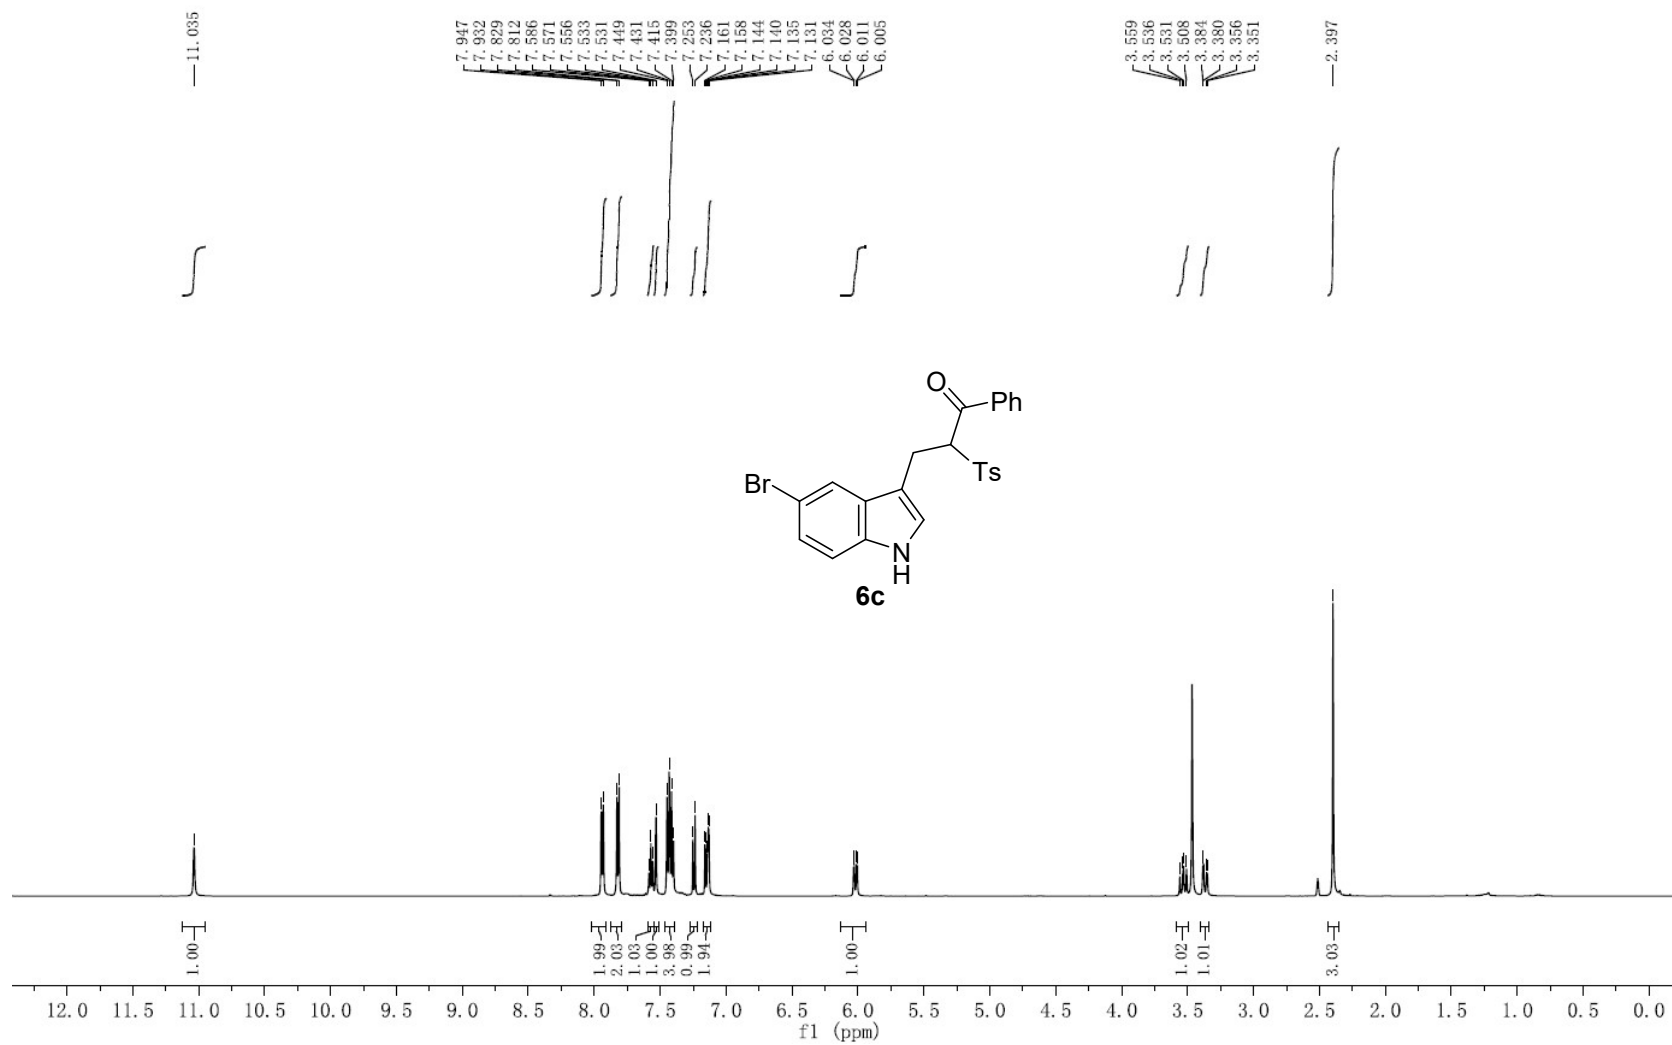

$^{13}\text{C}$  NMR (126 MHz,  $\text{DMSO-d}_6$ ) of **6c**

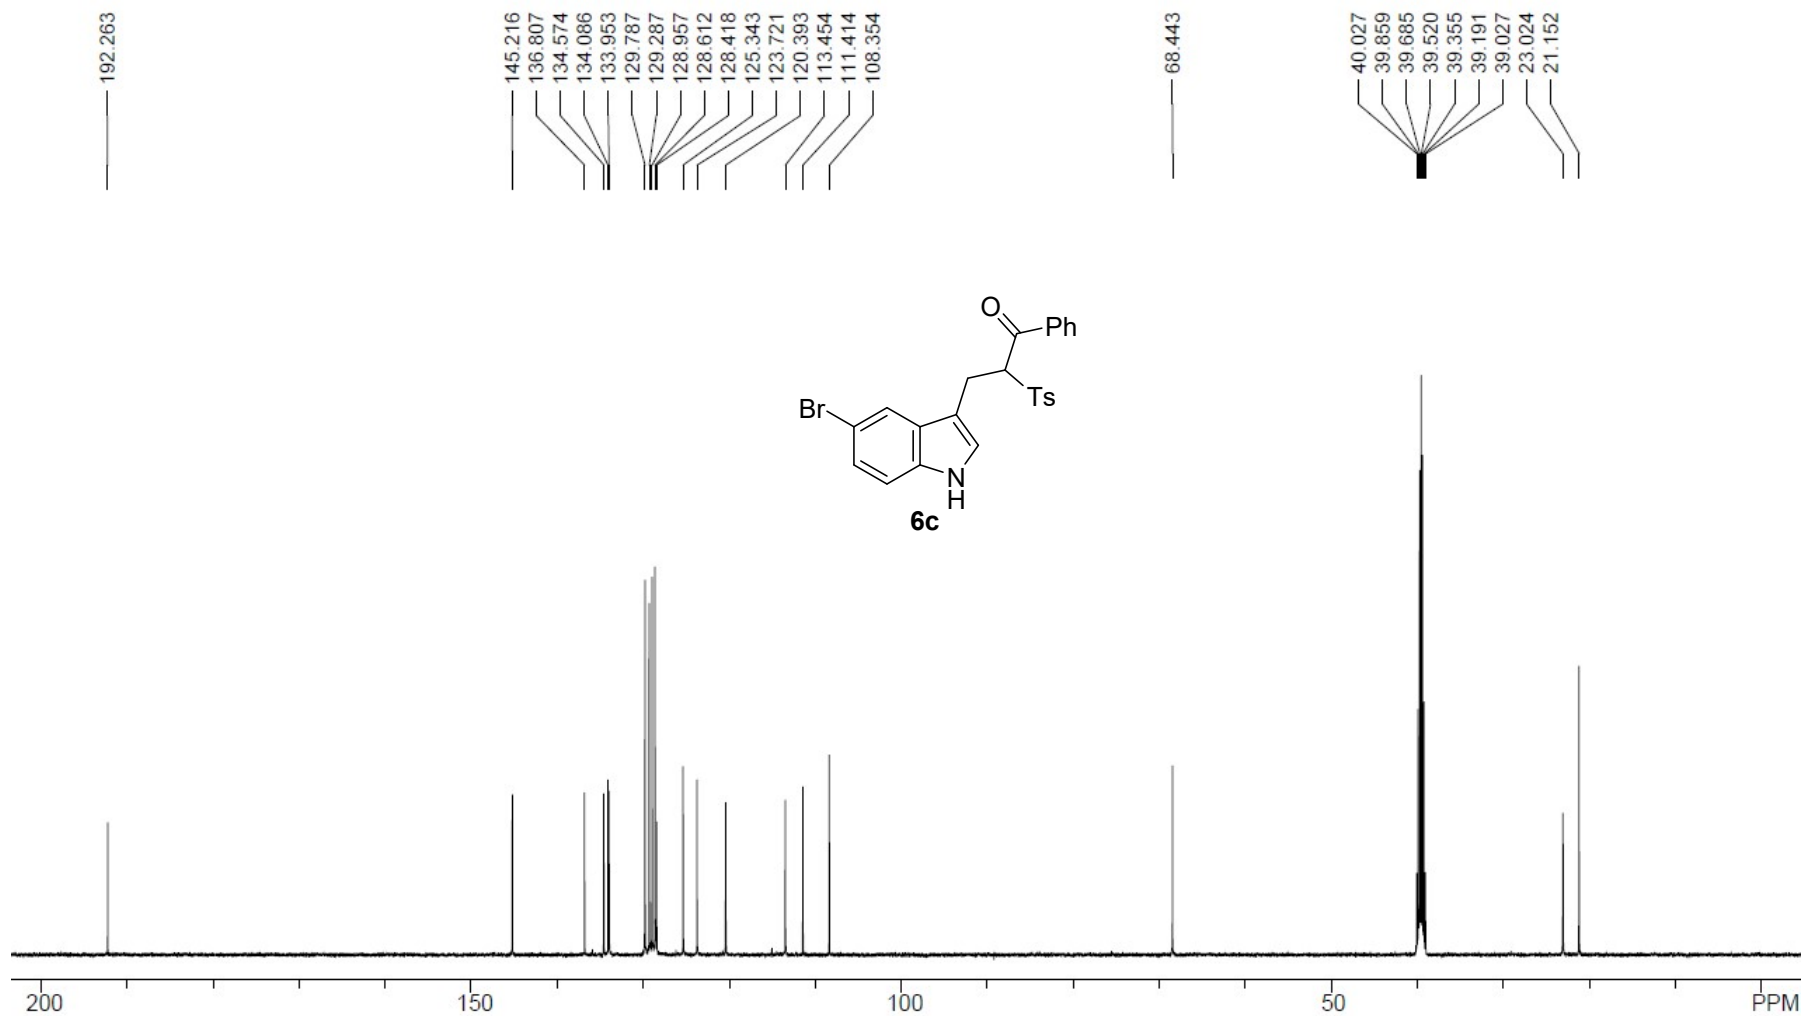

<sup>1</sup>H NMR (500 MHz, DMSO-d<sub>6</sub>) of **6d**

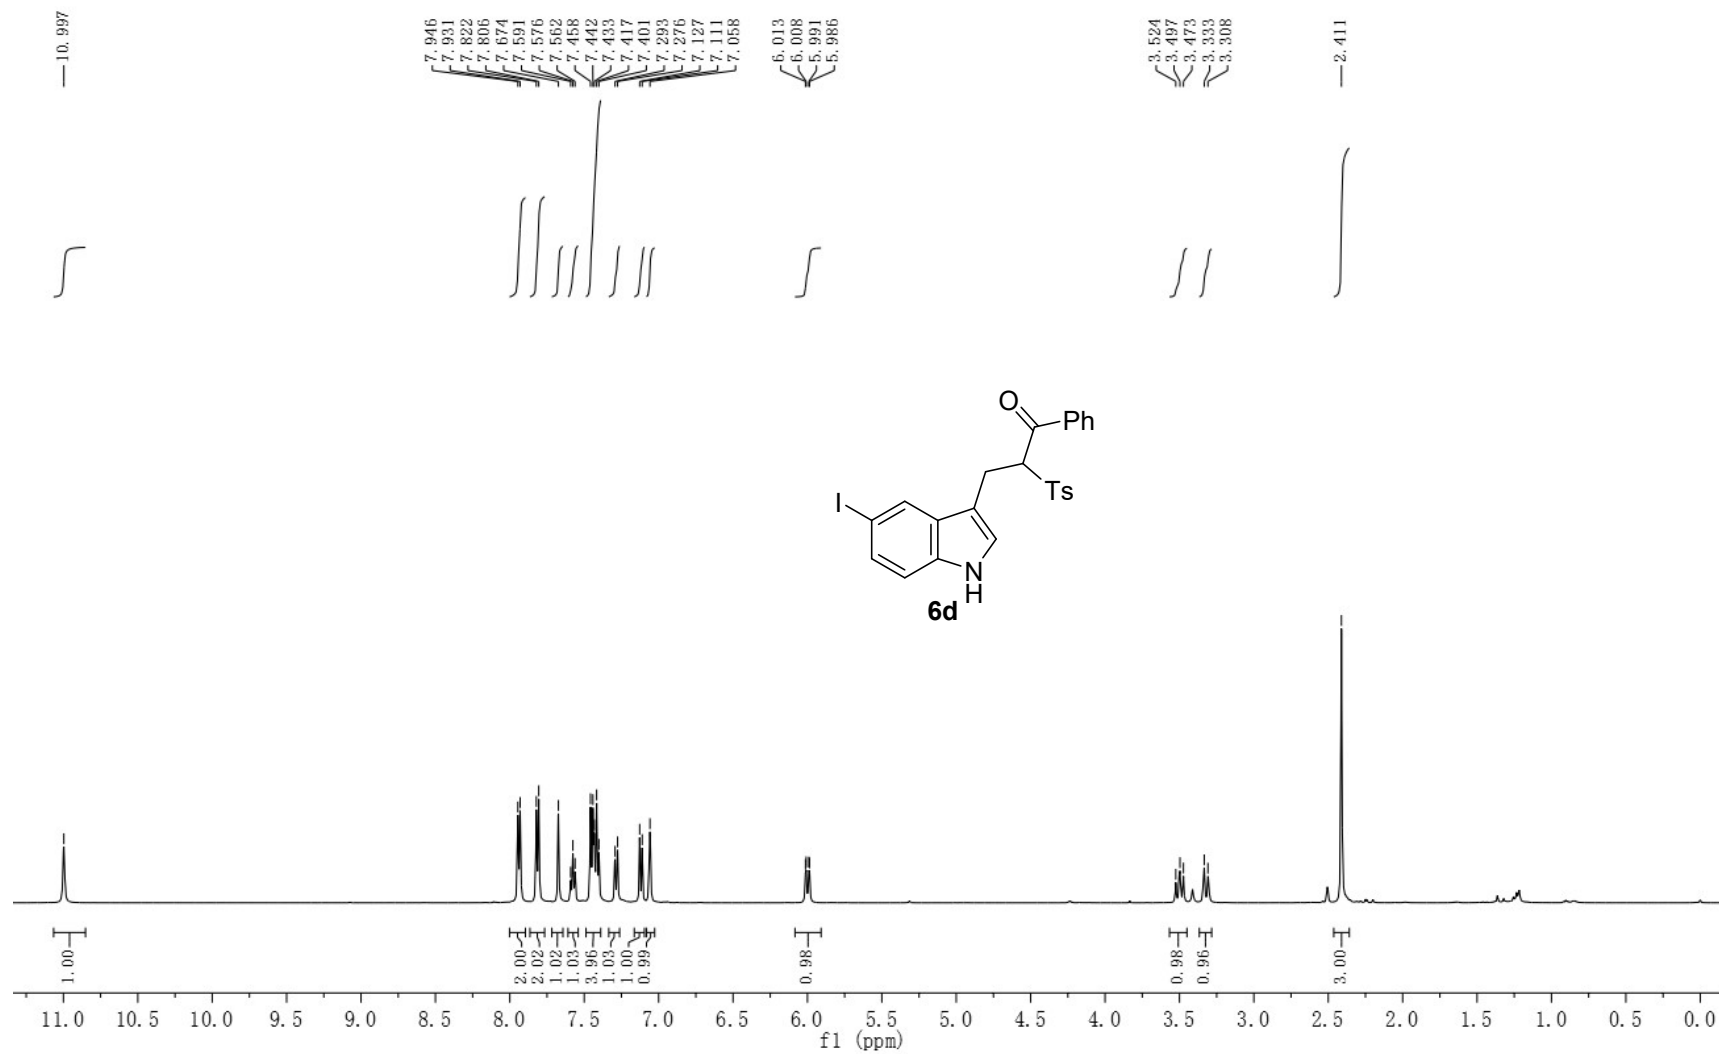



$^{13}\text{C}$  NMR (126 MHz,  $\text{DMSO-d}_6$ ) of **6d**

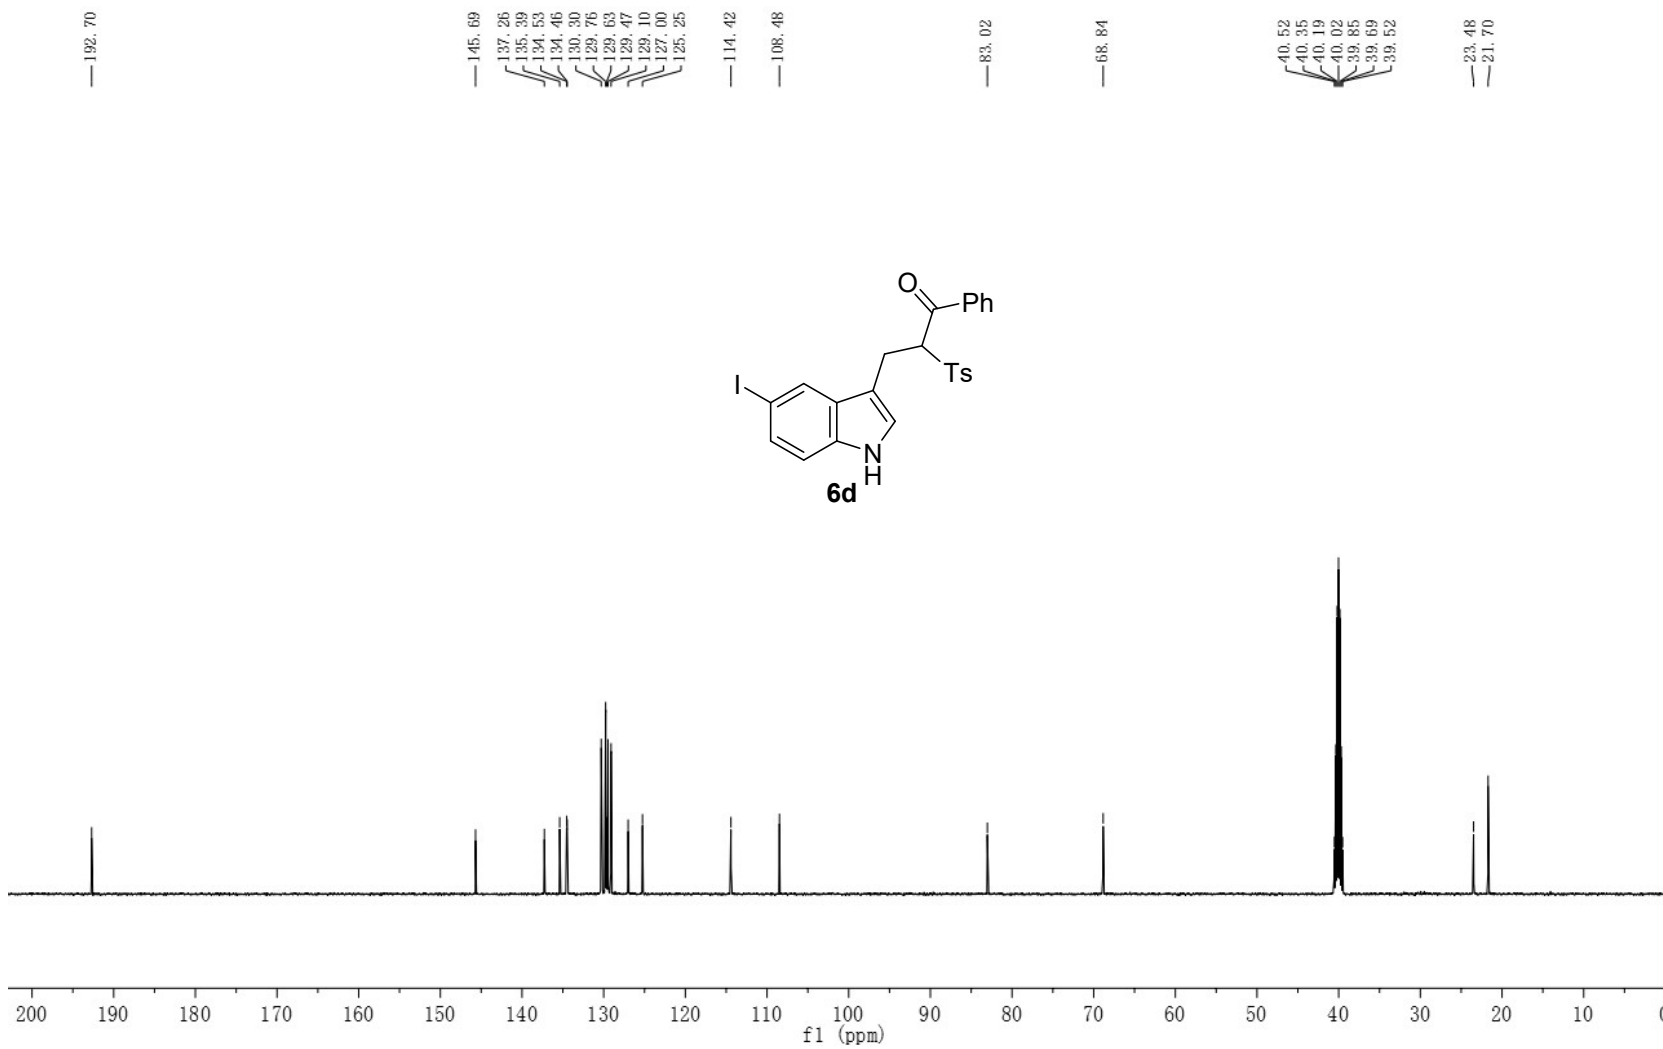

<sup>1</sup>H NMR (500 MHz, DMSO-d<sub>6</sub>) of **6e**

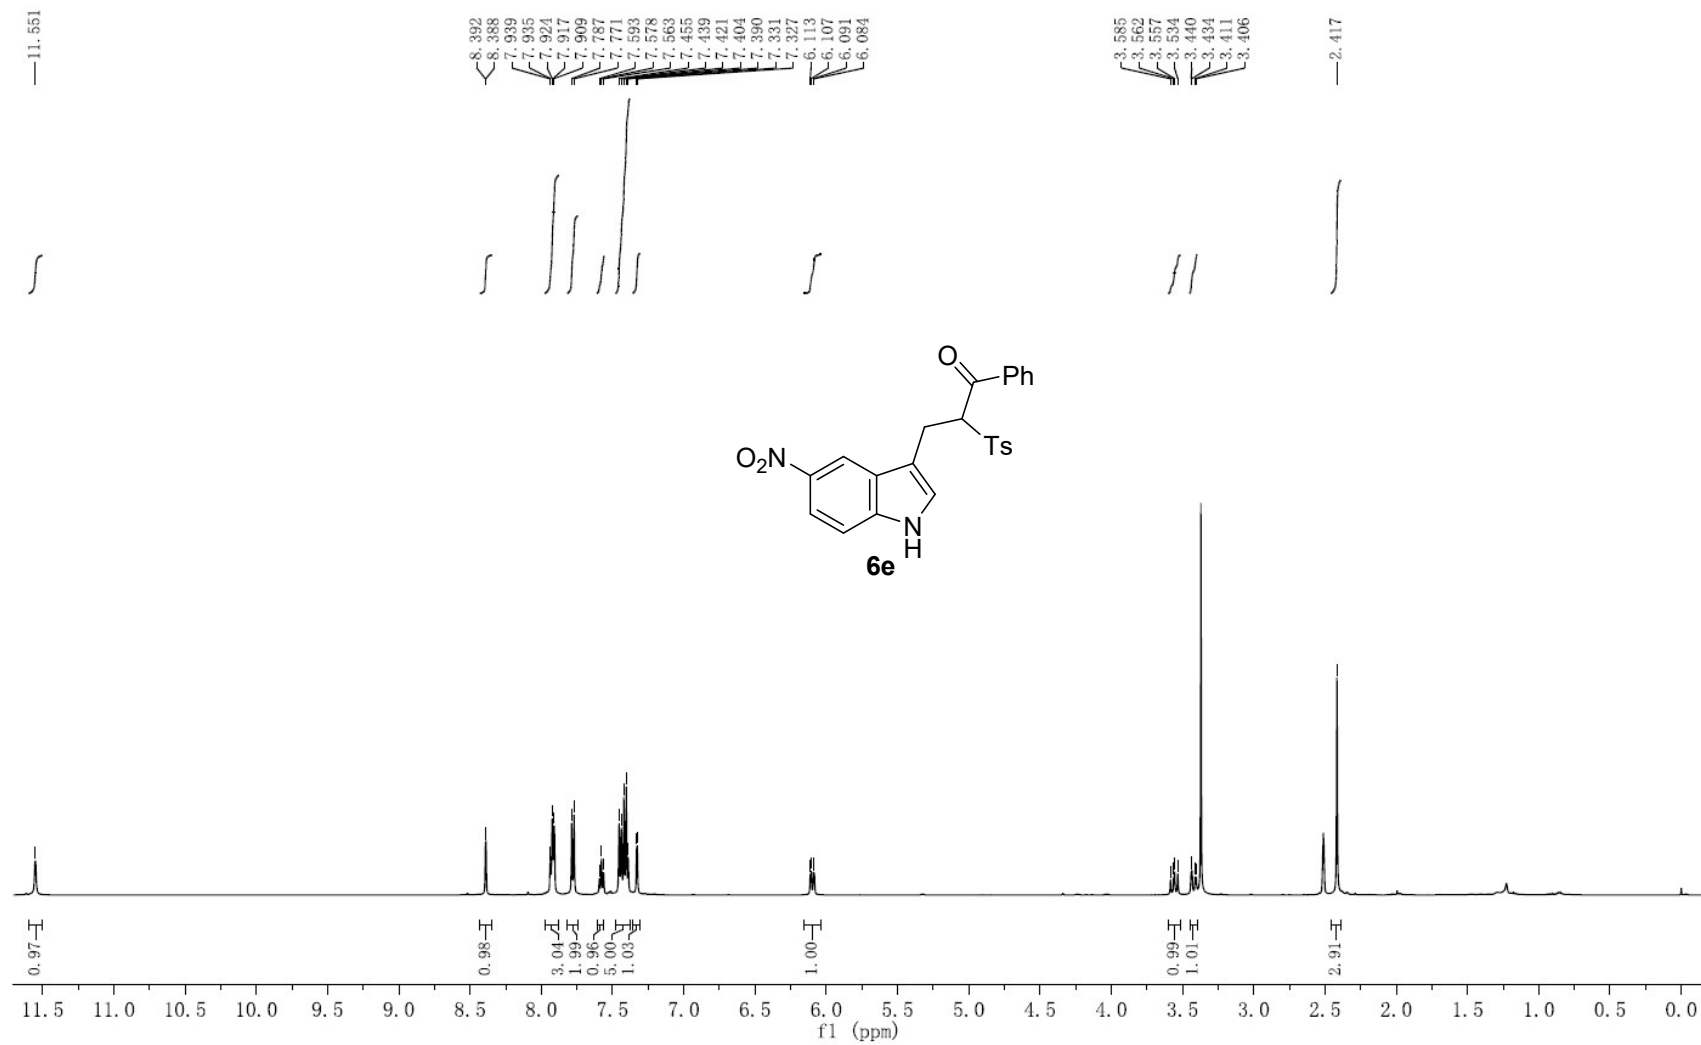

$^{13}\text{C}$  NMR (126 MHz, DMSO- $d_6$ ) of **6e**

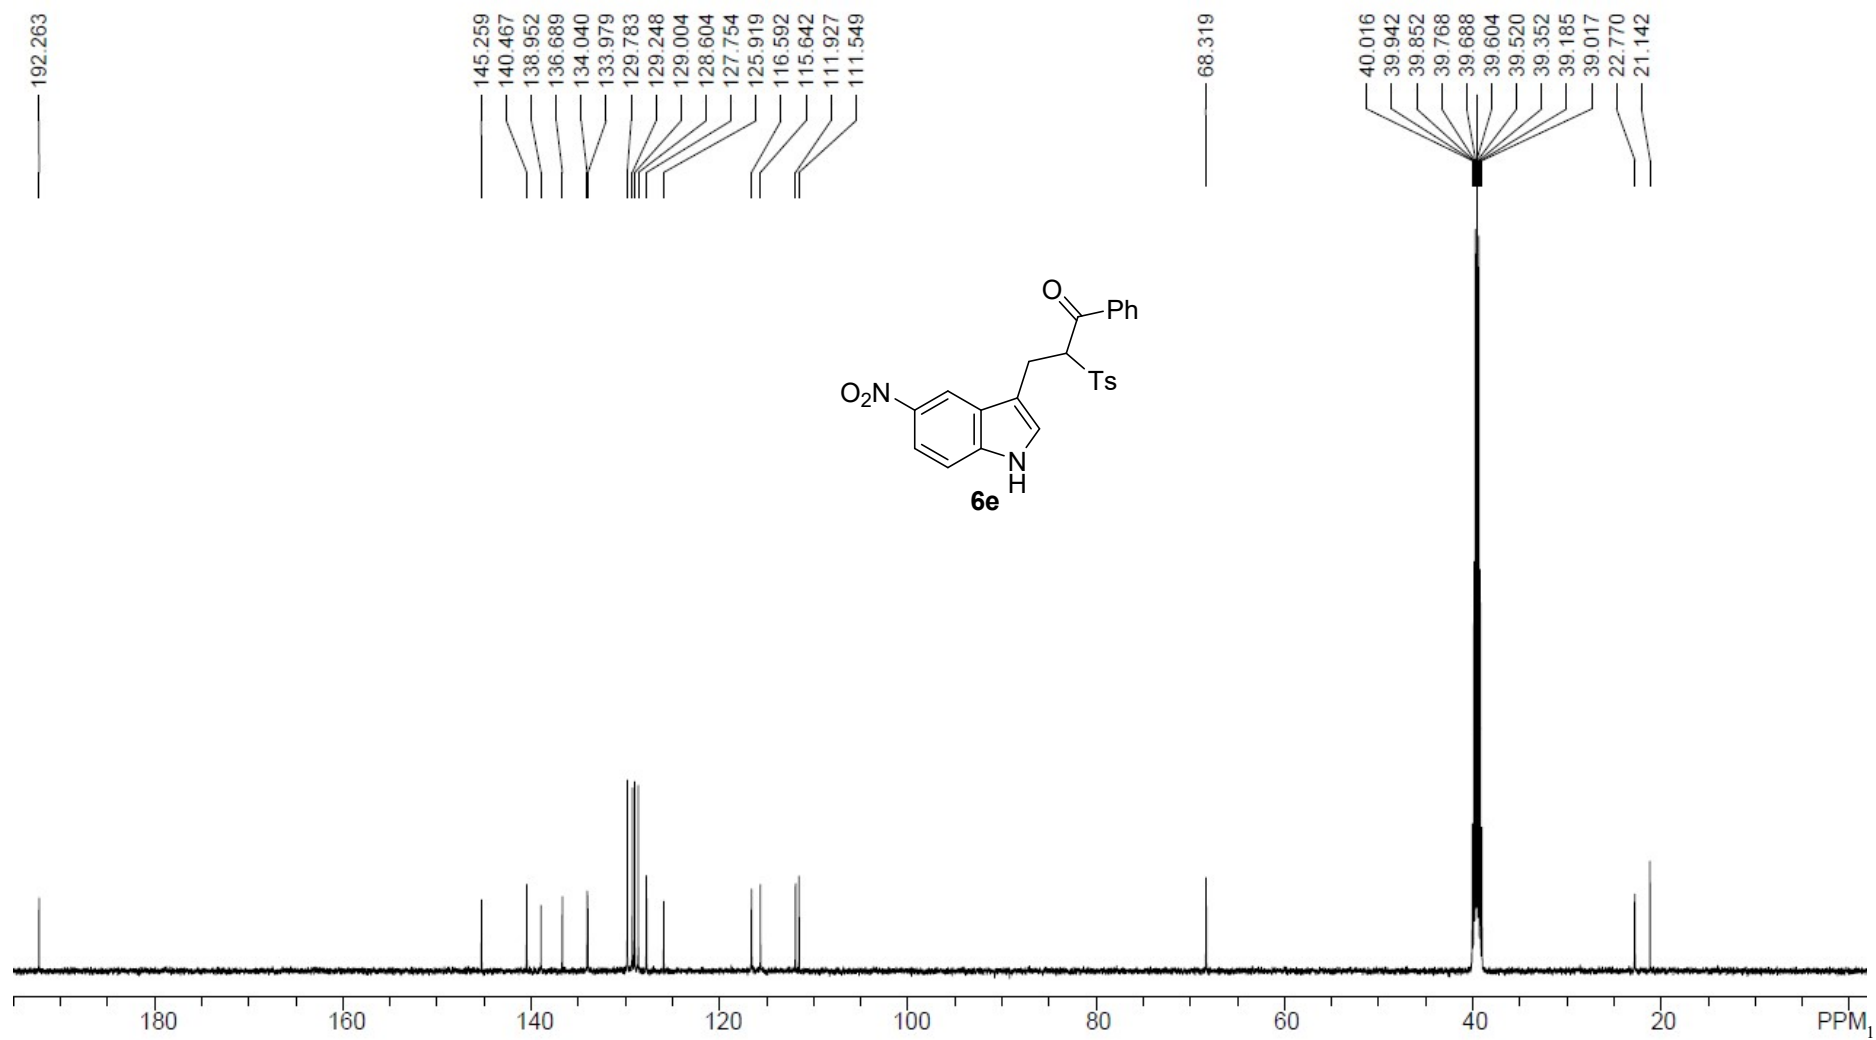

H NMR (500 MHz, DMSO-d<sub>6</sub>) of **6f**

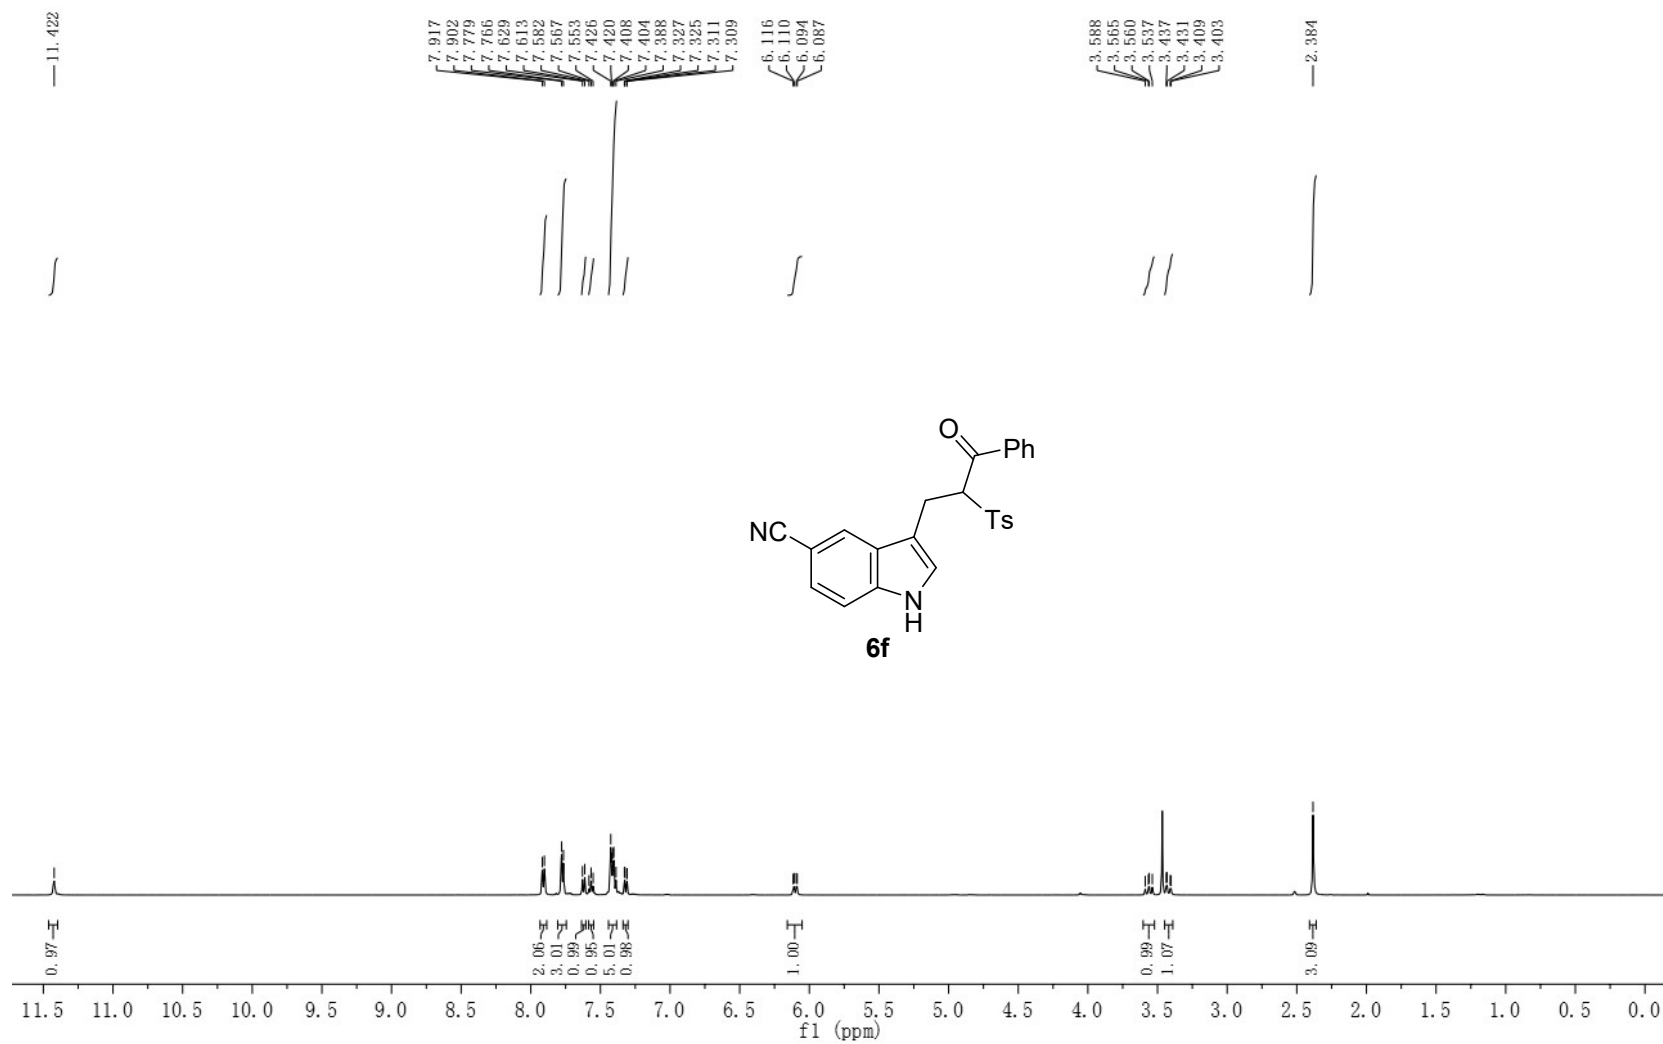

$^{13}\text{C}$  NMR (126 MHz,  $\text{DMSO-d}_6$ ) of **6f**

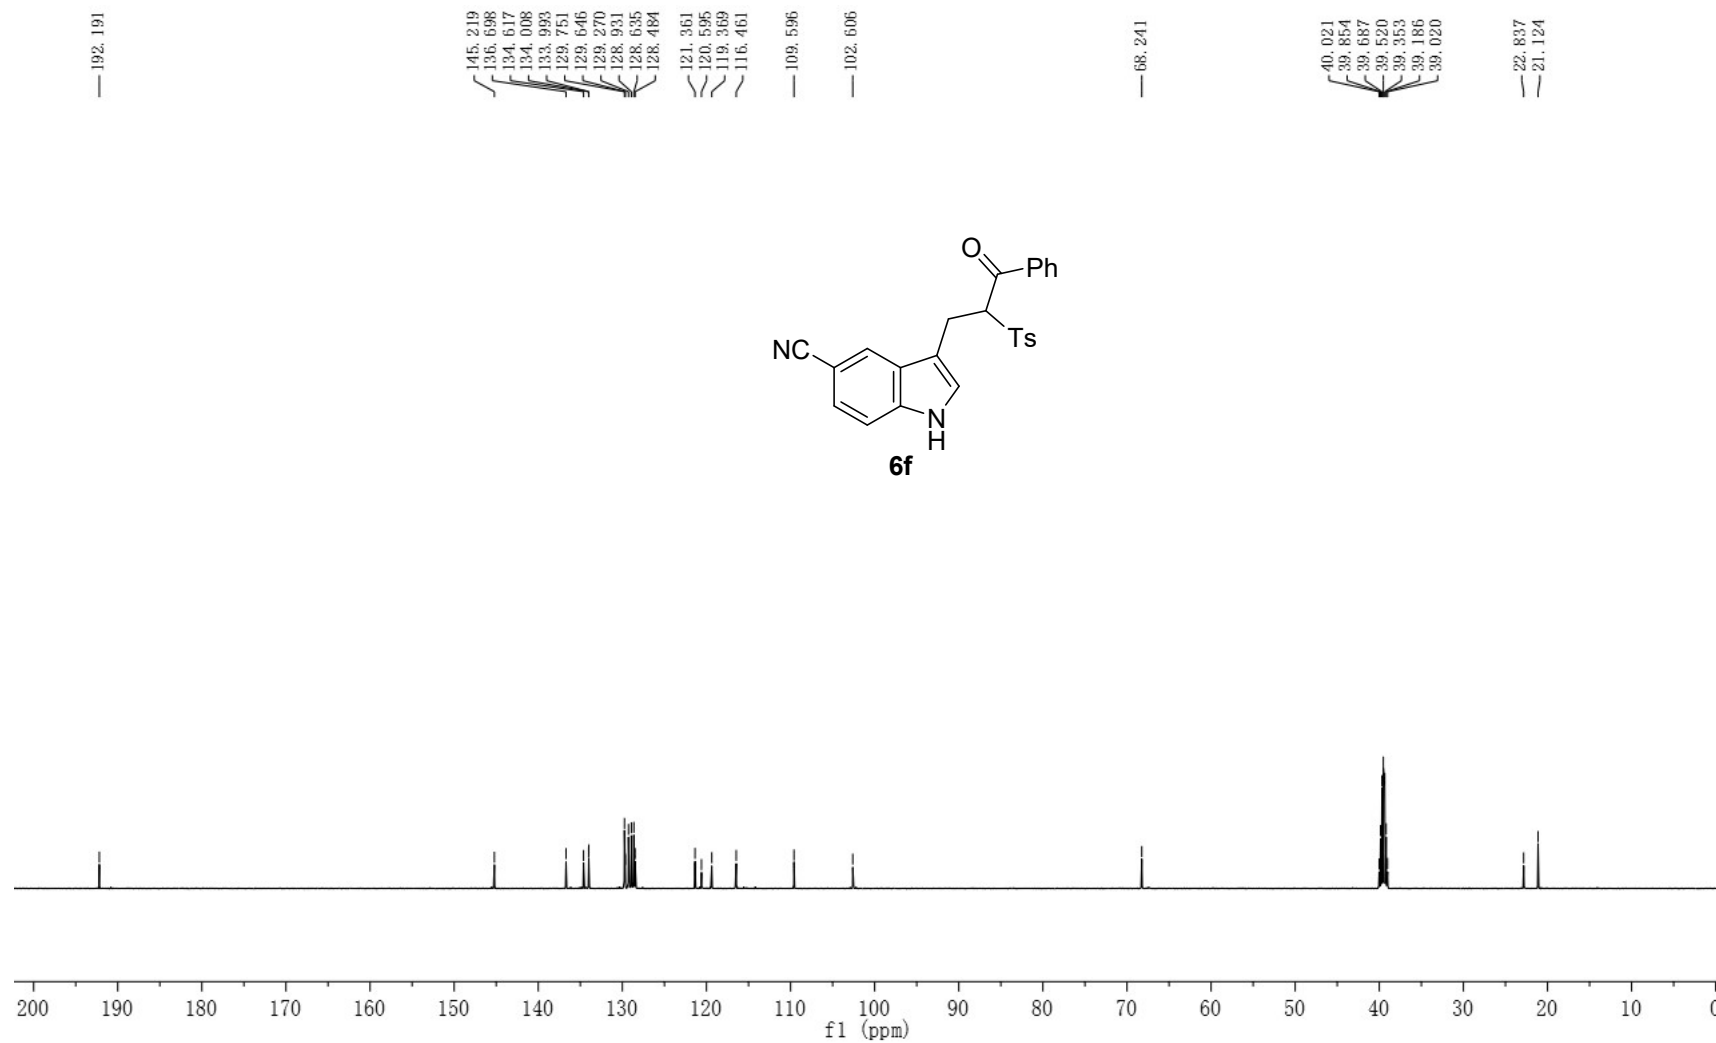

<sup>1</sup>H NMR (500 MHz, CDCl<sub>3</sub>) of **6g**

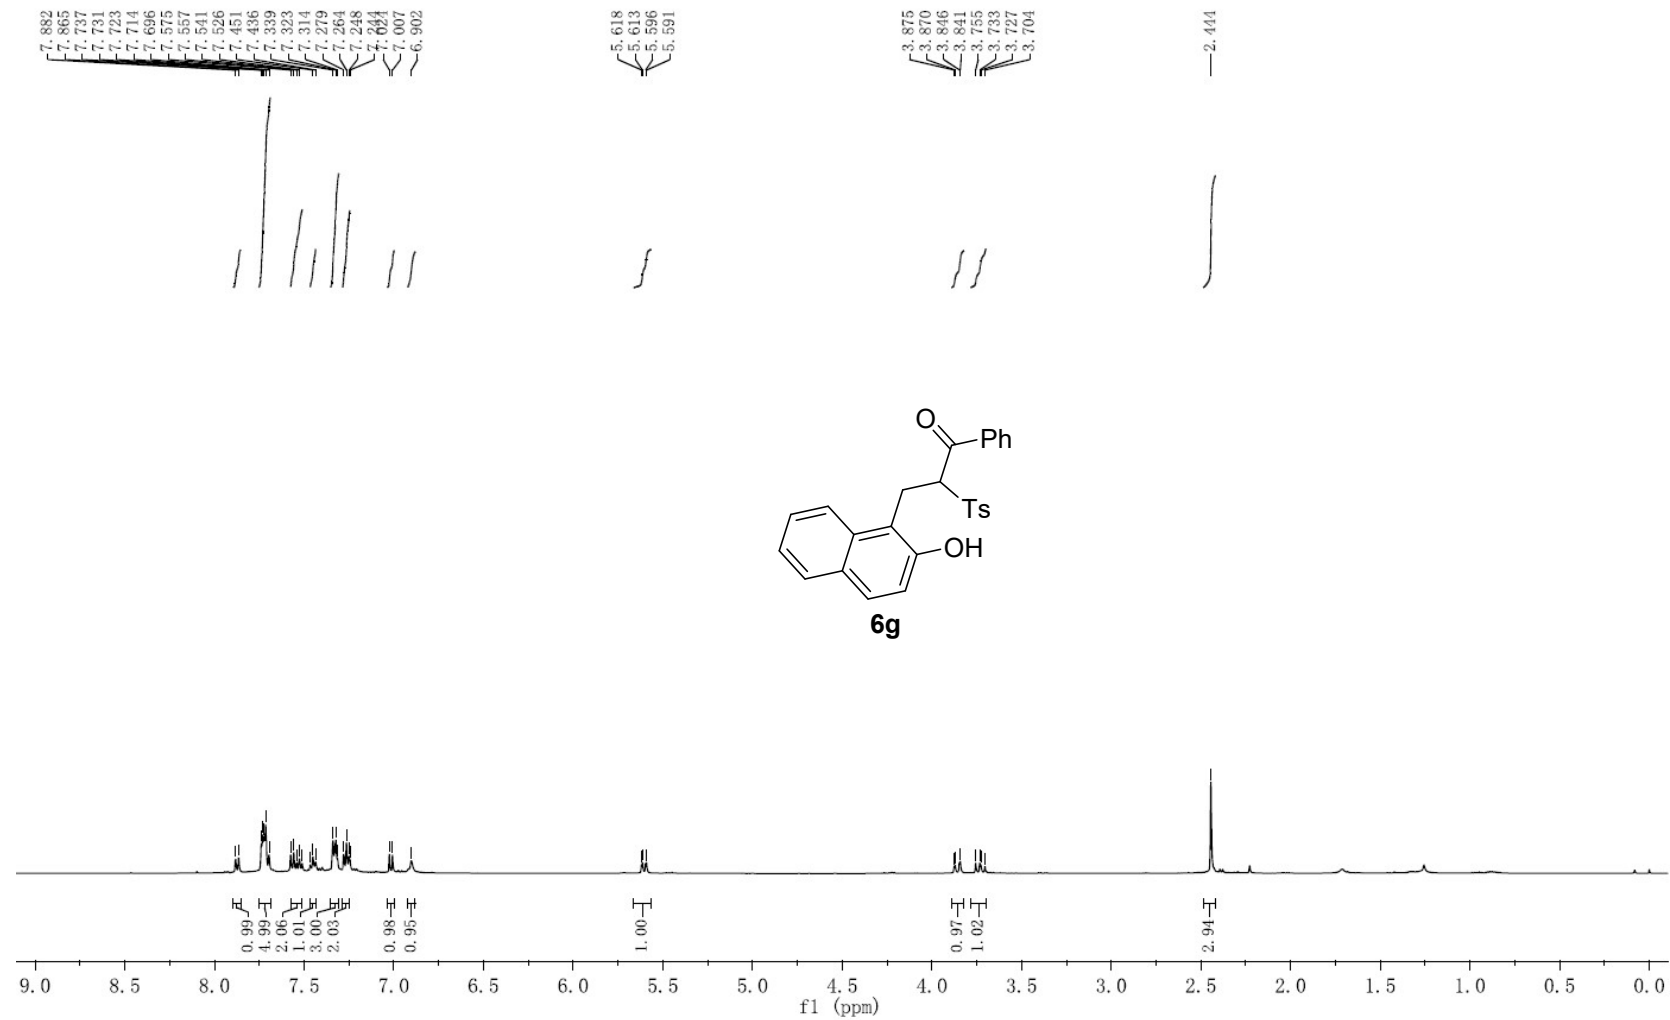

$^{13}\text{C}$  NMR (126 MHz,  $\text{CDCl}_3$ ) of **6g**

194.515

152.011

146.006

136.433

134.555

133.062

132.721

129.936

129.767

129.697

129.590

129.430

128.964

128.576

127.392

123.458

121.684

119.215

113.032

77.400

77.150

76.898

69.555

23.621

21.788

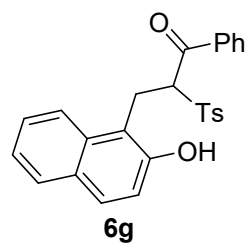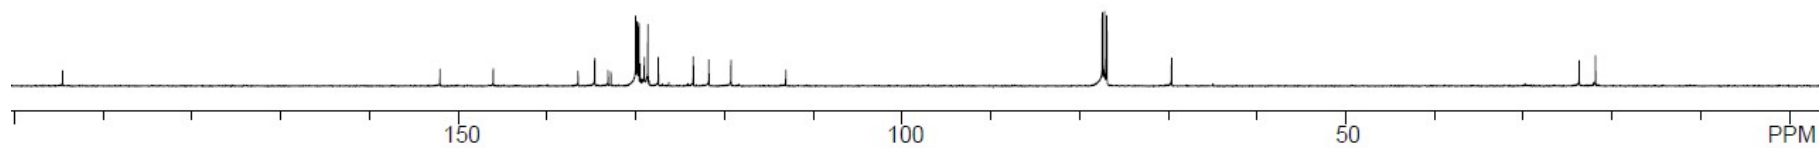

HRMS (ESI) of **6g**

ms2 133.4-2000\_220707155742 #10 RT: 0.09 AV: 1 NL: 7.59E6  
T: FTMS - p ESI Full ms [150.0000-600.0000]

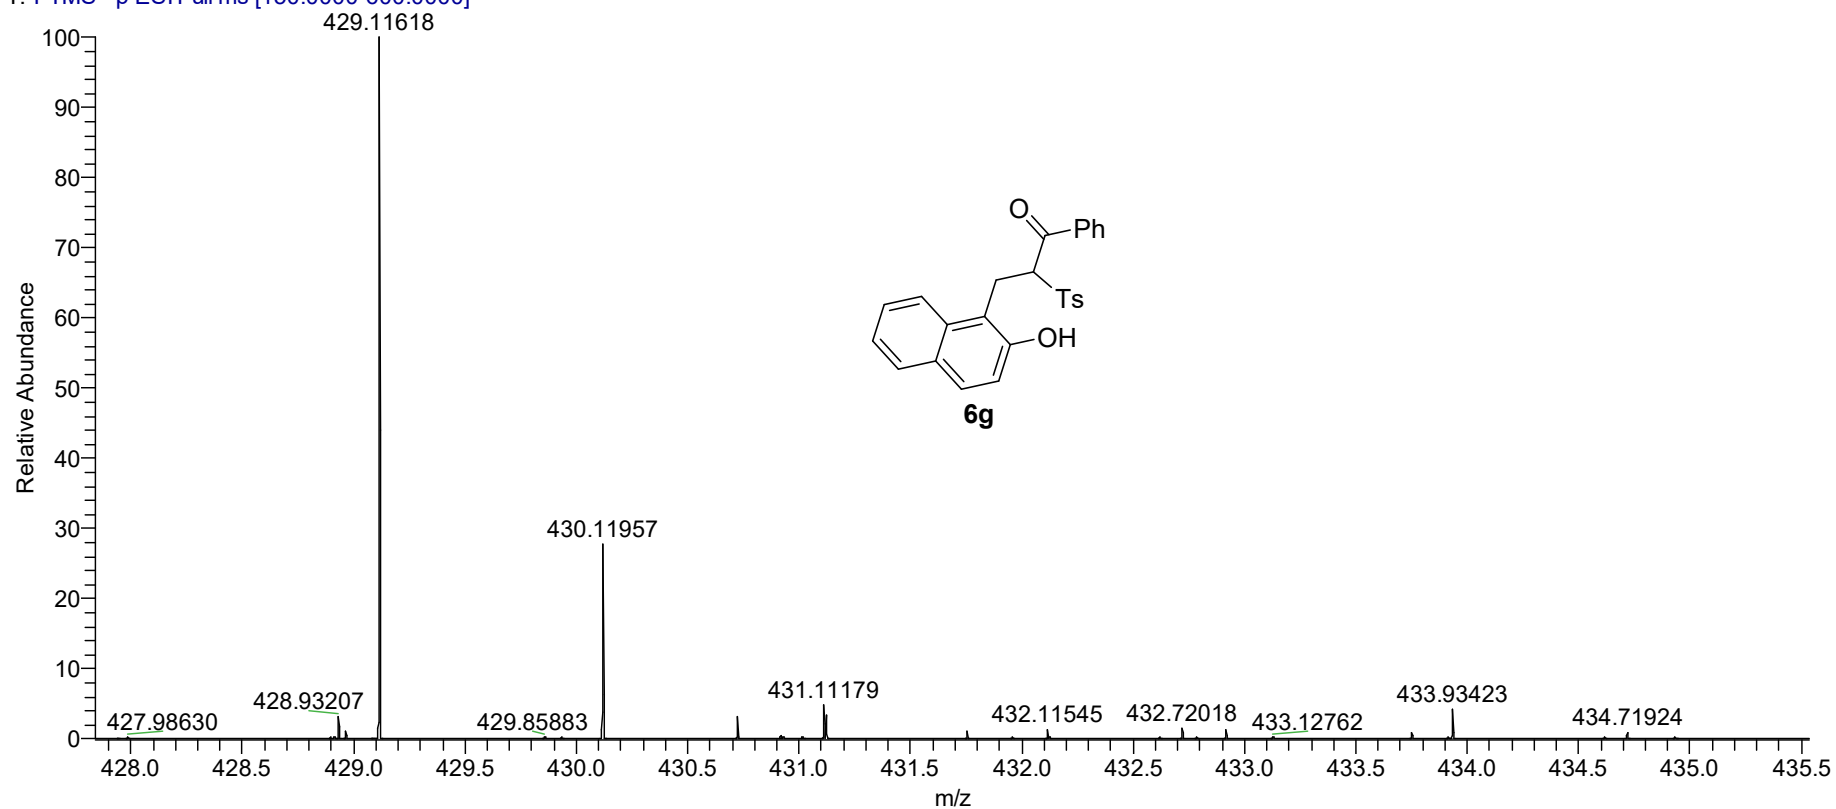



<sup>1</sup>H NMR (500 MHz, DMSO-d<sub>6</sub>) of **6h**

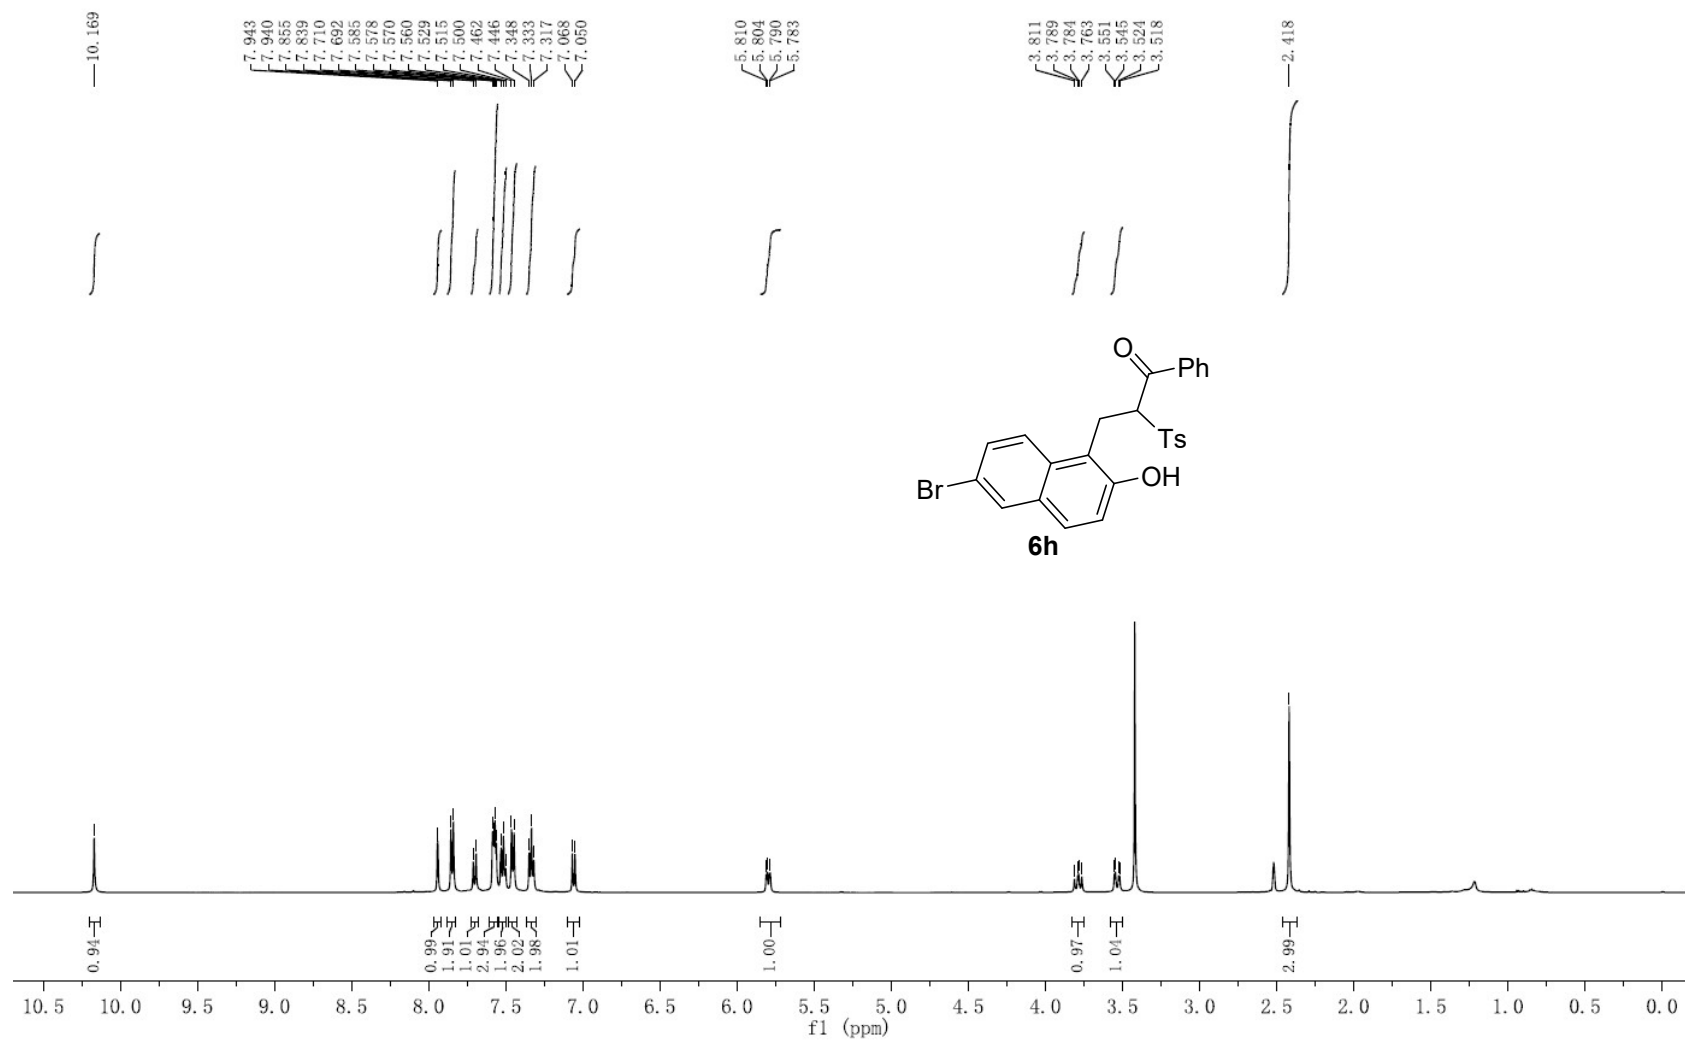

$^{13}\text{C}$  NMR (126 MHz, DMSO- $d_6$ ) of **6h**

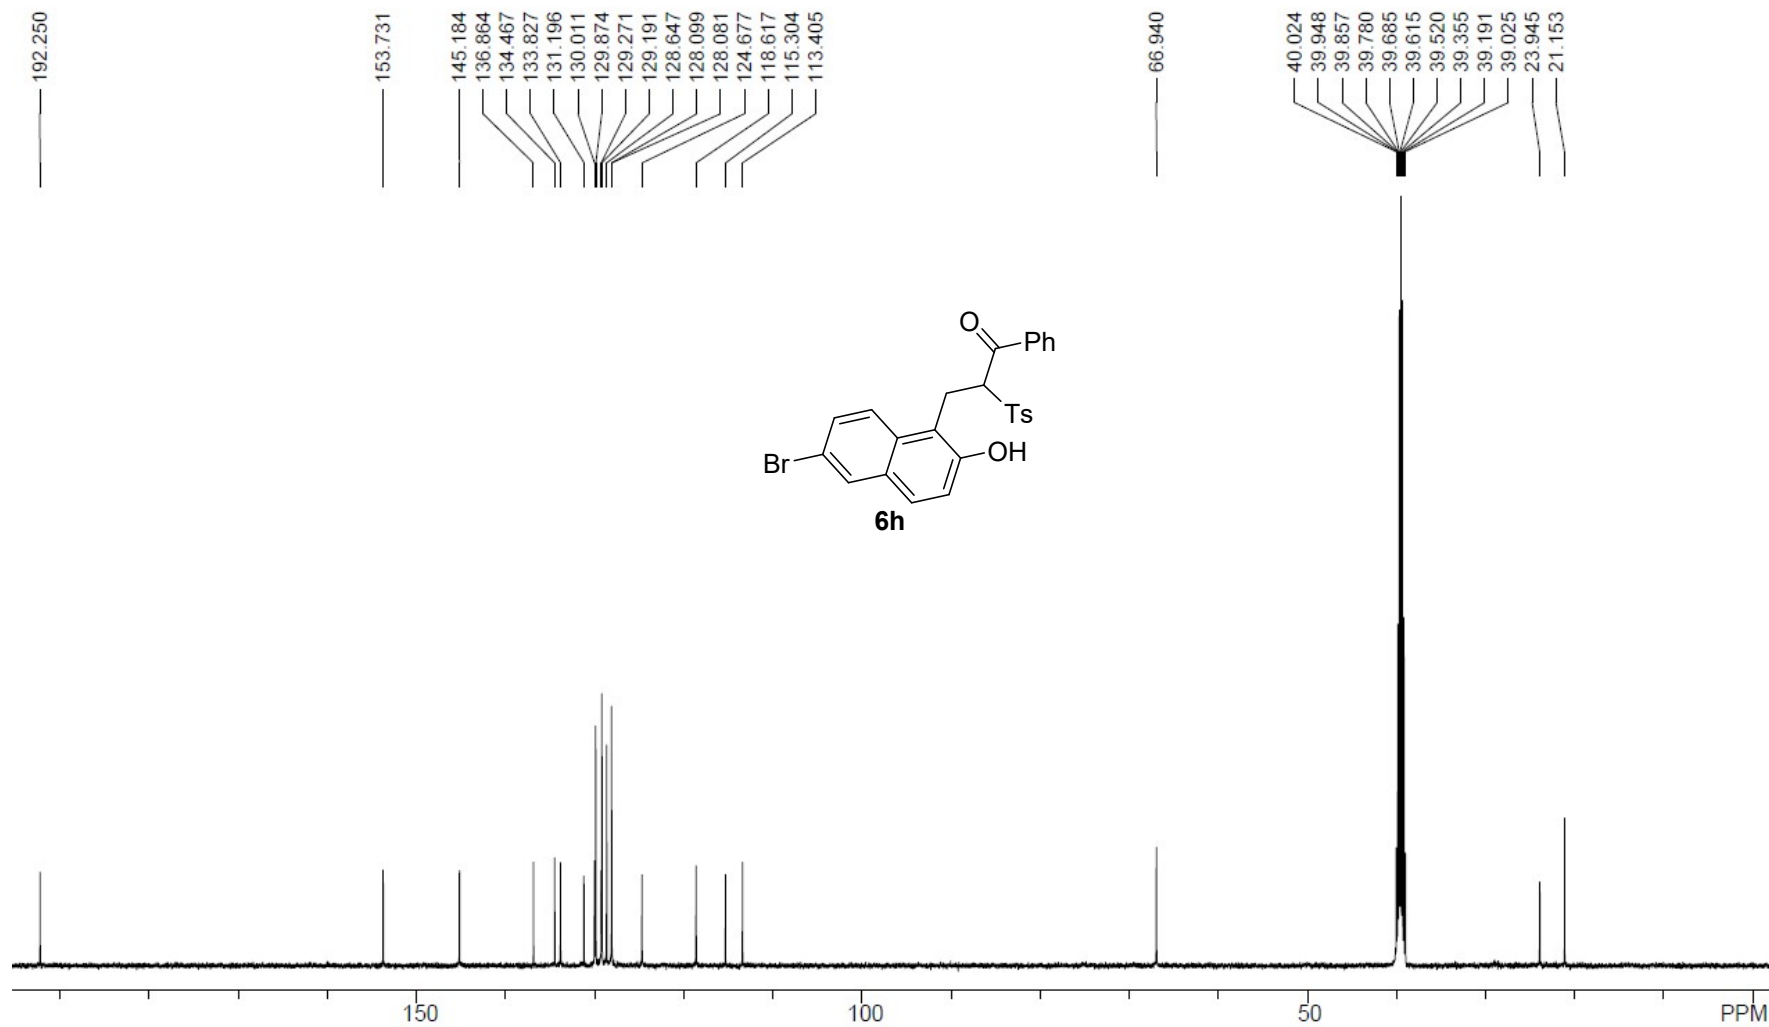

$^1\text{H}$  NMR (500 MHz, DMSO- $d_6$ ) of **6i**

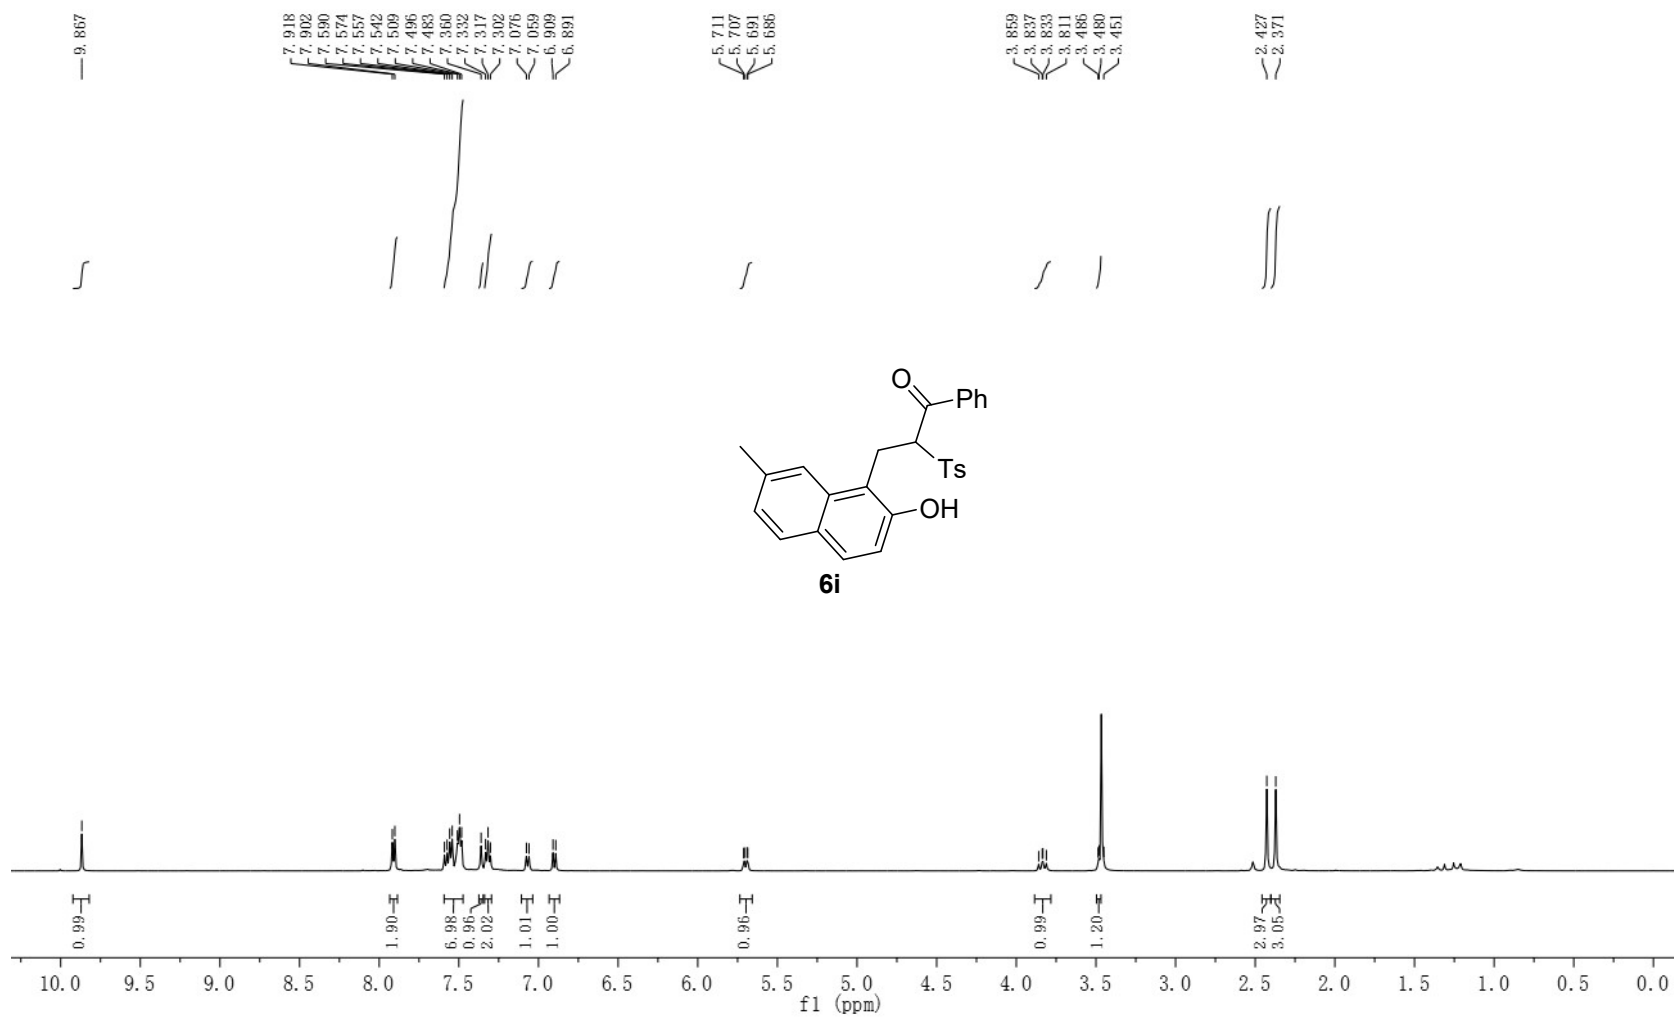

$^{13}\text{C}$  NMR (126 MHz, DMSO- $d_6$ ) of **6i**

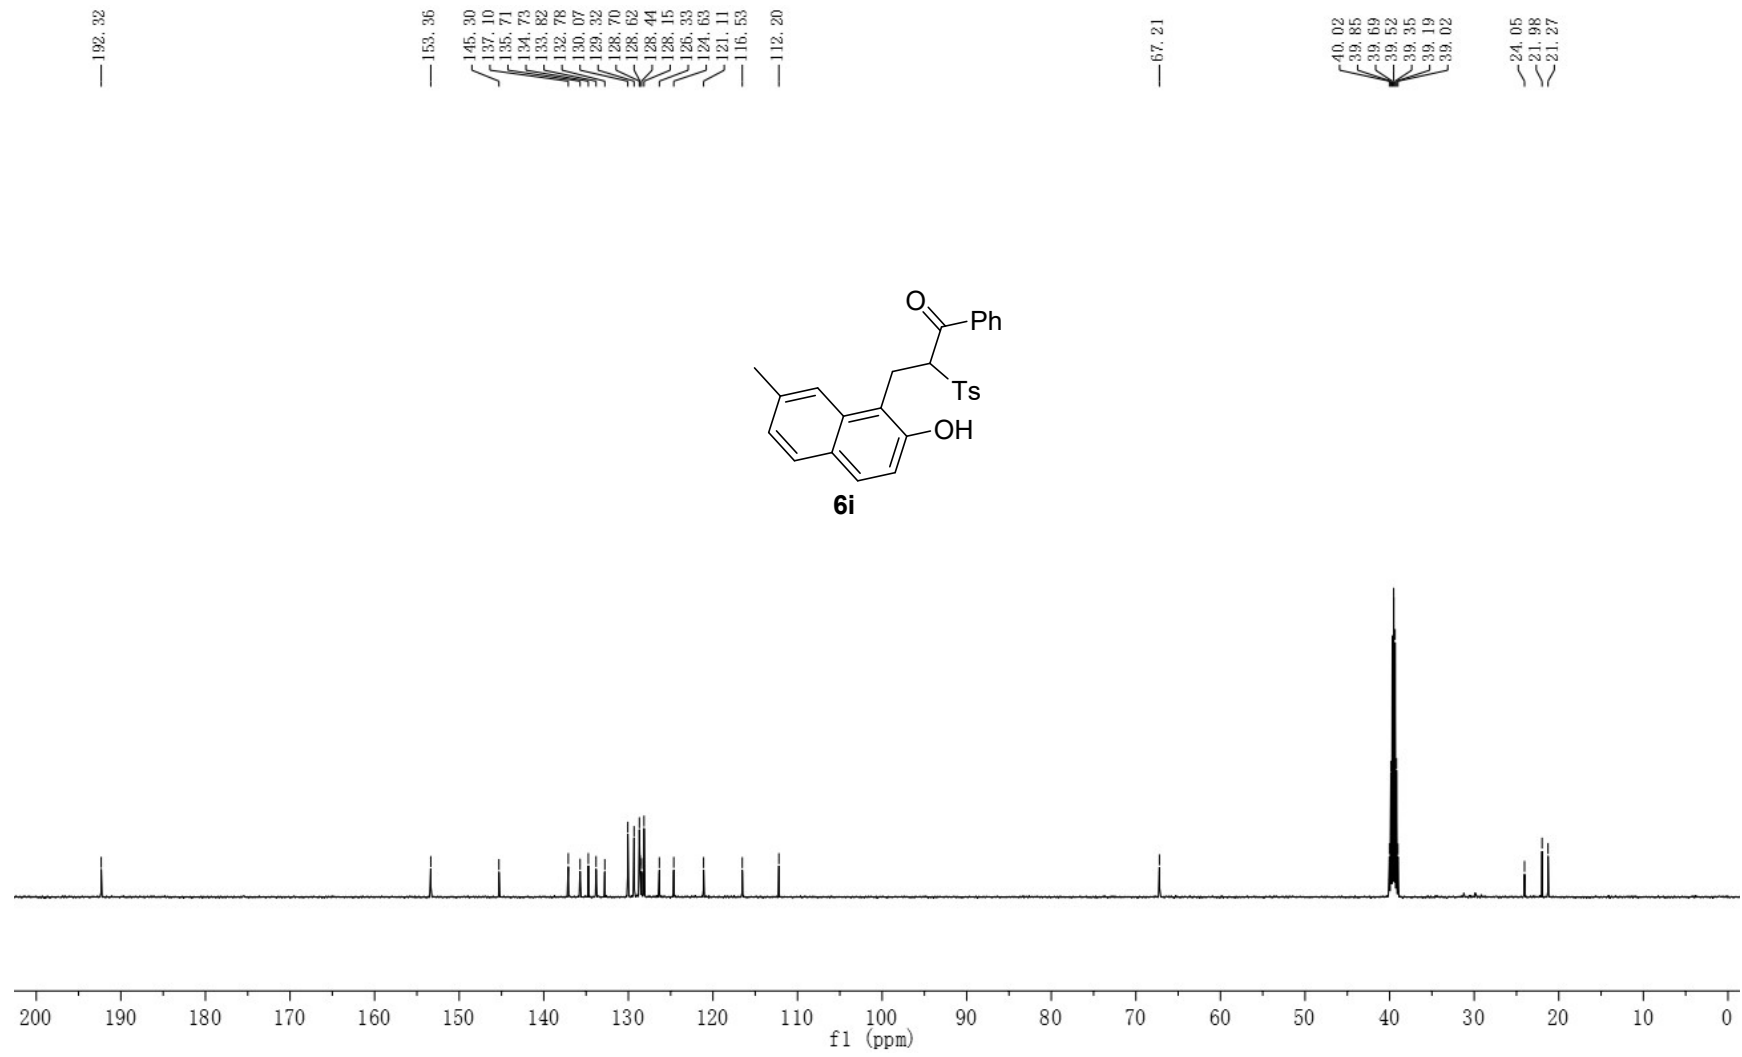

<sup>1</sup>H NMR (500 MHz, CDCl<sub>3</sub>) of **9a**

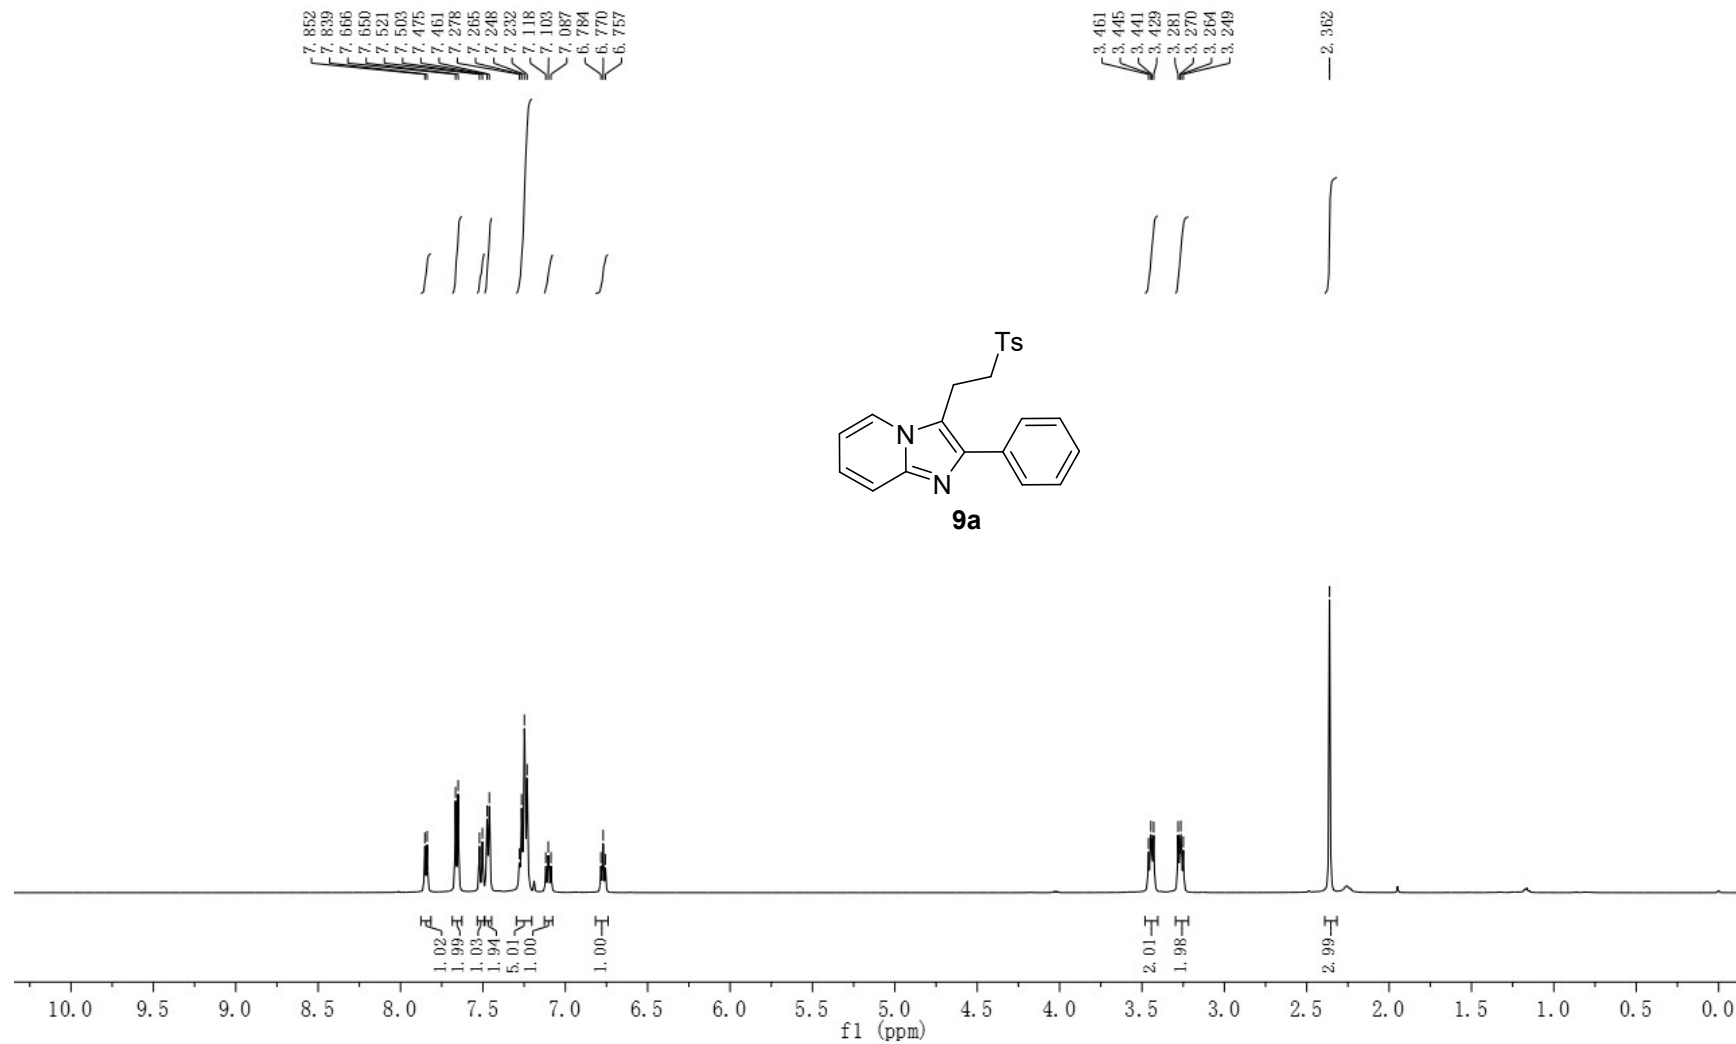

$^{13}\text{C}$  NMR (126 MHz,  $\text{CDCl}_3$ ) of **9a**

145.18  
144.83  
143.25  
135.40  
134.02  
130.09  
128.72  
127.96  
127.87  
127.85  
124.41  
122.65  
117.83  
115.27  
112.81

77.40  
77.15  
76.90

53.15

21.71  
17.73

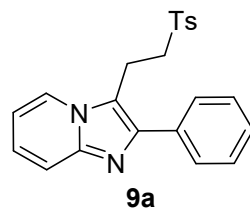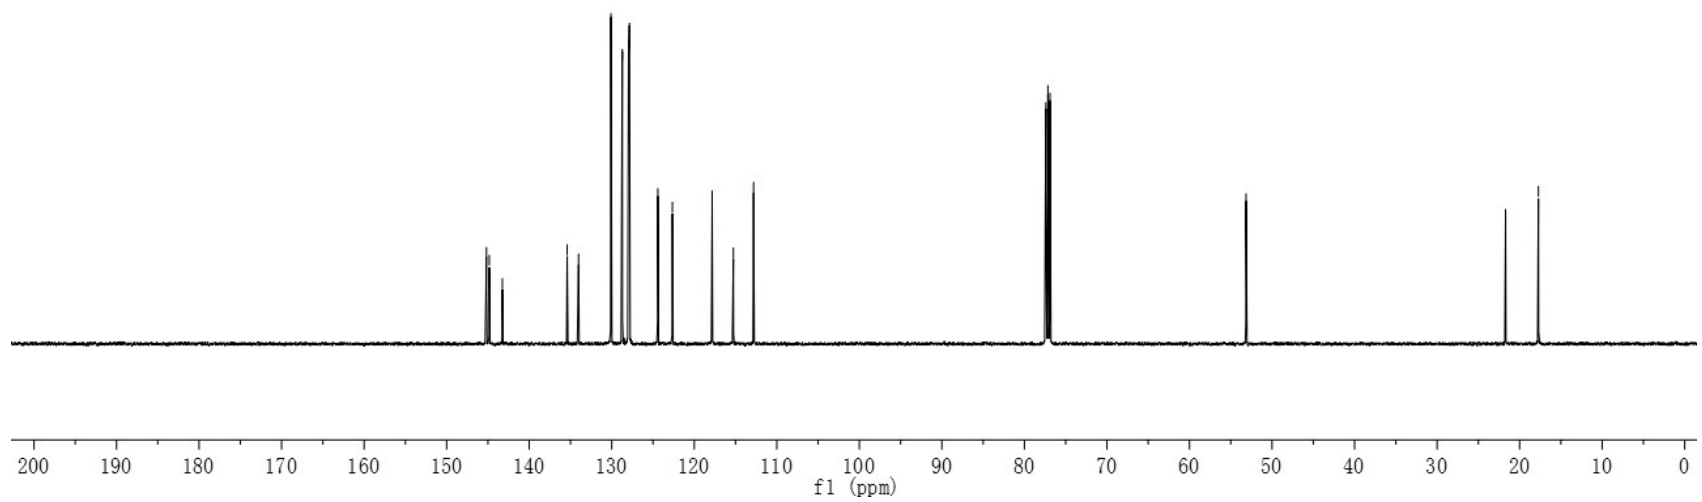

HRMS (ESI) of **9a**

1

GT-2 11 (0.204) AM (Med,4, Ht,5000.0,0.00,1.00); Sm (Mn, 2x3.00); Cm (2:13)

07-Jun-2023

TOF MS ES+  
1.04e3

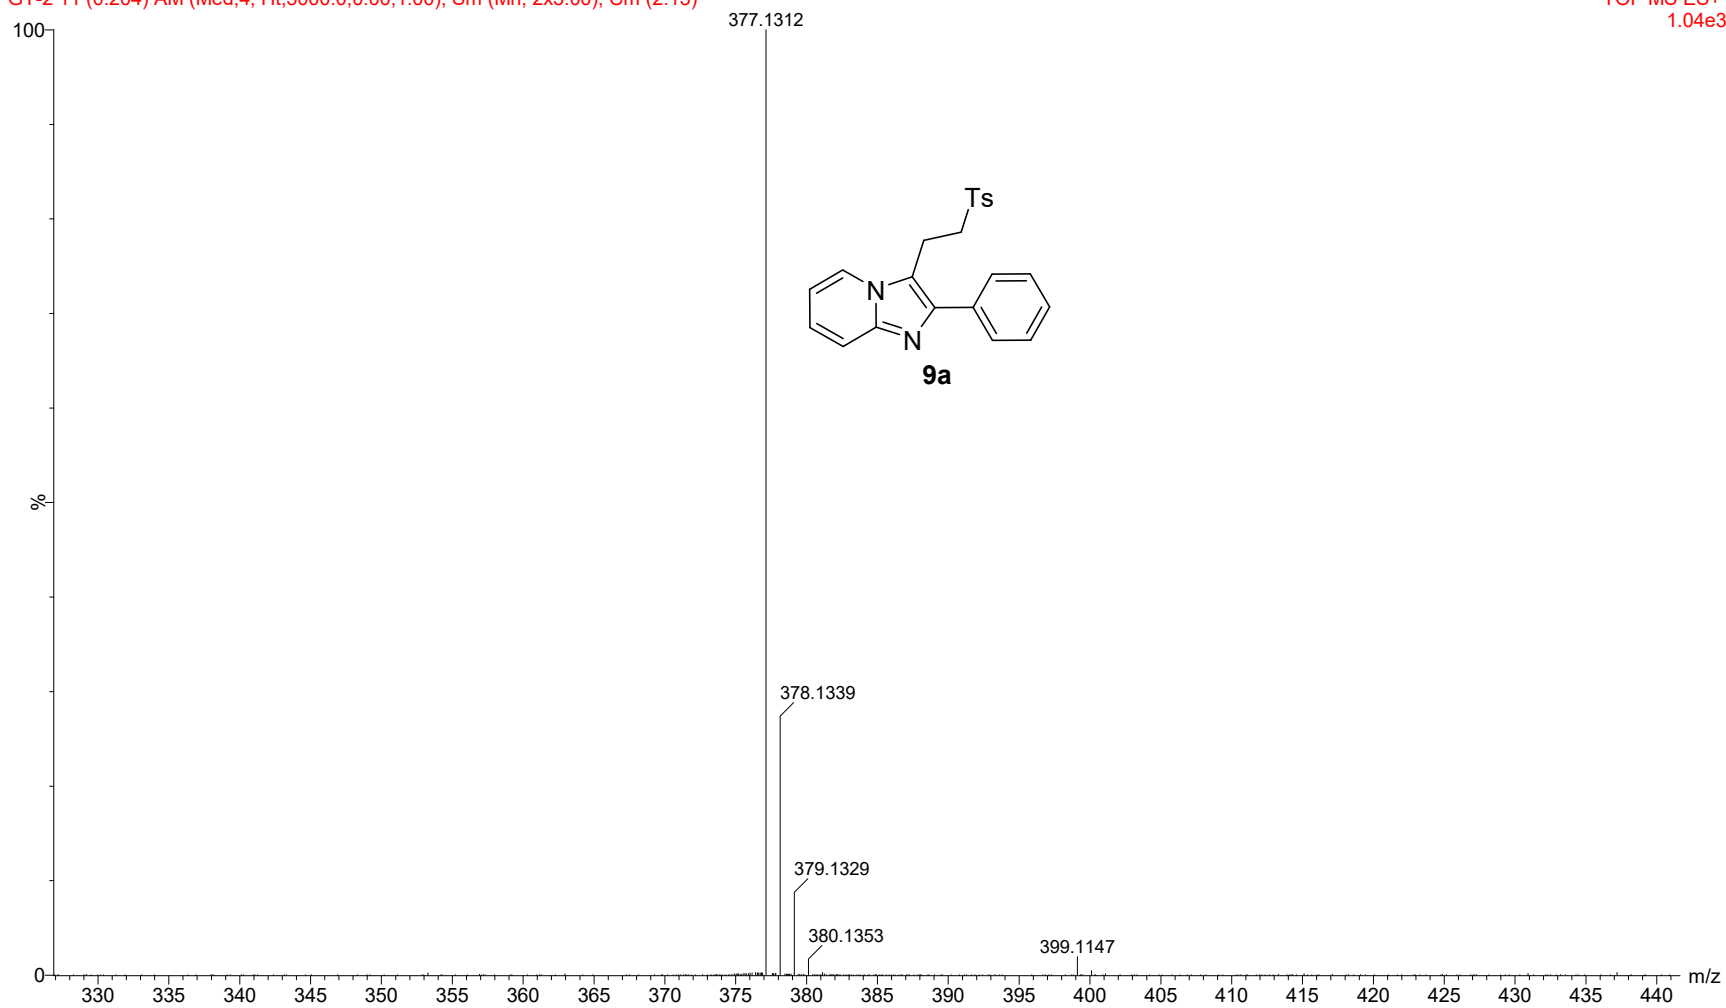

<sup>1</sup>H NMR (500 MHz, CDCl<sub>3</sub>) of **9b**

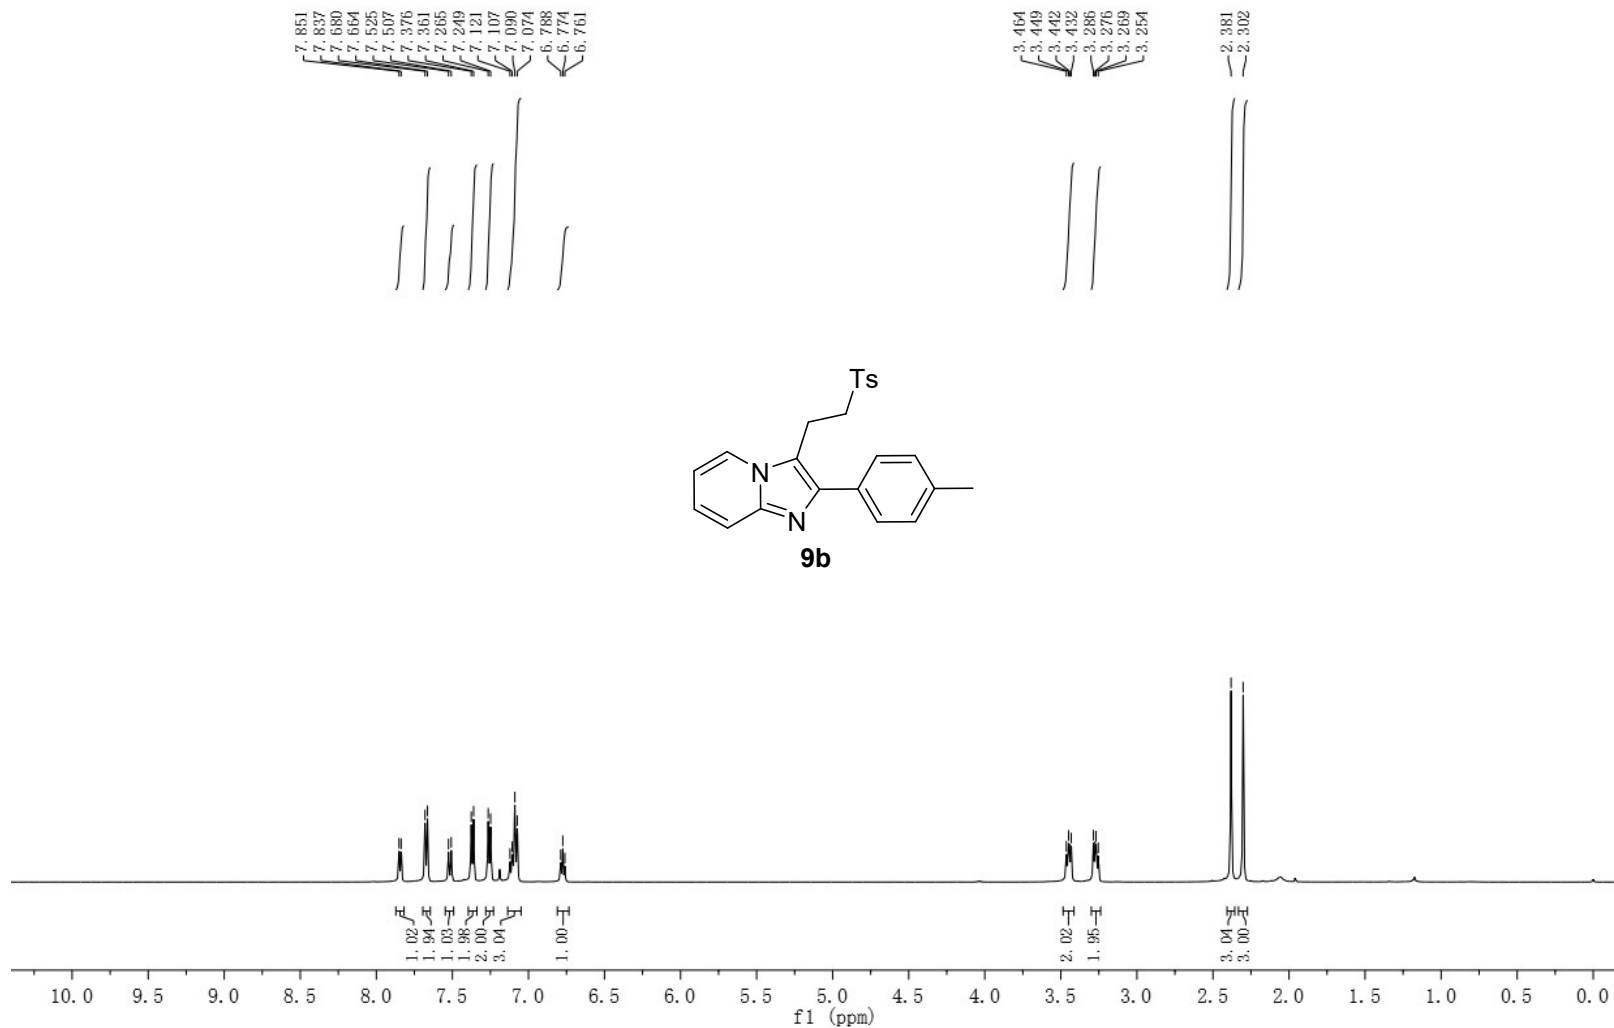



$^{13}\text{C}$  NMR (126 MHz,  $\text{CDCl}_3$ ) of **9b**

145.186  
144.835  
143.391  
137.738  
135.494  
131.151  
130.131  
129.499  
128.019  
127.742  
124.313  
122.596  
117.813  
114.973  
112.755

77.404  
77.150  
76.895

53.208

21.752  
21.349  
17.803

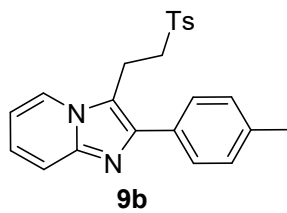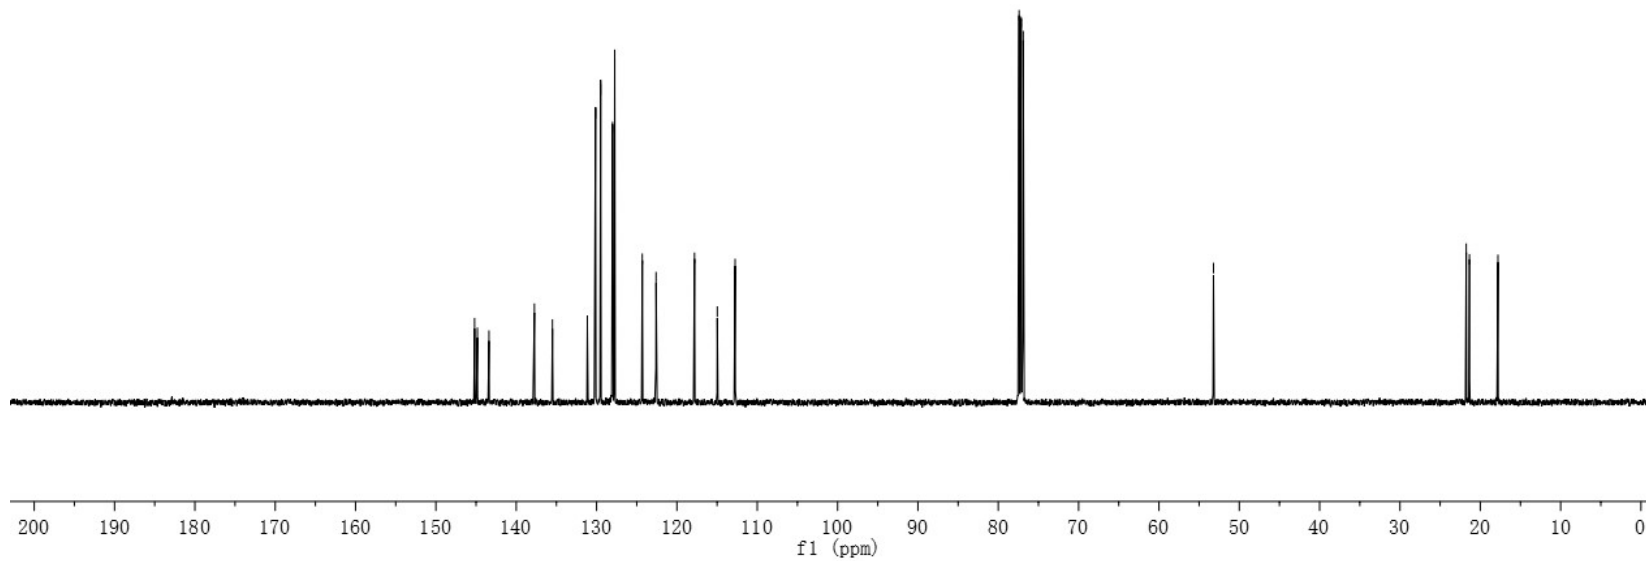

<sup>1</sup>H NMR (500 MHz, CDCl<sub>3</sub>) of **9c**

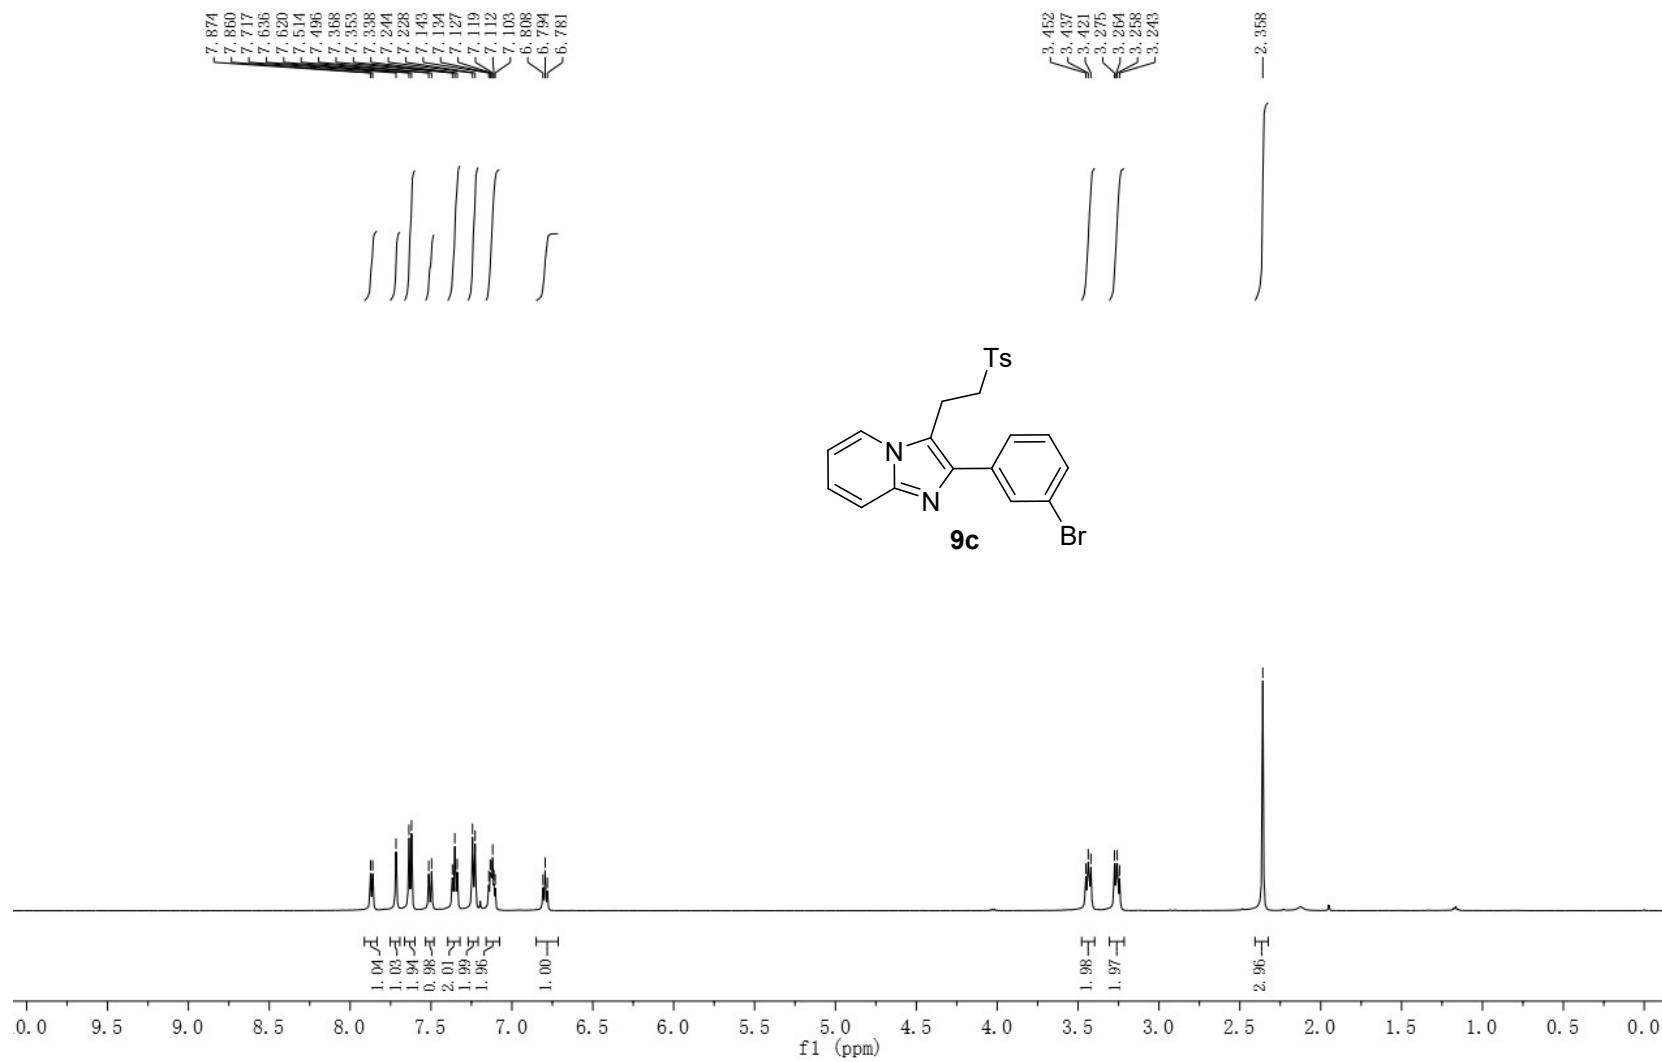

$^{13}\text{C}$  NMR (126 MHz,  $\text{CDCl}_3$ ) of **9c**

145.250  
144.869  
141.726  
136.164  
135.335  
131.039  
130.841  
130.160  
127.847  
126.097  
124.783  
122.995  
122.780  
117.915  
115.733  
113.057

77.405  
77.150  
76.896

53.097

21.736  
17.676

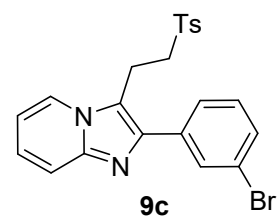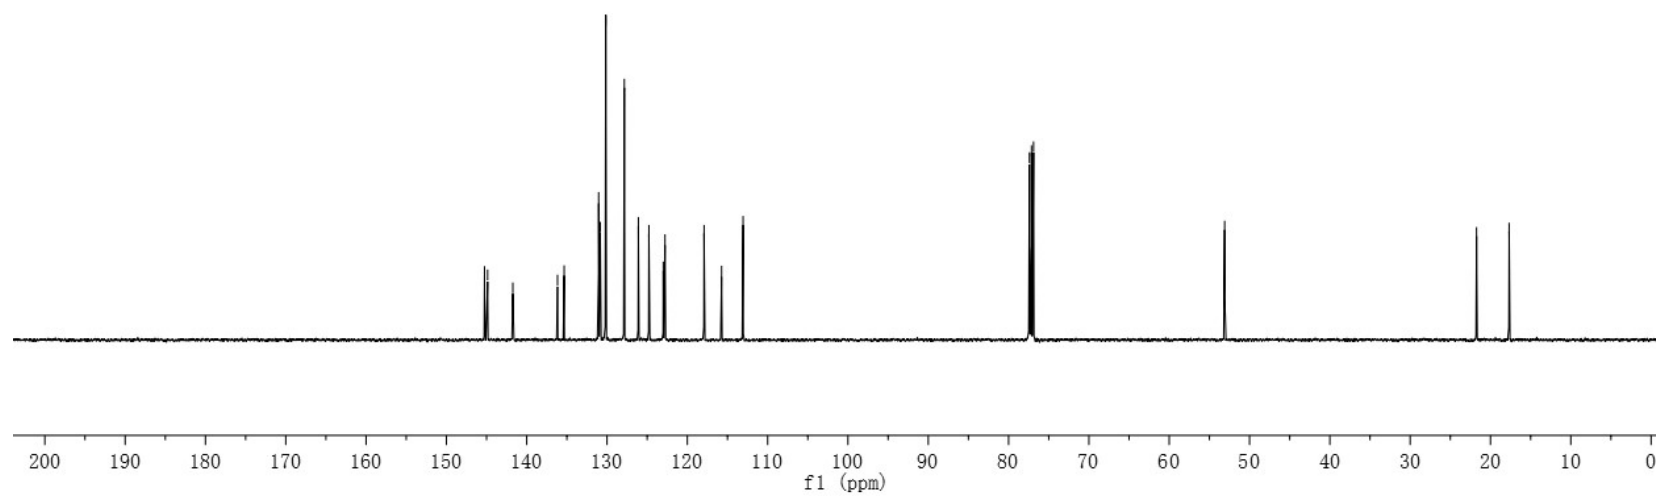

<sup>1</sup>H NMR (500 MHz, CDCl<sub>3</sub>) of **9d**

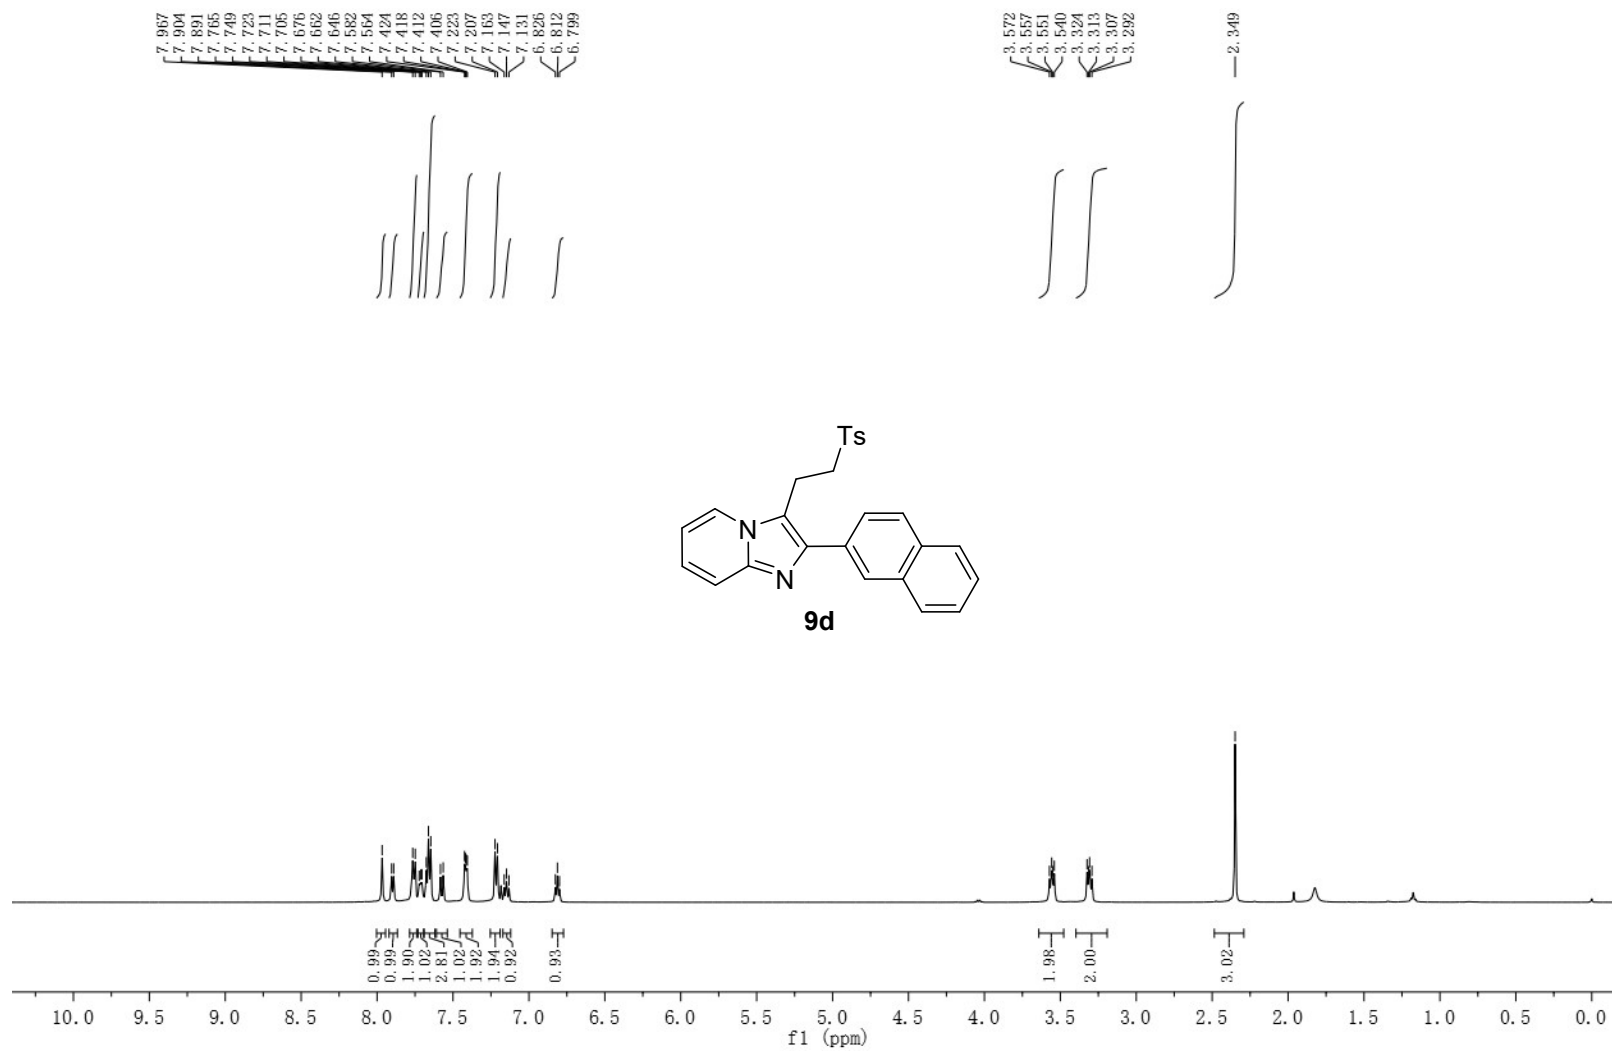

$^{13}\text{C}$  NMR (126 MHz,  $\text{CDCl}_3$ ) of **9d**

145.267  
145.050  
143.263  
135.507  
133.518  
132.918  
131.490  
130.179  
128.510  
128.418  
128.008  
127.760  
126.935  
126.415  
126.388  
125.774  
124.605  
122.710  
117.956  
115.701  
112.970

77.404  
77.150  
76.896

53.303

21.763  
17.950

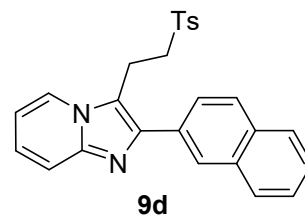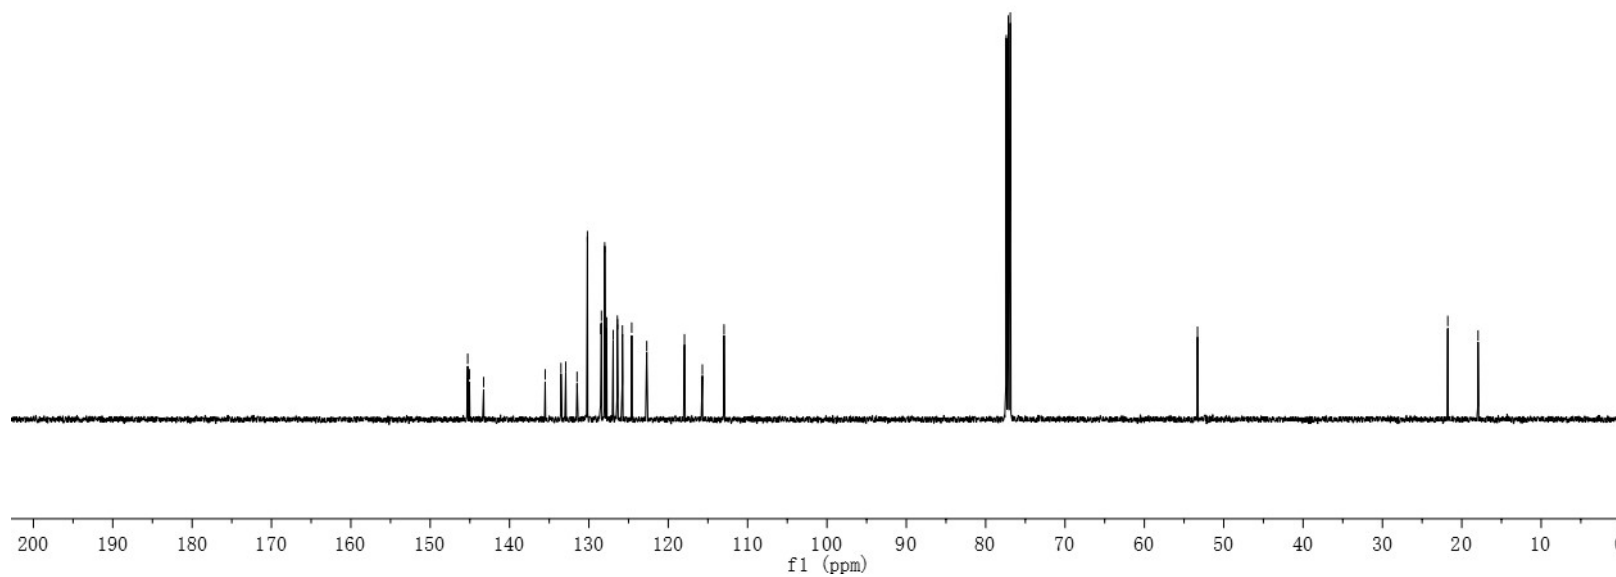

<sup>1</sup>H NMR (500 MHz, CDCl<sub>3</sub>) of **9e**

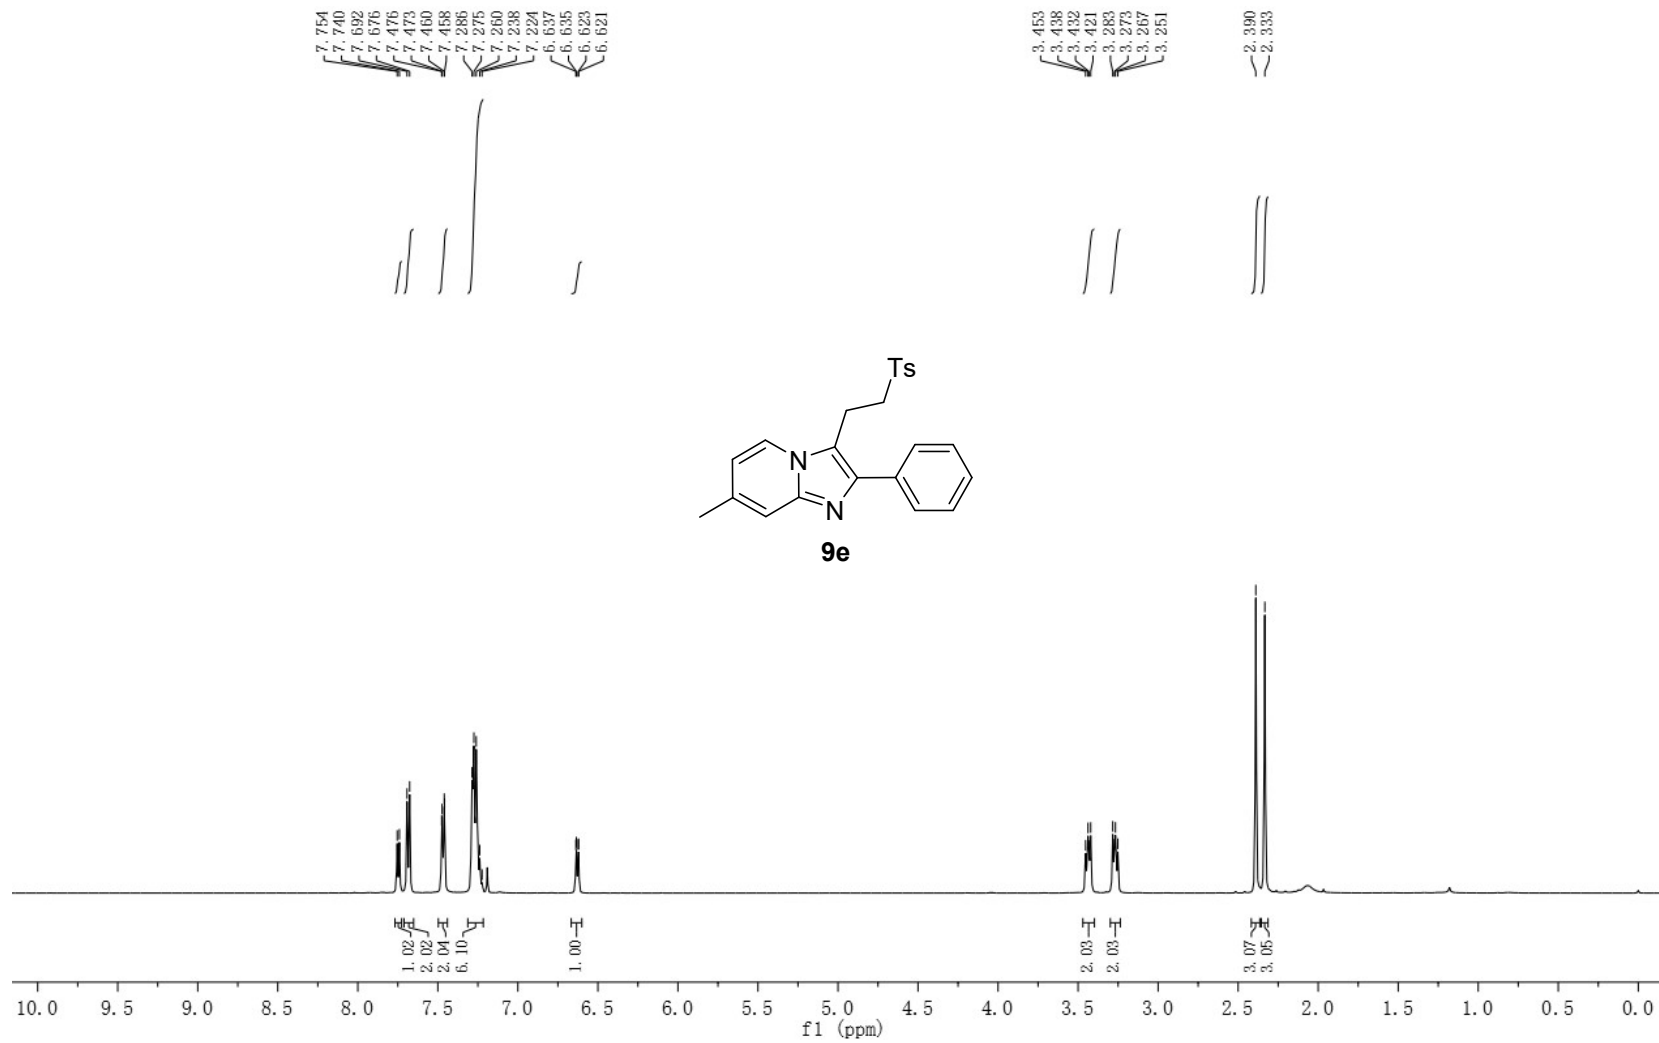

$^{13}\text{C}$  NMR (126 MHz,  $\text{CDCl}_3$ ) of **9e**

145.24  
145.14  
142.82  
135.41  
134.15  
130.08  
128.66  
127.97  
127.75  
127.69  
121.87  
116.15  
115.39  
114.62

77.41  
77.15  
76.90

53.26

21.69  
21.30  
17.73

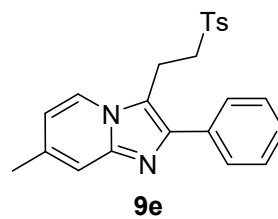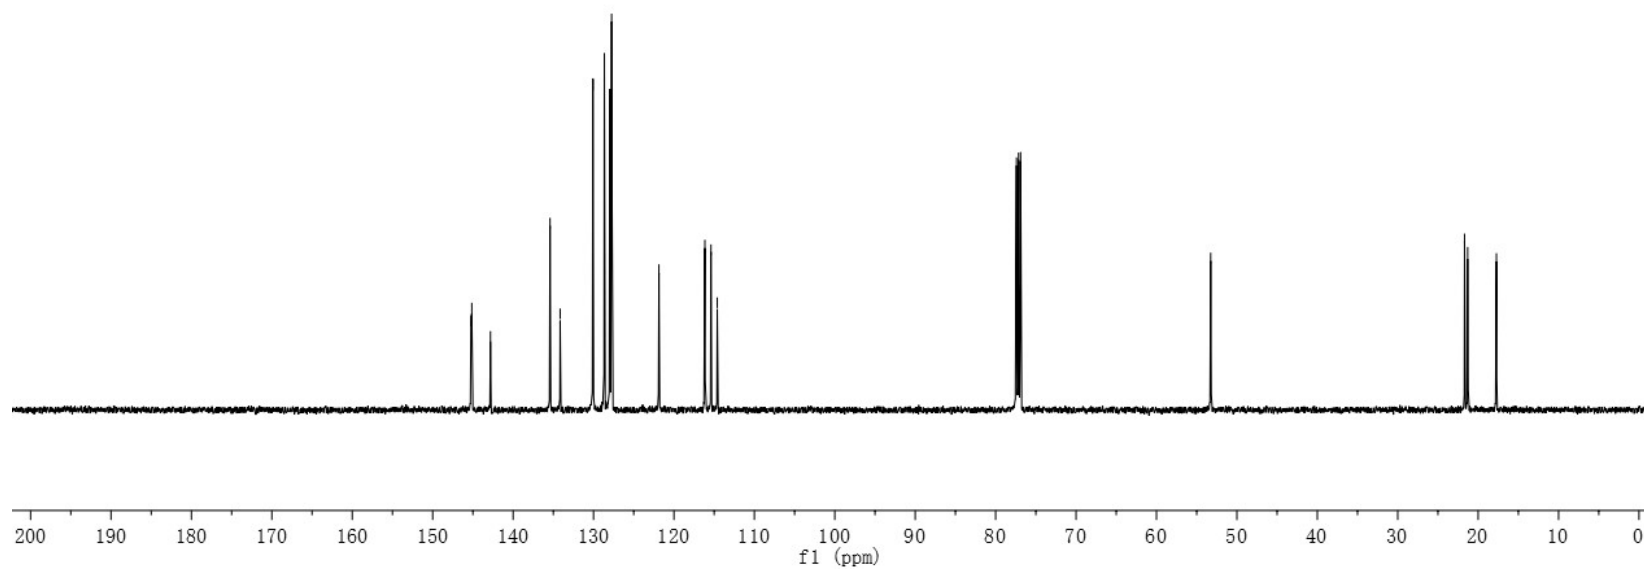

<sup>1</sup>H NMR (500 MHz, CDCl<sub>3</sub>) of **9f**

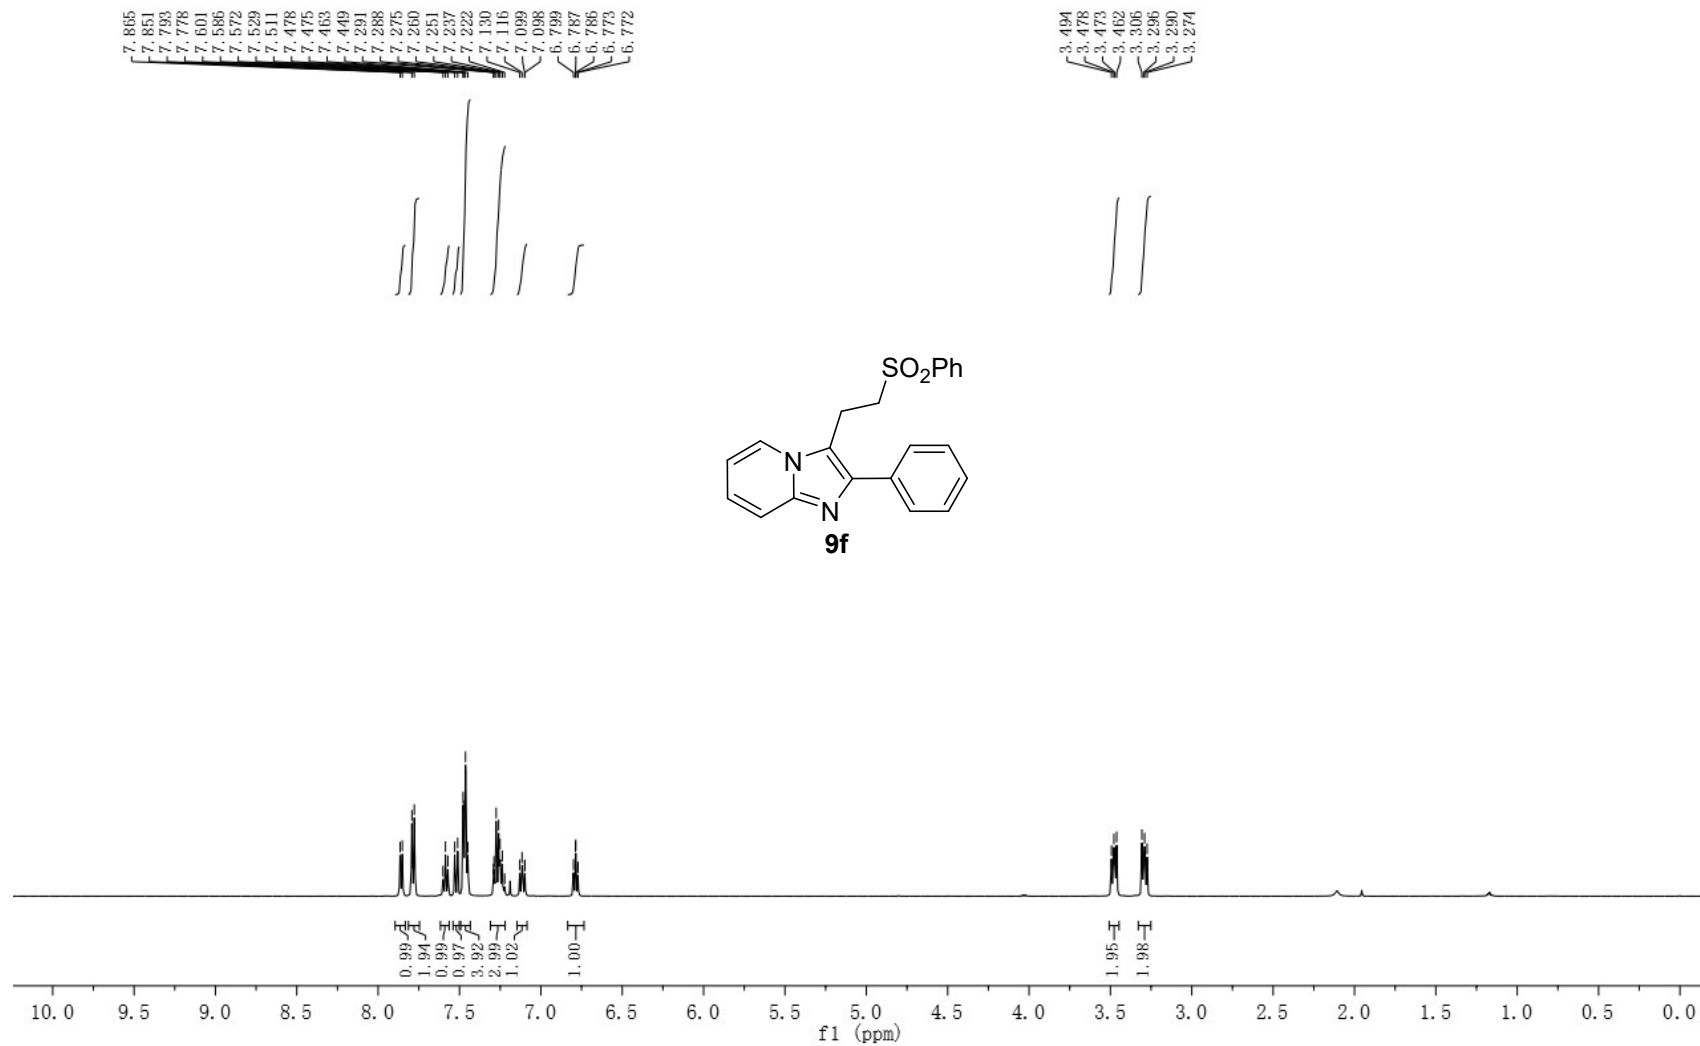



$^{13}\text{C}$  NMR (126 MHz,  $\text{CDCl}_3$ ) of **9f**

144.88  
143.35  
138.44  
134.14  
134.02  
129.53  
128.80  
127.95  
127.85  
124.45  
122.53  
117.93  
115.13  
112.87

77.40  
77.15  
76.90

53.13

17.68

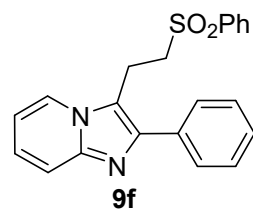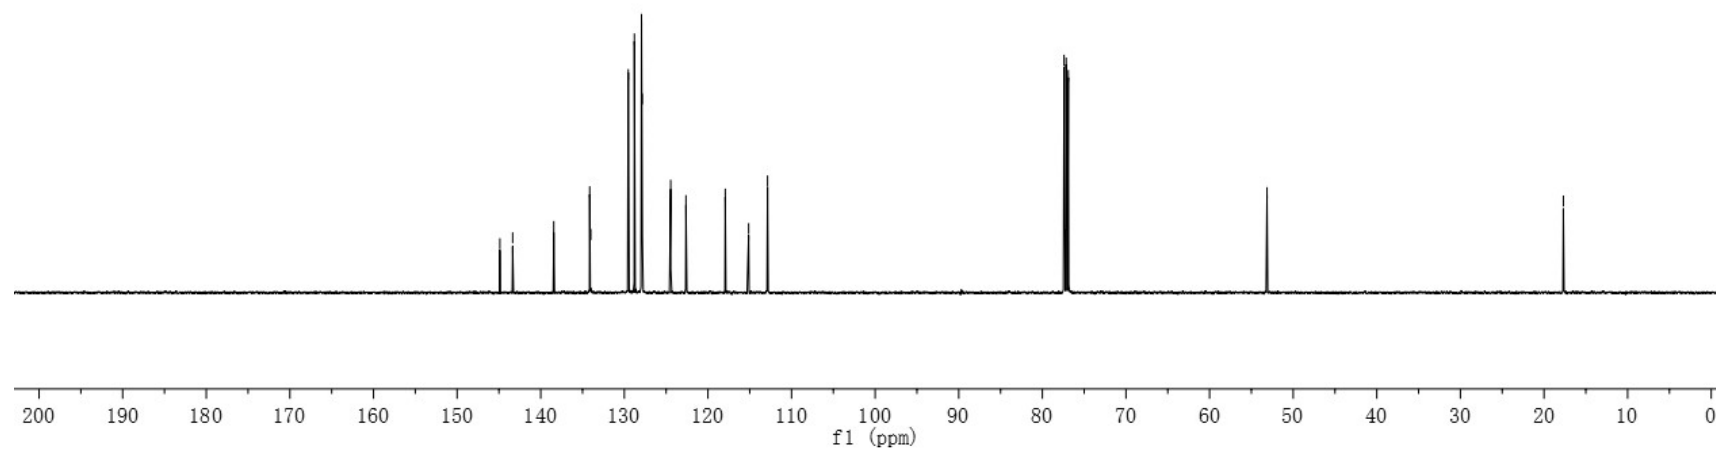

<sup>1</sup>H NMR (500 MHz, CDCl<sub>3</sub>) of **9g**

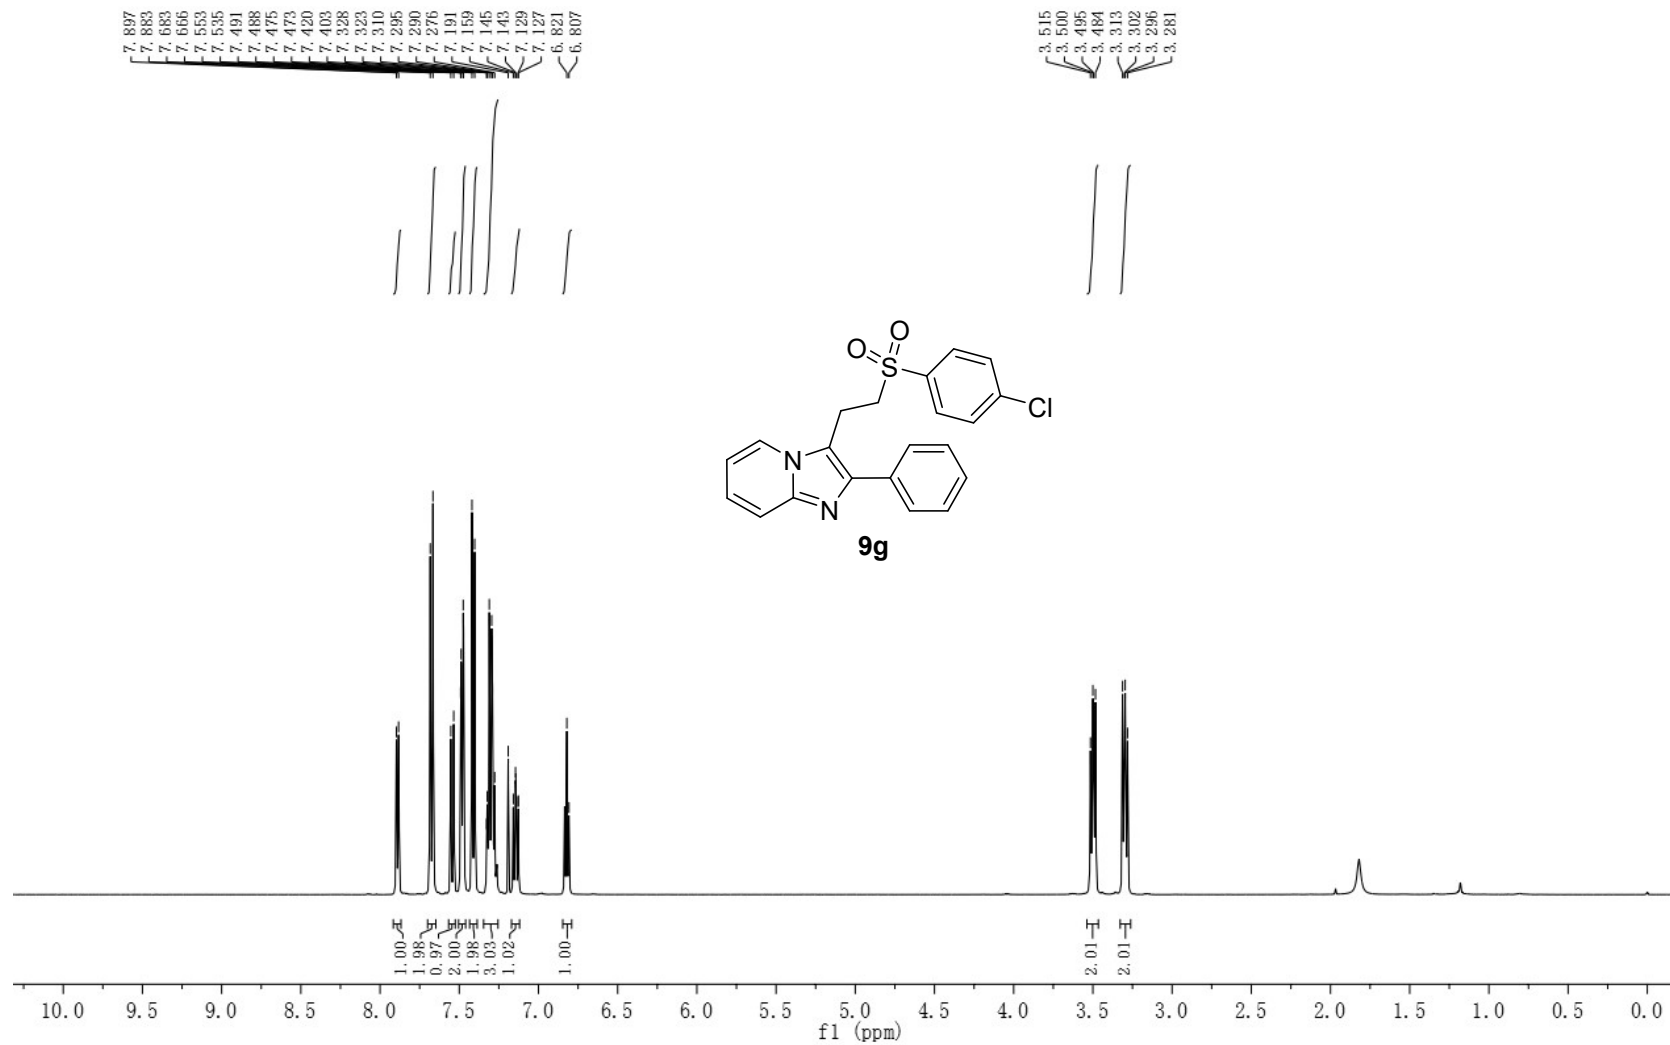

$^{13}\text{C}$  NMR (126 MHz,  $\text{CDCl}_3$ ) of **9g**

144.94  
143.52  
140.96  
136.87  
134.01  
129.82  
129.35  
128.86  
128.10  
127.90  
124.54  
122.63  
118.02  
114.98  
112.96

77.40  
77.15  
76.89

53.26

17.67

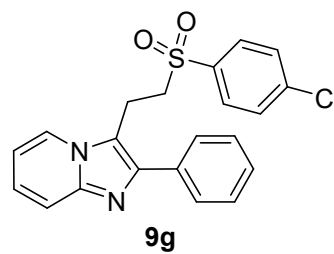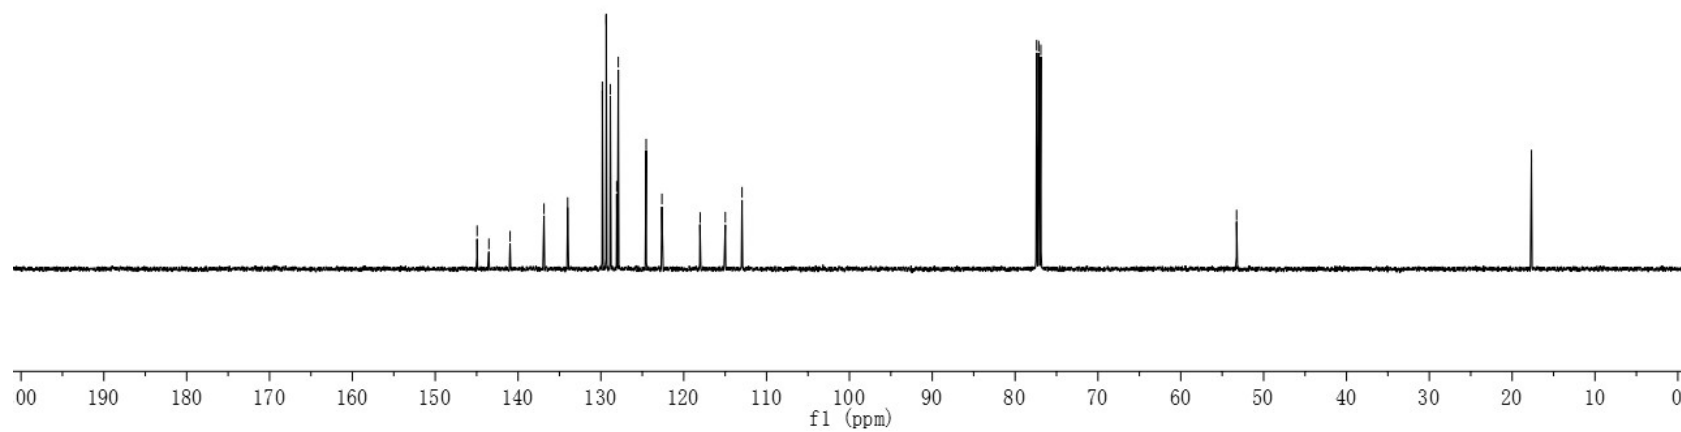

<sup>1</sup>H NMR (500 MHz, CDCl<sub>3</sub>) of **9h**

8.303  
7.849  
7.832  
7.825  
7.815  
7.799  
7.672  
7.669  
7.655  
7.652  
7.584  
7.570  
7.554  
7.524  
7.508  
7.483  
7.422  
7.404  
7.386  
7.373  
7.125  
7.111  
7.096  
7.084  
7.037  
7.022  
7.006  
6.719  
6.706  
6.683  
3.475  
3.461  
3.456  
3.444  
3.351  
3.341  
3.334  
3.320

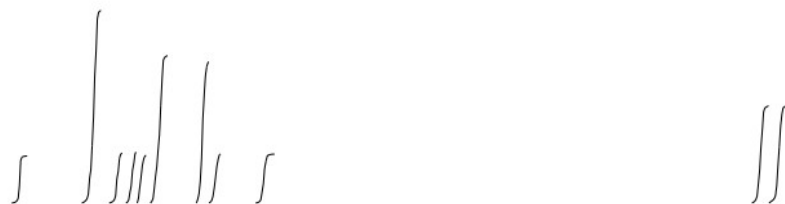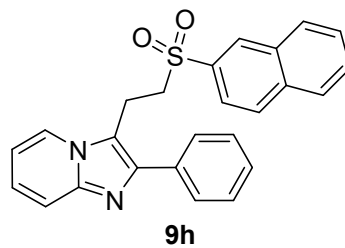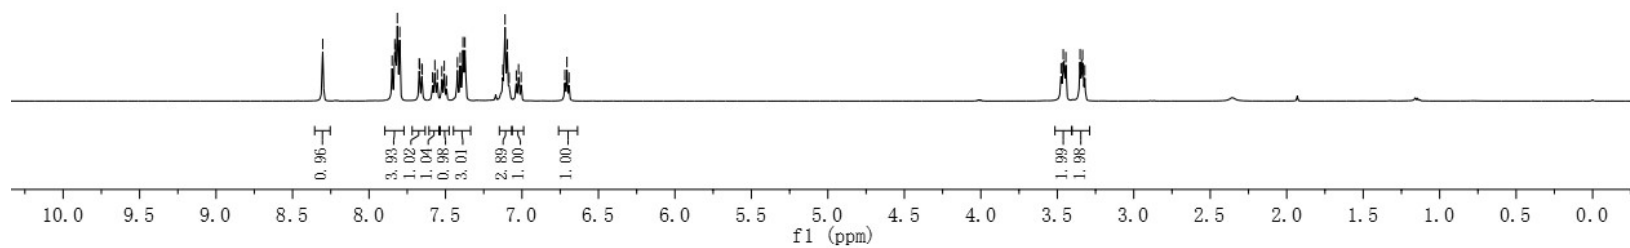

$^{13}\text{C}$  NMR (126 MHz,  $\text{CDCl}_3$ ) of **9h**

144.715  
143.214  
135.335  
135.075  
133.903  
132.031  
129.796  
129.742  
129.548  
129.456  
128.617  
128.010  
127.879  
127.814  
127.737  
124.350  
122.591  
122.255  
117.715  
115.145  
112.738

77.405  
77.150  
76.895

53.063

17.732

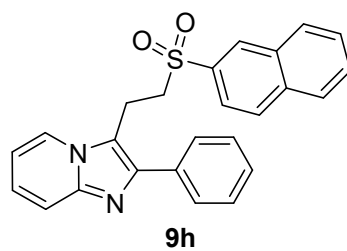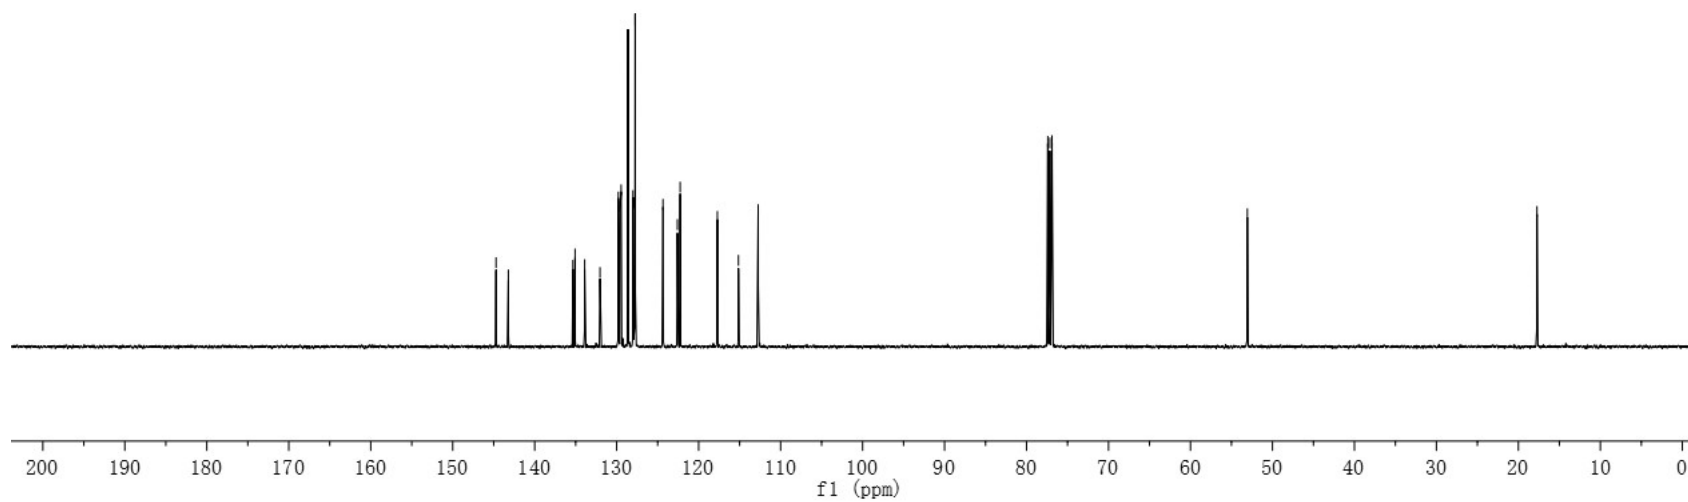

<sup>1</sup>H NMR (500 MHz, CDCl<sub>3</sub>) of **10**

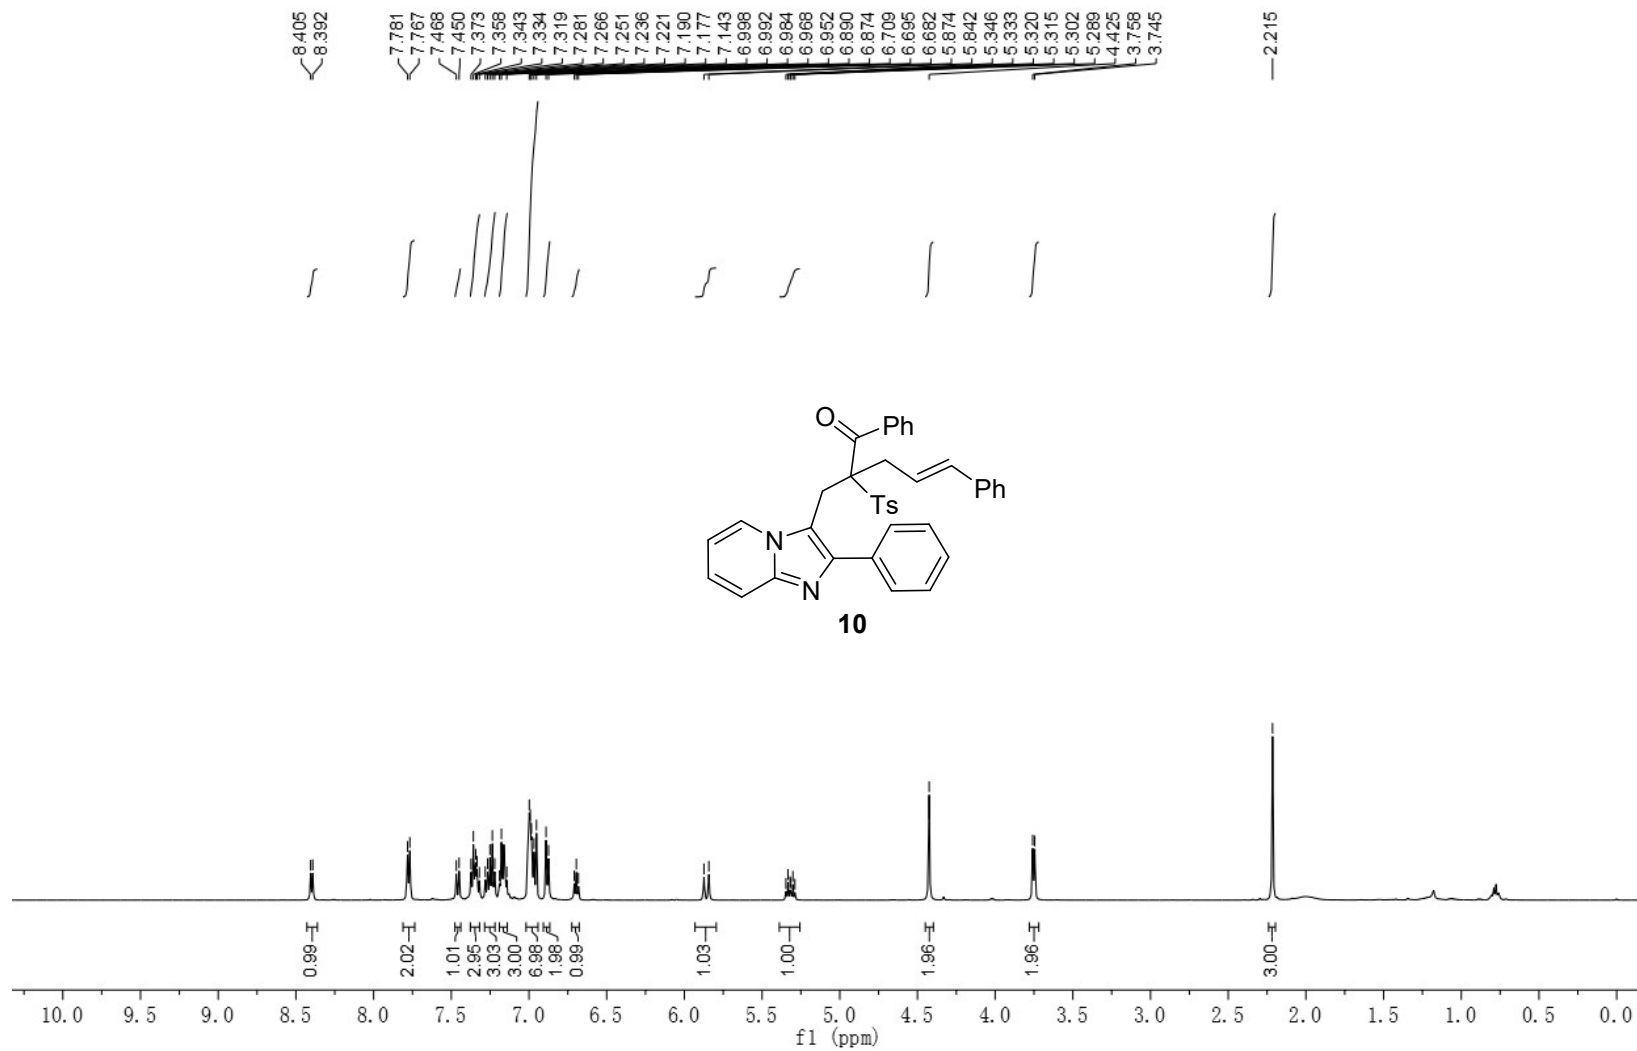

$^{13}\text{C}$  NMR (126 MHz,  $\text{CDCl}_3$ ) of **10**

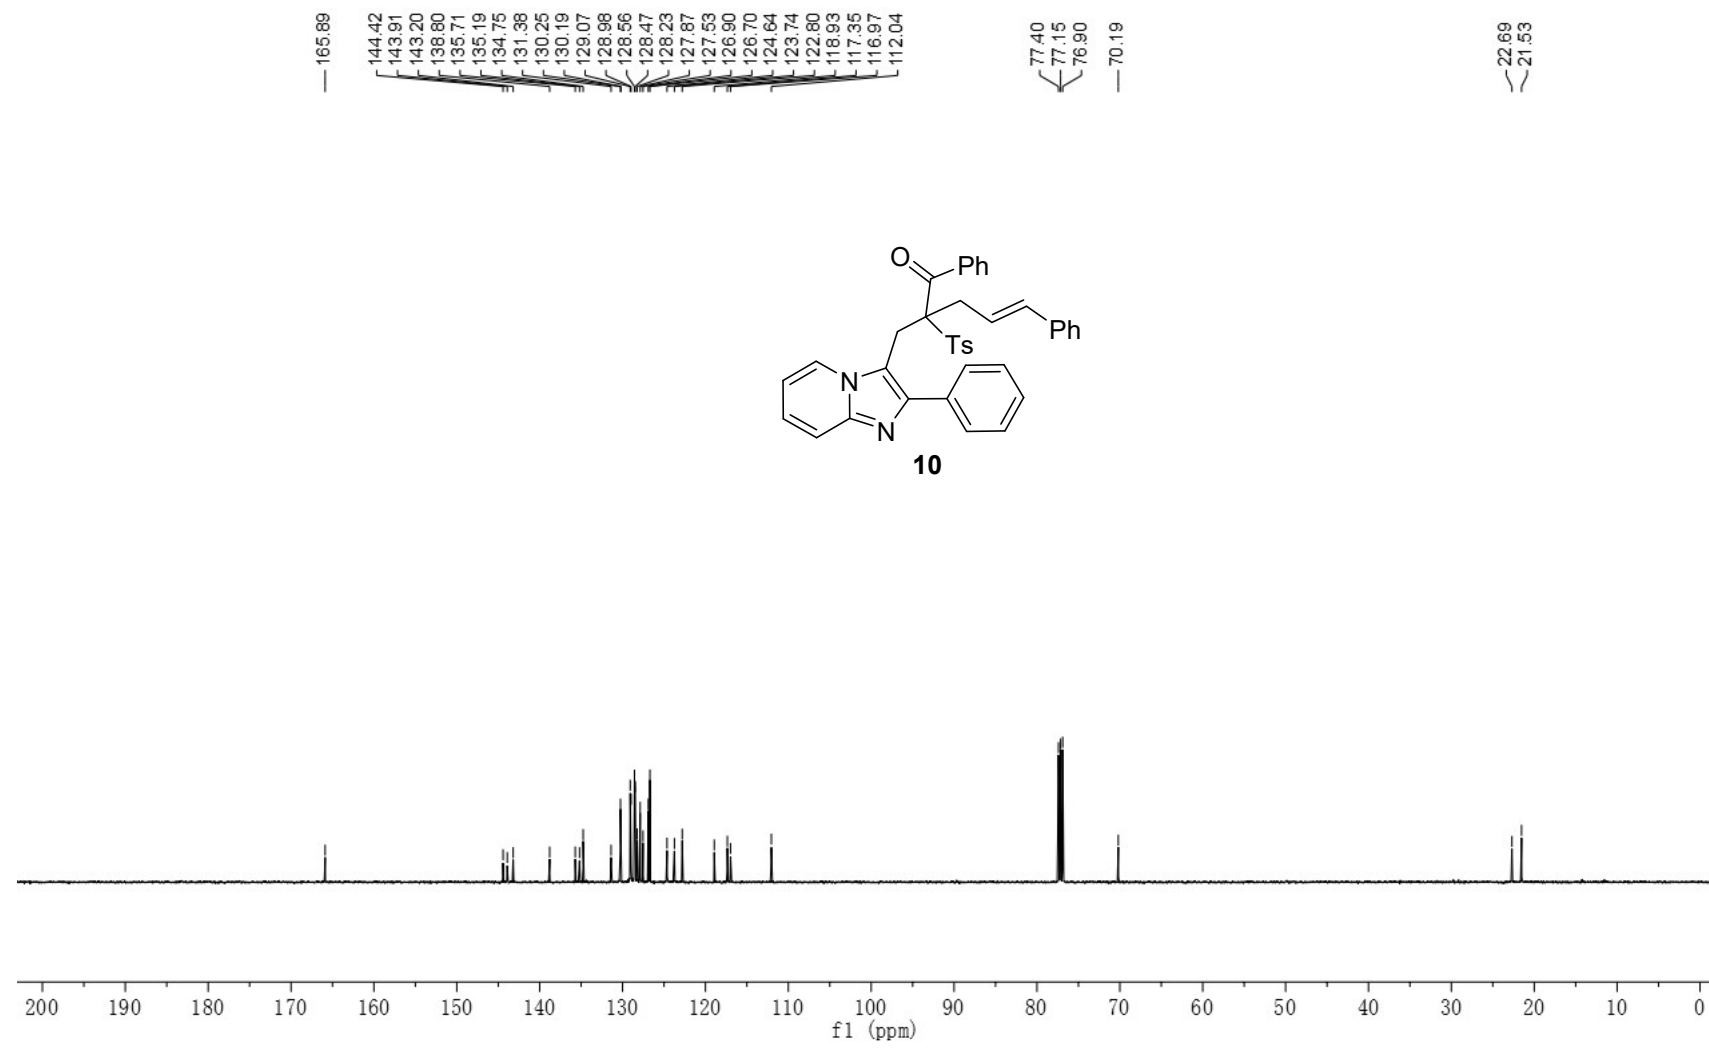

<sup>1</sup>H NMR (500 MHz, CDCl<sub>3</sub>) of **11a**

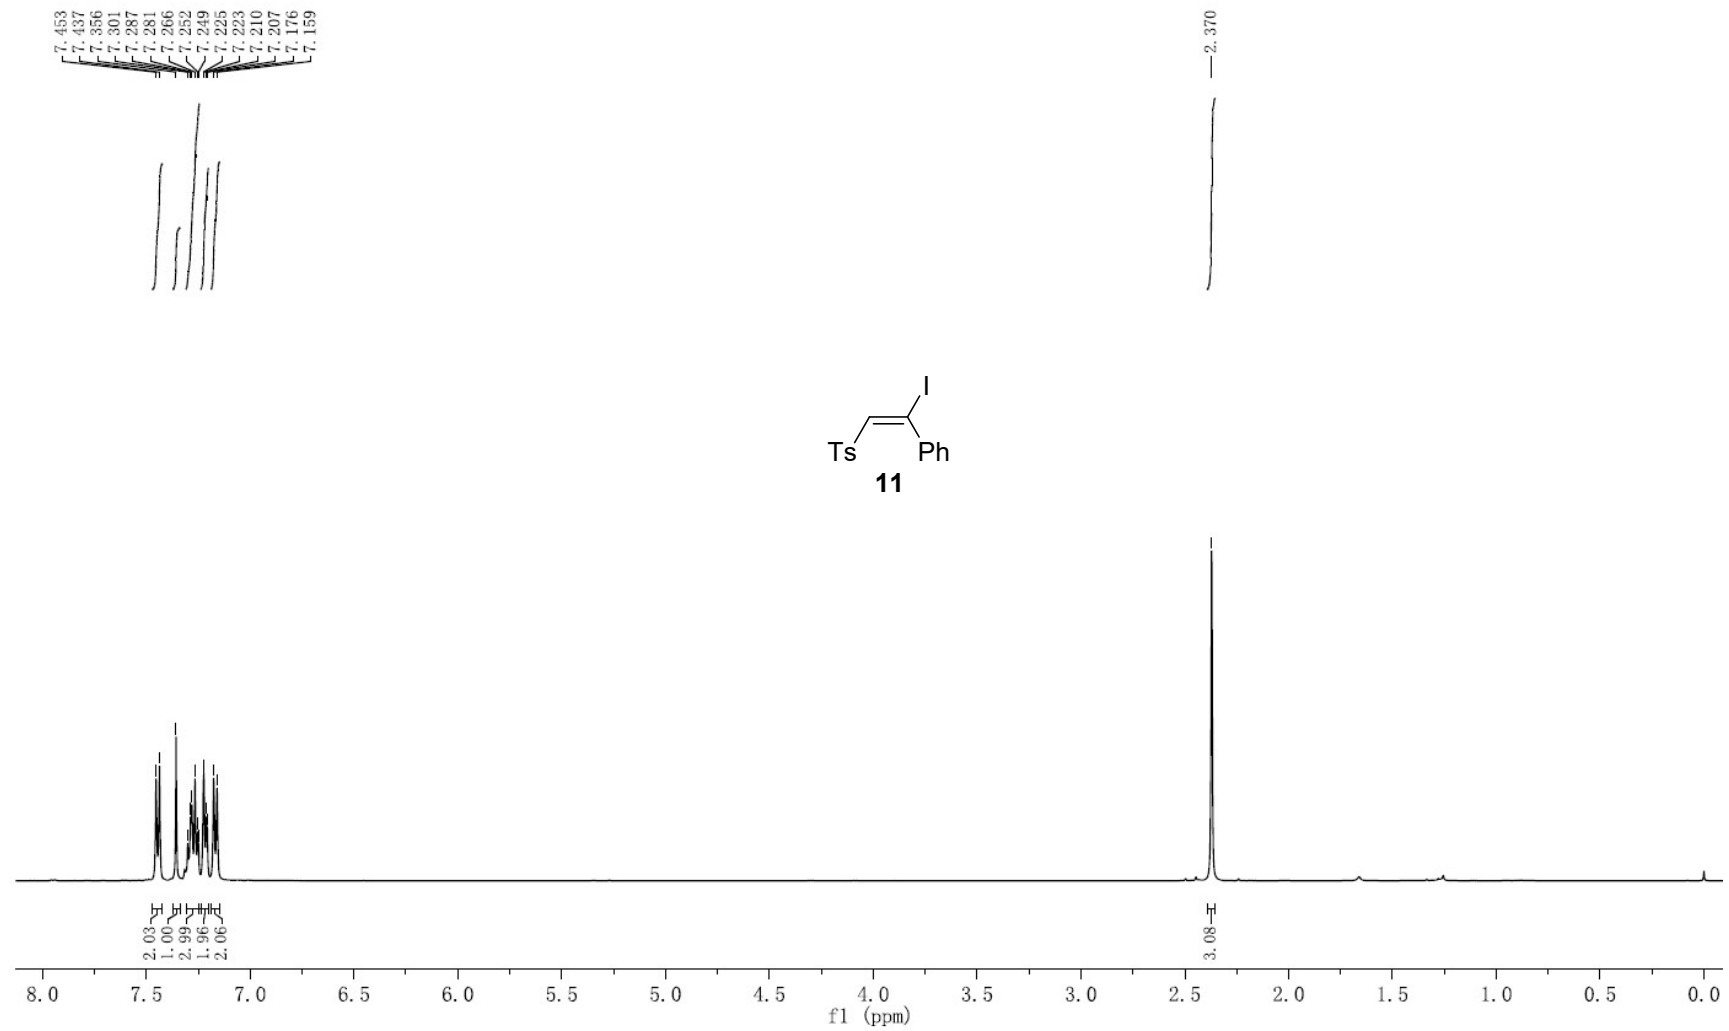



$^{13}\text{C}$  NMR (126 MHz,  $\text{CDCl}_3$ ) of **11a**

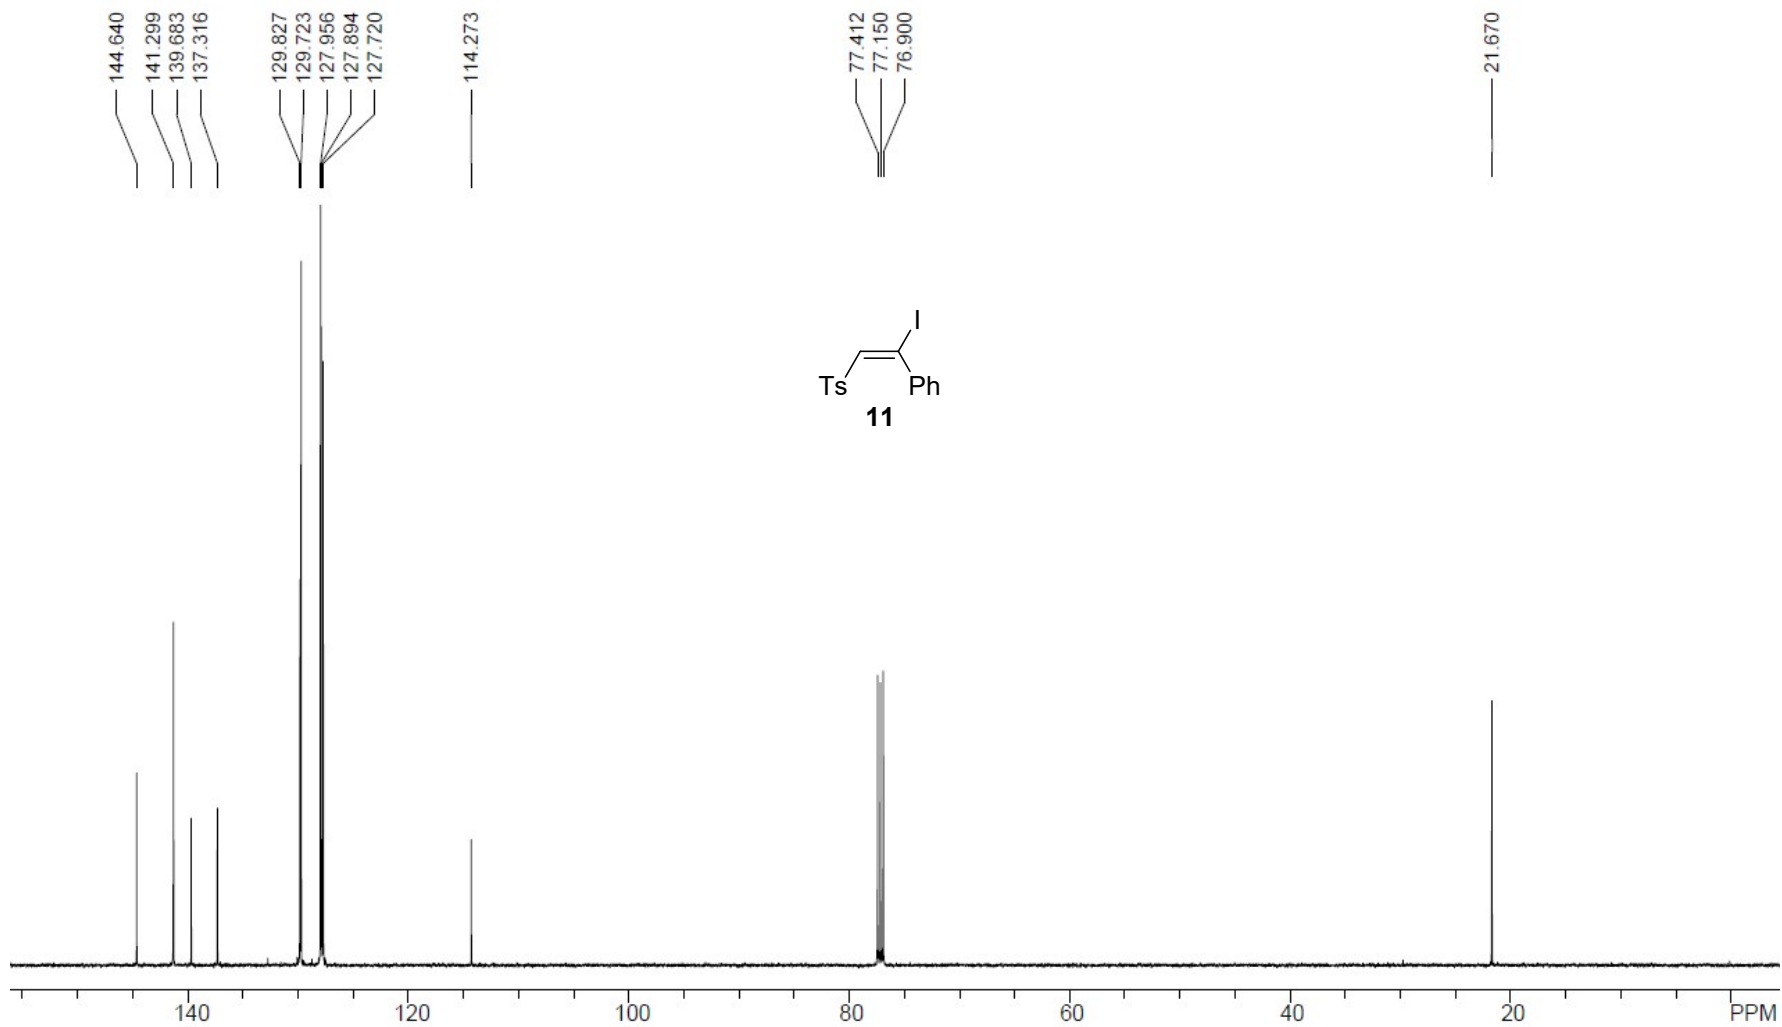

<sup>1</sup>H NMR (500 MHz, CDCl<sub>3</sub>) of **12a**

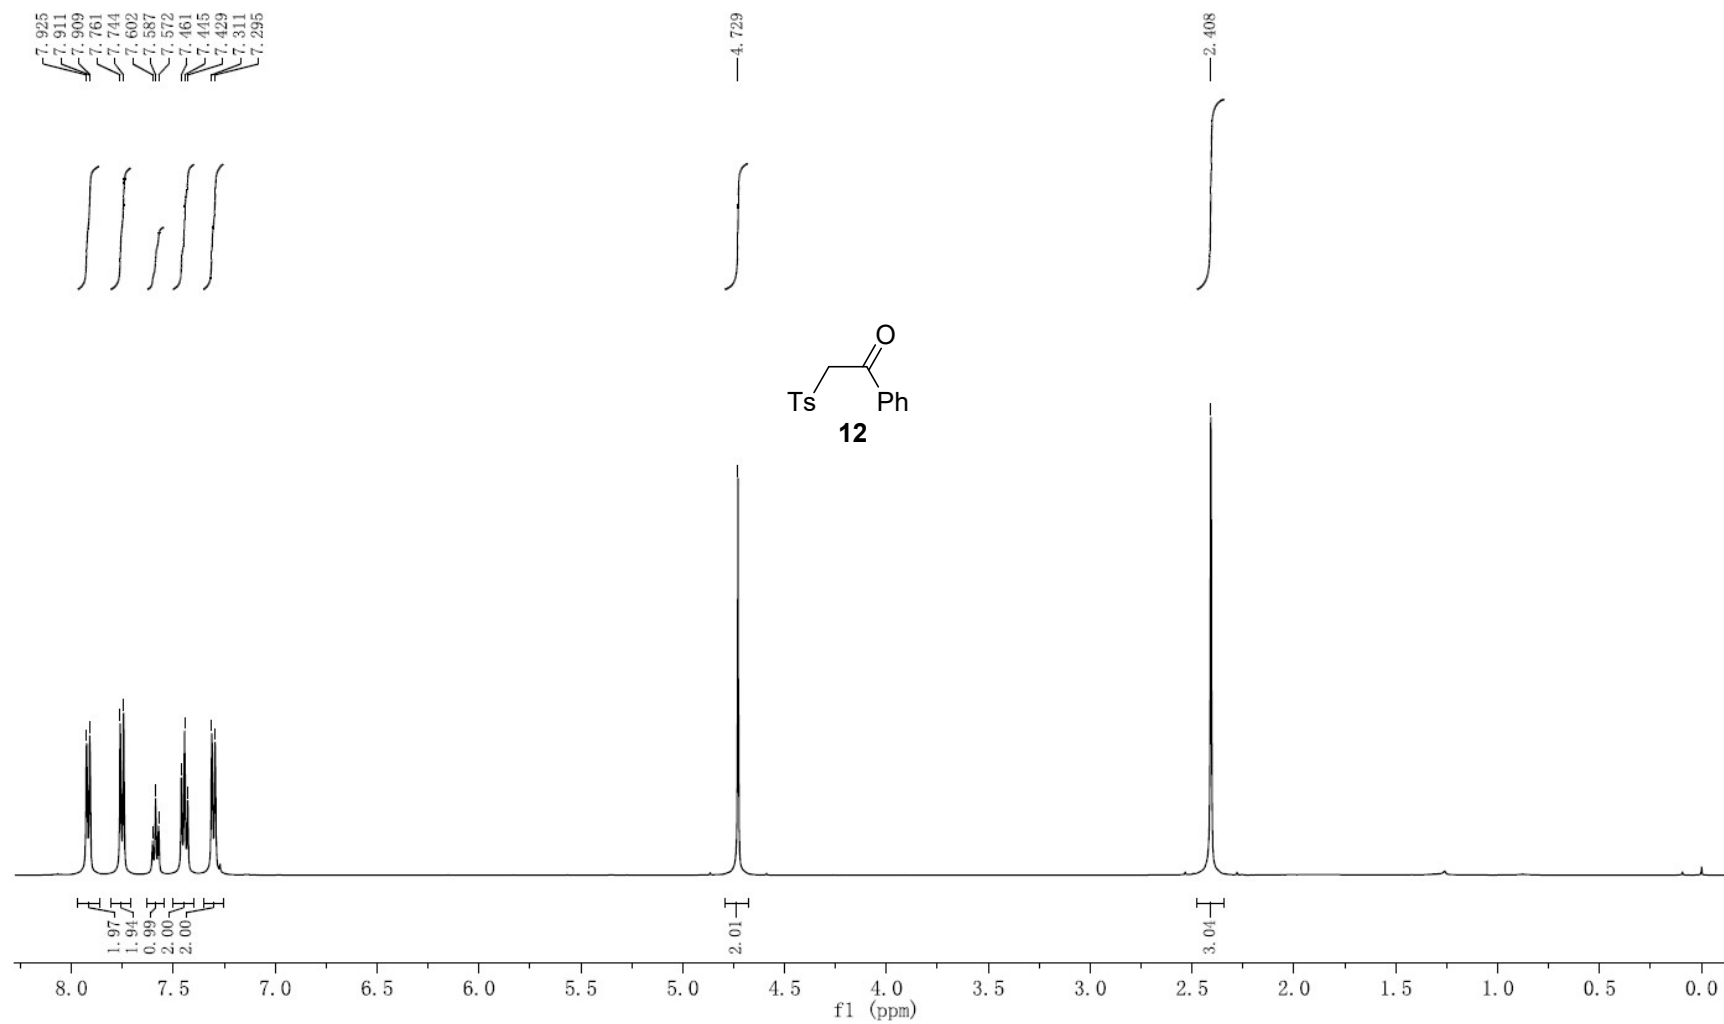

$^{13}\text{C}$  NMR (126 MHz,  $\text{CDCl}_3$ ) of **12a**

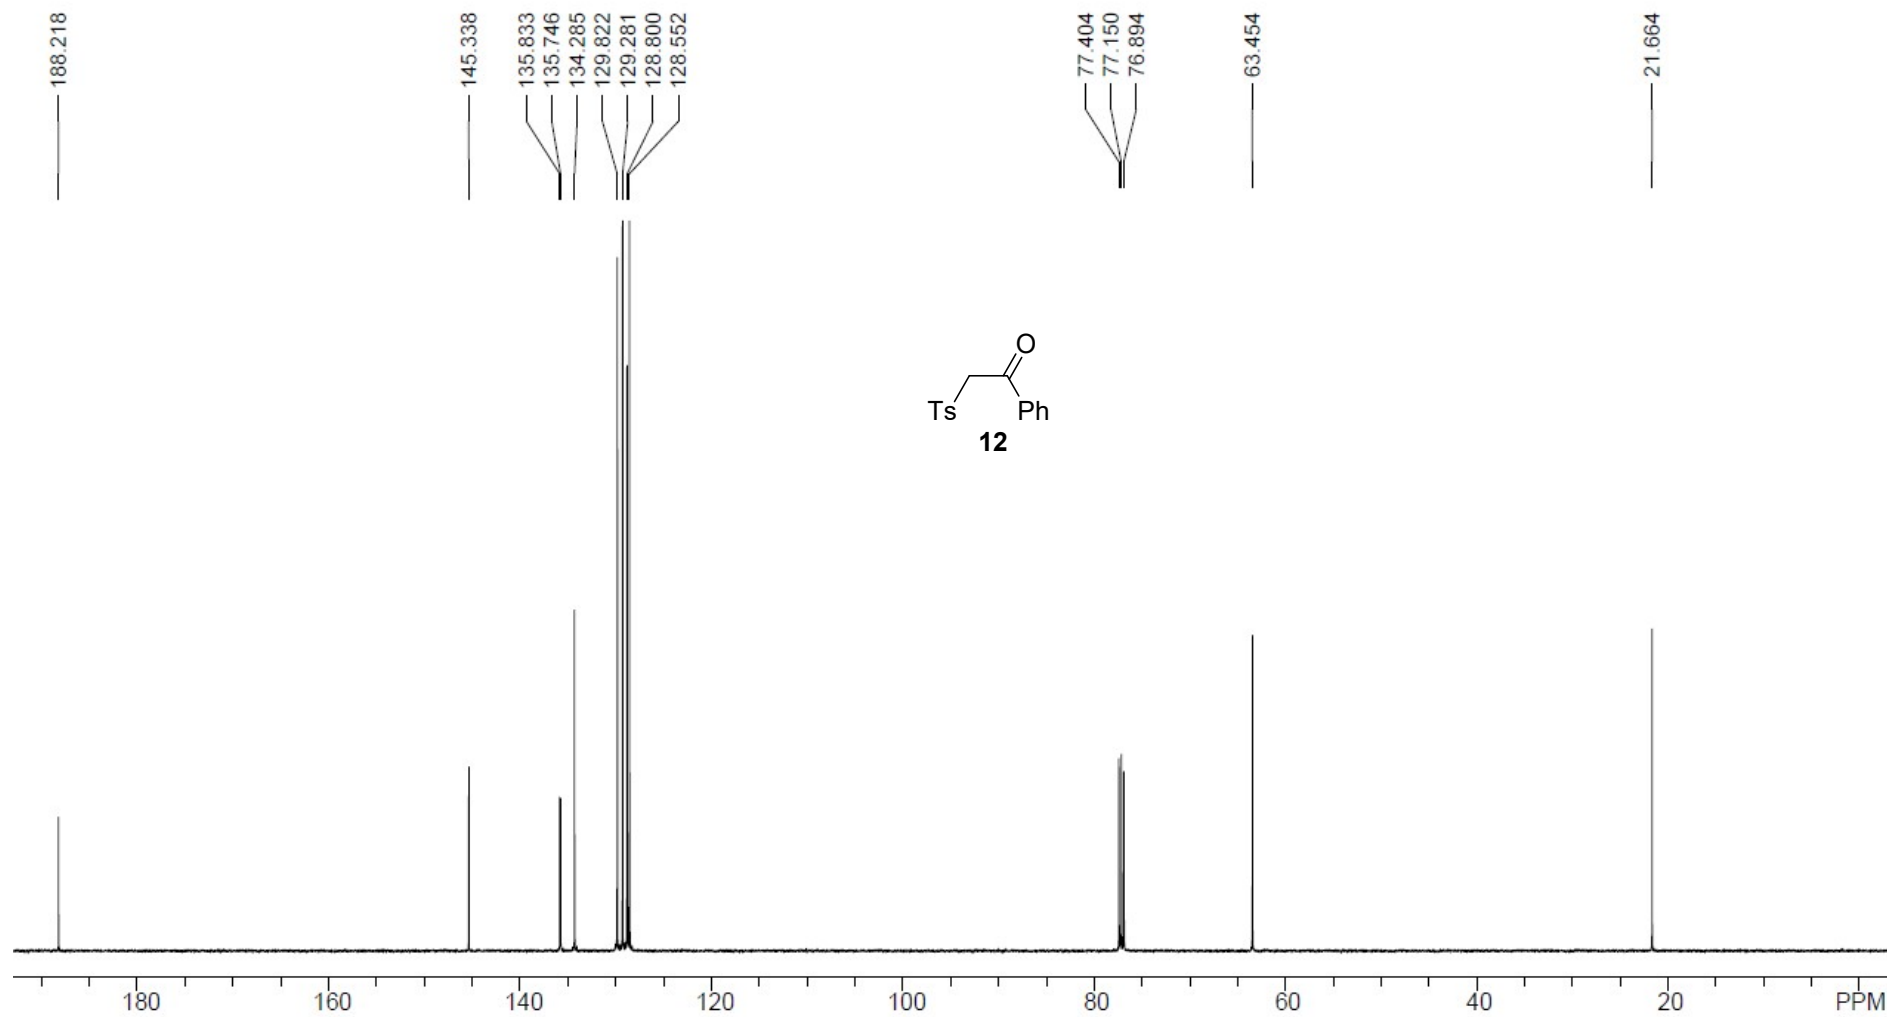

Supplement: d3cc03850e1.pdf [file d3cc03850e1.pdf]
